# Supplementary material for: AP2XII-1 and AP2XI-2 Suppress Schizogony Gene Expression in Toxoplasma gondii
Source: MDPI journal article supplement (doi:10.3390/ijms25105527), 2024-05-18
Supplement: s1 [file s1]

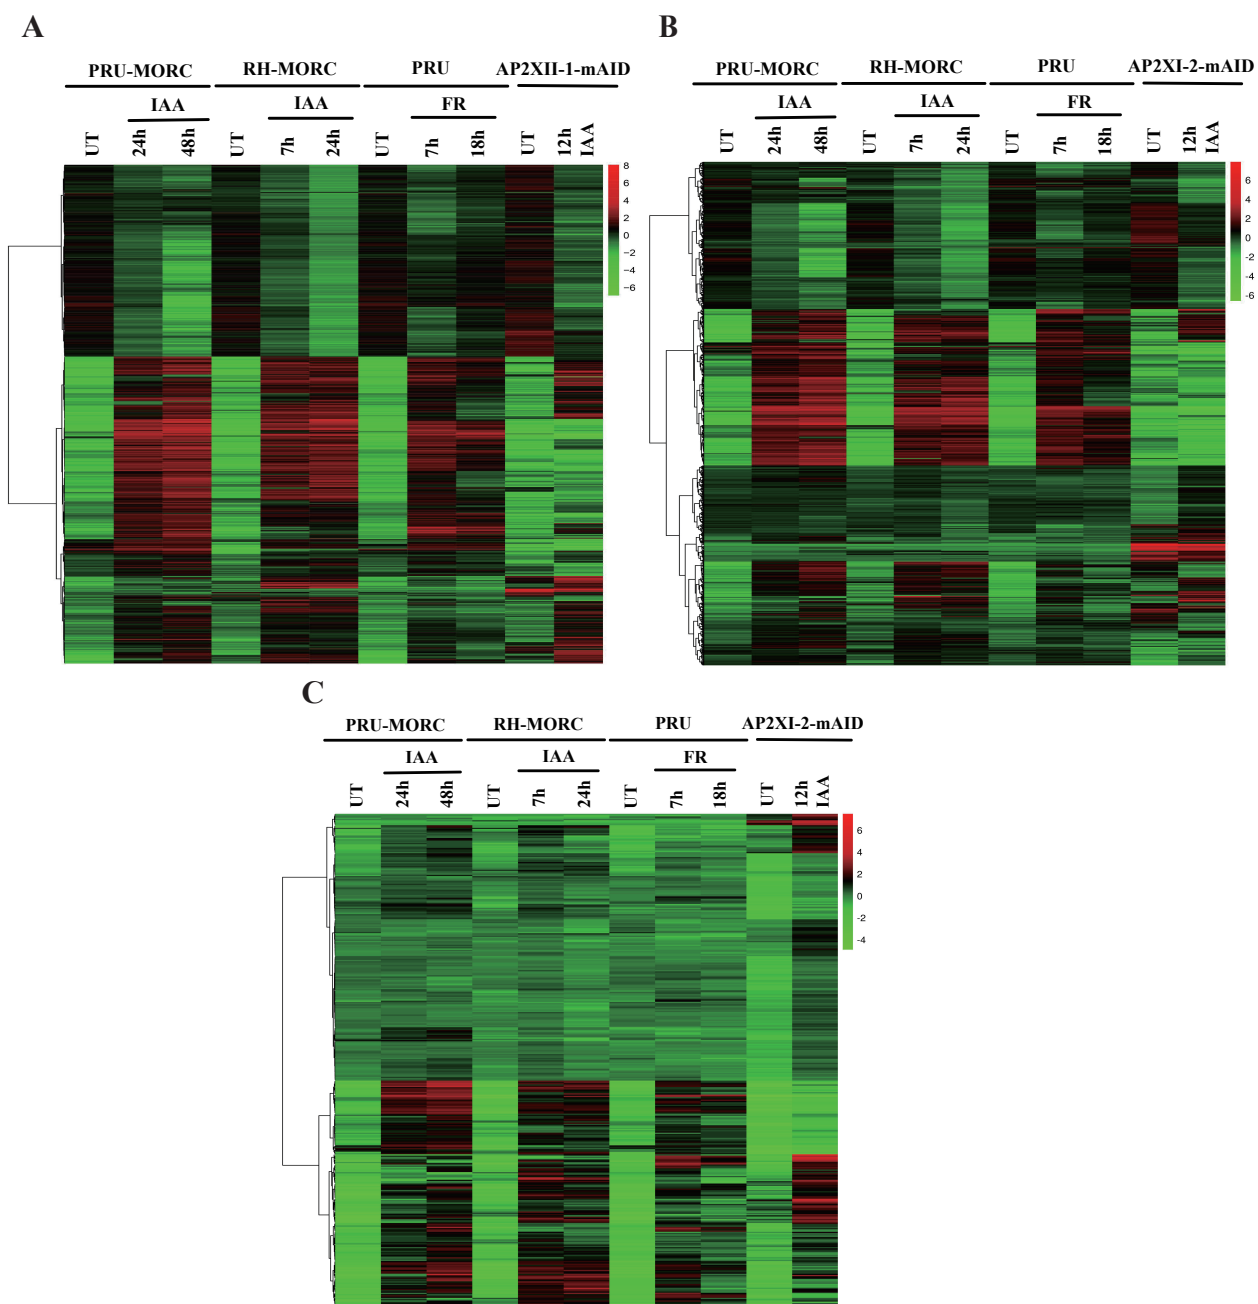

Figure S6. AP2XII-1 and AP2XI-2 downstream regulatory genes are consistent with MORC regulatory genes. Heatmaps showing differentially expressed genes after AP2XII-1 (A), AP2XI-2 (B) and MORC knockdown based on RNA-seq data. (C) Heatmap analysis of upregulated genes after AP2XI-2 and MORC knockdown.
