# Supplementary material for: AP2XII-1 and AP2XI-2 Suppress Schizogony Gene Expression in Toxoplasma gondii
Source: MDPI journal article supplement (doi:10.3390/ijms25105527), 2024-05-18
Supplement: s1 [file s1]

A

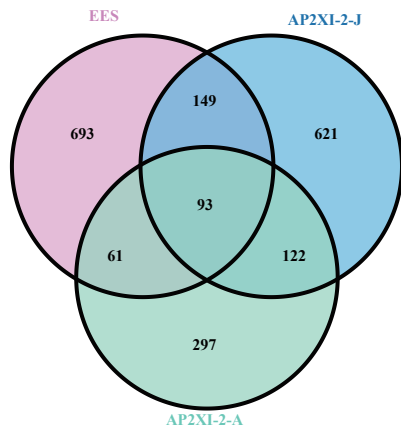

B

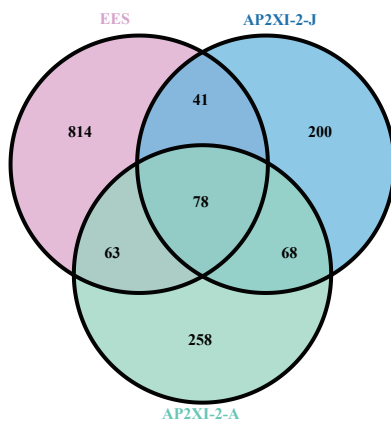

C

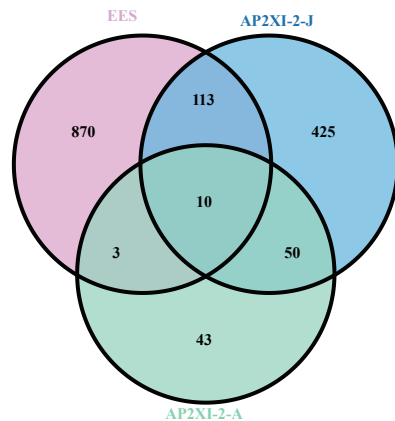

Figure S12. Highly overlap of differently expressed genes after AP2XI-2 knock-down in data from Antunes et al and this study. The RNA-seq data from Antunes et al and this study were compared, and the overall DEGs (A), upregulated genes (B), and downregulated genes (C) were overlapped by Venn diagrams. AP2XI-2-A, and AP2XI-2-J represents DEGs from Antunes et al and this study, respectively.
