# Supplementary material for: AP2XII-1 and AP2XI-2 Suppress Schizogony Gene Expression in Toxoplasma gondii
Source: MDPI journal article supplement (doi:10.3390/ijms25105527), 2024-05-18
Supplement: s1 [file s1]

**A****B**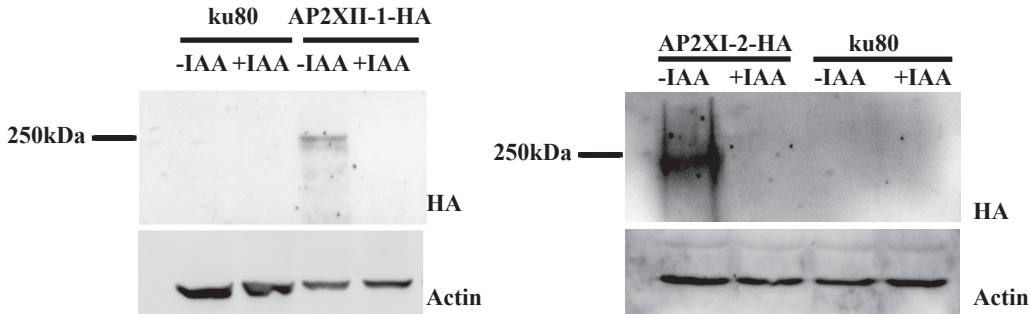

Figure S5. Western blot validation of the degradation of AP2XII-1 and AP2XI-2 proteins. RH $\Delta$ ku80, AP2XII-1-mAID (A) and AP2XI-2-mAID (B) parasites were treated with IAA or vehicle for 12 h, and subjected for immunoblotting using mouse anti-HA antibody. Actin was used as a loading control.
