# Supplementary material for: AP2XII-1 and AP2XI-2 Suppress Schizogony Gene Expression in Toxoplasma gondii
Source: MDPI journal article supplement (doi:10.3390/ijms25105527), 2024-05-18
Supplement: s1 [file s1]

**A**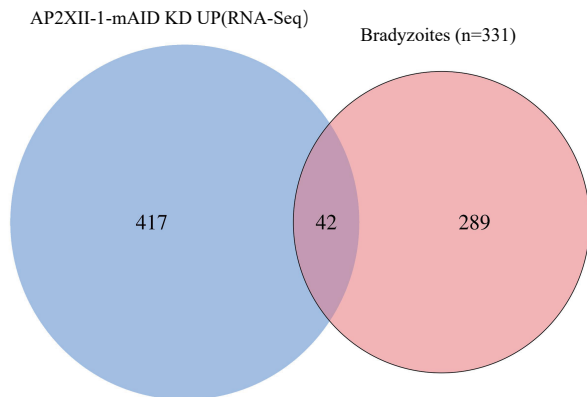**B**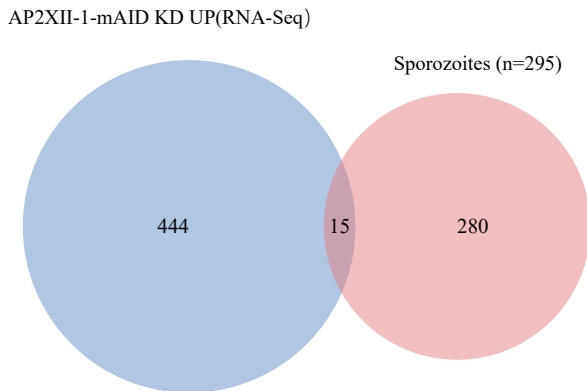

Figure S8. Transcription of a part of the bradyzoite and sporozoite-specific genes is affected after AP2XII-1 knockdown. (A) Overlap between up-regulated genes in AP2XII-1-mAID KD parasites and 331 genes exclusively expressed in bradyzoites. (B) Overlap between upregulated genes in AP2XII-1-mAID KD parasites and 295 genes exclusively expressed in sporozoites.
