# Supplementary material for: AP2XII-1 and AP2XI-2 Suppress Schizogony Gene Expression in Toxoplasma gondii
Source: MDPI journal article supplement (doi:10.3390/ijms25105527), 2024-05-18
Supplement: s1 [file s1]

**A**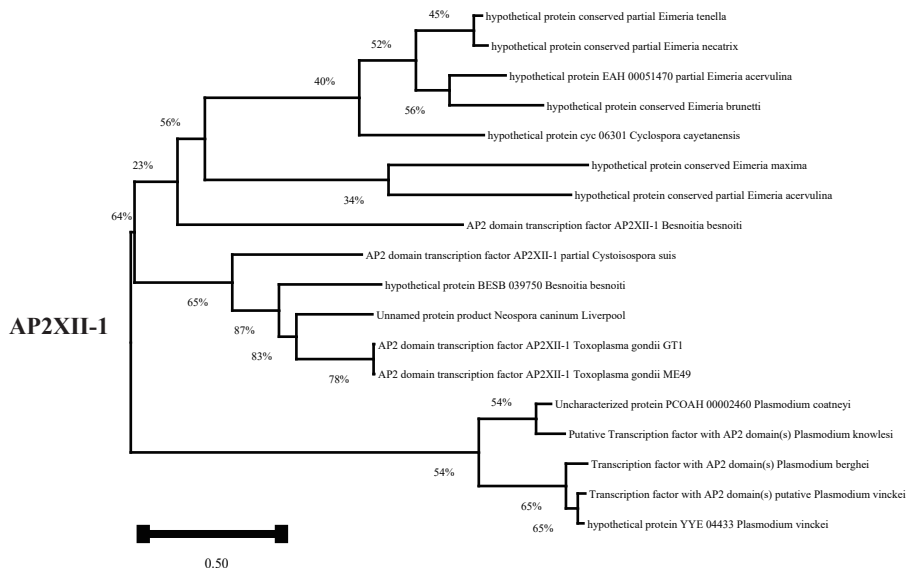**B**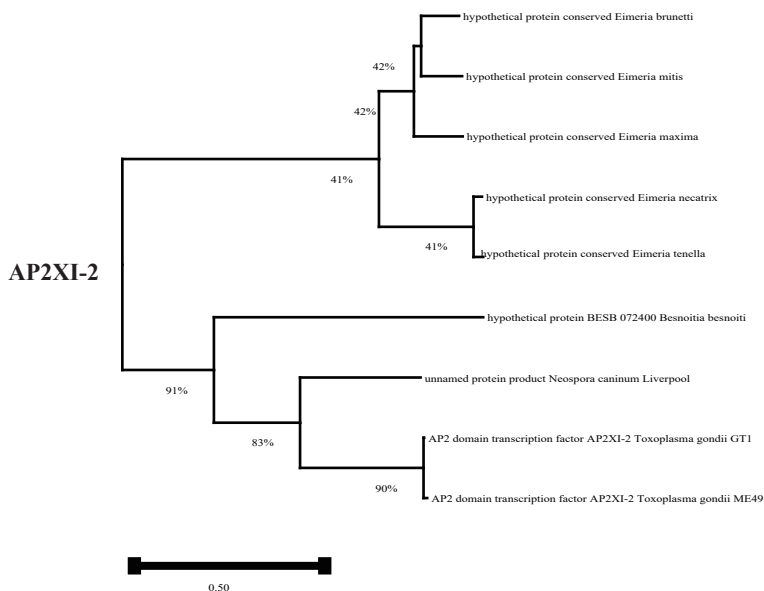

Figure S1. Phylogenetic trees demonstrating the relationship between the *Toxoplasma* ApiAP2 proteins and homologs sequences in other apicomplexan parasites. The numbers at the nodes indicate the percent out of 1000 bootstrapping trials. The full protein sequences from AP2XII-1 (A), AP2XI-2 (B) were used for blast to find their homologs.
