# Supplementary material for: AP2XII-1 and AP2XI-2 Suppress Schizogony Gene Expression in Toxoplasma gondii
Source: MDPI journal article supplement (doi:10.3390/ijms25105527), 2024-05-18
Supplement: s1 [file s1]

**A**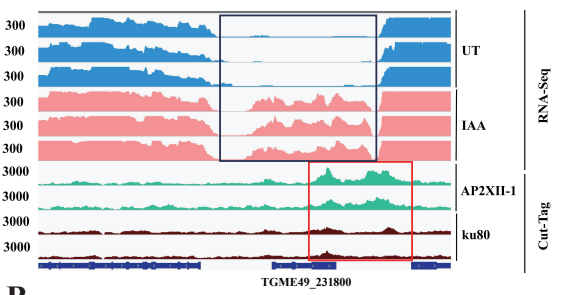**B**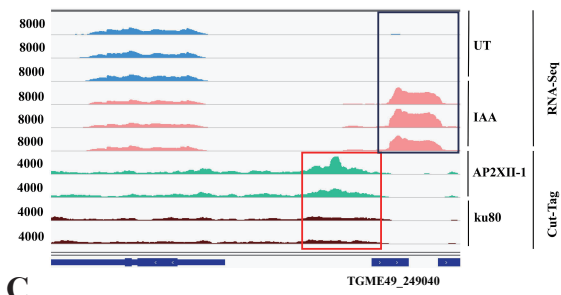**C**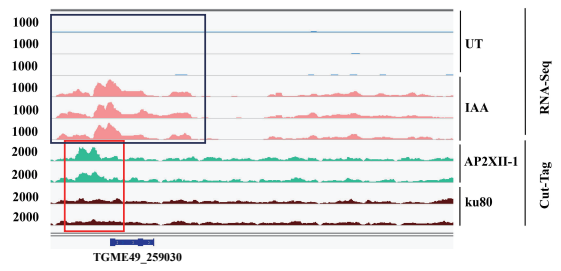**D**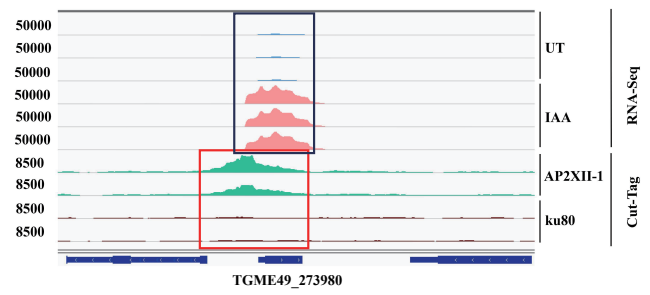**E**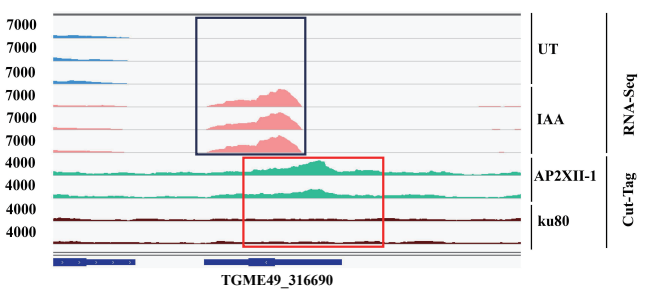

Figure S9. AP2XII-1 binds to the promoter of EES-specific genes and regulates their transcription. IGV screenshots of genomic regions of five EES-specific genes, including TGME49\_249040 (A), TGME49\_259030 (B), TGME49\_273980 (C), TGME49\_316690 (D) and TGME49\_231800 (E). Cut-Tag profiles were obtained using antibodies directed against HA (ApiAP2XII-1 tagged) in chromatin sampled from the ApiAP2XII-1-mAID-HA strain and the  $\Delta ku80$  strain. RNA-seq data from ApiAP2XII-1-mAID-HA parasites after 12 h of treatment or no treatment with IAA are shown in red and blue peaks. The normalized RPKM for Cut-Tag and RNA-seq reads are shown on the y-axis.
