# Supplementary material for: AP2XII-1 and AP2XI-2 Suppress Schizogony Gene Expression in Toxoplasma gondii
Source: MDPI journal article supplement (doi:10.3390/ijms25105527), 2024-05-18
Supplement: s1 [file s1]

A

B

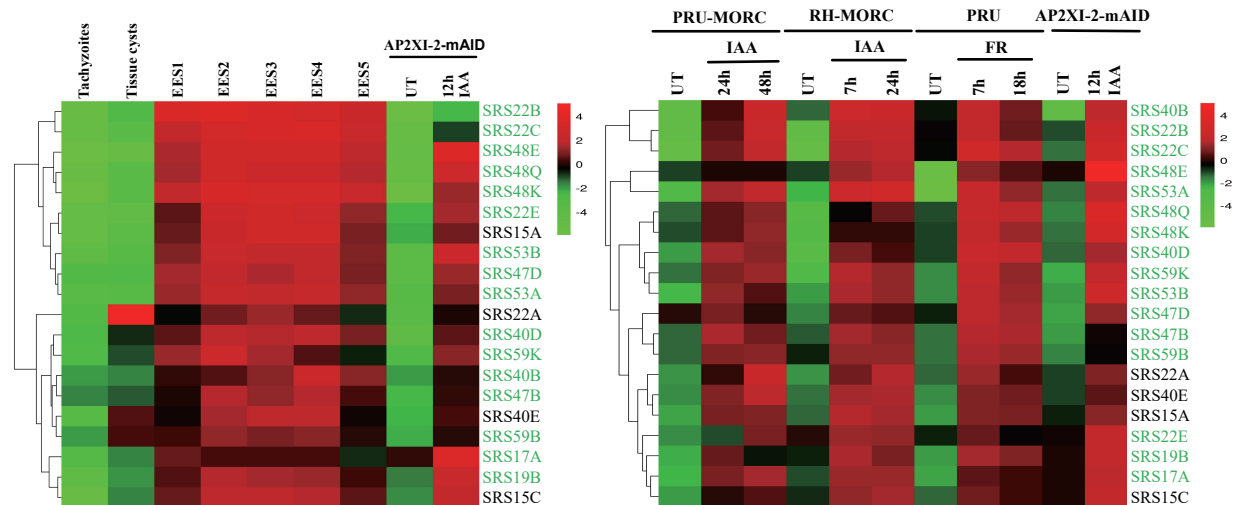

Figure S13. AP2XI-2 knockdown induces expression of EES-specific SRS surface proteins. (A) Heatmap showing highly upregulated SRS genes ( $\text{Log}_2\text{FC} \geq 2$ ) after AP2XI-2 knockdown, with emphasis on their expression at different life stages. Their transcript abundance at various developmental stages, namely tachyzoite, bradyzoite/cyst and EES stages, is displayed. The names of specific SRS proteins in the EES stage are shown in green font. (B) Heatmap showing highly upregulated SRS genes ( $\text{Log}_2\text{FC} \geq 2$ ) after AP2XI-2 and MORC knockdown.
