# Supplementary material for: AP2XII-1 and AP2XI-2 Suppress Schizogony Gene Expression in Toxoplasma gondii
Source: MDPI journal article supplement (doi:10.3390/ijms25105527), 2024-05-18
Supplement: s1 [file s1]

**A**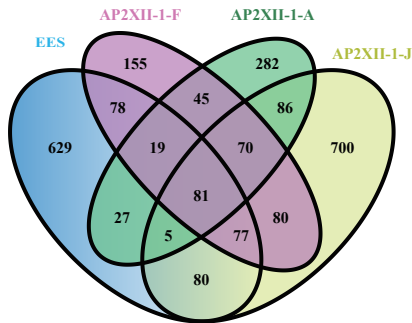**B**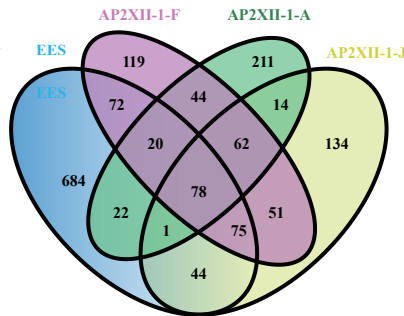**C**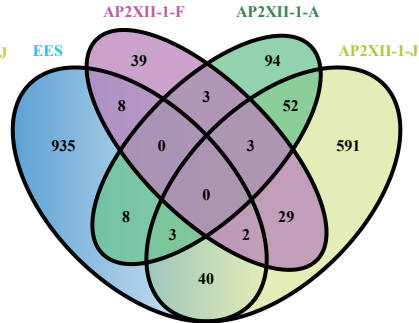

Figure S7. Highly overlap of differently expressed genes after AP2XII-1 knock-down in data from Fan et al , Antunes et al, and this study. The RNA-seq data from Fan et al, Antunes et al , and this study were compared, and the overall DEGs (A), upregulated genes (B), and downregulated genes (C) were overlapped by Venn diagrams. AP2XII-1-F, AP2XII-1-A, and AP2XII-1-J represents DEGs from Fan et al, Antunes et al, and this study, respectively.
