# Supplementary material for: AP2XII-1 and AP2XI-2 Suppress Schizogony Gene Expression in Toxoplasma gondii
Source: MDPI journal article supplement (doi:10.3390/ijms25105527), 2024-05-18
Supplement: s1 [file s1]

**A**

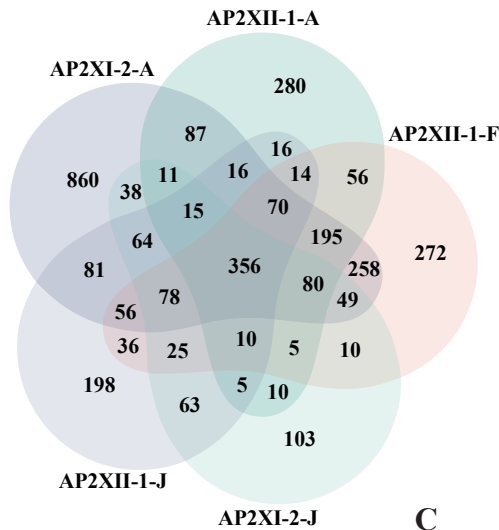

**B**

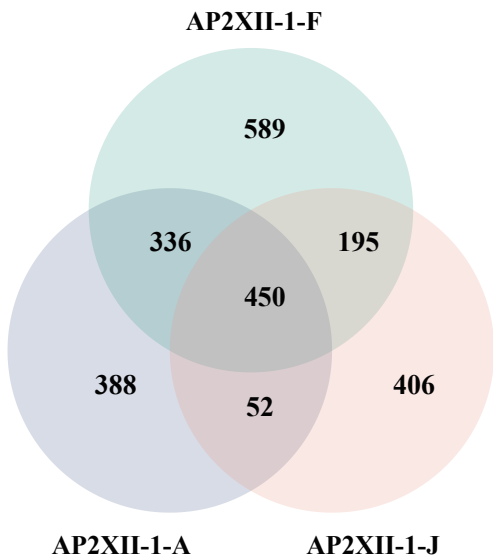

**C**

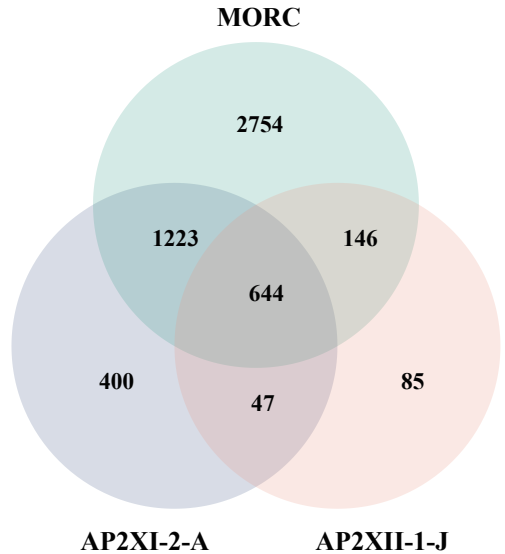

Figure S4. AP2XII-1, AP2XI-2 had good repeatability with downstream promoters regulated by MORC. (A) Venn diagram analysis of peaks for MORC (n=4767), AP2XII-1-J (n=1103), AP2XII-1-F (n=1570), AP2XII-1-A (n=1226), AP2XI-2-J (n=922), AP2XI-2-A (n=2323). (B) Venn diagram shows the AP2XII-1 peaks conducted by Fan et al (AP2XII-1-F), Antunes et al (AP2XII-1-A), and this study (AP2XII-1-J). (C) Venn diagram shows the AP2XI-2 peaks conducted by Antunes et al (AP2XI-2-A) and this study (AP2XI-2-J).
