# Supplementary material for: AP2XII-1 and AP2XI-2 Suppress Schizogony Gene Expression in Toxoplasma gondii
Source: MDPI journal article supplement (doi:10.3390/ijms25105527), 2024-05-18
Supplement: s1 [file s1]

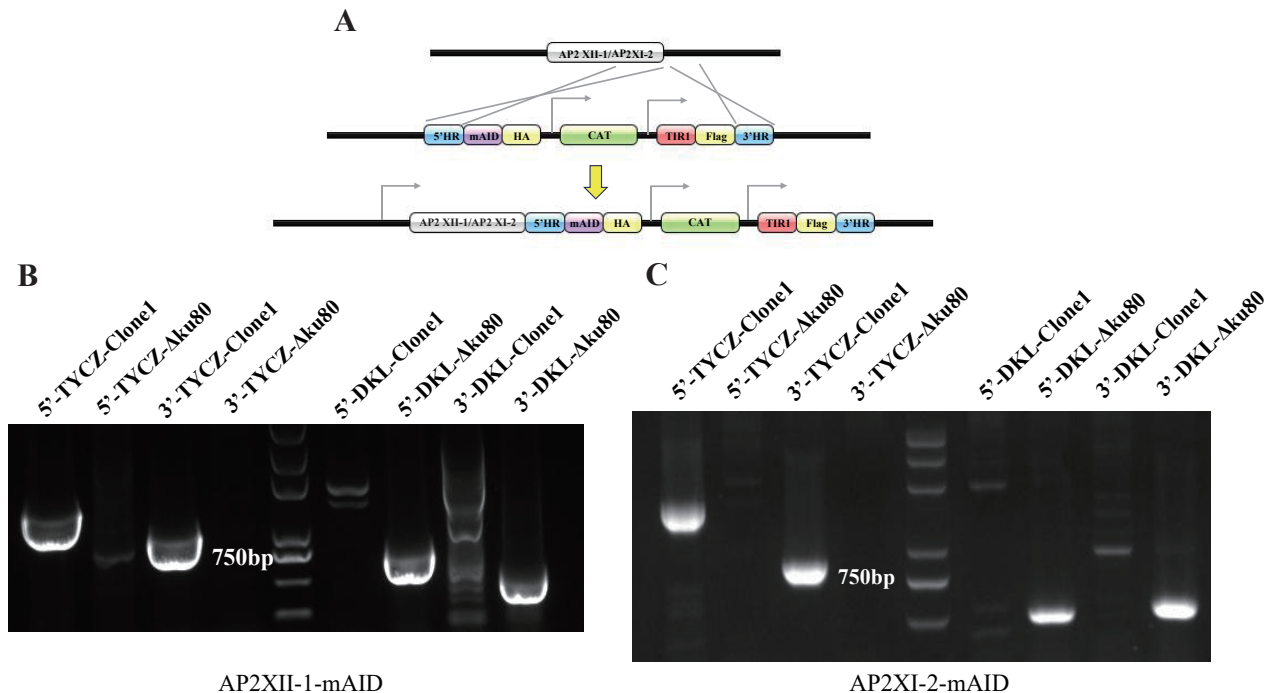

Figure S2. Construction and identification of AP2XII-1 and AP2XI-2 conditional knockdown parasites. (A) Diagram showing the construction strategy of the parasites. (B-C) Confirmation of recombinant and clonal lines of AP2XII-1-mAID-HA and AP2XI-2-mAID-HA by PCR.
