# Supplementary material for: AP2XII-1 and AP2XI-2 Suppress Schizogony Gene Expression in Toxoplasma gondii
Source: Int J Mol Sci. 2024 May 18;25(10):5527. doi: 10.3390/ijms25105527 (PMC11122372; doi:10.3390/ijms25105527)
Supplement: Supplementary file 1 [file ijms-25-05527-s001.zip › Table S1 .xlsx]

## Sheet: Sheet1
Table S1: The annotated Cut-Tag and Chip-seq peaks of AP2XII-1 and AP2XII-2. The peaks were annotated by ChIPseeker (Yu et al., 2015, Bioinformatics), and the overlapped peaks were identified by Irreproducibility Discovery Rate (IDR, Li et al., Annals of Applied Statistics). Cut-Tag (AP2XII-1-Jiang): cut-tag peaks generated in thsi study; Chip-seq (AP2XII-1-Fan): Chip-seq data of Fan et al., 2023…
Cut-Tag（AP2XII-1-Jiang）				Chip-seq(AP2XII-1-Fan)				Cut-Tag(AP2XII-1-Antunes）			Cut-Tag(AP2XII-2-Holmes）
ID	annotation	peak(rep_1)	peak(rep_2)	ID	annotation	peak(rep_1)	peak(rep_2)	ID	annotation	peak	ID	peak
TGME49_293290	Promoter (<=1kb)	1422	1257	TGME49_257670	Exon (TGME49_257670-t26_1/TGME49_257670	1731	659	TGME49_257670	Exon (TGME49_257670-t26_1/TGME49_257670	1505	TGME49_200010	234
TGME49_311700	Promoter (<=1kb)	1618	1697	TGME49_268020	Exon (TGME49_268020-t26_1/TGME49_268020	916	524	TGME49_268020	Exon (TGME49_268020-t26_1/TGME49_268020	562	TGME49_200250	429
TGME49_355120	Promoter (<=1kb)	405	397	TGME49_232990	Exon (TGME49_233000-t26_1/TGME49_233000	506	1399	TGME49_301260	Exon (TGME49_301270-t26_1/TGME49_301270	313	TGME49_200350	124
TGME49_286010	Promoter (<=1kb)	797	834	TGME49_259965	Exon (TGME49_259965-t26_1/TGME49_259965	319	462	TGME49_259965	Exon (TGME49_259965-t26_1/TGME49_259965	266	TGME49_200385	30
TGME49_243940	Promoter (<=1kb)	1626	958	TGME49_222170	Promoter (<=1kb)	748	1467	TGME49_260230	Exon (TGME49_260240-t26_1/TGME49_260240	360	TGME49_201100	209
TGME49_240880	Promoter (<=1kb)	3086	2987	TGME49_290000	Promoter (<=1kb)	523	1303	TGME49_213890	Exon (TGME49_213890-t26_1/TGME49_213890	643	TGME49_201120	86
TGME49_218955	Promoter (<=1kb)	1383	1254	TGME49_221630	Promoter (<=1kb)	397	748	TGME49_293370	Intron (TGME49_293370-t26_1/TGME49_293370	623	TGME49_201240	102
TGME49_293520	Exon (TGME49_293550-t26_1/TGME49_293550	404	447	TGME49_270920	Promoter (<=1kb)	301	413	TGME49_219440	Exon (TGME49_219440-t26_1/TGME49_219440	265	TGME49_201390	118
TGME49_206650	Promoter (<=1kb)	1470	1049	TGME49_221560	Promoter (<=1kb)	543	1356	TGME49_316635	Exon (TGME49_316650-t26_1/TGME49_316650	347	TGME49_201770	674
TGME49_224230	Promoter (<=1kb)	1229	1105	TGME49_300120	Promoter (<=1kb)	641	830	TGME49_293520	Exon (TGME49_293550-t26_1/TGME49_293550	231	TGME49_201820	992
TGME49_215910	Promoter (<=1kb)	1943	1247	TGME49_208560	Promoter (<=1kb)	1809	1942	TGME49_226072	Exon (TGME49_226068-t26_1/TGME49_226068	167	TGME49_201860	349
TGME49_246020	Promoter (<=1kb)	824	466	TGME49_254330	Promoter (<=1kb)	364	664	TGME49_246490	Exon (TGME49_246500-t26_1/TGME49_246500	243	TGME49_202020	155
TGME49_277240	Promoter (<=1kb)	389	383	TGME49_264485	Promoter (<=1kb)	1089	1370	TGME49_315950	Exon (TGME49_315950-t26_1/TGME49_315950	276	TGME49_202120	222
TGME49_205210	Promoter (<=1kb)	834	1154	TGME49_267150	Promoter (<=1kb)	245	663	TGME49_203200	Exon (TGME49_203200-t26_1/TGME49_203200	213	TGME49_202200	229
TGME49_228160	Promoter (<=1kb)	1305	1455	TGME49_215260	Promoter (<=1kb)	607	817	TGME49_281420	Intron (TGME49_281400-t26_1/TGME49_281400	160	TGME49_202500	513
TGME49_246210	Promoter (<=1kb)	1810	1044	TGME49_241880	Promoter (<=1kb)	268	1030	TGME49_219730	Exon (TGME49_219738-t26_1/TGME49_219738	120	TGME49_202620	1290
TGME49_276920	Promoter (<=1kb)	1476	1180	TGME49_227615	Promoter (<=1kb)	265	603	TGME49_219070	Exon (TGME49_218960-t26_1/TGME49_218960	251	TGME49_202680	238
TGME49_225110	Promoter (<=1kb)	1181	944	TGME49_226068	Promoter (<=1kb)	187	335	TGME49_316690	Exon (TGME49_316680-t26_1/TGME49_316680	607	TGME49_202770	404
TGME49_208730	Promoter (<=1kb)	1415	1168	TGME49_313273	Promoter (1-2kb)	237	536	TGME49_234980	Exon (TGME49_234980-t26_1/TGME49_234980	176	TGME49_202830	220
TGME49_318610	Promoter (<=1kb)	2133	1460	TGME49_249510	Promoter (<=1kb)	411	899	TGME49_289340	Exon (TGME49_289330-t26_1/TGME49_289330	147	TGME49_202840	294
TGME49_271970	Promoter (<=1kb)	594	623	TGME49_232130	Promoter (<=1kb)	200	410	TGME49_310750	Exon (TGME49_310750-t26_1/TGME49_310750	353	TGME49_202840	163
TGME49_294670	Promoter (<=1kb)	386	196	TGME49_275310	Promoter (<=1kb)	657	941	TGME49_222200	Exon (TGME49_222200-t26_1/TGME49_222200	189	TGME49_203010	335
TGME49_264640	Promoter (<=1kb)	232	221	TGME49_215730	3' UTR	669	390	TGME49_268250	Exon (TGME49_268250-t26_1/TGME49_268250	735	TGME49_203050	1079
TGME49_241710	Promoter (<=1kb)	1239	1328	TGME49_295400	Promoter (<=1kb)	310	846	TGME49_270260	Exon (TGME49_270260-t26_1/TGME49_270260	204	TGME49_203290	678
TGME49_267680	Promoter (<=1kb)	901	919	TGME49_213480	Distal Intergenic	408	440	TGME49_320010	Exon (TGME49_320010-t26_1/TGME49_320010	491	TGME49_203310	195
TGME49_320090	Promoter (<=1kb)	2066	738	TGME49_247740	Promoter (<=1kb)	309	453	TGME49_226650	Exon (TGME49_226660-t26_1/TGME49_226660	286	TGME49_203600	992
TGME49_300190	Promoter (<=1kb)	798	660	TGME49_258410	Promoter (<=1kb)	321	566	TGME49_202840	Exon (TGME49_202840-t26_1/TGME49_202840	180	TGME49_203682	312
TGME49_310900	Promoter (1-2kb)	936	647	TGME49_288650	Promoter (<=1kb)	170	712	TGME49_234410	Exon (TGME49_234410-t26_1/TGME49_234410	346	TGME49_203780	673
TGME49_204290	Promoter (<=1kb)	792	651	TGME49_233830	Promoter (<=1kb)	428	431	TGME49_306020	Exon (TGME49_306020-t26_1/TGME49_306020	184	TGME49_203790	634
TGME49_280465	Promoter (<=1kb)	1512	1651	TGME49_247220	Promoter (<=1kb)	190	1130	TGME49_313273	Exon (TGME49_313270-t26_1/TGME49_313270	128	TGME49_203820	1636
TGME49_267670	Promoter (<=1kb)	1234	701	TGME49_209450	Promoter (<=1kb)	402	793	TGME49_201700	Exon (TGME49_201700-t26_1/TGME49_201700	209	TGME49_203960	172
TGME49_286590	Promoter (<=1kb)	1668	1242	TGME49_264940	Promoter (<=1kb)	958	423	TGME49_213635	Exon (TGME49_213635-t26_1/TGME49_213635	286	TGME49_204010	79
TGME49_320480	Promoter (<=1kb)	1068	607	TGME49_294760	Promoter (<=1kb)	179	465	TGME49_264140	Exon (TGME49_264140-t26_1/TGME49_264140	254	TGME49_204130	528
TGME49_220060	Distal Intergenic	142	141	TGME49_200330	Promoter (<=1kb)	265	442	TGME49_247290	Exon (TGME49_247290-t26_1/TGME49_247290	352	TGME49_204270	645
TGME49_316690	Promoter (<=1kb)	1689	1651	TGME49_228230	Promoter (<=1kb)	901	1066	TGME49_221280	Exon (TGME49_221280-t26_1/TGME49_221280	127	TGME49_204330	803
TGME49_257350	Promoter (<=1kb)	844	879	TGME49_234930	Promoter (<=1kb)	232	429	TGME49_307570	Exon (TGME49_307570-t26_1/TGME49_307570	416	TGME49_204420	454
TGME49_257568	Promoter (<=1kb)	1898	1736	TGME49_238480	Promoter (<=1kb)	214	419	TGME49_318440	Exon (TGME49_318440-t26_1/TGME49_318440	172	TGME49_204480	226
TGME49_216200	Promoter (<=1kb)	1398	1685	TGME49_232370	Promoter (<=1kb)	177	717	TGME49_202770	Exon (TGME49_202770-t26_1/TGME49_202770	124	TGME49_204500	84
TGME49_239090	Promoter (<=1kb)	600	568	TGME49_209730	Promoter (<=1kb)	213	361	TGME49_265250	Exon (TGME49_265250-t26_1/TGME49_265250	249	TGME49_205050	339
TGME49_309410	Promoter (<=1kb)	1341	976	TGME49_260400	Promoter (<=1kb)	199	756	TGME49_288420	Exon (TGME49_288420-t26_1/TGME49_288420	193	TGME49_205050	206
TGME49_237550	Promoter (<=1kb)	815	816	TGME49_270510	Promoter (<=1kb)	343	1001	TGME49_230080	Intron (TGME49_230080-t26_1/TGME49_230080	197	TGME49_205060	186
TGME49_232955	Promoter (<=1kb)	789	272	TGME49_269650	3' UTR	157	261	TGME49_233080	Exon (TGME49_233080-t26_1/TGME49_233080	137	TGME49_205160	349
TGME49_269010	Promoter (<=1kb)	851	365	TGME49_226710	Promoter (<=1kb)	276	423	TGME49_242435	Intron (TGME49_242435-t26_1/TGME49_242435	88	TGME49_205180	198
TGME49_256800	Promoter (<=1kb)	929	1233	TGME49_219070	Promoter (<=1kb)	200	421	TGME49_304955	Intron (TGME49_304955-t26_1/TGME49_304955	190	TGME49_205210	384
TGME49_231880	Promoter (<=1kb)	950	1134	TGME49_305120	Promoter (<=1kb)	650	878	TGME49_265780	Exon (TGME49_265780-t26_1/TGME49_265780	272	TGME49_205290	13
TGME49_462910	Promoter (<=1kb)	1005	929	TGME49_204400	Promoter (<=1kb)	445	1772	TGME49_270150	Exon (TGME49_270150-t26_1/TGME49_270150	142	TGME49_205350	192
TGME49_289530	Promoter (<=1kb)	894	1047	TGME49_318160	Promoter (<=1kb)	203	360	TGME49_232250	Exon (TGME49_232250-t26_1/TGME49_232250	110	TGME49_205350	11
TGME49_233460	Promoter (<=1kb)	545	1345	TGME49_219470	Promoter (<=1kb)	305	594	TGME49_233500	Exon (TGME49_233500-t26_1/TGME49_233500	420	TGME49_205370	596
TGME49_250770	Promoter (<=1kb)	991	633	TGME49_319850	Promoter (<=1kb)	132	717	TGME49_255460	Exon (TGME49_255460-t26_1/TGME49_255460	199	TGME49_205390	308
TGME49_201180	Promoter (<=1kb)	1184	880	TGME49_227800	Promoter (1-2kb)	198	324	TGME49_297510	Intron (TGME49_297520-t26_1/TGME49_297520	90	TGME49_205558	371
TGME49_270880	Distal Intergenic	1105	432	TGME49_254910	Promoter (<=1kb)	341	623	TGME49_261030	Exon (TGME49_261022-t26_1/TGME49_261022	193	TGME49_205650	654
TGME49_300690	Promoter (<=1kb)	294	177	TGME49_233530	Promoter (<=1kb)	251	451	TGME49_289050	Exon (TGME49_289050-t26_1/TGME49_289050	396	TGME49_205650	229
TGME49_311720	Promoter (<=1kb)	479	671	TGME49_320770	Promoter (<=1kb)	193	427	TGME49_281510	Exon (TGME49_281510-t26_1/TGME49_281510	100	TGME49_205700	707
TGME49_203800	Promoter (1-2kb)	461	416	TGME49_240370	Promoter (<=1kb)	137	343	TGME49_306430	Exon (TGME49_306440-t26_1/TGME49_306440	322	TGME49_206430	644
TGME49_257530	Promoter (<=1kb)	1525	857	TGME49_248140	Promoter (<=1kb)	174	544	TGME49_244190	Exon (TGME49_244190-t26_1/TGME49_244190	142	TGME49_206510	199
TGME49_210408	Promoter (<=1kb)	1157	1244	TGME49_275370	Promoter (<=1kb)	131	819	TGME49_232580	Exon (TGME49_232560-t26_1/TGME49_232560	421	TGME49_206590	365
TGME49_233460	Promoter (<=1kb)	143	377	TGME49_267500	Promoter (<=1kb)	184	354	TGME49_292935	Exon (TGME49_292935-t26_1/TGME49_292935	123	TGME49_206630	567
TGME49_288360	Promoter (<=1kb)	1195	673	TGME49_254390	Promoter (<=1kb)	304	713	TGME49_261080	Intron (TGME49_261080-t26_1/TGME49_261080	177	TGME49_206650	219
TGME49_269417	Promoter (<=1kb)	561	783	TGME49_221390	Promoter (<=1kb)	202	928	TGME49_214240	Exon (TGME49_214240-t26_1/TGME49_214240	62	TGME49_207005	39
TGME49_244510	Promoter (<=1kb)	1158	920	TGME49_254870	Promoter (<=1kb)	1059	1347	TGME49_214835	Exon (TGME49_214840-t26_1/TGME49_214840	83	TGME49_207010	99
TGME49_314250	Promoter (<=1kb)	2265	1599	TGME49_233400	Promoter (<=1kb)	173	504	TGME49_203290	Exon (TGME49_203300-t26_1/TGME49_203300	140	TGME49_207590	137
TGME49_249510	Promoter (<=1kb)	593	452	TGME49_230510	Promoter (<=1kb)	147	473	TGME49_276180	Exon (TGME49_276180-t26_1/TGME49_276180	170	TGME49_207965	43
TGME49_253505	Promoter (<=1kb)	949	1122	TGME49_310060	Promoter (<=1kb)	210	668	TGME49_232450	Intron (TGME49_232450-t26_1/TGME49_232450	34	TGME49_208020	1518
TGME49_215895	Promoter (<=1kb)	2423	2265	TGME49_203540	Promoter (1-2kb)	596	1343	TGME49_297870	Exon (TGME49_297870-t26_1/TGME49_297870	83	TGME49_208020	202
TGME49_204410	Promoter (<=1kb)	204	352	TGME49_219750	Promoter (<=1kb)	149	693	TGME49_202140	Exon (TGME49_202120-t26_1/TGME49_202120	159	TGME49_208560	339
TGME49_207370	Promoter (<=1kb)	441	346	TGME49_295658	Promoter (<=1kb)	151	199	TGME49_201220	Exon (TGME49_201220-t26_1/TGME49_201220	461	TGME49_208710	81
TGME49_201150	Promoter (<=1kb)	1092	848	TGME49_288840	Promoter (<=1kb)	401	376	TGME49_289720	Intron (TGME49_289730-t26_1/TGME49_289730	165	TGME49_208730	674
TGME49_266368	Promoter (<=1kb)	688	333	TGME49_292110	Promoter (<=1kb)	122	685	TGME49_239365	Exon (TGME49_239365-t26_1/TGME49_239365	266	TGME49_208740	316
TGME49_243120	Promoter (<=1kb)	332	319	TGME49_208830	Promoter (<=1kb)	215	441	TGME49_247050	Exon (TGME49_247050-t26_1/TGME49_247050	205	TGME49_208820	172
TGME49_316510	Promoter (<=1kb)	574	1064	TGME49_255220	Promoter (<=1kb)	198	781	TGME49_289940	Exon (TGME49_289940-t26_1/TGME49_289940	525	TGME49_208850	340
TGME49_249410	Promoter (<=1kb)	1295	736	TGME49_301470	Promoter (<=1kb)	512	1080	TGME49_305190	Exon (TGME49_305190-t26_1/TGME49_305190	625	TGME49_208980	225
TGME49_227430	Promoter (<=1kb)	760	671	TGME49_269350	Promoter (<=1kb)	150	348	TGME49_263740	Exon (TGME49_263740-t26_1/TGME49_263740	377	TGME49_209030	721
TGME49_319560	Promoter (<=1kb)	1521	1483	TGME49_258780	Promoter (<=1kb)	110	399	TGME49_315798	Exon (TGME49_315798-t26_1/TGME49_315798	145	TGME49_209030	131
TGME49_283870	Promoter (1-2kb)	527	323	TGME49_277070	Promoter (<=1kb)	254	520	TGME49_242640	Exon (TGME49_242640-t26_1/TGME49_242640	362	TGME49_209050	377
TGME49_239260	Promoter (<=1kb)	964	962	TGME49_255300	Promoter (<=1kb)	244	904	TGME49_223880	Exon (TGME49_223880-t26_1/TGME49_223880	136	TGME49_209050	383
TGME49_270510	Promoter (<=1kb)	847	510	TGME49_235340	Promoter (<=1kb)	181	1373	TGME49_223262	Exon (TGME49_223262-t26_1/TGME49_223262	173	TGME49_209210	140
TGME49_319640	Promoter (<=1kb)	448	644	TGME49_215150	Promoter (<=1kb)	261	763	TGME49_319370	Exon (TGME49_319370-t26_1/TGME49_319370	106	TGME49_209290	206
TGME49_282210	Promoter (<=1kb)	1132	1047	TGME49_209170	Promoter (<=1kb)	259	738	TGME49_301280	Exon (TGME49_301270-t26_1/TGME49_301270	185	TGME49_209450	343
TGME49_214430	Promoter (<=1kb)	1365	1193	TGME49_202490	Promoter (<=1kb)	126	712	TGME49_290300	Exon (TGME49_290290-t26_1/TGME49_290290	148	TGME49_209500	170
TGME49_245980	Promoter (<=1kb)	972	948	TGME49_245680	Promoter (<=1kb)	134	265	TGME49_262780	Exon (TGME49_262780-t26_1/TGME49_262780	265	TGME49_209890	231
TGME49_227090	Promoter (<=1kb)	433	189	TGME49_266950	Promoter (<=1kb)	270	2339	TGME49_232250	Exon (TGME49_232250-t26_1/TGME49_232250	357	TGME49_209910	264
TGME49_249040	Promoter (<=1kb)	993	766	TGME49_246170	5' UTR	508	530	TGME49_259115	Exon (TGME49_259115-t26_1/TGME49_259115	264	TGME49_209920	201
TGME49_221410	Promoter (<=1kb)	790	561	TGME49_244040	Promoter (<=1kb)	151	207	TGME49_222960	Intron (TGME49_222960-t26_1/TGME49_222960	228	TGME49_209960	299
TGME49_291910	Promoter (<=1kb)	361	509	TGME49_253910	Promoter (<=1kb)	98	180	TGME49_222120	Intron (TGME49_222120-t26_1/TGME49_222120	313	TGME49_209970	198
TGME49_260600	Promoter (<=1kb)	1986	656	TGME49_305630	Promoter (<=1kb)	253	562	TGME49_231900	Exon (TGME49_231900-t26_1/TGME49_231900	99	TGME49_210310	139
TGME49_257670	Promoter (<=1kb)	424	702	TGME49_219260	Promoter (<=1kb)	137	514	TGME49_217220	Exon (TGME49_217182-t26_1/TGME49_217182	182	TGME49_210370	446
TGME49_212900	Promoter (<=1kb)	505	236	TGME49_321440	Promoter (<=1kb)	112	620	TGME49_212820	Exon (TGME49_212810-t26_1/TGME49_212810	83	TGME49_210408	321
TGME49_248270	Promoter (1-2kb)	463	210	TGME49_314220	Promoter (<=1kb)	332	2226	TGME49_305870	Exon (TGME49_305860-t26_1/TGME49_305860	607	TGME49_210430	190
TGME49_226250	Promoter (<=1kb)	797	326	TGME49_219800	Promoter (<=1kb)	143	529	TGME49_253600	Exon (TGME49_253615-t26_1/TGME49_253615	214	TGME49_210450	116
TGME49_229730	Promoter (<=1kb)	792	1212	TGME49_237460	Promoter (<=1kb)	356	637	TGME49_229640	Exon (TGME49_229630-t26_1/TGME49_229630	310	TGME49_210820	233
TGME49_300140	Promoter (<=1kb)	1613	1618	TGME49_309210	Promoter (1-2kb)	190	249	TGME49_268380	Exon (TGME49_268370-t26_1/TGME49_268370	66	TGME49_211030	172
TGME49_223080	Promoter (<=1kb)	534	660	TGME49_295000	Promoter (<=1kb)	106	207	TGME49_228110	Exon (TGME49_228100-t26_1/TGME49_228100	130	TGME49_211220	198
TGME49_239270	Promoter (1-2kb)	447	430	TGME49_320170	Promoter (<=1kb)	353	594	TGME49_214300	Intron (TGME49_214300-t26_1/TGME49_214300	65	TGME49_211340	179
TGME49_215775	Promoter (<=1kb)	480	461	TGME49_257960	Promoter (<=1kb)	173	424	TGME49_292020	Intron (TGME49_292020-t26_1/TGME49_292020	160	TGME49_211630	70
TGME49_271190	Promoter (<=1kb)	797	1107	TGME49_229770	Promoter (<=1kb)	518	511	TGME49_298010	Intron (TGME49_298010-t26_1/TGME49_298010	80	TGME49_211670	274
TGME49_249850	Promoter (<=1kb)	615	498	TGME49_312570	Promoter (<=1kb)	186	547	TGME49_213920	Exon (TGME49_213920-t26_1/TGME49_213920	67	TGME49_211680	456
TGME49_246140	Promoter (<=1kb)	982	697	TGME49_205190	Promoter (<=1kb)	189	376	TGME49_255390	Exon (TGME49_255390-t26_1/TGME49_255390	284	TGME49_211720	358
TGME49_203705	Promoter (<=1kb)	2276	604	TGME49_250100	Promoter (<=1kb)	132	416	TGME49_215290	Exon (TGME49_215290-t26_1/TGME49_215290	273	TGME49_212160	87
TGME49_299020	Promoter (<=1kb)	443	594	TGME49_229180	Promoter (<=1kb)	123	310	TGME49_269930	Intron (TGME49_269930-t26_1/TGME49_269930	265	TGME49_212190	165
TGME49_281660	Promoter (<=1kb)	748	310	TGME49_230480	Promoter (<=1kb)	429	2622	TGME49_216785	Intron (TGME49_216780-t26_1/TGME49_216780	56	TGME49_212190	509
TGME49_226565	Promoter (<=1kb)	951	402	TGME49_286150	Promoter (<=1kb)	100	343	TGME49_291120	Exon (TGME49_291120-t26_1/TGME49_291120	78	TGME49_212270	1074
TGME49_235635	Promoter (<=1kb)	824	815	TGME49_311260	Promoter (<=1kb)	319	365	TGME49_313440	Exon (TGME49_313430-t26_1/TGME49_313430	254	TGME49_212980	239
TGME49_281400	Exon (TGME49_281400-t26_1/TGME49_281400	1647	334	TGME49_306190	Promoter (<=1kb)	147	671	TGME49_237870	Intron (TGME49_237870-t26_1/TGME49_237870	159	TGME49_212990	315
TGME49_218362	Promoter (<=1kb)	1386	842	TGME49_301440	Promoter (1-2kb)	176	550	TGME49_305610	Exon (TGME49_305610-t26_1/TGME49_305610	186	TGME49_213040	648
TGME49_249370	Promoter (<=1kb)	506	299	TGME49_240090	Promoter (<=1kb)	288	604	TGME49_239475	Exon (TGME49_239475-t26_1/TGME49_239475	95	TGME49_213050	356
TGME49_302055	Promoter (<=1kb)	87	49	TGME49_309590	Promoter (<=1kb)	113	336	TGME49_291020	Exon (TGME49_291020-t26_1/TGME49_291020	33	TGME49_213460	131
TGME49_314450	Promoter (<=1kb)	1361	1487	TGME49_208430	Promoter (<=1kb)	309	1023	TGME49_223060	Exon (TGME49_223060-t26_1/TGME49_223060	244	TGME49_213520	467
TGME49_294820	Promoter (1-2kb)	1348	210	TGME49_311160	Promoter (<=1kb)	151	313	TGME49_290630	Exon (TGME49_290630-t26_1/TGME49_290630	128	TGME49_213660	361
TGME49_254890	Promoter (<=1kb)	439	335	TGME49_205280	Promoter (<=1kb)	375	2303	TGME49_239010	Intron (TGME49_239020-t26_1/TGME49_239020	78	TGME49_213660	810
TGME49_272710	Promoter (1-2kb)	502	397	TGME49_244120	Promoter (<=1kb)	129	806	TGME49_202950	Exon (TGME49_202970-t26_1/TGME49_202970	197	TGME49_213710	253
TGME49_294970	Promoter (<=1kb)	1333	1200	TGME49_238850	Promoter (<=1kb)	170	489	TGME49_238200	Exon (TGME49_238190-t26_1/TGME49_238190	322	TGME49_213800	250
TGME49_301480	Promoter (<=1kb)	340	361	TGME49_217951	Distal Intergenic	62	667	TGME49_277500	Exon (TGME49_277500-t26_1/TGME49_277500	97	TGME49_214130	422
TGME49_232660	Promoter (<=1kb)	597	262	TGME49_314970	Promoter (<=1kb)	103	210	TGME49_249150	Exon (TGME49_249150-t26_1/TGME49_249150	198	TGME49_214140	67
TGME49_314700	Promoter (<=1kb)	1560	1861	TGME49_223060	Promoter (<=1kb)	274	335	TGME49_201700	Exon (TGME49_201690-t26_1/TGME49_201690	365	TGME49_214140	1075
TGME49_262620	Promoter (<=1kb)	710	732	TGME49_267140	Promoter (<=1kb)	104	434	TGME49_305160	Exon (TGME49_305150-t26_1/TGME49_305150	170	TGME49_214180	293
TGME49_261240	Promoter (<=1kb)	2600	894	TGME49_271320	Promoter (<=1kb)	174	411	TGME49_275802	Exon (TGME49_275802-t26_1/TGME49_275802	37	TGME49_214190	167
TGME49_215890	3' UTR	261	882	TGME49_231190	Promoter (<=1kb)	139	684	TGME49_218720	Intron (TGME49_218720-t26_1/TGME49_218720	355	TGME49_214260	33
TGME49_203300	Promoter (<=1kb)	1028	424	TGME49_252870	Promoter (<=1kb)	146	419	TGME49_248500	Exon (TGME49_248510-t26_1/TGME49_248510	91	TGME49_214270	675
TGME49_208020	Promoter (1-2kb)	1132	371	TGME49_211610	Promoter (<=1kb)	160	239	TGME49_260470	Exon (TGME49_260470-t26_1/TGME49_260470	243	TGME49_214410	212
TGME49_204330	Promoter (<=1kb)	477	468	TGME49_225930	Promoter (<=1kb)	305	723	TGME49_210235	Exon (TGME49_210245-t26_1/TGME49_210245	149	TGME49_214430	39
TGME49_289910	Promoter (<=1kb)	204	1224	TGME49_207403	Promoter (<=1kb)	95	429	TGME49_247040	Exon (TGME49_247040-t26_1/TGME49_247040	147	TGME49_214440	636
TGME49_278380	Promoter (<=1kb)	318	196	TGME49_232780	Promoter (<=1kb)	164	654	TGME49_310130	Exon (TGME49_310130-t26_1/TGME49_310130	162	TGME49_214520	156
TGME49_214420	Promoter (<=1kb)	508	400	TGME49_227150	Promoter (<=1kb)	154	603	TGME49_292100	Exon (TGME49_292080-t26_1/TGME49_292080	49	TGME49_214530	29
TGME49_219800	Promoter (<=1kb)	83	142	TGME49_289745	Promoter (<=1kb)	159	612	TGME49_276200	Exon (TGME49_276200-t26_1/TGME49_276200	119	TGME49_214750	192
TGME49_206510	Promoter (<=1kb)	456	563	TGME49_209260	Promoter (<=1kb)	183	612	TGME49_290630	Exon (TGME49_290630-t26_1/TGME49_290630	248	TGME49_214820	394
TGME49_222050	Promoter (<=1kb)	867	401	TGME49_276140	Promoter (<=1kb)	408	740	TGME49_306338	Exon (TGME49_306338-t26_1/TGME49_306338	241	TGME49_214840	750
TGME49_243465	Promoter (1-2kb)	1039	1264	TGME49_309570	Promoter (<=1kb)	303	499	TGME49_223270	Intron (TGME49_223270-t26_1/TGME49_223270	97	TGME49_214880	670
TGME49_313250	Promoter (1-2kb)	652	255	TGME49_222350	Promoter (<=1kb)	187	924	TGME49_217010	Exon (TGME49_217010-t26_1/TGME49_217010	200	TGME49_214950	171
TGME49_320050	Promoter (<=1kb)	605	759	TGME49_236153	Promoter (<=1kb)	113	405	TGME49_211610	Intron (TGME49_211480-t26_1/TGME49_211480	20	TGME49_215010	257
TGME49_224850	5' UTR	507	627	TGME49_293650	Promoter (<=1kb)	1466	556	TGME49_223270	Exon (TGME49_223270-t26_1/TGME49_223270	104	TGME49_215060	246
TGME49_249890	Promoter (<=1kb)	566	569	TGME49_294940	Promoter (<=1kb)	180	951	TGME49_263100	Exon (TGME49_263100-t26_1/TGME49_263100	230	TGME49_215140	256
TGME49_219070	Distal Intergenic	446	575	TGME49_270380	Promoter (<=1kb)	152	479	TGME49_300310	Exon (TGME49_300310-t26_1/TGME49_300310	149	TGME49_215160	641
TGME49_245770	Promoter (<=1kb)	463	156	TGME49_261600	Promoter (<=1kb)	87	232	TGME49_223270	Exon (TGME49_223270-t26_1/TGME49_223270	45	TGME49_215510	170
TGME49_294830	Promoter (<=1kb)	977	566	TGME49_301210	Promoter (<=1kb)	199	346	TGME49_291970	Exon (TGME49_291960-t26_1/TGME49_291960	115	TGME49_215520	259
TGME49_295430	Promoter (<=1kb)	1007	315	TGME49_232560	Promoter (<=1kb)	99	1252	TGME49_233080	Exon (TGME49_233065-t26_1/TGME49_233065	169	TGME49_215640	440
TGME49_238050	Promoter (<=1kb)	1147	1140	TGME49_270750	Promoter (1-2kb)	126	171	TGME49_290660	Exon (TGME49_290660-t26_1/TGME49_290660	198	TGME49_215680	310
TGME49_244700	Intron (TGME49_244700-t26_1/TGME49_244700	168	165	TGME49_208790	Promoter (<=1kb)	151	924	TGME49_207830	Intron (TGME49_207830-t26_1/TGME49_207830	122	TGME49_215785	91
TGME49_294330	Promoter (<=1kb)	304	165	TGME49_273750	Promoter (1-2kb)	154	184	TGME49_275670	Exon (TGME49_275670-t26_1/TGME49_275670	450	TGME49_215895	1097
TGME49_288650	Promoter (<=1kb)	801	274	TGME49_314280	Promoter (1-2kb)	298	189	TGME49_211690	Exon (TGME49_211690-t26_1/TGME49_211690	80	TGME49_215895	584
TGME49_218590	Distal Intergenic	1513	882	TGME49_268280	Promoter (<=1kb)	102	795	TGME49_285820	Intron (TGME49_285810-t26_1/TGME49_285810	215	TGME49_216053	110
TGME49_281430	Distal Intergenic	1269	365	TGME49_288680	Promoter (<=1kb)	209	335	TGME49_281420	Exon (TGME49_281420-t26_1/TGME49_281420	83	TGME49_216290	99
TGME49_309990	Promoter (<=1kb)	792	465	TGME49_238490	Promoter (<=1kb)	301	1060	TGME49_251510	Exon (TGME49_251510-t26_1/TGME49_251510	293	TGME49_216290	602
TGME49_273650	Promoter (<=1kb)	1724	802	TGME49_258225	Promoter (<=1kb)	201	552	TGME49_319910	Intron (TGME49_319910-t26_1/TGME49_319910	119	TGME49_216460	390
TGME49_219660	Promoter (<=1kb)	848	1087	TGME49_208030	Promoter (<=1kb)	183	516	TGME49_310620	Exon (TGME49_310620-t26_1/TGME49_310620	276	TGME49_216650	1105
TGME49_230940	Promoter (<=1kb)	440	193	TGME49_213800	Promoter (<=1kb)	99	305	TGME49_207875	Exon (TGME49_207865-t26_1/TGME49_207865	513	TGME49_216820	12
TGME49_212770	Promoter (<=1kb)	380	170	TGME49_209910	Promoter (<=1kb)	446	494	TGME49_212260	Exon (TGME49_212250-t26_1/TGME49_212250	76	TGME49_216880	933
TGME49_214140	5' UTR	627	308	TGME49_238010	Distal Intergenic	109	381	TGME49_312850	Exon (TGME49_312860-t26_1/TGME49_312860	131	TGME49_217410	88
TGME49_315610	Promoter (<=1kb)	989	1108	TGME49_242640	Promoter (<=1kb)	82	392	TGME49_281590	Exon (TGME49_281580-t26_1/TGME49_281580	160	TGME49_217480	300
TGME49_255220	Promoter (1-2kb)	1217	223	TGME49_299180	Promoter (<=1kb)	176	347	TGME49_309930	Intron (TGME49_309930-t26_1/TGME49_309930	94	TGME49_217640	341
TGME49_269310	Promoter (<=1kb)	793	530	TGME49_249030	Promoter (<=1kb)	200	646	TGME49_239410	Exon (TGME49_239410-t26_1/TGME49_239410	218	TGME49_217660	184
TGME49_355010	Promoter (<=1kb)	149	252	TGME49_213890	Promoter (<=1kb)	146	275	TGME49_236080	Intron (TGME49_236080-t26_1/TGME49_236080	174	TGME49_217890	861
TGME49_232550	Promoter (<=1kb)	228	228	TGME49_309800	Promoter (<=1kb)	103	230	TGME49_310270	Exon (TGME49_310270-t26_1/TGME49_310270	75	TGME49_217961	584
TGME49_320250	Promoter (<=1kb)	587	532	TGME49_310670	Promoter (<=1kb)	139	829	TGME49_219700	Intron (TGME49_219700-t26_1/TGME49_219700	198	TGME49_218250	317
TGME49_318160	Promoter (<=1kb)	207	176	TGME49_243930	Promoter (<=1kb)	480	915	TGME49_210740	Intron (TGME49_210730-t26_1/TGME49_210730	41	TGME49_218300	420
TGME49_266600	Promoter (<=1kb)	552	78	TGME49_207600	Promoter (<=1kb)	70	1623	TGME49_275310	Exon (TGME49_275320-t26_1/TGME49_275320	350	TGME49_218300	145
TGME49_311190	Promoter (<=1kb)	324	431	TGME49_276920	Promoter (<=1kb)	543	2301	TGME49_315460	Intron (TGME49_315460-t26_1/TGME49_315460	244	TGME49_218470	202
TGME49_268020	Exon (TGME49_268020-t26_1/TGME49_268020	918	297	TGME49_237425	Promoter (1-2kb)	105	344	TGME49_270865	Exon (TGME49_270865-t26_1/TGME49_270865	127	TGME49_218550	885
TGME49_300700	Promoter (<=1kb)	314	266	TGME49_220100	Promoter (<=1kb)	116	357	TGME49_260490	Exon (TGME49_260490-t26_1/TGME49_260490	77	TGME49_218910	407
TGME49_266090	Promoter (<=1kb)	1140	846	TGME49_208020	Promoter (<=1kb)	281	816	TGME49_218400	Exon (TGME49_218400-t26_1/TGME49_218400	165	TGME49_218920	168
TGME49_288370	Promoter (<=1kb)	515	238	TGME49_285860	Promoter (<=1kb)	316	487	TGME49_203540	Exon (TGME49_203520-t26_1/TGME49_203520	258	TGME49_218950	448
TGME49_219120	Promoter (<=1kb)	754	604	TGME49_259550	Promoter (<=1kb)	99	428	TGME49_257510	Exon (TGME49_257510-t26_1/TGME49_257510	149	TGME49_219600	560
TGME49_200310	Promoter (<=1kb)	1051	249	TGME49_223140	Distal Intergenic	178	107	TGME49_297100	Intron (TGME49_297110-t26_1/TGME49_297110	209	TGME49_219700	194
TGME49_240060	Promoter (<=1kb)	274	835	TGME49_304870	Distal Intergenic	1847	884	TGME49_201140	Exon (TGME49_201150-t26_1/TGME49_201150	128	TGME49_219710	405
TGME49_203290	Promoter (1-2kb)	623	166	TGME49_287470	Distal Intergenic	37	384	TGME49_207900	Exon (TGME49_207880-t26_1/TGME49_207880	227	TGME49_219720	154
TGME49_251690	Promoter (<=1kb)	584	179	TGME49_275470	Promoter (<=1kb)	128	296	TGME49_283900	Exon (TGME49_283900-t26_1/TGME49_283900	281	TGME49_219820	30
TGME49_226450	Promoter (<=1kb)	827	386	TGME49_297245	Promoter (<=1kb)	115	447	TGME49_293360	Exon (TGME49_293370-t26_1/TGME49_293370	55	TGME49_220110	255
TGME49_250800	Promoter (<=1kb)	1053	353	TGME49_236140	Promoter (<=1kb)	140	433	TGME49_218210	Intron (TGME49_218210-t26_1/TGME49_218210	238	TGME49_220240	580
TGME49_250100	Promoter (<=1kb)	285	84	TGME49_278290	Promoter (<=1kb)	363	645	TGME49_258770	Exon (TGME49_258770-t26_1/TGME49_258770	159	TGME49_220270	354
TGME49_279315	Promoter (<=1kb)	552	373	TGME49_280510	Promoter (<=1kb)	58	346	TGME49_222800	Exon (TGME49_222800-t26_1/TGME49_222800	369	TGME49_220330	165
TGME49_300130	Promoter (<=1kb)	419	813	TGME49_244470	Promoter (<=1kb)	103	823	TGME49_265150	Exon (TGME49_265150-t26_1/TGME49_265150	388	TGME49_220360	62
TGME49_284310	Distal Intergenic	137	255	TGME49_218358	Promoter (<=1kb)	133	416	TGME49_239930	Exon (TGME49_240050-t26_1/TGME49_240050	266	TGME49_220370	157
TGME49_261990	Promoter (<=1kb)	340	340	TGME49_242600	Distal Intergenic	195	207	TGME49_230490	Exon (TGME49_230490-t26_1/TGME49_230490	36	TGME49_220370	178
TGME49_214410	Promoter (1-2kb)	258	337	TGME49_305330	Promoter (<=1kb)	229	1078	TGME49_214300	Intron (TGME49_214300-t26_1/TGME49_214300	170	TGME49_220440	338
TGME49_288950	Promoter (<=1kb)	604	279	TGME49_255175	Promoter (1-2kb)	112	391	TGME49_214600	Intron (TGME49_214600-t26_1/TGME49_214600	86	TGME49_220470	40
TGME49_215980	Promoter (<=1kb)	329	762	TGME49_217020	Exon (TGME49_217020-t26_1/TGME49_217020	300	498	TGME49_247250	Exon (TGME49_247250-t26_1/TGME49_247250	400	TGME49_220640	280
TGME49_289920	Promoter (<=1kb)	1857	952	TGME49_203200	Exon (TGME49_203200-t26_1/TGME49_203200	246	373	TGME49_208910	Exon (TGME49_208910-t26_1/TGME49_208910	97	TGME49_220740	88
TGME49_269050	Promoter (<=1kb)	302	231	TGME49_226072	Exon (TGME49_226068-t26_1/TGME49_226068	188	368	TGME49_266410	Exon (TGME49_266435-t26_1/TGME49_266435	59	TGME49_221250	154
TGME49_314220	Promoter (<=1kb)	1545	1412	TGME49_202770	Exon (TGME49_202770-t26_1/TGME49_202770	308	369	TGME49_306320	Exon (TGME49_306320-t26_1/TGME49_306320	50	TGME49_221260	449
TGME49_264260	Distal Intergenic	180	163	TGME49_281400	Exon (TGME49_281400-t26_1/TGME49_281400	2743	794	TGME49_278640	Exon (TGME49_278630-t26_1/TGME49_278630	234	TGME49_221270	391
TGME49_267370	Promoter (<=1kb)	1043	253	TGME49_301260	Exon (TGME49_301270-t26_1/TGME49_301270	540	435	TGME49_276890	Intron (TGME49_276890-t26_1/TGME49_276890	361	TGME49_221320	1223
TGME49_251530	Promoter (<=1kb)	466	894	TGME49_289340	Exon (TGME49_289330-t26_1/TGME49_289330	225	316	TGME49_283710	Exon (TGME49_283702-t26_1/TGME49_283702	75	TGME49_221340	70
TGME49_316400	Promoter (<=1kb)	583	98	TGME49_213890	Exon (TGME49_213890-t26_1/TGME49_213890	648	721	TGME49_237425	Exon (TGME49_237425-t26_1/TGME49_237425	119	TGME49_221380	196
TGME49_226950	Promoter (<=1kb)	1162	982	TGME49_290660	Exon (TGME49_290660-t26_1/TGME49_290660	238	286	TGME49_275740	Exon (TGME49_275740-t26_1/TGME49_275740	171	TGME49_221400	261
TGME49_236970	Promoter (<=1kb)	930	506	TGME49_319580	Exon (TGME49_319580-t26_1/TGME49_319580	687	280	TGME49_314482	Exon (TGME49_314480-t26_1/TGME49_314480	163	TGME49_221480	451
TGME49_277070	Promoter (<=1kb)	1590	299	TGME49_234980	Exon (TGME49_234980-t26_1/TGME49_234980	207	351	TGME49_297780	Exon (TGME49_297780-t26_1/TGME49_297780	404	TGME49_221560	132
TGME49_211680	Promoter (<=1kb)	161	439	TGME49_305610	Exon (TGME49_305610-t26_1/TGME49_305610	295	349	TGME49_283702	Exon (TGME49_283702-t26_1/TGME49_283702	529	TGME49_221585	173
TGME49_263090	Promoter (<=1kb)	641	551	TGME49_219440	Exon (TGME49_219440-t26_1/TGME49_219440	426	396	TGME49_241140	Exon (TGME49_241140-t26_1/TGME49_241140	39	TGME49_221610	105
TGME49_287235	3' UTR	185	300	TGME49_215690	Exon (TGME49_215700-t26_1/TGME49_215700	426	393	TGME49_242435	Exon (TGME49_242435-t26_1/TGME49_242435	62	TGME49_221620	486
TGME49_300618	Promoter (<=1kb)	310	19	TGME49_254950	Exon (TGME49_254940-t26_1/TGME49_254940	281	310	TGME49_203180	Exon (TGME49_203180-t26_1/TGME49_203180	259	TGME49_221675	78
TGME49_245460	Promoter (<=1kb)	798	534	TGME49_293370	Intron (TGME49_293370-t26_1/TGME49_293370	623	729	TGME49_224270	Exon (TGME49_224260-t26_1/TGME49_224260	100	TGME49_221990	259
TGME49_258840	Promoter (<=1kb)	420	401	TGME49_293320	Exon (TGME49_293320-t26_1/TGME49_293320	200	346	TGME49_216610	Exon (TGME49_216600-t26_1/TGME49_216600	56	TGME49_222020	166
TGME49_267980	Promoter (<=1kb)	1181	953	TGME49_226650	Exon (TGME49_226660-t26_1/TGME49_226660	1268	1301	TGME49_241150	Exon (TGME49_241150-t26_1/TGME49_241150	188	TGME49_222030	618
TGME49_279100	Promoter (<=1kb)	948	1643	TGME49_316650	Exon (TGME49_316650-t26_1/TGME49_316650	467	609	TGME49_240870	Intron (TGME49_240870-t26_1/TGME49_240870	263	TGME49_222050	1204
TGME49_257090	Promoter (<=1kb)	327	412	TGME49_320010	Exon (TGME49_320010-t26_1/TGME49_320010	433	420	TGME49_234230	Exon (TGME49_234250-t26_1/TGME49_234250	494	TGME49_222100	190
TGME49_309195	Promoter (<=1kb)	854	756	TGME49_310750	Exon (TGME49_310750-t26_1/TGME49_310750	214	489	TGME49_226740	Exon (TGME49_226740-t26_1/TGME49_226740	254	TGME49_222220	1010
TGME49_238140	Promoter (<=1kb)	305	503	TGME49_268250	Exon (TGME49_268250-t26_1/TGME49_268250	636	727	TGME49_221200	Exon (TGME49_221200-t26_1/TGME49_221200	113	TGME49_222230	207
TGME49_203060	Promoter (<=1kb)	1060	419	TGME49_305190	Exon (TGME49_305190-t26_1/TGME49_305190	409	320	TGME49_305040	Exon (TGME49_305040-t26_1/TGME49_305040	160	TGME49_222380	103
TGME49_278870	Promoter (<=1kb)	309	333	TGME49_254555	Exon (TGME49_254555-t26_1/TGME49_254555	246	270	TGME49_310530	Exon (TGME49_310530-t26_1/TGME49_310530	53	TGME49_222380	172
TGME49_318470	Promoter (<=1kb)	541	361	TGME49_233080	Exon (TGME49_233080-t26_1/TGME49_233080	444	357	TGME49_218400	Exon (TGME49_218400-t26_1/TGME49_218400	200	TGME49_222710	405
TGME49_320240	Promoter (<=1kb)	550	618	TGME49_242780	Exon (TGME49_242780-t26_1/TGME49_242780	251	479	TGME49_278780	Exon (TGME49_278780-t26_1/TGME49_278780	174	TGME49_222920	159
TGME49_270890	Promoter (<=1kb)	203	185	TGME49_233500	Exon (TGME49_233500-t26_1/TGME49_233500	167	777	TGME49_307650	Exon (TGME49_307650-t26_1/TGME49_307650	16	TGME49_222930	402
TGME49_219270	Promoter (<=1kb)	258	107	TGME49_202840	Exon (TGME49_202840-t26_1/TGME49_202840	298	1022	TGME49_220920	Exon (TGME49_220920-t26_1/TGME49_220920	174	TGME49_222930	129
TGME49_253790	Promoter (<=1kb)	751	722	TGME49_250750	Exon (TGME49_250750-t26_1/TGME49_250750	493	232	TGME49_267020	Intron (TGME49_267030-t26_1/TGME49_267030	134	TGME49_223030	8
TGME49_212210	Promoter (<=1kb)	226	194	TGME49_275480	Exon (TGME49_275490-t26_1/TGME49_275490	483	298	TGME49_286790	Exon (TGME49_286790-t26_1/TGME49_286790	25	TGME49_223070	45
TGME49_200385	Promoter (1-2kb)	1021	793	TGME49_263740	Exon (TGME49_263740-t26_1/TGME49_263740	196	732	TGME49_262380	Exon (TGME49_262390-t26_1/TGME49_262390	317	TGME49_223080	690
TGME49_243570	Promoter (<=1kb)	138	658	TGME49_233160	Exon (TGME49_233160-t26_1/TGME49_233160	273	838	TGME49_235402	Exon (TGME49_235420-t26_1/TGME49_235420	80	TGME49_223150	223
TGME49_284180	Promoter (1-2kb)	1058	701	TGME49_315885	Exon (TGME49_315860-t26_1/TGME49_315860	231	287	TGME49_245740	Intron (TGME49_245730-t26_1/TGME49_245730	257	TGME49_223258	420
TGME49_314430	Promoter (<=1kb)	1178	173	TGME49_239410	Exon (TGME49_239410-t26_1/TGME49_239410	519	416	TGME49_251950	Intron (TGME49_251950-t26_1/TGME49_251950	118	TGME49_223262	232
TGME49_224460	Promoter (<=1kb)	1755	349	TGME49_268200	Exon (TGME49_268200-t26_1/TGME49_268200	317	630	TGME49_289100	Exon (TGME49_289100-t26_1/TGME49_289100	19	TGME49_223440	421
TGME49_318675	Promoter (<=1kb)	299	439	TGME49_209280	Exon (TGME49_209280-t26_1/TGME49_209280	232	287	TGME49_225730	Exon (TGME49_225745-t26_1/TGME49_225745	66	TGME49_223440	32
TGME49_309890	Promoter (<=1kb)	286	280	TGME49_304755	Exon (TGME49_304760-t26_1/TGME49_304760	250	292	TGME49_202240	Exon (TGME49_202240-t26_1/TGME49_202240	231	TGME49_223650	711
TGME49_234690	Promoter (<=1kb)	678	2454	TGME49_291180	Exon (TGME49_291180-t26_1/TGME49_291180	207	184	TGME49_309980	Intron (TGME49_309980-t26_1/TGME49_309980	41	TGME49_223700	442
TGME49_305170	Promoter (<=1kb)	1158	522	TGME49_281640	Exon (TGME49_281640-t26_1/TGME49_281640	232	269	TGME49_305320	Exon (TGME49_305320-t26_1/TGME49_305320	226	TGME49_223810	616
TGME49_245485	Promoter (<=1kb)	521	710	TGME49_310620	Exon (TGME49_310620-t26_1/TGME49_310620	240	350	TGME49_226755	Exon (TGME49_226755-t26_1/TGME49_226755	45	TGME49_223930	119
TGME49_225230	Promoter (<=1kb)	1736	489	TGME49_268280	Intron (TGME49_268280-t26_1/TGME49_268280	160	282	TGME49_287040	Exon (TGME49_286932-t26_1/TGME49_286932	78	TGME49_223930	188
TGME49_272370	Promoter (<=1kb)	838	156	TGME49_264140	Exon (TGME49_264140-t26_1/TGME49_264140	458	866	TGME49_224845	Exon (TGME49_224840-t26_1/TGME49_224840	234	TGME49_223940	467
TGME49_293260	Promoter (<=1kb)	399	260	TGME49_214835	Exon (TGME49_214840-t26_1/TGME49_214840	541	576	TGME49_270840	Exon (TGME49_270840-t26_1/TGME49_270840	15	TGME49_224000	198
TGME49_201380	Promoter (<=1kb)	1248	369	TGME49_235420	Exon (TGME49_235420-t26_1/TGME49_235420	317	321	TGME49_242625	Exon (TGME49_242625-t26_1/TGME49_242625	140	TGME49_224130	620
TGME49_294200	Promoter (<=1kb)	180	44	TGME49_214740	Exon (TGME49_214740-t26_1/TGME49_214740	369	561	TGME49_243590	Exon (TGME49_243590-t26_1/TGME49_243590	334	TGME49_224140	55
TGME49_207965	Promoter (<=1kb)	782	270	TGME49_265250	Exon (TGME49_265250-t26_1/TGME49_265250	663	834	TGME49_221200	Exon (TGME49_221200-t26_1/TGME49_221200	179	TGME49_224230	112
TGME49_203815	Distal Intergenic	287	419	TGME49_295720	Exon (TGME49_295710-t26_1/TGME49_295710	575	342	TGME49_314410	Intron (TGME49_314410-t26_1/TGME49_314410	236	TGME49_224250	1303
TGME49_295340	Promoter (<=1kb)	834	187	TGME49_238390	Exon (TGME49_238390-t26_1/TGME49_238390	225	402	TGME49_274020	Exon (TGME49_274020-t26_1/TGME49_274020	361	TGME49_224290	677
TGME49_269700	Promoter (<=1kb)	383	364	TGME49_310180	Exon (TGME49_310190-t26_1/TGME49_310190	246	258	TGME49_269190	Exon (TGME49_269180-t26_1/TGME49_269180	40	TGME49_224350	841
TGME49_239810	Promoter (<=1kb)	1010	1016	TGME49_313495	Exon (TGME49_313495-t26_1/TGME49_313495	171	263	TGME49_289780	Exon (TGME49_289780-t26_1/TGME49_289780	5	TGME49_224350	130
TGME49_269620	Promoter (1-2kb)	781	557	TGME49_226755	Exon (TGME49_226755-t26_1/TGME49_226755	236	580	TGME49_232370	Exon (TGME49_232380-t26_1/TGME49_232380	301	TGME49_224480	418
TGME49_249180	3' UTR	378	566	TGME49_312930	Exon (TGME49_312905-t26_1/TGME49_312905	185	761	TGME49_229280	Exon (TGME49_229290-t26_1/TGME49_229290	292	TGME49_224540	137
TGME49_215343	Promoter (<=1kb)	23	194	TGME49_246170	Exon (TGME49_246170-t26_1/TGME49_246170	450	342	TGME49_254555	Exon (TGME49_254555-t26_1/TGME49_254555	236	TGME49_224630	51
TGME49_264160	Promoter (<=1kb)	493	185	TGME49_229180	Exon (TGME49_229180-t26_1/TGME49_229180	324	247	TGME49_244040	Intron (TGME49_244040-t26_1/TGME49_244040	21	TGME49_224700	266
TGME49_208480	Promoter (<=1kb)	72	249	TGME49_209112	Exon (TGME49_209130-t26_1/TGME49_209130	315	412	TGME49_261610	Exon (TGME49_261610-t26_1/TGME49_261610	224	TGME49_224850	281
TGME49_205320	Promoter (<=1kb)	1855	440	TGME49_246490	Exon (TGME49_246500-t26_1/TGME49_246500	281	342	TGME49_227290	Exon (TGME49_227300-t26_1/TGME49_227300	393	TGME49_224890	168
TGME49_246070	Promoter (<=1kb)	236	250	TGME49_224270	Exon (TGME49_224270-t26_1/TGME49_224270	181	293	TGME49_312050	Intron (TGME49_312065-t26_1/TGME49_312065	273	TGME49_224935	619
TGME49_247300	Promoter (<=1kb)	709	272	TGME49_267720	Exon (TGME49_267720-t26_1/TGME49_267720	492	568	TGME49_245540	Exon (TGME49_245530-t26_1/TGME49_245530	109	TGME49_224970	209
TGME49_315950	Promoter (<=1kb)	902	843	TGME49_306020	Exon (TGME49_306020-t26_1/TGME49_306020	294	261	TGME49_294830	Exon (TGME49_294820-t26_1/TGME49_294820	329	TGME49_225010	15
TGME49_257430	Promoter (<=1kb)	348	146	TGME49_255860	Intron (TGME49_255740-t26_1/TGME49_255740	213	466	TGME49_240650	Exon (TGME49_240650-t26_1/TGME49_240650	7	TGME49_225110	639
TGME49_202620	Promoter (<=1kb)	410	227	TGME49_250770	Exon (TGME49_250780-t26_1/TGME49_250780	537	176	TGME49_242020	Exon (TGME49_242020-t26_1/TGME49_242020	284	TGME49_225170	127
TGME49_320210	Promoter (<=1kb)	560	215	TGME49_201700	Exon (TGME49_201700-t26_1/TGME49_201700	288	371	TGME49_215220	Exon (TGME49_215210-t26_1/TGME49_215210	243	TGME49_225240	352
TGME49_313010	Promoter (<=1kb)	827	69	TGME49_223262	Exon (TGME49_223262-t26_1/TGME49_223262	355	484	TGME49_210800	Intron (TGME49_210790-t26_1/TGME49_210790	277	TGME49_225260	168
TGME49_258410	Promoter (<=1kb)	1081	525	TGME49_234990	Exon (TGME49_234990-t26_1/TGME49_234990	188	235	TGME49_239475	Intron (TGME49_239480-t26_1/TGME49_239480	34	TGME49_225490	734
TGME49_293390	Promoter (<=1kb)	378	153	TGME49_249620	Exon (TGME49_249620-t26_1/TGME49_249620	188	245	TGME49_264420	Exon (TGME49_264420-t26_1/TGME49_264420	241	TGME49_225560	394
TGME49_257680	Exon (TGME49_257670-t26_1/TGME49_257670	1164	393	TGME49_273290	Exon (TGME49_273290-t26_1/TGME49_273290	256	203	TGME49_222385	Exon (TGME49_222385-t26_1/TGME49_222385	207	TGME49_225690	71
TGME49_232940	Promoter (<=1kb)	617	185	TGME49_226670	Exon (TGME49_226660-t26_1/TGME49_226660	138	236	TGME49_297940	Intron (TGME49_297960-t26_1/TGME49_297960	4	TGME49_225800	33
TGME49_225080	Promoter (<=1kb)	233	293	TGME49_237280	Exon (TGME49_237280-t26_1/TGME49_237280	312	259	TGME49_209450	Exon (TGME49_209450-t26_1/TGME49_209450	95	TGME49_225860	209
TGME49_258540	Promoter (<=1kb)	1016	204	TGME49_262710	Exon (TGME49_262700-t26_1/TGME49_262700	214	254	TGME49_267855	Exon (TGME49_267855-t26_1/TGME49_267855	303	TGME49_225920	447
TGME49_245432	Promoter (<=1kb)	578	204	TGME49_217670	Intron (TGME49_217670-t26_1/TGME49_217670	218	291	TGME49_261490	Exon (TGME49_261490-t26_1/TGME49_261490	264	TGME49_225940	174
TGME49_293440	Promoter (<=1kb)	696	50	TGME49_306480	Exon (TGME49_306480-t26_1/TGME49_306480	189	284	TGME49_216610	Intron (TGME49_216600-t26_1/TGME49_216600	4	TGME49_225955	228
TGME49_208722	Distal Intergenic	432	161	TGME49_218580	Exon (TGME49_218580-t26_1/TGME49_218580	252	194	TGME49_277940	Intron (TGME49_277930-t26_1/TGME49_277930	0	TGME49_226030	348
TGME49_218220	Promoter (<=1kb)	555	176	TGME49_248140	Exon (TGME49_248150-t26_1/TGME49_248150	175	200	TGME49_235640	Intron (TGME49_235640-t26_1/TGME49_235640	5	TGME49_226068	167
TGME49_240900	Promoter (1-2kb)	1114	418	TGME49_216785	Exon (TGME49_216780-t26_1/TGME49_216780	432	259	TGME49_219070	Exon (TGME49_218960-t26_1/TGME49_218960	16	TGME49_226220	32
TGME49_237800	Promoter (<=1kb)	1056	160	TGME49_270930	Exon (TGME49_270930-t26_1/TGME49_270930	162	165	TGME49_321610	Intron (TGME49_321620-t26_1/TGME49_321620	253	TGME49_226260	496
TGME49_306480	3' UTR	1140	265	TGME49_252450	Exon (TGME49_252430-t26_1/TGME49_252430	206	196	TGME49_219210	Exon (TGME49_219210-t26_1/TGME49_219210	37	TGME49_226290	206
TGME49_252220	Promoter (<=1kb)	527	446	TGME49_290710	Exon (TGME49_290720-t26_1/TGME49_290720	196	173	TGME49_217360	Exon (TGME49_217360-t26_1/TGME49_217360	21	TGME49_226290	28
TGME49_280460	Promoter (<=1kb)	1028	633	TGME49_311230	Exon (TGME49_311230-t26_1/TGME49_311230	127	110	TGME49_225260	Exon (TGME49_225260-t26_1/TGME49_225260	8	TGME49_226290	51
TGME49_300690	Promoter (<=1kb)	142	216	TGME49_207080	Exon (TGME49_207080-t26_1/TGME49_207080	158	349	TGME49_263060	Intron (TGME49_263060-t26_1/TGME49_263060	218	TGME49_226310	29
TGME49_218550	Promoter (<=1kb)	905	869	TGME49_263510	Exon (TGME49_263510-t26_1/TGME49_263510	201	221	TGME49_291180	Exon (TGME49_291180-t26_1/TGME49_291180	188	TGME49_226370	344
TGME49_273640	Promoter (<=1kb)	329	370	TGME49_316610	Exon (TGME49_316620-t26_1/TGME49_316620	221	271	TGME49_224180	Exon (TGME49_224180-t26_1/TGME49_224180	251	TGME49_226390	198
TGME49_253880	Promoter (<=1kb)	1835	279	TGME49_288930	Exon (TGME49_288930-t26_1/TGME49_288930	161	269	TGME49_215070	Exon (TGME49_215080-t26_1/TGME49_215080	252	TGME49_226410	221
TGME49_319370	Promoter (<=1kb)	386	396	TGME49_289570	Exon (TGME49_289570-t26_1/TGME49_289570	169	230	TGME49_264140	Exon (TGME49_264140-t26_1/TGME49_264140	219	TGME49_226550	396
TGME49_320680	Promoter (<=1kb)	1235	733	TGME49_234410	Exon (TGME49_234410-t26_1/TGME49_234410	792	1027	TGME49_289730	Exon (TGME49_289730-t26_1/TGME49_289730	244	TGME49_226590	254
TGME49_258470	Promoter (<=1kb)	366	225	TGME49_263595	Exon (TGME49_263610-t26_1/TGME49_263610	191	183	TGME49_305150	Exon (TGME49_305150-t26_1/TGME49_305150	15	TGME49_226590	414
TGME49_209180	Promoter (<=1kb)	1520	485	TGME49_313270	Exon (TGME49_313270-t26_1/TGME49_313270	308	524	TGME49_227060	Exon (TGME49_227060-t26_1/TGME49_227060	233	TGME49_226720	9
TGME49_278380	Promoter (<=1kb)	154	162	TGME49_218570	Exon (TGME49_218560-t26_1/TGME49_218560	376	472	TGME49_230460	Intron (TGME49_230460-t26_1/TGME49_230460	273	TGME49_226720	94
TGME49_250760	Promoter (<=1kb)	861	236	TGME49_295720	Exon (TGME49_295710-t26_1/TGME49_295710	188	197	TGME49_257670	Promoter (<=1kb)	711	TGME49_226900	171
TGME49_291860	Exon (TGME49_291880-t26_1/TGME49_291880	545	623	TGME49_268370	Exon (TGME49_268370-t26_1/TGME49_268370	152	232	TGME49_314250	Promoter (<=1kb)	328	TGME49_226910	528
TGME49_280490	Promoter (1-2kb)	341	555	TGME49_255460	Exon (TGME49_255460-t26_1/TGME49_255460	203	514	TGME49_228160	Promoter (<=1kb)	1302	TGME49_226970	599
TGME49_295370	Promoter (<=1kb)	367	227	TGME49_277060	Exon (TGME49_277060-t26_1/TGME49_277060	186	313	TGME49_204300	Promoter (<=1kb)	1013	TGME49_227050	195
TGME49_201400	Promoter (1-2kb)	233	321	TGME49_287170	Exon (TGME49_287160-t26_1/TGME49_287160	156	252	TGME49_228990	Promoter (<=1kb)	948	TGME49_227080	180
TGME49_310420	Promoter (<=1kb)	1042	528	TGME49_267100	Exon (TGME49_267100-t26_1/TGME49_267100	209	249	TGME49_256800	Promoter (<=1kb)	1019	TGME49_227280	616
TGME49_239010	Promoter (<=1kb)	990	408	TGME49_221280	Exon (TGME49_221280-t26_1/TGME49_221280	257	334	TGME49_310900	Promoter (1-2kb)	1343	TGME49_227360	250
TGME49_224760	Promoter (<=1kb)	761	345	TGME49_297320	Exon (TGME49_297330-t26_1/TGME49_297330	172	227	TGME49_286010	Promoter (<=1kb)	712	TGME49_227440	370
TGME49_264150	Promoter (<=1kb)	954	644	TGME49_221280	Exon (TGME49_221280-t26_1/TGME49_221280	295	344	TGME49_243940	Promoter (<=1kb)	566	TGME49_227560	166
TGME49_280375	Promoter (<=1kb)	536	608	TGME49_228220	Exon (TGME49_228230-t26_1/TGME49_228230	168	132	TGME49_273980	Promoter (<=1kb)	698	TGME49_227810	262
TGME49_231630	Promoter (<=1kb)	642	343	TGME49_287990	Exon (TGME49_287980-t26_1/TGME49_287980	133	190	TGME49_215775	Promoter (<=1kb)	423	TGME49_227830	211
TGME49_306660	Promoter (1-2kb)	778	119	TGME49_223880	Exon (TGME49_223880-t26_1/TGME49_223880	138	300	TGME49_246020	Promoter (<=1kb)	625	TGME49_227970	586
TGME49_271040	Promoter (<=1kb)	383	523	TGME49_293520	Exon (TGME49_293550-t26_1/TGME49_293550	204	266	TGME49_293290	Promoter (<=1kb)	639	TGME49_228230	705
TGME49_245480	Promoter (1-2kb)	805	617	TGME49_265530	Exon (TGME49_265530-t26_1/TGME49_265530	429	449	TGME49_224230	Promoter (<=1kb)	727	TGME49_228230	551
TGME49_201670	Promoter (<=1kb)	256	130	TGME49_247290	Exon (TGME49_247290-t26_1/TGME49_247290	308	391	TGME49_205210	Promoter (<=1kb)	460	TGME49_228290	779
TGME49_214930	Promoter (<=1kb)	321	118	TGME49_224060	Exon (TGME49_224070-t26_1/TGME49_224070	157	240	TGME49_203705	Promoter (<=1kb)	1235	TGME49_228360	220
TGME49_233500	Exon (TGME49_233500-t26_1/TGME49_233500	1152	207	TGME49_246178	Exon (TGME49_246170-t26_1/TGME49_246170	755	627	TGME49_257572	Promoter (<=1kb)	1189	TGME49_228780	849
TGME49_211730	Promoter (<=1kb)	206	181	TGME49_255870	Exon (TGME49_255880-t26_1/TGME49_255880	828	178	TGME49_311700	Promoter (<=1kb)	897	TGME49_228980	350
TGME49_293900	Promoter (<=1kb)	438	432	TGME49_239270	Exon (TGME49_239270-t26_1/TGME49_239270	173	395	TGME49_281660	Promoter (<=1kb)	284	TGME49_229360	392
TGME49_219520	Promoter (<=1kb)	152	140	TGME49_247460	Exon (TGME49_247450-t26_1/TGME49_247450	651	1696	TGME49_277060	Promoter (<=1kb)	1299	TGME49_229640	202
TGME49_263260	Promoter (1-2kb)	1019	219	TGME49_276180	Exon (TGME49_276180-t26_1/TGME49_276180	114	299	TGME49_269010	Promoter (<=1kb)	491	TGME49_230480	826
TGME49_280380	Promoter (<=1kb)	456	170	TGME49_319610	Exon (TGME49_319610-t26_1/TGME49_319610	149	246	TGME49_206650	Promoter (<=1kb)	589	TGME49_230705	1276
TGME49_281480	Promoter (<=1kb)	434	423	TGME49_226320	Exon (TGME49_226320-t26_1/TGME49_226320	217	456	TGME49_270680	Promoter (<=1kb)	472	TGME49_230850	55
TGME49_203682	Promoter (<=1kb)	178	178	TGME49_313495	Exon (TGME49_313495-t26_1/TGME49_313495	140	220	TGME49_231880	Promoter (<=1kb)	973	TGME49_230970	209
TGME49_297810	Distal Intergenic	74	141	TGME49_270880	Exon (TGME49_270880-t26_1/TGME49_270880	91	184	TGME49_294400	Promoter (<=1kb)	712	TGME49_231100	170
TGME49_321440	Promoter (<=1kb)	158	603	TGME49_212130	Exon (TGME49_212130-t26_1/TGME49_212130	319	215	TGME49_306480	Distal Intergenic	712	TGME49_231380	266
TGME49_319850	Promoter (<=1kb)	303	238	TGME49_243482	Exon (TGME49_273478-t26_1/TGME49_273478	165	300	TGME49_249040	Promoter (<=1kb)	676	TGME49_231880	105
TGME49_231800	Promoter (<=1kb)	173	90	TGME49_225970	Exon (TGME49_225960-t26_1/TGME49_225960	316	211	TGME49_320090	Promoter (<=1kb)	432	TGME49_231960	115
TGME49_227275	Promoter (1-2kb)	670	313	TGME49_254940	Exon (TGME49_254940-t26_1/TGME49_254940	311	180	TGME49_309410	Promoter (<=1kb)	668	TGME49_232000	382
TGME49_309740	Promoter (<=1kb)	162	191	TGME49_229630	Exon (TGME49_229630-t26_1/TGME49_229630	154	271	TGME49_267680	Promoter (<=1kb)	1361	TGME49_232035	12
TGME49_293760	Promoter (<=1kb)	942	692	TGME49_206680	Exon (TGME49_206670-t26_1/TGME49_206670	135	317	TGME49_240880	Promoter (<=1kb)	930	TGME49_232410	655
TGME49_310930	Promoter (<=1kb)	528	212	TGME49_201140	Exon (TGME49_201140-t26_1/TGME49_201140	302	319	TGME49_219660	Promoter (<=1kb)	1433	TGME49_233000	130
TGME49_264660	Promoter (<=1kb)	948	1038	TGME49_202030	Exon (TGME49_202030-t26_1/TGME49_202030	164	1009	TGME49_203800	Promoter (1-2kb)	409	TGME49_233380	1568
TGME49_206640	Promoter (<=1kb)	583	591	TGME49_262420	Exon (TGME49_262420-t26_1/TGME49_262420	121	157	TGME49_222370	Promoter (<=1kb)	609	TGME49_233500	830
TGME49_259830	Promoter (<=1kb)	361	126	TGME49_237290	Exon (TGME49_237290-t26_1/TGME49_237290	213	2220	TGME49_280470	Promoter (<=1kb)	713	TGME49_233500	555
TGME49_284310	Promoter (<=1kb)	164	335	TGME49_239410	Exon (TGME49_239410-t26_1/TGME49_239410	513	737	TGME49_319520	Promoter (<=1kb)	422	TGME49_234200	220
TGME49_204300	Promoter (<=1kb)	768	321	TGME49_235420	Exon (TGME49_235420-t26_1/TGME49_235420	183	219	TGME49_237550	Promoter (<=1kb)	967	TGME49_234230	629
TGME49_295040	Promoter (<=1kb)	475	275	TGME49_204460	Exon (TGME49_204440-t26_1/TGME49_204440	271	140	TGME49_267460	Promoter (<=1kb)	520	TGME49_234250	1988
TGME49_206330	Promoter (<=1kb)	258	569	TGME49_215010	Exon (TGME49_215010-t26_1/TGME49_215010	257	274	TGME49_316690	Promoter (<=1kb)	694	TGME49_234410	257
TGME49_214070	Promoter (<=1kb)	815	230	TGME49_297320	Exon (TGME49_297330-t26_1/TGME49_297330	98	274	TGME49_318610	Promoter (<=1kb)	1252	TGME49_234430	831
TGME49_220330	Promoter (<=1kb)	193	383	TGME49_278440	Exon (TGME49_278440-t26_1/TGME49_278440	141	256	TGME49_229730	Promoter (<=1kb)	911	TGME49_234440	8
TGME49_289690	Promoter (<=1kb)	1515	321	TGME49_289510	Exon (TGME49_289510-t26_1/TGME49_289510	386	363	TGME49_281430	Distal Intergenic	937	TGME49_234450	377
TGME49_275820	Promoter (<=1kb)	505	161	TGME49_312875	Exon (TGME49_312875-t26_1/TGME49_312875	142	159	TGME49_243120	Promoter (<=1kb)	240	TGME49_234460	102
TGME49_259030	Promoter (<=1kb)	199	856	TGME49_250800	Exon (TGME49_250800-t26_1/TGME49_250800	462	662	TGME49_276920	Promoter (<=1kb)	1297	TGME49_234470	378
TGME49_320260	Promoter (<=1kb)	691	84	TGME49_281400	Exon (TGME49_281400-t26_1/TGME49_281400	218	125	TGME49_232400	Promoter (<=1kb)	758	TGME49_234560	4
TGME49_251962	Promoter (<=1kb)	635	769	TGME49_253900	Exon (TGME49_253900-t26_1/TGME49_253900	116	217	TGME49_238440	Promoter (<=1kb)	428	TGME49_234670	437
TGME49_220425	Promoter (<=1kb)	368	268	TGME49_206670	Exon (TGME49_206670-t26_1/TGME49_206670	194	245	TGME49_207050	Promoter (<=1kb)	658	TGME49_234970	358
TGME49_234530	Promoter (<=1kb)	541	433	TGME49_246178	Exon (TGME49_246170-t26_1/TGME49_246170	157	189	TGME49_264260	Distal Intergenic	745	TGME49_235010	335
TGME49_257770	Promoter (1-2kb)	337	171	TGME49_234900	Exon (TGME49_234900-t26_1/TGME49_234900	345	261	TGME49_267670	Promoter (<=1kb)	581	TGME49_235140	445
TGME49_248915	Promoter (<=1kb)	941	139	TGME49_314850	Exon (TGME49_314850-t26_1/TGME49_314850	243	149	TGME49_316580	Promoter (<=1kb)	788	TGME49_235150	75
TGME49_294980	Promoter (<=1kb)	431	455	TGME49_220510	Exon (TGME49_220500-t26_1/TGME49_220500	117	266	TGME49_214070	Promoter (<=1kb)	688	TGME49_235380	232
TGME49_257750	Promoter (<=1kb)	946	576	TGME49_240200	Exon (TGME49_240210-t26_1/TGME49_240210	222	172	TGME49_254890	Promoter (<=1kb)	1059	TGME49_235460	1251
TGME49_293710	Promoter (<=1kb)	467	229	TGME49_269940	Exon (TGME49_269940-t26_1/TGME49_269940	145	233	TGME49_215895	Promoter (<=1kb)	705	TGME49_235670	114
TGME49_268850	Promoter (<=1kb)	68	442	TGME49_284180	Exon (TGME49_284180-t26_1/TGME49_284180	356	386	TGME49_249540	5' UTR	1090	TGME49_235920	51
TGME49_286000	Promoter (<=1kb)	486	121	TGME49_226320	Exon (TGME49_226320-t26_1/TGME49_226320	124	171	TGME49_216200	Promoter (<=1kb)	1027	TGME49_236260	203
TGME49_247220	Promoter (<=1kb)	909	545	TGME49_294730	Exon (TGME49_294730-t26_1/TGME49_294730	154	429	TGME49_285800	Promoter (<=1kb)	442	TGME49_236290	709
TGME49_306510	Promoter (<=1kb)	1245	158	TGME49_315860	Exon (TGME49_315860-t26_1/TGME49_315860	206	203	TGME49_261400	Promoter (<=1kb)	702	TGME49_236630	403
TGME49_247410	Promoter (<=1kb)	372	373	TGME49_213635	Exon (TGME49_213635-t26_1/TGME49_213635	110	1056	TGME49_263830	Promoter (<=1kb)	564	TGME49_236850	148
TGME49_236950	Promoter (<=1kb)	1180	315	TGME49_271285	Exon (TGME49_271290-t26_1/TGME49_271290	356	150	TGME49_205180	Promoter (<=1kb)	415	TGME49_236970	705
TGME49_277510	Promoter (<=1kb)	440	440	TGME49_214835	Exon (TGME49_214840-t26_1/TGME49_214840	694	1435	TGME49_318525	Promoter (<=1kb)	451	TGME49_236980	50
TGME49_318580	Exon (TGME49_318580-t26_1/TGME49_318580	163	406	TGME49_224270	Exon (TGME49_224260-t26_1/TGME49_224260	118	293	TGME49_239020	Promoter (<=1kb)	392	TGME49_237000	233
TGME49_314070	Promoter (<=1kb)	649	1043	TGME49_233120	Exon (TGME49_233120-t26_1/TGME49_233120	1122	1008	TGME49_201180	Promoter (<=1kb)	463	TGME49_237010	493
TGME49_221620	Promoter (<=1kb)	585	121	TGME49_228120	Exon (TGME49_228120-t26_1/TGME49_228120	114	156	TGME49_277240	Promoter (<=1kb)	153	TGME49_237090	133
TGME49_266900	Promoter (<=1kb)	1035	848	TGME49_246170	Exon (TGME49_246170-t26_1/TGME49_246170	164	202	TGME49_249410	Promoter (<=1kb)	269	TGME49_237195	116
TGME49_250500	Promoter (<=1kb)	427	358	TGME49_231440	Exon (TGME49_231440-t26_1/TGME49_231440	128	358	TGME49_267980	Promoter (<=1kb)	543	TGME49_237270	418
TGME49_203830	Promoter (<=1kb)	208	179	TGME49_237480	Exon (TGME49_237480-t26_1/TGME49_237480	71	161	TGME49_221560	Promoter (<=1kb)	390	TGME49_237290	36
TGME49_203820	Promoter (<=1kb)	157	707	TGME49_270720	Exon (TGME49_270720-t26_1/TGME49_270720	152	148	TGME49_218955	Promoter (<=1kb)	1196	TGME49_237290	200
TGME49_295935	Promoter (<=1kb)	823	141	TGME49_239885	Exon (TGME49_239885-t26_1/TGME49_239885	162	196	TGME49_277260	Promoter (<=1kb)	352	TGME49_237410	494
TGME49_312630	Promoter (<=1kb)	189	916	TGME49_224160	Exon (TGME49_224160-t26_1/TGME49_224160	365	251	TGME49_305110	Promoter (<=1kb)	281	TGME49_237880	500
TGME49_246130	Promoter (<=1kb)	165	467	TGME49_313273	Exon (TGME49_313270-t26_1/TGME49_313270	107	142	TGME49_306510	Promoter (<=1kb)	538	TGME49_238050	950
TGME49_233470	Promoter (<=1kb)	152	214	TGME49_234420	Exon (TGME49_234410-t26_1/TGME49_234410	1007	245	TGME49_207965	Promoter (<=1kb)	274	TGME49_238210	255
TGME49_246490	3' UTR	448	64	TGME49_284180	Exon (TGME49_284180-t26_1/TGME49_284180	156	865	TGME49_230480	Promoter (<=1kb)	264	TGME49_238210	88
TGME49_257680	Exon (TGME49_257670-t26_1/TGME49_257670	713	1075	TGME49_291140	Exon (TGME49_291140-t26_1/TGME49_291140	160	161	TGME49_264660	Promoter (<=1kb)	561	TGME49_238240	745
TGME49_216720	Promoter (<=1kb)	344	464	TGME49_234410	Exon (TGME49_234410-t26_1/TGME49_234410	121	165	TGME49_274170	Promoter (<=1kb)	267	TGME49_238410	305
TGME49_251740	Promoter (<=1kb)	846	208	TGME49_238410	Exon (TGME49_238400-t26_1/TGME49_238400	176	177	TGME49_320600	Promoter (<=1kb)	313	TGME49_238490	919
TGME49_234230	Promoter (1-2kb)	534	235	TGME49_269460	Exon (TGME49_269460-t26_1/TGME49_269460	326	197	TGME49_306370	Promoter (1-2kb)	225	TGME49_238530	253
TGME49_253430	Promoter (<=1kb)	243	217	TGME49_226810	Exon (TGME49_226810-t26_1/TGME49_226810	104	170	TGME49_306450	Promoter (<=1kb)	255	TGME49_238895	276
TGME49_230170	Promoter (<=1kb)	1407	454	TGME49_214150	Exon (TGME49_214140-t26_1/TGME49_214140	90	443	TGME49_268178	Promoter (<=1kb)	367	TGME49_239010	508
TGME49_215260	Promoter (<=1kb)	839	604	TGME49_229790	Exon (TGME49_229790-t26_1/TGME49_229790	171	342	TGME49_202050	Promoter (<=1kb)	1017	TGME49_239050	193
TGME49_275850	Promoter (<=1kb)	449	493	TGME49_206450	Exon (TGME49_206430-t26_1/TGME49_206430	193	177	TGME49_261980	Promoter (<=1kb)	441	TGME49_239420	866
TGME49_305160	Promoter (<=1kb)	509	81	TGME49_305790	Exon (TGME49_305790-t26_1/TGME49_305790	181	799	TGME49_252210	Promoter (<=1kb)	875	TGME49_239600	326
TGME49_243950	Distal Intergenic	244	208	TGME49_202330	Exon (TGME49_202340-t26_1/TGME49_202340	1388	236	TGME49_272430	Promoter (<=1kb)	482	TGME49_239740	531
TGME49_295770	Promoter (<=1kb)	492	164	TGME49_221660	Exon (TGME49_221660-t26_1/TGME49_221660	176	247	TGME49_226950	Promoter (<=1kb)	452	TGME49_239795	930
TGME49_304740	Promoter (<=1kb)	607	373	TGME49_207590	Exon (TGME49_207480-t26_1/TGME49_207480	200	203	TGME49_319360	Promoter (<=1kb)	291	TGME49_239810	522
TGME49_275440	Promoter (<=1kb)	940	802	TGME49_230210	Exon (TGME49_230220-t26_1/TGME49_230220	156	215	TGME49_266368	Promoter (1-2kb)	267	TGME49_239810	440
TGME49_270240	Promoter (<=1kb)	1763	627	TGME49_223470	Exon (TGME49_223450-t26_1/TGME49_223450	72	242	TGME49_275850	Promoter (<=1kb)	234	TGME49_239820	454
TGME49_300270	Promoter (<=1kb)	576	343	TGME49_203490	Exon (TGME49_203480-t26_1/TGME49_203480	112	225	TGME49_239270	Promoter (1-2kb)	391	TGME49_239870	328
TGME49_243190	Promoter (<=1kb)	713	190	TGME49_306410	Exon (TGME49_306400-t26_1/TGME49_306400	315	1325	TGME49_238150	Promoter (<=1kb)	422	TGME49_240070	547
TGME49_297880	Promoter (<=1kb)	826	1023	TGME49_319610	Exon (TGME49_319610-t26_1/TGME49_319610	146	222	TGME49_319560	Promoter (<=1kb)	356	TGME49_240370	257
TGME49_219742	Promoter (<=1kb)	413	791	TGME49_227900	Exon (TGME49_227900-t26_1/TGME49_227900	163	256	TGME49_295662	Promoter (<=1kb)	395	TGME49_240880	269
TGME49_294800	Promoter (<=1kb)	1044	1017	TGME49_268240	Exon (TGME49_268240-t26_1/TGME49_268240	161	128	TGME49_223080	Promoter (<=1kb)	517	TGME49_240880	578
TGME49_258410	Promoter (<=1kb)	343	204	TGME49_314860	Exon (TGME49_314860-t26_1/TGME49_314860	110	311	TGME49_238460	Promoter (<=1kb)	673	TGME49_240900	925
TGME49_285800	Promoter (<=1kb)	219	176	TGME49_306000	Exon (TGME49_306000-t26_1/TGME49_306000	201	244	TGME49_205370	Promoter (<=1kb)	585	TGME49_240900	904
TGME49_306480	Promoter (<=1kb)	1701	256	TGME49_321460	Exon (TGME49_321450-t26_1/TGME49_321450	285	178	TGME49_257925	Promoter (1-2kb)	730	TGME49_241300	200
TGME49_205680	Promoter (<=1kb)	340	418	TGME49_316690	Exon (TGME49_316680-t26_1/TGME49_316680	287	305	TGME49_289920	Promoter (<=1kb)	329	TGME49_241710	409
TGME49_290682	Promoter (<=1kb)	213	782	TGME49_268240	Exon (TGME49_268240-t26_1/TGME49_268240	600	140	TGME49_244510	Promoter (<=1kb)	581	TGME49_241820	165
TGME49_209050	Promoter (1-2kb)	87	312	TGME49_272000	Exon (TGME49_272000-t26_1/TGME49_272000	407	115	TGME49_309890	Promoter (<=1kb)	297	TGME49_241820	217
TGME49_275470	Promoter (<=1kb)	260	450	TGME49_230820	Exon (TGME49_230830-t26_1/TGME49_230830	157	275	TGME49_301240	Promoter (1-2kb)	669	TGME49_242070	1284
TGME49_292950	Promoter (<=1kb)	562	920	TGME49_319520	Exon (TGME49_319520-t26_1/TGME49_319520	161	181	TGME49_238050	Promoter (<=1kb)	335	TGME49_242090	652
TGME49_295300	Promoter (<=1kb)	225	256	TGME49_206680	Exon (TGME49_206670-t26_1/TGME49_206670	120	147	TGME49_246210	Promoter (<=1kb)	814	TGME49_242100	163
TGME49_307830	Promoter (<=1kb)	795	227	TGME49_208530	Exon (TGME49_208510-t26_1/TGME49_208510	215	253	TGME49_320480	Promoter (<=1kb)	684	TGME49_242320	570
TGME49_279350	Promoter (1-2kb)	368	227	TGME49_244300	Exon (TGME49_244300-t26_1/TGME49_244300	103	151	TGME49_264805	Promoter (<=1kb)	350	TGME49_242360	11
TGME49_319900	Promoter (<=1kb)	255	291	TGME49_223880	Exon (TGME49_223880-t26_1/TGME49_223880	168	224	TGME49_255460	Promoter (<=1kb)	312	TGME49_242820	82
TGME49_289370	Promoter (<=1kb)	1027	316	TGME49_320090	Exon (TGME49_320100-t26_1/TGME49_320100	112	190	TGME49_319640	Promoter (<=1kb)	646	TGME49_243190	167
TGME49_222370	Promoter (<=1kb)	633	269	TGME49_265250	Exon (TGME49_265250-t26_1/TGME49_265250	110	264	TGME49_319630	Promoter (<=1kb)	702	TGME49_243200	574
TGME49_289050	Exon (TGME49_289050-t26_1/TGME49_289050	588	240	TGME49_201800	Exon (TGME49_201820-t26_1/TGME49_201820	525	186	TGME49_310420	Promoter (<=1kb)	507	TGME49_243250	226
TGME49_204000	Promoter (<=1kb)	442	443	TGME49_254940	Exon (TGME49_254940-t26_1/TGME49_254940	360	160	TGME49_295400	Promoter (<=1kb)	609	TGME49_243400	159
TGME49_275790	Promoter (<=1kb)	301	255	TGME49_320015	Exon (TGME49_320010-t26_1/TGME49_320010	99	257	TGME49_312690	Promoter (<=1kb)	1079	TGME49_243430	646
TGME49_253380	Promoter (<=1kb)	242	146	TGME49_250800	Exon (TGME49_250800-t26_1/TGME49_250800	295	284	TGME49_240880	3' UTR	442	TGME49_243550	47
TGME49_313900	Distal Intergenic	521	158	TGME49_216420	Exon (TGME49_216430-t26_1/TGME49_216430	106	163	TGME49_209180	Promoter (<=1kb)	1803	TGME49_243635	97
TGME49_288620	Promoter (<=1kb)	849	259	TGME49_203950	Exon (TGME49_203950-t26_1/TGME49_203950	442	145	TGME49_240930	Promoter (<=1kb)	477	TGME49_243920	988
TGME49_318220	Promoter (<=1kb)	334	4	TGME49_291140	Exon (TGME49_291140-t26_1/TGME49_291140	123	353	TGME49_266600	Promoter (<=1kb)	360	TGME49_244390	3
TGME49_295662	Promoter (<=1kb)	807	46	TGME49_286410	Exon (TGME49_286270-t26_1/TGME49_286270	59	137	TGME49_318675	Promoter (<=1kb)	349	TGME49_244940	26
TGME49_300048	Promoter (<=1kb)	473	164	TGME49_314840	Exon (TGME49_314840-t26_1/TGME49_314840	105	312	TGME49_293710	Promoter (<=1kb)	538	TGME49_245640	273
TGME49_262410	Promoter (<=1kb)	589	478	TGME49_233120	Exon (TGME49_233120-t26_1/TGME49_233120	224	155	TGME49_259030	Promoter (<=1kb)	595	TGME49_245980	429
TGME49_238470	Promoter (<=1kb)	857	262	TGME49_207880	Exon (TGME49_207875-t26_1/TGME49_207875	125	241	TGME49_286590	Promoter (<=1kb)	339	TGME49_245980	263
TGME49_271375	Promoter (<=1kb)	232	260	TGME49_289520	Exon (TGME49_289520-t26_1/TGME49_289520	238	187	TGME49_232955	Promoter (<=1kb)	187	TGME49_246010	444
TGME49_205170	Promoter (<=1kb)	218	256	TGME49_224160	Exon (TGME49_224160-t26_1/TGME49_224160	279	229	TGME49_208020	Promoter (1-2kb)	390	TGME49_246070	297
TGME49_262610	Promoter (<=1kb)	601	489	TGME49_224070	Exon (TGME49_224070-t26_1/TGME49_224070	194	283	TGME49_241710	Promoter (<=1kb)	276	TGME49_246170	187
TGME49_231850	Promoter (<=1kb)	624	198	TGME49_250800	Exon (TGME49_250800-t26_1/TGME49_250800	84	122	TGME49_282200	Promoter (<=1kb)	357	TGME49_246170	78
TGME49_277250	Promoter (<=1kb)	390	285	TGME49_230940	Exon (TGME49_230940-t26_1/TGME49_230940	279	689	TGME49_227090	Promoter (<=1kb)	934	TGME49_246170	447
TGME49_227275	Promoter (<=1kb)	175	122	TGME49_204270	Exon (TGME49_204160-t26_1/TGME49_204160	229	252	TGME49_316130	Promoter (<=1kb)	663	TGME49_246590	206
TGME49_214310	Promoter (<=1kb)	883	240	TGME49_311850	Exon (TGME49_311860-t26_1/TGME49_311860	101	226	TGME49_239090	Promoter (<=1kb)	269	TGME49_247195	337
TGME49_309352	Promoter (<=1kb)	477	90	TGME49_204150	Exon (TGME49_204140-t26_1/TGME49_204140	125	304	TGME49_240240	Promoter (<=1kb)	578	TGME49_247240	593
TGME49_229630	Promoter (<=1kb)	263	142	TGME49_272720	Exon (TGME49_272710-t26_1/TGME49_272710	374	1053	TGME49_288360	Promoter (<=1kb)	328	TGME49_247350	917
TGME49_255370	Promoter (<=1kb)	109	316	TGME49_237890	Exon (TGME49_237890-t26_1/TGME49_237890	130	284	TGME49_240330	Promoter (<=1kb)	255	TGME49_247530	365
TGME49_225780	Promoter (<=1kb)	165	81	TGME49_277090	Exon (TGME49_277090-t26_1/TGME49_277090	235	212	TGME49_249600	Promoter (<=1kb)	710	TGME49_247630	343
TGME49_310670	Promoter (<=1kb)	761	218	TGME49_202500	Exon (TGME49_202490-t26_1/TGME49_202490	320	153	TGME49_235635	Promoter (<=1kb)	452	TGME49_247730	725
TGME49_220240	Promoter (<=1kb)	978	312	TGME49_237280	Exon (TGME49_237280-t26_1/TGME49_237280	257	234	TGME49_299020	Promoter (<=1kb)	636	TGME49_248390	49
TGME49_268450	Promoter (<=1kb)	257	354	TGME49_313273	Exon (TGME49_313270-t26_1/TGME49_313270	174	235	TGME49_309990	Promoter (<=1kb)	398	TGME49_248420	490
TGME49_281910	Promoter (1-2kb)	139	50	TGME49_295658	Exon (TGME49_295658-t26_1/TGME49_295658	13	111	TGME49_293500	Promoter (1-2kb)	416	TGME49_248440	136
TGME49_252190	Promoter (1-2kb)	137	230					TGME49_273650	Promoter (<=1kb)	490	TGME49_248460	294
TGME49_289380	Promoter (<=1kb)	280	338					TGME49_221410	Promoter (1-2kb)	656	TGME49_248610	6
TGME49_269225	Promoter (<=1kb)	337	277					TGME49_273340	Promoter (<=1kb)	347	TGME49_248660	162
TGME49_234410	Exon (TGME49_234410-t26_1/TGME49_234410	334	397					TGME49_311380	Promoter (<=1kb)	1235	TGME49_248740	743
TGME49_210100	Promoter (<=1kb)	454	369					TGME49_294670	Promoter (<=1kb)	208	TGME49_248980	231
TGME49_321480	Promoter (<=1kb)	557	375					TGME49_240900	5' UTR	694	TGME49_248990	39
TGME49_230480	Promoter (<=1kb)	997	116					TGME49_216670	Promoter (<=1kb)	943	TGME49_249010	322
TGME49_250810	Promoter (<=1kb)	626	328					TGME49_271190	Promoter (1-2kb)	975	TGME49_249030	99
TGME49_308010	Promoter (<=1kb)	324	433					TGME49_247040	Promoter (<=1kb)	630	TGME49_249180	483
TGME49_243960	Promoter (<=1kb)	405	448					TGME49_300130	Promoter (<=1kb)	546	TGME49_249240	312
TGME49_220380	Promoter (<=1kb)	436	555					TGME49_316510	Promoter (<=1kb)	432	TGME49_249270	90
TGME49_219820	Promoter (<=1kb)	565	429					TGME49_311485	Promoter (<=1kb)	339	TGME49_249340	184
TGME49_275680	Promoter (<=1kb)	1280	83					TGME49_220400	Promoter (<=1kb)	333	TGME49_249365	395
TGME49_228170	Promoter (<=1kb)	366	434					TGME49_233180	Promoter (<=1kb)	1050	TGME49_249390	8
TGME49_242100	3' UTR	405	453					TGME49_306620	Promoter (<=1kb)	2210	TGME49_249470	197
TGME49_267460	Promoter (<=1kb)	487	213					TGME49_320250	Promoter (<=1kb)	594	TGME49_249540	1037
TGME49_219485	Promoter (<=1kb)	378	134					TGME49_217370	Promoter (<=1kb)	341	TGME49_249570	377
TGME49_308020	Promoter (<=1kb)	871	512					TGME49_226450	Promoter (<=1kb)	690	TGME49_249850	307
TGME49_315190	Promoter (<=1kb)	232	189					TGME49_306480	Promoter (<=1kb)	436	TGME49_249870	63
TGME49_305990	Promoter (<=1kb)	447	78					TGME49_250760	Promoter (<=1kb)	609	TGME49_249970	729
TGME49_224845	Promoter (<=1kb)	699	592					TGME49_230170	Promoter (1-2kb)	591	TGME49_250710	439
TGME49_241150	Promoter (<=1kb)	610	28					TGME49_249180	3' UTR	142	TGME49_250800	634
TGME49_293360	Promoter (<=1kb)	198	70					TGME49_244200	Promoter (<=1kb)	255	TGME49_250880	690
TGME49_207440	Promoter (<=1kb)	76	168					TGME49_225230	Promoter (1-2kb)	476	TGME49_250940	114
TGME49_293470	Promoter (<=1kb)	180	190					TGME49_222050	Promoter (<=1kb)	363	TGME49_251740	1104
TGME49_215970	Promoter (<=1kb)	354	430					TGME49_308090	Promoter (<=1kb)	150	TGME49_251770	615
TGME49_214610	Promoter (<=1kb)	68	113					TGME49_202580	Promoter (<=1kb)	230	TGME49_251810	304
TGME49_202840	Promoter (<=1kb)	638	410					TGME49_224630	Promoter (<=1kb)	920	TGME49_251850	235
TGME49_290670	Promoter (<=1kb)	201	261					TGME49_238210	Promoter (<=1kb)	458	TGME49_252210	652
TGME49_260400	Promoter (<=1kb)	312	53					TGME49_238490	Promoter (<=1kb)	268	TGME49_252230	149
TGME49_274290	Distal Intergenic	434	81					TGME49_259115	Promoter (1-2kb)	224	TGME49_252255	476
TGME49_271050	Promoter (<=1kb)	359	1309					TGME49_232270	Promoter (<=1kb)	387	TGME49_252360	22
TGME49_247520	Promoter (<=1kb)	218	320					TGME49_301350	Promoter (1-2kb)	300	TGME49_252430	148
TGME49_238490	Promoter (<=1kb)	309	136					TGME49_251962	Promoter (<=1kb)	229	TGME49_252870	405
TGME49_270750	Promoter (1-2kb)	229	20					TGME49_221630	Promoter (<=1kb)	302	TGME49_253170	525
TGME49_268178	Promoter (<=1kb)	181	432					TGME49_226250	Promoter (<=1kb)	370	TGME49_253380	651
TGME49_281420	Exon (TGME49_281400-t26_1/TGME49_281400	182	537					TGME49_214410	Promoter (1-2kb)	245	TGME49_253430	392
TGME49_257670	Exon (TGME49_257670-t26_1/TGME49_257670	2895	1017					TGME49_215890	3' UTR	338	TGME49_253650	165
TGME49_229260	Promoter (<=1kb)	253	354					TGME49_209985	Promoter (<=1kb)	638	TGME49_254070	231
TGME49_265090	Promoter (<=1kb)	525	206					TGME49_231160	Promoter (<=1kb)	354	TGME49_254120	215
TGME49_279345	Promoter (<=1kb)	315	57					TGME49_308010	Promoter (<=1kb)	1056	TGME49_255160	124
TGME49_289350	Exon (TGME49_289350-t26_1/TGME49_289350	120	325					TGME49_257750	Promoter (<=1kb)	239	TGME49_255370	622
TGME49_214840	Promoter (<=1kb)	1425	535					TGME49_275790	Promoter (<=1kb)	231	TGME49_255460	135
TGME49_223940	Promoter (<=1kb)	230	251					TGME49_225105	Promoter (<=1kb)	394	TGME49_255860	127
TGME49_261300	Promoter (<=1kb)	269	67					TGME49_246140	Promoter (<=1kb)	1234	TGME49_257030	439
TGME49_248990	Promoter (<=1kb)	222	208					TGME49_224290	Promoter (<=1kb)	351	TGME49_257380	268
TGME49_319360	Promoter (<=1kb)	829	342					TGME49_294820	Promoter (1-2kb)	484	TGME49_258730	7
TGME49_263830	Promoter (<=1kb)	696	865					TGME49_215910	Promoter (<=1kb)	1110	TGME49_259290	374
TGME49_315510	Promoter (<=1kb)	329	502					TGME49_224850	5' UTR	193	TGME49_260260	57
TGME49_249575	Promoter (<=1kb)	6	6					TGME49_247540	Promoter (1-2kb)	175	TGME49_260400	196
TGME49_253820	Promoter (<=1kb)	401	131					TGME49_214140	5' UTR	450	TGME49_260600	1802
TGME49_291890	Promoter (<=1kb)	221	584					TGME49_268800	Promoter (<=1kb)	131	TGME49_260830	171
TGME49_313520	Promoter (<=1kb)	202	1255					TGME49_297920	Promoter (<=1kb)	231	TGME49_261080	230
TGME49_205370	Promoter (<=1kb)	795	807					TGME49_253030	Promoter (<=1kb)	1047	TGME49_261390	171
TGME49_261240	Promoter (1-2kb)	545	451					TGME49_267370	Promoter (<=1kb)	252	TGME49_261530	321
TGME49_208560	Promoter (<=1kb)	640	186					TGME49_263250	Promoter (1-2kb)	284	TGME49_261970	239
TGME49_247440	Promoter (<=1kb)	751	346					TGME49_219300	Promoter (<=1kb)	569	TGME49_261970	393
TGME49_259965	Exon (TGME49_259965-t26_1/TGME49_259965	493	142					TGME49_318470	Promoter (<=1kb)	210	TGME49_262000	219
TGME49_232300	Promoter (<=1kb)	392	542					TGME49_260600	Promoter (<=1kb)	350	TGME49_262050	28
TGME49_221380	Promoter (<=1kb)	195	118					TGME49_224845	Promoter (<=1kb)	419	TGME49_262400	281
TGME49_217020	Exon (TGME49_217020-t26_1/TGME49_217020	222	4					TGME49_289700	Promoter (<=1kb)	370	TGME49_262670	372
TGME49_221295	Promoter (<=1kb)	189	195					TGME49_308075	Promoter (<=1kb)	129	TGME49_263570	279
TGME49_214950	Promoter (<=1kb)	169	352					TGME49_202930	Promoter (<=1kb)	400	TGME49_264420	179
TGME49_270300	Promoter (<=1kb)	277	601					TGME49_245432	Promoter (<=1kb)	575	TGME49_264420	967
TGME49_217540	Promoter (<=1kb)	373	539					TGME49_271888	Promoter (<=1kb)	286	TGME49_264610	413
TGME49_220060	Distal Intergenic	133	231					TGME49_254330	Promoter (<=1kb)	222	TGME49_264610	619
TGME49_222690	Promoter (<=1kb)	628	470					TGME49_318220	Promoter (<=1kb)	274	TGME49_264660	3
TGME49_272430	Promoter (<=1kb)	229	21					TGME49_320240	Promoter (<=1kb)	305	TGME49_264870	425
TGME49_257625	Promoter (<=1kb)	87	134					TGME49_225370	Promoter (<=1kb)	385	TGME49_264980	205
TGME49_272560	Promoter (1-2kb)	50	186					TGME49_278245	Promoter (<=1kb)	690	TGME49_264990	238
TGME49_249990	Promoter (<=1kb)	1304	593					TGME49_218550	Promoter (<=1kb)	797	TGME49_265090	475
TGME49_277060	Promoter (<=1kb)	1455	368					TGME49_307045	Promoter (<=1kb)	473	TGME49_265320	112
TGME49_305110	Promoter (<=1kb)	717	406					TGME49_200310	Promoter (<=1kb)	172	TGME49_265370	53
TGME49_232130	Promoter (<=1kb)	396	821					TGME49_278090	Promoter (<=1kb)	471	TGME49_266070	208
TGME49_215150	Promoter (<=1kb)	1222	815					TGME49_310090	Promoter (<=1kb)	313	TGME49_266100	571
TGME49_271033	Promoter (<=1kb)	2280	998					TGME49_252860	Promoter (<=1kb)	847	TGME49_266300	204
TGME49_222220	Promoter (<=1kb)	1231	7					TGME49_234460	Promoter (<=1kb)	453	TGME49_266340	265
TGME49_231140	Promoter (<=1kb)	259	161					TGME49_216080	Promoter (<=1kb)	643	TGME49_266380	810
TGME49_211850	Promoter (<=1kb)	6	72					TGME49_253780	Promoter (<=1kb)	748	TGME49_266390	148
TGME49_321500	Promoter (<=1kb)	264	323					TGME49_315610	Promoter (<=1kb)	696	TGME49_266640	52
TGME49_208430	Promoter (<=1kb)	821	349					TGME49_236040	Promoter (<=1kb)	247	TGME49_266770	28
TGME49_214800	Promoter (<=1kb)	256	139					TGME49_300190	Promoter (<=1kb)	189	TGME49_266910	655
TGME49_270640	Promoter (<=1kb)	237	123					TGME49_309040	Promoter (<=1kb)	363	TGME49_266920	1068
TGME49_320592	Promoter (<=1kb)	138	140					TGME49_309352	Promoter (<=1kb)	211	TGME49_266950	1382
TGME49_244440	Promoter (<=1kb)	292	397					TGME49_224880	Promoter (1-2kb)	233	TGME49_266970	557
TGME49_236870	Promoter (1-2kb)	196	650					TGME49_231630	Promoter (<=1kb)	610	TGME49_267150	219
TGME49_214350	Promoter (<=1kb)	8	44					TGME49_321170	Distal Intergenic	152	TGME49_267450	1116
TGME49_227630	Promoter (<=1kb)	514	265					TGME49_294550	Promoter (<=1kb)	373	TGME49_267550	318
TGME49_312560	Promoter (<=1kb)	178	180					TGME49_204270	Promoter (<=1kb)	504	TGME49_267585	464
TGME49_288650	Promoter (<=1kb)	153	246					TGME49_294970	Promoter (<=1kb)	224	TGME49_267680	1018
TGME49_319620	Promoter (<=1kb)	958	119					TGME49_238190	Promoter (<=1kb)	355	TGME49_267720	608
TGME49_222390	Promoter (<=1kb)	134	53					TGME49_278300	Promoter (<=1kb)	211	TGME49_267725	12
TGME49_253900	Promoter (<=1kb)	440	274					TGME49_214750	Promoter (<=1kb)	228	TGME49_267750	815
TGME49_228510	Promoter (1-2kb)	124	75					TGME49_248110	Promoter (<=1kb)	320	TGME49_267810	200
TGME49_287460	Promoter (1-2kb)	757	131					TGME49_257530	Promoter (<=1kb)	469	TGME49_268610	367
TGME49_255460	Promoter (<=1kb)	1203	507					TGME49_254060	Promoter (<=1kb)	255	TGME49_268750	4
TGME49_311375	Promoter (<=1kb)	255	172					TGME49_320680	Promoter (1-2kb)	159	TGME49_268930	234
TGME49_257925	Promoter (<=1kb)	827	82					TGME49_234370	Promoter (<=1kb)	234	TGME49_269010	855
TGME49_200480	Promoter (<=1kb)	507	499					TGME49_227430	Promoter (<=1kb)	882	TGME49_269050	261
TGME49_225200	Promoter (<=1kb)	143	139					TGME49_223845	Promoter (<=1kb)	258	TGME49_269320	91
TGME49_248700	Promoter (<=1kb)	377	168					TGME49_219742	Promoter (<=1kb)	487	TGME49_269885	265
TGME49_290920	Promoter (<=1kb)	8	388					TGME49_301480	Promoter (<=1kb)	246	TGME49_270260	223
TGME49_293370	Intron (TGME49_293370-t26_1/TGME49_293370	58	216					TGME49_250770	Promoter (<=1kb)	588	TGME49_270630	63
TGME49_286090	Promoter (<=1kb)	472	101					TGME49_270650	Promoter (<=1kb)	214	TGME49_270700	217
TGME49_293790	Promoter (<=1kb)	4	292					TGME49_293258	Promoter (1-2kb)	257	TGME49_270700	252
TGME49_206440	Promoter (<=1kb)	183	351					TGME49_220240	Promoter (<=1kb)	455	TGME49_271320	674
TGME49_224630	Promoter (<=1kb)	803	292					TGME49_314700	Promoter (<=1kb)	226	TGME49_273310	405
TGME49_220550	Promoter (<=1kb)	918	347					TGME49_234530	Promoter (<=1kb)	214	TGME49_273650	339
TGME49_293740	Promoter (<=1kb)	350	226					TGME49_313660	Promoter (<=1kb)	499	TGME49_273720	433
TGME49_249390	Promoter (<=1kb)	163	447					TGME49_293390	Promoter (<=1kb)	193	TGME49_273770	128
TGME49_253810	Promoter (<=1kb)	94	184					TGME49_249180	Promoter (<=1kb)	136	TGME49_274160	117
TGME49_288755	Promoter (<=1kb)	225	367					TGME49_309330	Promoter (<=1kb)	167	TGME49_275310	387
TGME49_250830	Promoter (<=1kb)	562	541					TGME49_278870	Promoter (<=1kb)	796	TGME49_275440	417
TGME49_258560	Promoter (<=1kb)	229	618					TGME49_247360	Promoter (<=1kb)	245	TGME49_275460	115
TGME49_306500	Promoter (<=1kb)	0	6					TGME49_269310	Promoter (<=1kb)	246	TGME49_275470	529
TGME49_311380	Promoter (<=1kb)	253	362					TGME49_253880	Promoter (<=1kb)	434	TGME49_275470	156
TGME49_219750	Promoter (<=1kb)	286	229					TGME49_223830	Promoter (1-2kb)	594	TGME49_275480	81
TGME49_209020	Promoter (1-2kb)	171	333					TGME49_203310	Promoter (1-2kb)	276	TGME49_275490	179
TGME49_252210	Promoter (<=1kb)	676	390					TGME49_268182	Promoter (<=1kb)	494	TGME49_275610	751
TGME49_204530	Promoter (<=1kb)	614	576					TGME49_250500	Promoter (<=1kb)	365	TGME49_275640	327
TGME49_215360	Promoter (<=1kb)	600	89					TGME49_275380	Promoter (<=1kb)	463	TGME49_276120	156
TGME49_215480	Promoter (<=1kb)	632	409					TGME49_297090	Promoter (<=1kb)	716	TGME49_276140	2
TGME49_220270	Promoter (<=1kb)	563	262					TGME49_316310	Promoter (<=1kb)	1221	TGME49_276140	278
TGME49_208030	Promoter (<=1kb)	1485	120					TGME49_300120	Promoter (<=1kb)	727	TGME49_276210	172
TGME49_267150	Promoter (<=1kb)	288	145					TGME49_269417	Promoter (<=1kb)	349	TGME49_276920	38
TGME49_249440	Promoter (<=1kb)	293	237					TGME49_237880	Promoter (<=1kb)	400	TGME49_276920	195
TGME49_242660	Promoter (<=1kb)	202	6					TGME49_264485	Promoter (<=1kb)	729	TGME49_277090	299
TGME49_232560	Promoter (<=1kb)	307	433					TGME49_206290	Promoter (<=1kb)	266	TGME49_277490	795
TGME49_214940	Promoter (<=1kb)	1160	1121					TGME49_231800	Promoter (1-2kb)	449	TGME49_277790	66
TGME49_220510	Promoter (<=1kb)	62	334					TGME49_239810	Promoter (1-2kb)	261	TGME49_278030	379
TGME49_270805	Promoter (<=1kb)	302	422					TGME49_243190	Promoter (<=1kb)	231	TGME49_278130	317
TGME49_245560	Promoter (<=1kb)	737	407					TGME49_310170	Promoter (<=1kb)	963	TGME49_278130	39
TGME49_240090	Promoter (<=1kb)	112	222					TGME49_222170	Promoter (<=1kb)	542	TGME49_278280	257
TGME49_248750	Promoter (<=1kb)	298	135					TGME49_269417	Promoter (1-2kb)	232	TGME49_278365	236
TGME49_289380	Promoter (<=1kb)	53	186					TGME49_247305	Promoter (<=1kb)	195	TGME49_278380	187
TGME49_207710	Promoter (<=1kb)	181	53					TGME49_294800	Promoter (<=1kb)	234	TGME49_278400	254
TGME49_221630	Promoter (<=1kb)	183	383					TGME49_289530	Promoter (<=1kb)	562	TGME49_278580	184
TGME49_255410	Promoter (<=1kb)	249	134					TGME49_205680	Promoter (<=1kb)	461	TGME49_278600	206
TGME49_253030	Promoter (<=1kb)	410	363					TGME49_308020	Promoter (<=1kb)	684	TGME49_278700	646
TGME49_259940	Promoter (<=1kb)	153	435					TGME49_210408	Promoter (<=1kb)	370	TGME49_278850	31
TGME49_232410	Promoter (<=1kb)	136	104					TGME49_243930	Promoter (<=1kb)	738	TGME49_278930	321
TGME49_207060	Promoter (<=1kb)	152	162					TGME49_259950	Promoter (<=1kb)	268	TGME49_278990	94
TGME49_257080	Distal Intergenic	84	152					TGME49_249030	Promoter (<=1kb)	232	TGME49_279100	156
TGME49_239100	Promoter (<=1kb)	355	3					TGME49_297650	Promoter (<=1kb)	261	TGME49_279400	267
TGME49_239890	Promoter (<=1kb)	1291	293					TGME49_239530	Promoter (<=1kb)	261	TGME49_279400	255
TGME49_237230	Promoter (1-2kb)	390	368					TGME49_260440	Promoter (<=1kb)	612	TGME49_280430	233
TGME49_242090	Promoter (<=1kb)	1167	177					TGME49_214430	Promoter (<=1kb)	295	TGME49_280480	156
TGME49_258870	Promoter (<=1kb)	229	377					TGME49_245480	Promoter (1-2kb)	319	TGME49_280510	404
TGME49_214520	Promoter (<=1kb)	8	294					TGME49_258840	Promoter (<=1kb)	316	TGME49_280522	472
TGME49_285240	Promoter (<=1kb)	305	123					TGME49_291920	Promoter (<=1kb)	312	TGME49_280522	163
TGME49_299825	Promoter (<=1kb)	303	352					TGME49_307270	Distal Intergenic	100	TGME49_280670	2
TGME49_225000	Promoter (1-2kb)	877	559					TGME49_241305	Promoter (<=1kb)	133	TGME49_280750	181
TGME49_212220	Promoter (<=1kb)	185	150					TGME49_225200	Promoter (<=1kb)	185	TGME49_281650	303
TGME49_242580	Promoter (<=1kb)	240	198					TGME49_243130	Promoter (<=1kb)	234	TGME49_281910	1072
TGME49_310170	Promoter (<=1kb)	283	191					TGME49_236970	Promoter (<=1kb)	507	TGME49_282170	328
TGME49_207230	Promoter (<=1kb)	51	268					TGME49_200320	Promoter (1-2kb)	803	TGME49_282190	12
TGME49_255170	Promoter (<=1kb)	98	178					TGME49_295430	Promoter (<=1kb)	343	TGME49_283510	117
TGME49_214400	Promoter (<=1kb)	507	448					TGME49_264640	Promoter (<=1kb)	216	TGME49_285140	528
TGME49_307590	3' UTR	80	368					TGME49_237090	Promoter (<=1kb)	169	TGME49_285290	196
TGME49_294980	Promoter (1-2kb)	216	357					TGME49_234250	Promoter (<=1kb)	734	TGME49_285470	4
TGME49_254050	Promoter (<=1kb)	323	193					TGME49_269320	Promoter (<=1kb)	203	TGME49_285865	440
TGME49_262780	Promoter (<=1kb)	63	207					TGME49_217410	Promoter (<=1kb)	254	TGME49_286150	186
TGME49_276950	Promoter (<=1kb)	208	373					TGME49_214420	Promoter (<=1kb)	380	TGME49_286160	223
TGME49_295100	Promoter (<=1kb)	493	62					TGME49_305790	Promoter (<=1kb)	548	TGME49_286570	410
TGME49_298080	Promoter (<=1kb)	362	161					TGME49_306500	Promoter (<=1kb)	497	TGME49_287160	33
TGME49_289970	Promoter (<=1kb)	552	455					TGME49_204400	Promoter (<=1kb)	420	TGME49_287180	19
TGME49_230160	Promoter (<=1kb)	12	406					TGME49_201820	Promoter (<=1kb)	230	TGME49_287230	448
TGME49_214360	Promoter (<=1kb)	60	238					TGME49_249850	Promoter (<=1kb)	399	TGME49_287280	50
TGME49_231970	Promoter (1-2kb)	911	275					TGME49_235630	Distal Intergenic	161	TGME49_288000	468
TGME49_232260	Promoter (<=1kb)	262	188					TGME49_320260	Promoter (<=1kb)	726	TGME49_288265	661
TGME49_230205	Promoter (<=1kb)	944	348					TGME49_294330	Promoter (<=1kb)	214	TGME49_288540	438
TGME49_249935	Promoter (<=1kb)	277	176					TGME49_246130	Promoter (<=1kb)	222	TGME49_288650	638
TGME49_253430	3' UTR	137	396					TGME49_269300	Promoter (<=1kb)	409	TGME49_288840	509
TGME49_273980	Promoter (1-2kb)	141	236					TGME49_276940	Promoter (<=1kb)	446	TGME49_288900	366
TGME49_266900	Promoter (1-2kb)	835	779					TGME49_239020	Promoter (<=1kb)	190	TGME49_288950	499
TGME49_227050	3' UTR	515	658					TGME49_291150	Promoter (<=1kb)	239	TGME49_289050	252
TGME49_279380	Promoter (<=1kb)	390	569					TGME49_267160	Promoter (<=1kb)	253	TGME49_289050	69
TGME49_278365	Promoter (<=1kb)	189	540					TGME49_249890	Promoter (<=1kb)	384	TGME49_289170	239
TGME49_309040	Promoter (<=1kb)	750	376					TGME49_234300	Promoter (<=1kb)	507	TGME49_289330	193
TGME49_278390	Promoter (<=1kb)	147	273					TGME49_275355	Promoter (<=1kb)	194	TGME49_289380	253
TGME49_290320	Promoter (<=1kb)	153	353					TGME49_297440	Promoter (<=1kb)	283	TGME49_289780	178
TGME49_295400	Promoter (<=1kb)	852	176					TGME49_254940	Promoter (<=1kb)	188	TGME49_289880	327
TGME49_305980	Promoter (1-2kb)	306	164					TGME49_290000	Promoter (<=1kb)	215	TGME49_289980	224
TGME49_228230	Promoter (<=1kb)	884	539					TGME49_221685	Promoter (<=1kb)	244	TGME49_289990	384
TGME49_270180	Promoter (<=1kb)	175	275					TGME49_247470	Promoter (<=1kb)	203	TGME49_290190	91
TGME49_247460	Promoter (<=1kb)	565	66					TGME49_268980	Promoter (<=1kb)	302	TGME49_290640	326
TGME49_212910	Promoter (<=1kb)	370	210					TGME49_270750	Promoter (1-2kb)	148	TGME49_290890	401
TGME49_271860	Promoter (<=1kb)	7	193					TGME49_238980	Promoter (<=1kb)	300	TGME49_290920	385
TGME49_320230	Promoter (<=1kb)	183	232					TGME49_310520	Promoter (<=1kb)	450	TGME49_290950	407
TGME49_226970	Promoter (1-2kb)	601	7					TGME49_321490	Promoter (<=1kb)	639	TGME49_291020	388
TGME49_266460	Promoter (<=1kb)	834	840					TGME49_285670	Promoter (<=1kb)	369	TGME49_291150	3
TGME49_269730	Promoter (<=1kb)	598	609					TGME49_214310	Promoter (<=1kb)	420	TGME49_291180	19
TGME49_239020	Promoter (<=1kb)	807	235					TGME49_255700	Distal Intergenic	261	TGME49_291300	72
TGME49_261400	Promoter (<=1kb)	438	7					TGME49_263220	Promoter (<=1kb)	277	TGME49_291640	189
TGME49_306620	Promoter (<=1kb)	1435	470					TGME49_315390	Promoter (<=1kb)	281	TGME49_292000	13
TGME49_269425	Promoter (<=1kb)	217	192					TGME49_251660	Promoter (<=1kb)	717	TGME49_292110	197
TGME49_297340	Promoter (<=1kb)	285	46					TGME49_255370	Promoter (<=1kb)	164	TGME49_292130	247
TGME49_232370	Distal Intergenic	162	306					TGME49_212900	Promoter (<=1kb)	273	TGME49_292260	973
TGME49_266950	Promoter (<=1kb)	2086	262					TGME49_318400	Promoter (<=1kb)	256	TGME49_292300	221
TGME49_301350	Promoter (<=1kb)	253	207					TGME49_313780	Promoter (<=1kb)	261	TGME49_292335	193
TGME49_284010	Promoter (<=1kb)	240	199					TGME49_214900	Promoter (<=1kb)	288	TGME49_292960	549
TGME49_238480	Promoter (1-2kb)	236	79					TGME49_223550	Promoter (<=1kb)	198	TGME49_293000	270
TGME49_261240	Distal Intergenic	68	193					TGME49_248180	Promoter (<=1kb)	585	TGME49_293180	183
TGME49_226072	Exon (TGME49_226068-t26_1/TGME49_226068	243	53					TGME49_212910	Promoter (<=1kb)	217	TGME49_293190	257
TGME49_313820	Promoter (<=1kb)	628	202					TGME49_257300	Promoter (<=1kb)	666	TGME49_293258	113
TGME49_277730	Promoter (<=1kb)	1719	149					TGME49_215480	Promoter (<=1kb)	210	TGME49_293360	441
TGME49_220400	Promoter (<=1kb)	1342	508					TGME49_203350	Promoter (<=1kb)	261	TGME49_293420	258
TGME49_263130	Promoter (<=1kb)	364	248					TGME49_221250	Promoter (<=1kb)	294	TGME49_293430	152
TGME49_230160	Promoter (<=1kb)	200	157					TGME49_311390	Promoter (<=1kb)	179	TGME49_293440	166
TGME49_214950	Promoter (1-2kb)	343	263					TGME49_245485	Promoter (<=1kb)	185	TGME49_293470	269
TGME49_254030	Promoter (<=1kb)	8	240					TGME49_282210	Promoter (<=1kb)	354	TGME49_293480	309
TGME49_216810	Promoter (1-2kb)	218	5					TGME49_267150	Promoter (<=1kb)	194	TGME49_293590	175
TGME49_228990	Promoter (<=1kb)	2624	888					TGME49_241140	Promoter (<=1kb)	245	TGME49_294560	140
TGME49_205650	Promoter (<=1kb)	663	139					TGME49_210440	5' UTR	252	TGME49_294560	75
TGME49_296000	5' UTR	1673	131					TGME49_217420	Promoter (<=1kb)	510	TGME49_294610	306
TGME49_241305	Promoter (<=1kb)	634	414					TGME49_217700	Promoter (<=1kb)	490	TGME49_294640	193
TGME49_280518	Exon (TGME49_280522-t26_1/TGME49_280522	162	636					TGME49_268880	Promoter (<=1kb)	716	TGME49_294970	497
TGME49_275380	Promoter (<=1kb)	415	69					TGME49_233500	Promoter (<=1kb)	617	TGME49_294970	242
TGME49_283870	Distal Intergenic	680	454					TGME49_287040	Promoter (<=1kb)	129	TGME49_295100	237
TGME49_217875	Promoter (<=1kb)	130	247					TGME49_314220	Promoter (<=1kb)	183	TGME49_295110	325
TGME49_212290	Promoter (<=1kb)	569	350					TGME49_232050	Promoter (<=1kb)	235	TGME49_295430	402
TGME49_293390	Promoter (<=1kb)	96	231					TGME49_232000	Promoter (<=1kb)	1070	TGME49_295450	699
TGME49_213620	Promoter (1-2kb)	617	617					TGME49_269050	Promoter (<=1kb)	337	TGME49_295460	31
TGME49_218860	Promoter (<=1kb)	36	120					TGME49_233610	Promoter (<=1kb)	273	TGME49_295600	180
TGME49_248710	Promoter (1-2kb)	342	318					TGME49_249510	Promoter (<=1kb)	580	TGME49_295620	156
TGME49_233380	Promoter (<=1kb)	1414	329					TGME49_200600	Distal Intergenic	189	TGME49_295662	432
TGME49_227600	Promoter (<=1kb)	431	267					TGME49_239430	5' UTR	274	TGME49_295920	3
TGME49_275355	Promoter (<=1kb)	479	79					TGME49_264150	Promoter (<=1kb)	272	TGME49_295920	42
TGME49_269340	Promoter (<=1kb)	224	237					TGME49_253820	Promoter (<=1kb)	307	TGME49_295990	15
TGME49_319330	Promoter (<=1kb)	207	160					TGME49_250820	Promoter (<=1kb)	144	TGME49_296000	182
TGME49_248740	Promoter (<=1kb)	641	29					TGME49_315950	Promoter (<=1kb)	324	TGME49_296000	202
TGME49_286420	Promoter (<=1kb)	767	98					TGME49_240960	Promoter (<=1kb)	517	TGME49_296121	227
TGME49_293250	Exon (TGME49_293250-t26_1/TGME49_293250	43	117					TGME49_271033	Promoter (<=1kb)	805	TGME49_296231	280
TGME49_214140	Promoter (<=1kb)	783	110					TGME49_270700	Promoter (<=1kb)	693	TGME49_297100	8
TGME49_310177	Promoter (1-2kb)	343	173					TGME49_240390	Promoter (1-2kb)	392	TGME49_297150	174
TGME49_321520	Promoter (<=1kb)	187	983					TGME49_234900	Promoter (<=1kb)	358	TGME49_297160	238
TGME49_318600	Promoter (1-2kb)	361	390					TGME49_311360	Promoter (<=1kb)	422	TGME49_297170	208
TGME49_306710	Promoter (1-2kb)	234	96					TGME49_221460	Promoter (<=1kb)	322	TGME49_297180	222
TGME49_308090	Promoter (<=1kb)	170	269					TGME49_206590	Promoter (<=1kb)	496	TGME49_297330	381
TGME49_318340	Promoter (<=1kb)	554	220					TGME49_283790	Promoter (<=1kb)	485	TGME49_297340	372
TGME49_223560	Promoter (<=1kb)	602	544					TGME49_223060	Promoter (<=1kb)	180	TGME49_297470	14
TGME49_214440	Promoter (<=1kb)	543	419					TGME49_240060	Promoter (<=1kb)	189	TGME49_297650	206
TGME49_271888	Promoter (<=1kb)	724	648					TGME49_208730	Promoter (<=1kb)	820	TGME49_297720	268
TGME49_227150	Promoter (<=1kb)	183	162					TGME49_294410	Promoter (<=1kb)	1078	TGME49_297800	388
TGME49_282200	Promoter (<=1kb)	1848	469					TGME49_311720	Promoter (<=1kb)	783	TGME49_297810	464
TGME49_221180	Promoter (<=1kb)	984	1253					TGME49_242570	Promoter (<=1kb)	758	TGME49_297960	184
TGME49_313910	Promoter (<=1kb)	307	115					TGME49_278380	Promoter (<=1kb)	190	TGME49_298600	166
TGME49_308950	Promoter (<=1kb)	238	291					TGME49_203830	Promoter (<=1kb)	347	TGME49_300000	299
TGME49_246340	Promoter (<=1kb)	168	258					TGME49_203170	Promoter (<=1kb)	195	TGME49_300040	319
TGME49_223790	Promoter (<=1kb)	35	195					TGME49_251690	Promoter (<=1kb)	467	TGME49_300048	527
TGME49_262400	Promoter (<=1kb)	699	666					TGME49_240900	Promoter (<=1kb)	1106	TGME49_300090	292
TGME49_280522	Promoter (1-2kb)	206	234					TGME49_355220	Promoter (<=1kb)	433	TGME49_300110	57
TGME49_290660	Promoter (<=1kb)	1240	463					TGME49_261710	Promoter (<=1kb)	704	TGME49_300130	923
TGME49_217688	Promoter (<=1kb)	290	214					TGME49_209200	Promoter (<=1kb)	457	TGME49_300260	326
TGME49_307650	Promoter (<=1kb)	186	5					TGME49_283780	Promoter (<=1kb)	294	TGME49_300310	341
TGME49_259950	Promoter (<=1kb)	712	97					TGME49_206540	Promoter (<=1kb)	213	TGME49_300790	144
TGME49_266050	Promoter (<=1kb)	105	48					TGME49_262400	Promoter (<=1kb)	532	TGME49_301270	134
TGME49_269438	Promoter (<=1kb)	862	272					TGME49_219750	Promoter (<=1kb)	195	TGME49_301400	333
TGME49_250360	Promoter (<=1kb)	317	343					TGME49_225690	Promoter (<=1kb)	257	TGME49_301440	1492
TGME49_217740	Promoter (<=1kb)	617	35					TGME49_300690	Promoter (<=1kb)	569	TGME49_302060	155
TGME49_269980	Promoter (<=1kb)	461	176					TGME49_269730	Promoter (<=1kb)	252	TGME49_304670	671
TGME49_263300	Promoter (<=1kb)	96	183					TGME49_238470	Promoter (<=1kb)	417	TGME49_304870	56
TGME49_317830	Distal Intergenic	58	2					TGME49_296640	Promoter (<=1kb)	149	TGME49_304870	207
TGME49_222240	Promoter (1-2kb)	334	301					TGME49_295430	Promoter (<=1kb)	308	TGME49_304930	252
TGME49_233500	Promoter (<=1kb)	826	225					TGME49_281480	Promoter (<=1kb)	449	TGME49_305100	89
TGME49_281650	Promoter (<=1kb)	215	121					TGME49_221990	Promoter (<=1kb)	238	TGME49_305100	28
TGME49_226925	Promoter (<=1kb)	176	1					TGME49_258900	Promoter (<=1kb)	262	TGME49_305120	421
TGME49_218820	Promoter (<=1kb)	322	67					TGME49_295760	Promoter (1-2kb)	255	TGME49_305330	306
TGME49_321490	Promoter (<=1kb)	252	399					TGME49_208570	Promoter (<=1kb)	300	TGME49_305460	548
TGME49_202620	Promoter (<=1kb)	143	193					TGME49_224350	Promoter (1-2kb)	237	TGME49_305610	165
TGME49_232700	Promoter (<=1kb)	574	219					TGME49_201160	Promoter (<=1kb)	998	TGME49_306060	113
TGME49_237090	Promoter (<=1kb)	283	1036					TGME49_297150	Promoter (<=1kb)	193	TGME49_306190	423
TGME49_205170	Promoter (<=1kb)	2492	770					TGME49_202620	Promoter (<=1kb)	191	TGME49_306520	779
TGME49_281575	Promoter (<=1kb)	327	151					TGME49_225000	Promoter (1-2kb)	1268	TGME49_306620	902
TGME49_278430	Promoter (<=1kb)	326	137					TGME49_309410	3' UTR	298	TGME49_306640	349
TGME49_311840	Promoter (<=1kb)	234	357					TGME49_268850	Promoter (<=1kb)	478	TGME49_307045	1065
TGME49_251550	Promoter (<=1kb)	162	415					TGME49_311890	Promoter (<=1kb)	224	TGME49_307570	187
TGME49_312490	Exon (TGME49_312480-t26_1/TGME49_312480	274	371					TGME49_285250	Promoter (1-2kb)	154	TGME49_307830	826
TGME49_307480	Promoter (<=1kb)	141	410					TGME49_216670	Promoter (<=1kb)	178	TGME49_307850	798
TGME49_248590	Promoter (<=1kb)	165	43					TGME49_251740	Promoter (<=1kb)	273	TGME49_307860	160
TGME49_232060	Promoter (<=1kb)	5	8					TGME49_294200	Promoter (<=1kb)	135	TGME49_308820	722
TGME49_321510	Promoter (1-2kb)	495	231					TGME49_244450	Promoter (<=1kb)	271	TGME49_308860	893
TGME49_250860	Promoter (<=1kb)	150	280					TGME49_217855	Promoter (<=1kb)	132	TGME49_308950	525
TGME49_225560	Promoter (<=1kb)	184	378					TGME49_231180	Promoter (<=1kb)	633	TGME49_308980	141
TGME49_219580	Promoter (<=1kb)	502	312					TGME49_293700	Promoter (<=1kb)	95	TGME49_309210	534
TGME49_273770	Promoter (<=1kb)	173	258					TGME49_219120	Promoter (<=1kb)	321	TGME49_309220	1174
TGME49_267160	Promoter (<=1kb)	796	656					TGME49_277510	Promoter (<=1kb)	403	TGME49_309410	825
TGME49_270880	Promoter (<=1kb)	132	23					TGME49_307575	Promoter (<=1kb)	753	TGME49_309560	367
TGME49_212270	Promoter (<=1kb)	247	221					TGME49_262050	Promoter (<=1kb)	269	TGME49_309590	1018
TGME49_270700	Promoter (<=1kb)	565	358					TGME49_207370	Promoter (<=1kb)	1343	TGME49_309600	291
TGME49_315670	Promoter (<=1kb)	209	41					TGME49_209960	Promoter (<=1kb)	149	TGME49_309720	20
TGME49_264080	Promoter (<=1kb)	451	225					TGME49_236670	Promoter (<=1kb)	329	TGME49_309752	830
TGME49_273340	Promoter (<=1kb)	430	161					TGME49_204420	Promoter (<=1kb)	228	TGME49_309880	634
TGME49_308900	Promoter (<=1kb)	185	280					TGME49_209030	Promoter (<=1kb)	564	TGME49_309930	99
TGME49_319550	Promoter (1-2kb)	205	216					TGME49_297340	Distal Intergenic	346	TGME49_310160	150
TGME49_245428	Promoter (<=1kb)	296	748					TGME49_216880	Promoter (<=1kb)	189	TGME49_310250	1
TGME49_219175	Promoter (<=1kb)	194	348					TGME49_295030	Promoter (1-2kb)	322	TGME49_310370	206
TGME49_304900	Promoter (<=1kb)	212	7					TGME49_245980	Promoter (<=1kb)	157	TGME49_310450	38
TGME49_308970	Promoter (<=1kb)	685	37					TGME49_300260	Promoter (<=1kb)	345	TGME49_310620	525
TGME49_253290	Distal Intergenic	52	199					TGME49_320230	Promoter (<=1kb)	753	TGME49_310710	190
TGME49_269820	Promoter (<=1kb)	475	187					TGME49_245560	Promoter (<=1kb)	562	TGME49_310730	55
TGME49_242090	Exon (TGME49_242090-t26_1/TGME49_242090	198	114					TGME49_271970	Promoter (<=1kb)	728	TGME49_310770	4
TGME49_305505	Promoter (<=1kb)	611	24					TGME49_244180	Promoter (<=1kb)	274	TGME49_310780	93
TGME49_268980	Promoter (<=1kb)	1155	743					TGME49_252870	Promoter (<=1kb)	365	TGME49_310930	540
TGME49_211480	Exon (TGME49_211480-t26_1/TGME49_211480	425	403					TGME49_221380	Promoter (<=1kb)	104	TGME49_311170	472
TGME49_233880	Promoter (<=1kb)	549	194					TGME49_295100	Promoter (<=1kb)	634	TGME49_311380	412
TGME49_249290	Promoter (<=1kb)	222	163					TGME49_222240	Promoter (1-2kb)	136	TGME49_311470	233
TGME49_275320	Promoter (<=1kb)	442	72					TGME49_214840	Promoter (<=1kb)	135	TGME49_311510	653
TGME49_258508	Promoter (<=1kb)	140	240					TGME49_279390	Promoter (<=1kb)	327	TGME49_311700	147
TGME49_321620	Promoter (<=1kb)	319	276					TGME49_268380	Distal Intergenic	225	TGME49_311760	48
TGME49_249540	5' UTR	950	2946					TGME49_258020	Promoter (<=1kb)	411	TGME49_311770	37
TGME49_204270	Promoter (<=1kb)	182	542					TGME49_287270	Promoter (<=1kb)	246	TGME49_311800	712
TGME49_264240	Distal Intergenic	131	329					TGME49_213880	Promoter (<=1kb)	587	TGME49_312200	175
TGME49_311360	Promoter (<=1kb)	236	186					TGME49_254910	Promoter (1-2kb)	317	TGME49_312230	105
TGME49_210440	5' UTR	230	142					TGME49_241840	Promoter (<=1kb)	129	TGME49_312270	122
TGME49_299000	Promoter (<=1kb)	79	10					TGME49_272520	Promoter (<=1kb)	225	TGME49_312340	40
TGME49_204280	Promoter (1-2kb)	109	164					TGME49_288950	Promoter (<=1kb)	1633	TGME49_312690	77
TGME49_269885	Promoter (<=1kb)	641	393					TGME49_200110	Distal Intergenic	375	TGME49_312860	261
TGME49_270260	Promoter (<=1kb)	423	497					TGME49_204000	Promoter (<=1kb)	223	TGME49_313140	411
TGME49_268570	Promoter (<=1kb)	738	131					TGME49_221270	Promoter (<=1kb)	373	TGME49_313180	613
TGME49_269750	Promoter (1-2kb)	124	168					TGME49_300270	Promoter (1-2kb)	248	TGME49_313240	341
TGME49_254090	Promoter (<=1kb)	529	10					TGME49_253370	Promoter (<=1kb)	390	TGME49_313380	33
TGME49_261520	Promoter (1-2kb)	229	335					TGME49_300660	Promoter (<=1kb)	79	TGME49_313390	135
TGME49_237890	Promoter (<=1kb)	710	373					TGME49_227620	Promoter (<=1kb)	194	TGME49_313445	381
TGME49_321350	Promoter (<=1kb)	354	121					TGME49_239890	Promoter (<=1kb)	204	TGME49_313580	64
TGME49_247630	Promoter (<=1kb)	59	162					TGME49_215570	Promoter (<=1kb)	459	TGME49_313640	503
TGME49_215590	Promoter (<=1kb)	245	96					TGME49_219738	Promoter (1-2kb)	137	TGME49_313910	388
TGME49_223750	Promoter (<=1kb)	330	269					TGME49_237890	Promoter (<=1kb)	183	TGME49_313910	110
TGME49_268790	Promoter (<=1kb)	323	195					TGME49_277730	Promoter (<=1kb)	178	TGME49_314110	194
TGME49_203815	Promoter (<=1kb)	92	6					TGME49_289910	Promoter (<=1kb)	293	TGME49_314220	25
TGME49_262680	3' UTR	363	515					TGME49_275440	Promoter (<=1kb)	199	TGME49_314220	199
TGME49_293340	Promoter (<=1kb)	322	7					TGME49_228230	Promoter (<=1kb)	85	TGME49_314430	239
TGME49_208450	Promoter (<=1kb)	481	642					TGME49_238030	Promoter (<=1kb)	92	TGME49_314500	815
TGME49_214210	Promoter (<=1kb)	450	10					TGME49_215150	Promoter (<=1kb)	494	TGME49_314700	955
TGME49_206680	Promoter (<=1kb)	438	172					TGME49_280460	Promoter (<=1kb)	470	TGME49_314780	183
TGME49_227275	Promoter (<=1kb)	139	127					TGME49_238220	Promoter (<=1kb)	296	TGME49_314850	217
TGME49_230380	Promoter (<=1kb)	230	241					TGME49_247220	Promoter (<=1kb)	188	TGME49_314900	219
TGME49_230850	Promoter (<=1kb)	243	373					TGME49_312420	Promoter (<=1kb)	422	TGME49_314910	17
TGME49_226430	Promoter (<=1kb)	254	275					TGME49_257625	Promoter (<=1kb)	381	TGME49_315130	172
TGME49_218300	Promoter (<=1kb)	634	111					TGME49_240325	Promoter (<=1kb)	120	TGME49_315160	14
TGME49_219750	Promoter (<=1kb)	457	348					TGME49_271930	Promoter (<=1kb)	223	TGME49_315290	1426
TGME49_269417	Promoter (1-2kb)	138	33					TGME49_292110	Promoter (<=1kb)	167	TGME49_315300	523
TGME49_289910	Promoter (1-2kb)	374	262					TGME49_258410	Promoter (<=1kb)	167	TGME49_315420	71
TGME49_214980	Distal Intergenic	104	225					TGME49_219520	Promoter (<=1kb)	357	TGME49_315490	467
TGME49_264630	Promoter (<=1kb)	398	111					TGME49_203682	Promoter (<=1kb)	315	TGME49_315580	388
TGME49_210300	Promoter (<=1kb)	204	315					TGME49_244530	Promoter (<=1kb)	66	TGME49_315610	1165
TGME49_203790	Promoter (1-2kb)	216	199					TGME49_310590	Promoter (<=1kb)	177	TGME49_315620	388
TGME49_297900	Promoter (<=1kb)	440	346					TGME49_239010	Promoter (<=1kb)	730	TGME49_315740	10
TGME49_259550	Promoter (<=1kb)	228	78					TGME49_207100	Promoter (<=1kb)	305	TGME49_315910	52
TGME49_223880	Promoter (1-2kb)	521	424					TGME49_218590	Distal Intergenic	202	TGME49_315950	907
TGME49_310790	Promoter (<=1kb)	237	418					TGME49_314450	Promoter (<=1kb)	269	TGME49_315950	88
TGME49_227615	Promoter (1-2kb)	418	261					TGME49_257350	Promoter (<=1kb)	463	TGME49_316140	226
TGME49_260540	Promoter (<=1kb)	311	252					TGME49_265020	3' UTR	127	TGME49_316370	442
TGME49_295920	Promoter (<=1kb)	738	762					TGME49_235315	Promoter (<=1kb)	643	TGME49_316510	528
TGME49_257550	Promoter (<=1kb)	155	185					TGME49_272370	Promoter (<=1kb)	129	TGME49_316510	1031
TGME49_238030	Promoter (<=1kb)	428	392					TGME49_209500	Promoter (<=1kb)	235	TGME49_316580	28
TGME49_239030	Promoter (<=1kb)	273	51					TGME49_203820	Promoter (<=1kb)	95	TGME49_316600	211
TGME49_240810	Promoter (<=1kb)	82	232					TGME49_236070	Promoter (<=1kb)	193	TGME49_316650	213
TGME49_214420	3' UTR	123	137					TGME49_254960	Promoter (<=1kb)	114	TGME49_316670	631
TGME49_213570	Promoter (<=1kb)	373	89					TGME49_217951	Distal Intergenic	412	TGME49_316690	196
TGME49_282220	Promoter (<=1kb)	273	137					TGME49_220930	Promoter (<=1kb)	710	TGME49_316700	780
TGME49_205480	Promoter (<=1kb)	189	238					TGME49_233450	Promoter (<=1kb)	329	TGME49_318150	237
TGME49_231998	Distal Intergenic	429	175					TGME49_243600	Promoter (<=1kb)	212	TGME49_318220	106
TGME49_309330	Promoter (<=1kb)	146	569					TGME49_294240	Promoter (<=1kb)	179	TGME49_318240	157
TGME49_206660	Promoter (<=1kb)	29	45					TGME49_267070	Promoter (<=1kb)	132	TGME49_318300	373
TGME49_269710	Promoter (<=1kb)	318	5					TGME49_293440	Promoter (<=1kb)	210	TGME49_318400	183
TGME49_293550	Exon (TGME49_293550-t26_1/TGME49_293550	208	312					TGME49_219800	Promoter (<=1kb)	160	TGME49_318470	399
TGME49_201260	Promoter (<=1kb)	243	200					TGME49_213430	Promoter (<=1kb)	220	TGME49_318600	365
TGME49_225990	Promoter (<=1kb)	180	40					TGME49_258580	Promoter (<=1kb)	153	TGME49_318610	763
TGME49_254680	Promoter (<=1kb)	385	70					TGME49_266368	Distal Intergenic	103	TGME49_318610	269
TGME49_297870	Promoter (1-2kb)	131	260					TGME49_313110	3' UTR	203	TGME49_318770	373
TGME49_258458	Promoter (<=1kb)	102	78					TGME49_310930	Promoter (<=1kb)	147	TGME49_319340	789
TGME49_232410	Promoter (<=1kb)	912	341					TGME49_227800	Promoter (1-2kb)	134	TGME49_319350	654
TGME49_313020	Promoter (<=1kb)	568	531					TGME49_310390	Promoter (<=1kb)	871	TGME49_319520	160
TGME49_264740	Promoter (<=1kb)	65	808					TGME49_279315	Promoter (<=1kb)	536	TGME49_319560	903
TGME49_262920	Exon (TGME49_262920-t26_1/TGME49_262920	1	201					TGME49_244660	Promoter (<=1kb)	191	TGME49_320030	193
TGME49_311390	Promoter (<=1kb)	7	148					TGME49_222390	Promoter (<=1kb)	263	TGME49_320090	1013
TGME49_247025	Promoter (<=1kb)	689	137					TGME49_241880	Promoter (<=1kb)	345	TGME49_320100	234
TGME49_266620	3' UTR	329	185					TGME49_209440	Promoter (1-2kb)	327	TGME49_320110	754
TGME49_207820	Promoter (1-2kb)	681	390					TGME49_257090	Promoter (<=1kb)	185	TGME49_320180	208
TGME49_202930	Promoter (<=1kb)	999	481					TGME49_308970	Promoter (<=1kb)	141	TGME49_320240	200
TGME49_304930	Promoter (1-2kb)	178	70					TGME49_222080	Promoter (<=1kb)	251	TGME49_320260	197
TGME49_266070	Promoter (1-2kb)	361	15					TGME49_232130	Promoter (<=1kb)	186	TGME49_320470	110
TGME49_221295	Promoter (1-2kb)	358	61					TGME49_311375	Promoter (<=1kb)	368	TGME49_320630	865
TGME49_294610	Promoter (<=1kb)	547	224					TGME49_278330	Promoter (<=1kb)	158	TGME49_320740	389
TGME49_302007	Promoter (<=1kb)	259	233					TGME49_218188	Promoter (<=1kb)	234	TGME49_321360	234
TGME49_233480	Promoter (<=1kb)	825	582					TGME49_306270	Promoter (<=1kb)	257	TGME49_321430	186
TGME49_205670	Promoter (<=1kb)	67	164					TGME49_223390	Promoter (<=1kb)	92	TGME49_321480	173
TGME49_306580	Promoter (<=1kb)	335	141					TGME49_294830	Promoter (<=1kb)	570	TGME49_321630	130
TGME49_315140	Promoter (<=1kb)	195	190					TGME49_212770	Promoter (<=1kb)	423	TGME49_321650	10
TGME49_225120	Promoter (<=1kb)	388	7					TGME49_220350	Promoter (<=1kb)	117	TGME49_321800	147
TGME49_213067	Promoter (<=1kb)	371	136					TGME49_221540	Promoter (<=1kb)	210	TGME49_323110	262
TGME49_313780	Promoter (<=1kb)	345	124					TGME49_245460	Promoter (<=1kb)	423	TGME49_323400	568
TGME49_312940	Promoter (<=1kb)	190	213					TGME49_217760	Promoter (<=1kb)	142	TGME49_325800	323
TGME49_265270	Promoter (<=1kb)	145	342					TGME49_293050	Promoter (<=1kb)	571	TGME49_329100	170
TGME49_232000	Promoter (<=1kb)	474	2047					TGME49_308860	Promoter (1-2kb)	201	TGME49_329200	141
TGME49_230940	Promoter (<=1kb)	191	117					TGME49_297340	Promoter (<=1kb)	182	TGME49_329200	100
TGME49_295945	Exon (TGME49_295935-t26_1/TGME49_295935	814	336					TGME49_304490	Promoter (<=1kb)	93	TGME49_329800	482
TGME49_266890	Promoter (<=1kb)	242	727					TGME49_202010	Promoter (<=1kb)	287	TGME49_330000	211
TGME49_242570	Promoter (<=1kb)	402	168					TGME49_244726	Promoter (<=1kb)	335	TGME49_457320	187
TGME49_261450	Promoter (<=1kb)	66	518					TGME49_232160	Promoter (1-2kb)	581	TGME49_457350	309
TGME49_232260	Promoter (<=1kb)	191	23					TGME49_301470	Promoter (<=1kb)	198	TGME49_457380	246
TGME49_221460	Promoter (<=1kb)	774	134					TGME49_257330	Promoter (<=1kb)	157	TGME49_457380	231
TGME49_213910	Promoter (<=1kb)	8	153					TGME49_248925	Promoter (<=1kb)	116	TGME49_457390	292
TGME49_309570	Promoter (<=1kb)	159	97					TGME49_306330	Promoter (<=1kb)	245	TGME49_457400	1560
TGME49_316710	Promoter (<=1kb)	227	4					TGME49_278760	Promoter (<=1kb)	101	TGME49_457430	339
TGME49_278090	Promoter (<=1kb)	43	162					TGME49_277500	Promoter (<=1kb)	380	TGME49_457430	87
TGME49_316130	Promoter (<=1kb)	1354	186					TGME49_222180	Promoter (<=1kb)	524	TGME49_457440	444
TGME49_307810	Promoter (<=1kb)	347	265					TGME49_238500	Promoter (<=1kb)	224	TGME49_457480	87
TGME49_266040	Promoter (<=1kb)	245	183					TGME49_301400	5' UTR	161	TGME49_457490	1034
TGME49_269330	Promoter (<=1kb)	4	54					TGME49_220270	Promoter (<=1kb)	179	TGME49_457530	141
TGME49_292260	Promoter (<=1kb)	570	297					TGME49_240880	Promoter (1-2kb)	238	TGME49_457540	239
TGME49_319330	Promoter (<=1kb)	261	497					TGME49_213380	Promoter (1-2kb)	178	TGME49_457570	92
TGME49_268380	Promoter (1-2kb)	635	321					TGME49_322800	Promoter (<=1kb)	911	TGME49_457580	15
TGME49_316590	Promoter (<=1kb)	1713	318					TGME49_293260	Promoter (<=1kb)	59	TGME49_457580	210
TGME49_247440	Promoter (1-2kb)	251	490					TGME49_306235	Promoter (<=1kb)	152	TGME49_457590	681
TGME49_257030	Promoter (<=1kb)	623	287					TGME49_266460	Promoter (<=1kb)	270	TGME49_457600	389
TGME49_288570	Distal Intergenic	118	0					TGME49_306060	Promoter (<=1kb)	97	TGME49_457610	262
TGME49_244530	Promoter (<=1kb)	808	19					TGME49_316620	Promoter (<=1kb)	108	TGME49_457620	506
TGME49_240890	Downstream (<=300bp)	600	244					TGME49_232370	Promoter (1-2kb)	169	TGME49_457640	572
TGME49_272520	Promoter (<=1kb)	526	1					TGME49_239260	Promoter (<=1kb)	305	TGME49_457640	474
TGME49_248480	Promoter (<=1kb)	463	93					TGME49_223570	Promoter (<=1kb)	166	TGME49_457650	313
TGME49_203800	Promoter (<=1kb)	117	113					TGME49_243378	Promoter (<=1kb)	440	TGME49_457660	1017
TGME49_286450	Promoter (<=1kb)	773	1296					TGME49_253510	Promoter (<=1kb)	254	TGME49_457690	450
TGME49_260440	Promoter (<=1kb)	1379	292					TGME49_219660	Promoter (<=1kb)	94	TGME49_457730	365
TGME49_232840	Promoter (<=1kb)	6	6					TGME49_211720	Promoter (<=1kb)	204	TGME49_457740	471
TGME49_214970	Promoter (<=1kb)	398	164					TGME49_314430	Promoter (<=1kb)	453	TGME49_457750	491
TGME49_223830	Promoter (1-2kb)	784	7					TGME49_264940	Promoter (<=1kb)	323	TGME49_457760	806
TGME49_300990	Promoter (<=1kb)	1525	1002					TGME49_217720	Promoter (<=1kb)	117	TGME49_457800	1437
TGME49_213480	Distal Intergenic	177	204					TGME49_226068	Promoter (<=1kb)	118	TGME49_457850	293
TGME49_306235	Promoter (<=1kb)	565	279					TGME49_259040	Promoter (<=1kb)	151	TGME49_457880	535
TGME49_214560	Promoter (<=1kb)	267	189					TGME49_217350	Promoter (1-2kb)	339	TGME49_457920	338
TGME49_275330	Promoter (<=1kb)	263	727					TGME49_228395	Promoter (1-2kb)	97	TGME49_457930	321
TGME49_213350	Promoter (<=1kb)	214	14					TGME49_231400	Promoter (<=1kb)	197	TGME49_457930	472
TGME49_278670	Promoter (<=1kb)	63	252					TGME49_238490	Promoter (<=1kb)	119	TGME49_457960	400
TGME49_261230	Distal Intergenic	302	117					TGME49_263100	Promoter (<=1kb)	148	TGME49_457970	43
TGME49_263070	Promoter (<=1kb)	228	149					TGME49_319540	Promoter (<=1kb)	810	TGME49_457980	224
TGME49_286500	Promoter (<=1kb)	189	41					TGME49_278757	Promoter (<=1kb)	200	TGME49_457990	809
TGME49_318170	Promoter (<=1kb)	251	95					TGME49_246090	Promoter (<=1kb)	408	TGME49_458010	217
TGME49_218410	Promoter (<=1kb)	188	507					TGME49_305120	Promoter (<=1kb)	442	TGME49_458010	863
TGME49_276950	Promoter (<=1kb)	438	91					TGME49_260380	Promoter (<=1kb)	212	TGME49_458020	242
TGME49_218790	Promoter (<=1kb)	84	141					TGME49_305630	Promoter (1-2kb)	385	TGME49_458030	67
TGME49_228200	Promoter (<=1kb)	289	156					TGME49_270890	Promoter (<=1kb)	210	TGME49_458040	460
TGME49_283540	Promoter (<=1kb)	206	402					TGME49_265520	Promoter (<=1kb)	116	TGME49_458050	310
TGME49_247040	Promoter (<=1kb)	953	319					TGME49_257770	Promoter (1-2kb)	80	TGME49_458060	259
TGME49_258480	Promoter (<=1kb)	202	117					TGME49_262620	Promoter (<=1kb)	479	TGME49_458080	1437
TGME49_237015	Promoter (<=1kb)	589	812					TGME49_261450	Promoter (<=1kb)	115	TGME49_458090	414
TGME49_237880	Promoter (<=1kb)	572	174					TGME49_284180	Promoter (1-2kb)	78	TGME49_458120	1040
TGME49_277260	Promoter (<=1kb)	2267	387					TGME49_318230	Promoter (<=1kb)	116	TGME49_458150	460
TGME49_268600	Exon (TGME49_268600-t26_1/TGME49_268600	213	141					TGME49_271375	Promoter (<=1kb)	406	TGME49_458190	473
TGME49_304490	Promoter (<=1kb)	257	957					TGME49_212780	Promoter (<=1kb)	122	TGME49_458200	237
TGME49_215580	Promoter (<=1kb)	802	227					TGME49_203060	Promoter (<=1kb)	1020	TGME49_458230	290
TGME49_218370	Promoter (<=1kb)	238	408					TGME49_275690	Promoter (<=1kb)	119	TGME49_458260	827
TGME49_217520	3' UTR	115	166					TGME49_263090	Promoter (<=1kb)	91	TGME49_458280	851
TGME49_297820	Promoter (1-2kb)	249	230					TGME49_297880	Promoter (<=1kb)	112	TGME49_458320	721
TGME49_267585	Promoter (1-2kb)	213	248					TGME49_221900	Promoter (<=1kb)	156	TGME49_458340	1189
TGME49_301150	Promoter (<=1kb)	234	189					TGME49_293480	Promoter (1-2kb)	196	TGME49_458350	529
TGME49_226850	Promoter (<=1kb)	274	184					TGME49_226940	Promoter (<=1kb)	181	TGME49_458360	1198
TGME49_306550	Promoter (<=1kb)	5	92					TGME49_243680	Promoter (<=1kb)	186	TGME49_458370	550
TGME49_281920	3' UTR	368	77					TGME49_225905	Promoter (<=1kb)	251	TGME49_458380	113
TGME49_273980	Promoter (<=1kb)	628	1440					TGME49_268200	Distal Intergenic	237	TGME49_458390	353
TGME49_224750	Promoter (<=1kb)	468	253					TGME49_249365	Promoter (<=1kb)	442	TGME49_458410	981
TGME49_288945	Promoter (<=1kb)	268	39					TGME49_219810	Promoter (1-2kb)	131	TGME49_458420	494
TGME49_200360	Promoter (<=1kb)	78	671					TGME49_207350	Distal Intergenic	127	TGME49_458430	512
TGME49_244440	Promoter (<=1kb)	919	226					TGME49_279420	Promoter (<=1kb)	104	TGME49_458450	1112
TGME49_272520	Promoter (<=1kb)	66	69					TGME49_255220	Promoter (<=1kb)	579	TGME49_458510	435
TGME49_255260	Promoter (<=1kb)	891	176					TGME49_261300	Promoter (<=1kb)	862	TGME49_458520	838
TGME49_264790	Promoter (<=1kb)	617	670					TGME49_274290	Distal Intergenic	224	TGME49_458530	258
TGME49_263220	Promoter (<=1kb)	805	805					TGME49_214800	Promoter (<=1kb)	185	TGME49_458540	271
TGME49_218510	Promoter (<=1kb)	542	135					TGME49_261075	Promoter (<=1kb)	109	TGME49_458590	276
TGME49_269680	Exon (TGME49_269680-t26_1/TGME49_269680	289	198					TGME49_209050	Promoter (1-2kb)	876	TGME49_458600	249
TGME49_266920	Promoter (<=1kb)	216	355					TGME49_264485	5' UTR	189	TGME49_458620	376
TGME49_243440	Promoter (<=1kb)	230	16					TGME49_250360	Promoter (<=1kb)	360	TGME49_458630	213
TGME49_270720	Promoter (1-2kb)	7	62					TGME49_312450	Promoter (<=1kb)	140	TGME49_458640	854
TGME49_263310	Promoter (<=1kb)	174	360					TGME49_269885	Promoter (<=1kb)	245	TGME49_458650	188
TGME49_278400	Promoter (<=1kb)	46	139					TGME49_315570	Promoter (<=1kb)	191	TGME49_458660	73
TGME49_208722	Promoter (1-2kb)	86	155					TGME49_202770	Promoter (1-2kb)	114	TGME49_458670	270
TGME49_270170	Promoter (<=1kb)	487	217					TGME49_218300	Promoter (1-2kb)	348	TGME49_458670	304
TGME49_224950	Promoter (<=1kb)	201	255					TGME49_267585	Promoter (1-2kb)	278	TGME49_458680	360
TGME49_320090	Promoter (1-2kb)	265	238					TGME49_300613	Promoter (<=1kb)	217	TGME49_458700	864
TGME49_304930	Intron (TGME49_304955-t26_1/TGME49_304955	428	277					TGME49_208560	Promoter (<=1kb)	485	TGME49_458710	325
TGME49_210690	Promoter (<=1kb)	189	62					TGME49_236290	Promoter (1-2kb)	272	TGME49_458710	192
TGME49_204315	Promoter (<=1kb)	312	167					TGME49_214220	Promoter (<=1kb)	176	TGME49_458740	767
TGME49_212300	Promoter (<=1kb)	243	268					TGME49_297725	Promoter (<=1kb)	350	TGME49_458760	769
TGME49_271960	Promoter (<=1kb)	303	1037					TGME49_241240	Promoter (<=1kb)	99	TGME49_458770	150
TGME49_209240	Promoter (<=1kb)	910	1					TGME49_270760	Promoter (1-2kb)	68	TGME49_458780	536
TGME49_278770	Promoter (<=1kb)	655	126					TGME49_274120	Promoter (1-2kb)	121	TGME49_458790	474
TGME49_261710	Promoter (<=1kb)	783	479					TGME49_250710	Promoter (1-2kb)	226	TGME49_458800	777
TGME49_314430	Promoter (1-2kb)	246	186					TGME49_250800	Promoter (<=1kb)	254	TGME49_458810	911
TGME49_269180	Promoter (<=1kb)	659	363					TGME49_219485	Promoter (<=1kb)	251	TGME49_458830	687
TGME49_293750	Promoter (<=1kb)	91	976					TGME49_240810	Promoter (<=1kb)	205	TGME49_458860	169
TGME49_224670	Exon (TGME49_224670-t26_1/TGME49_224670	16	75					TGME49_221340	5' UTR	40	TGME49_458910	633
TGME49_213830	Promoter (1-2kb)	239	158					TGME49_299240	Promoter (1-2kb)	121	TGME49_458920	208
TGME49_249950	Promoter (<=1kb)	51	236					TGME49_233140	Promoter (<=1kb)	425	TGME49_458930	1479
TGME49_201820	Promoter (<=1kb)	199	356					TGME49_250880	Promoter (<=1kb)	238	TGME49_458940	446
TGME49_224000	Promoter (<=1kb)	467	850					TGME49_263480	Promoter (<=1kb)	217	TGME49_458950	841
TGME49_210270	Promoter (<=1kb)	684	328					TGME49_233940	Promoter (<=1kb)	190	TGME49_458960	470
TGME49_220600	Promoter (<=1kb)	413	6					TGME49_307030	Promoter (<=1kb)	244	TGME49_458970	727
TGME49_209440	Promoter (<=1kb)	27	164					TGME49_281960	Promoter (<=1kb)	390	TGME49_459020	314
TGME49_216460	Promoter (<=1kb)	54	190					TGME49_259830	Promoter (<=1kb)	202	TGME49_459030	104
TGME49_271930	Promoter (<=1kb)	265	1057					TGME49_247530	Promoter (<=1kb)	185	TGME49_459060	65
TGME49_318525	Promoter (<=1kb)	600	7					TGME49_217400	Promoter (<=1kb)	113	TGME49_459070	706
TGME49_315730	Exon (TGME49_315730-t26_1/TGME49_315730	67	273					TGME49_311230	Promoter (<=1kb)	201	TGME49_459080	463
TGME49_269920	Promoter (<=1kb)	298	221					TGME49_208030	Promoter (<=1kb)	233	TGME49_459090	330
TGME49_321450	Promoter (<=1kb)	158	8					TGME49_293300	Promoter (<=1kb)	81	TGME49_459130	296
TGME49_240900	Promoter (<=1kb)	1023	55					TGME49_244560	Promoter (<=1kb)	81	TGME49_459140	1170
TGME49_309600	Promoter (1-2kb)	117	95					TGME49_222350	Promoter (<=1kb)	198	TGME49_459150	339
TGME49_233450	Promoter (<=1kb)	642	385					TGME49_320150	Promoter (<=1kb)	344	TGME49_459180	951
TGME49_291310	Promoter (<=1kb)	316	245					TGME49_300048	Promoter (<=1kb)	338	TGME49_459190	253
TGME49_314055	Promoter (1-2kb)	309	29					TGME49_260540	Promoter (<=1kb)	178	TGME49_459200	242
TGME49_295935	Exon (TGME49_295920-t26_1/TGME49_295920	241	264					TGME49_316260	Promoter (<=1kb)	161	TGME49_459200	196
TGME49_262560	Promoter (<=1kb)	327	412					TGME49_284310	Promoter (<=1kb)	147	TGME49_459220	945
TGME49_311890	Promoter (<=1kb)	323	10					TGME49_294980	Promoter (<=1kb)	61	TGME49_459230	552
TGME49_238010	Distal Intergenic	239	339					TGME49_243330	Distal Intergenic	178	TGME49_459240	250
TGME49_235630	Distal Intergenic	304	8					TGME49_235380	Promoter (<=1kb)	391	TGME49_459260	338
TGME49_265110	Promoter (<=1kb)	59	116					TGME49_309250	Promoter (<=1kb)	114	TGME49_459270	228
TGME49_226030	Promoter (<=1kb)	147	35					TGME49_270050	Promoter (1-2kb)	175	TGME49_459280	569
TGME49_318400	Promoter (<=1kb)	210	741					TGME49_216530	Promoter (<=1kb)	245	TGME49_459300	292
TGME49_222170	Promoter (<=1kb)	443	174					TGME49_286000	Promoter (<=1kb)	288	TGME49_459340	381
TGME49_243545	Promoter (<=1kb)	670	1264					TGME49_295760	Promoter (<=1kb)	183	TGME49_459350	258
TGME49_209030	Promoter (<=1kb)	727	1435					TGME49_310760	Promoter (<=1kb)	90	TGME49_459400	1574
TGME49_216770	Promoter (<=1kb)	44	59					TGME49_209095	Promoter (<=1kb)	161	TGME49_459410	338
TGME49_250670	Promoter (1-2kb)	397	185					TGME49_281930	Promoter (<=1kb)	341	TGME49_459450	360
TGME49_266920	Exon (TGME49_266920-t26_1/TGME49_266920	140	261					TGME49_216020	Promoter (<=1kb)	223	TGME49_459460	337
TGME49_222870	Promoter (<=1kb)	189	79					TGME49_289370	Promoter (<=1kb)	101	TGME49_459460	409
TGME49_235630	Promoter (<=1kb)	172	131					TGME49_228760	Promoter (<=1kb)	160	TGME49_459480	247
TGME49_266600	Promoter (1-2kb)	1	115					TGME49_201240	Promoter (<=1kb)	154	TGME49_459490	490
TGME49_267060	Promoter (<=1kb)	202	212					TGME49_234450	Promoter (<=1kb)	90	TGME49_459560	1012
TGME49_217890	3' UTR	509	79					TGME49_249720	Promoter (<=1kb)	483	TGME49_459570	533
TGME49_311480	Promoter (<=1kb)	500	250					TGME49_255450	Promoter (<=1kb)	275	TGME49_459590	728
TGME49_254390	Promoter (1-2kb)	88	138					TGME49_224800	Promoter (<=1kb)	420	TGME49_459600	668
TGME49_281900	Promoter (<=1kb)	240	220					TGME49_276980	Promoter (<=1kb)	149	TGME49_459610	230
TGME49_310090	Promoter (<=1kb)	539	691					TGME49_271460	Promoter (<=1kb)	570	TGME49_459620	442
TGME49_228480	Promoter (<=1kb)	192	252					TGME49_261240	Promoter (<=1kb)	349	TGME49_459630	395
TGME49_249540	Promoter (<=1kb)	46	364					TGME49_306410	Promoter (<=1kb)	747	TGME49_459660	806
TGME49_304880	Promoter (<=1kb)	563	8					TGME49_265790	Promoter (<=1kb)	273	TGME49_459670	242
TGME49_263590	Promoter (<=1kb)	1159	29					TGME49_272710	Promoter (1-2kb)	522	TGME49_459680	1023
TGME49_236153	Promoter (<=1kb)	423	83					TGME49_310640	Promoter (<=1kb)	168	TGME49_459700	343
TGME49_205180	Distal Intergenic	243	131					TGME49_224940	Promoter (<=1kb)	175	TGME49_459830	293
TGME49_232400	Promoter (<=1kb)	580	224					TGME49_219720	3' UTR	434	TGME49_459840	785
TGME49_266920	Promoter (<=1kb)	188	219					TGME49_253880	Promoter (<=1kb)	171	TGME49_459860	768
TGME49_215350	Promoter (<=1kb)	315	266					TGME49_204280	Promoter (<=1kb)	226	TGME49_459920	263
TGME49_235315	Promoter (<=1kb)	390	342					TGME49_292260	Promoter (<=1kb)	220	TGME49_459930	484
TGME49_217420	Promoter (<=1kb)	652	240					TGME49_306890	Promoter (<=1kb)	204	TGME49_459940	691
TGME49_266960	Exon (TGME49_266950-t26_1/TGME49_266950	167	320					TGME49_220900	Promoter (<=1kb)	85	TGME49_459950	370
TGME49_308860	Promoter (<=1kb)	473	261					TGME49_268240	Promoter (<=1kb)	137	TGME49_459960	839
TGME49_311485	Promoter (<=1kb)	83	216					TGME49_312490	Promoter (<=1kb)	359	TGME49_459970	817
TGME49_315500	Promoter (<=1kb)	229	402					TGME49_293810	Promoter (<=1kb)	274	TGME49_460000	446
TGME49_227615	Promoter (<=1kb)	663	324					TGME49_254870	Promoter (<=1kb)	484	TGME49_460010	409
TGME49_229960	Promoter (<=1kb)	292	145					TGME49_266990	Promoter (<=1kb)	213	TGME49_460020	310
TGME49_265330	Promoter (<=1kb)	112	173					TGME49_221210	Promoter (<=1kb)	331	TGME49_460020	310
TGME49_234230	3' UTR	358	262					TGME49_313900	Distal Intergenic	147	TGME49_460080	587
TGME49_255700	Promoter (1-2kb)	60	71					TGME49_288400	Promoter (1-2kb)	117	TGME49_460110	767
TGME49_219560	Promoter (<=1kb)	7	35					TGME49_235670	Promoter (<=1kb)	77	TGME49_460120	449
TGME49_203980	Promoter (<=1kb)	1708	214					TGME49_200600	Promoter (<=1kb)	80	TGME49_460130	220
TGME49_272440	Promoter (1-2kb)	73	87					TGME49_280700	Promoter (<=1kb)	108	TGME49_460140	754
TGME49_244030	Promoter (1-2kb)	230	233					TGME49_300641	Promoter (<=1kb)	71	TGME49_460150	1207
TGME49_219540	Promoter (<=1kb)	19	76					TGME49_226220	Promoter (<=1kb)	261	TGME49_460160	363
TGME49_233230	Promoter (<=1kb)	381	404					TGME49_283740	Promoter (<=1kb)	155	TGME49_460170	324
TGME49_321680	Promoter (<=1kb)	290	298					TGME49_247440	Promoter (<=1kb)	153	TGME49_460180	173
TGME49_318510	Promoter (<=1kb)	616	49					TGME49_289380	Promoter (<=1kb)	70	TGME49_460180	185
TGME49_208440	Promoter (1-2kb)	612	491					TGME49_212190	Promoter (1-2kb)	274	TGME49_460200	459
TGME49_213020	Promoter (<=1kb)	807	298					TGME49_301330	Promoter (<=1kb)	149	TGME49_460220	209
TGME49_232340	Promoter (<=1kb)	818	279					TGME49_302009	Promoter (<=1kb)	92	TGME49_460240	232
TGME49_215890	3' UTR	314	399					TGME49_211730	Promoter (<=1kb)	393	TGME49_460250	364
TGME49_214950	Promoter (<=1kb)	176	227					TGME49_210270	Promoter (<=1kb)	232	TGME49_460250	231
TGME49_221265	3' UTR	134	373					TGME49_295105	Promoter (<=1kb)	175	TGME49_460260	250
TGME49_260620	Promoter (<=1kb)	321	502					TGME49_321170	Distal Intergenic	156	TGME49_460260	175
TGME49_202770	Promoter (<=1kb)	1844	87					TGME49_261470	Promoter (<=1kb)	161	TGME49_460270	330
TGME49_244180	Promoter (1-2kb)	126	5					TGME49_283870	Distal Intergenic	229	TGME49_460280	185
TGME49_202680	Promoter (<=1kb)	562	411					TGME49_256990	Promoter (<=1kb)	74	TGME49_460300	160
TGME49_264225	Promoter (<=1kb)	248	151					TGME49_295730	Distal Intergenic	245	TGME49_460310	790
TGME49_220470	Promoter (<=1kb)	275	253					TGME49_233770	Promoter (<=1kb)	177	TGME49_460320	422
TGME49_301240	Promoter (1-2kb)	436	714					TGME49_257680	Promoter (1-2kb)	213	TGME49_460330	257
TGME49_276170	Promoter (<=1kb)	894	14					TGME49_287230	Promoter (<=1kb)	99	TGME49_460340	402
TGME49_309835	Promoter (<=1kb)	376	230					TGME49_264080	Promoter (<=1kb)	148	TGME49_460350	218
TGME49_213950	Promoter (<=1kb)	241	247					TGME49_300140	Promoter (<=1kb)	93	TGME49_460400	311
TGME49_255420	Promoter (<=1kb)	1070	285					TGME49_312310	Promoter (<=1kb)	370	TGME49_460410	403
TGME49_237110	Promoter (<=1kb)	169	15					TGME49_257430	Promoter (<=1kb)	105	TGME49_460420	385
TGME49_262400	Promoter (1-2kb)	303	345					TGME49_236850	Promoter (<=1kb)	143	TGME49_460430	254
TGME49_272380	Promoter (<=1kb)	432	266					TGME49_269700	Promoter (1-2kb)	94	TGME49_460450	831
TGME49_290000	Promoter (<=1kb)	113	467					TGME49_206430	Promoter (1-2kb)	316	TGME49_460460	304
TGME49_268870	Exon (TGME49_268870-t26_1/TGME49_268870	106	65					TGME49_201120	Promoter (1-2kb)	104	TGME49_460470	446
TGME49_241180	Promoter (<=1kb)	112	156					TGME49_271590	Promoter (1-2kb)	187	TGME49_460480	396
TGME49_271625	Promoter (<=1kb)	174	284					TGME49_299000	Promoter (<=1kb)	241	TGME49_460550	188
TGME49_254940	Promoter (<=1kb)	426	133					TGME49_293620	Promoter (<=1kb)	200	TGME49_460560	308
TGME49_294820	Exon (TGME49_294820-t26_1/TGME49_294820	483	202					TGME49_212970	Promoter (<=1kb)	324	TGME49_460570	569
TGME49_240240	Promoter (<=1kb)	1455	272					TGME49_316480	Promoter (<=1kb)	344	TGME49_460580	247
TGME49_301400	Promoter (<=1kb)	373	36					TGME49_312100	Promoter (<=1kb)	100	TGME49_460600	510
TGME49_247440	3' UTR	282	301					TGME49_321270	Distal Intergenic	241	TGME49_460610	886
TGME49_201780	Promoter (<=1kb)	410	159					TGME49_223150	Promoter (1-2kb)	131	TGME49_460620	323
TGME49_238480	Promoter (<=1kb)	147	63					TGME49_278840	Promoter (1-2kb)	106	TGME49_460630	857
TGME49_206590	Promoter (<=1kb)	281	189					TGME49_209450	Promoter (<=1kb)	195	TGME49_460650	199
TGME49_250220	Promoter (<=1kb)	627	233					TGME49_311100	Promoter (<=1kb)	369	TGME49_460670	337
TGME49_266080	Promoter (<=1kb)	339	301					TGME49_284645	Promoter (<=1kb)	230	TGME49_460680	298
TGME49_287480	Promoter (1-2kb)	401	66					TGME49_219310	Promoter (<=1kb)	553	TGME49_460680	133
TGME49_270700	Promoter (1-2kb)	177	6					TGME49_249340	Promoter (1-2kb)	94	TGME49_460720	306
TGME49_270680	Promoter (<=1kb)	753	567					TGME49_281910	Promoter (<=1kb)	52	TGME49_460720	165
TGME49_226470	Promoter (1-2kb)	225	43					TGME49_295035	Downstream (<=300bp)	142	TGME49_460730	468
TGME49_265530	Promoter (<=1kb)	981	192					TGME49_221400	Promoter (<=1kb)	409	TGME49_460780	548
TGME49_227580	Promoter (<=1kb)	401	103					TGME49_238020	Promoter (<=1kb)	105	TGME49_460790	198
TGME49_224350	Promoter (<=1kb)	347	189					TGME49_214440	Promoter (<=1kb)	45	TGME49_460800	838
TGME49_246540	Promoter (<=1kb)	2	231					TGME49_231150	Promoter (<=1kb)	174	TGME49_460810	355
TGME49_202580	Promoter (<=1kb)	787	120					TGME49_296950	Distal Intergenic	222	TGME49_460820	355
TGME49_276940	Promoter (<=1kb)	245	330					TGME49_288740	Promoter (<=1kb)	171	TGME49_460830	596
TGME49_238440	Promoter (<=1kb)	291	6					TGME49_311240	Promoter (<=1kb)	460	TGME49_460880	109
TGME49_295100	Promoter (1-2kb)	319	249					TGME49_283870	Distal Intergenic	894	TGME49_460880	948
TGME49_247530	Promoter (<=1kb)	365	42					TGME49_222220	Promoter (<=1kb)	325	TGME49_460890	511
TGME49_293710	Promoter (<=1kb)	87	81					TGME49_313422	Promoter (<=1kb)	222	TGME49_460900	534
TGME49_233450	Promoter (1-2kb)	6	116					TGME49_207350	Distal Intergenic	190	TGME49_460910	149
TGME49_318120	Promoter (<=1kb)	121	170					TGME49_313848	Promoter (1-2kb)	132	TGME49_460920	402
TGME49_277240	Promoter (1-2kb)	464	638					TGME49_276230	Distal Intergenic	216	TGME49_460930	327
TGME49_227150	Promoter (<=1kb)	57	437					TGME49_240070	Promoter (<=1kb)	148	TGME49_460970	190
TGME49_284645	Promoter (<=1kb)	50	196					TGME49_224460	Promoter (<=1kb)	70	TGME49_461040	381
TGME49_311100	Promoter (<=1kb)	577	281					TGME49_257755	Promoter (<=1kb)	128	TGME49_461070	462
TGME49_273960	Promoter (<=1kb)	140	86					TGME49_229020	Promoter (1-2kb)	99	TGME49_461080	385
TGME49_310060	Promoter (<=1kb)	409	371					TGME49_295620	Promoter (<=1kb)	148	TGME49_461110	514
TGME49_257560	Promoter (<=1kb)	239	282					TGME49_261970	Promoter (<=1kb)	133	TGME49_461140	625
TGME49_276820	Promoter (1-2kb)	303	139					TGME49_304450	Promoter (<=1kb)	228	TGME49_461150	541
TGME49_269300	Promoter (<=1kb)	1002	151					TGME49_246070	Promoter (<=1kb)	102	TGME49_461180	317
TGME49_306060	Promoter (<=1kb)	885	58					TGME49_262440	Promoter (1-2kb)	101	TGME49_461200	404
TGME49_223810	Promoter (<=1kb)	171	7					TGME49_264160	Promoter (1-2kb)	195	TGME49_461210	217
TGME49_215440	Promoter (<=1kb)	54	255					TGME49_209045	Promoter (1-2kb)	66	TGME49_461210	1058
TGME49_273760	Promoter (<=1kb)	373	443					TGME49_218362	Promoter (<=1kb)	103	TGME49_461220	274
TGME49_288640	3' UTR	295	333					TGME49_205615	Promoter (<=1kb)	39	TGME49_461230	510
TGME49_290330	Promoter (<=1kb)	429	429					TGME49_247300	3' UTR	111	TGME49_461250	533
TGME49_314310	Promoter (1-2kb)	133	319					TGME49_200250	Promoter (<=1kb)	168	TGME49_461270	659
TGME49_259270	Promoter (<=1kb)	93	174					TGME49_264710	Promoter (<=1kb)	310	TGME49_461280	216
TGME49_222240	Promoter (<=1kb)	188	521					TGME49_290340	3' UTR	72	TGME49_461280	173
TGME49_276920	Exon (TGME49_276920-t26_1/TGME49_276920	296	158					TGME49_270010	Promoter (<=1kb)	282	TGME49_461300	385
TGME49_243930	Promoter (<=1kb)	1669	186					TGME49_238850	Promoter (<=1kb)	280	TGME49_461350	179
TGME49_249890	Promoter (1-2kb)	4	47					TGME49_276890	Promoter (<=1kb)	86	TGME49_461360	213
TGME49_219450	Promoter (<=1kb)	81	232					TGME49_289970	Promoter (<=1kb)	85	TGME49_461380	951
TGME49_220630	Promoter (1-2kb)	641	353					TGME49_238380	Promoter (<=1kb)	189	TGME49_461410	399
TGME49_296000	Promoter (<=1kb)	312	199					TGME49_254480	3' UTR	244	TGME49_461480	170
TGME49_301890	Promoter (<=1kb)	333	229					TGME49_246182	Promoter (<=1kb)	146	TGME49_461480	221
TGME49_260500	Promoter (1-2kb)	365	167					TGME49_308980	Promoter (<=1kb)	111	TGME49_461480	228
TGME49_278990	Promoter (<=1kb)	238	205					TGME49_315140	Promoter (<=1kb)	41	TGME49_461500	348
TGME49_293690	Promoter (<=1kb)	516	562					TGME49_316530	Promoter (<=1kb)	103	Intergenic	157
TGME49_220460	Promoter (<=1kb)	430	545					TGME49_273090	Promoter (<=1kb)	180	Intergenic	593
TGME49_258220	Promoter (1-2kb)	128	137					TGME49_278740	Promoter (<=1kb)	66	Intergenic	57
TGME49_202650	Promoter (<=1kb)	77	181					TGME49_249870	Promoter (<=1kb)	76	Intergenic	653
TGME49_201390	Promoter (1-2kb)	358	285					TGME49_265100	3' UTR	222	Intergenic	8
TGME49_208550	Promoter (<=1kb)	680	76					TGME49_285810	Promoter (<=1kb)	477	Intergenic	336
TGME49_204440	Promoter (<=1kb)	190	138					TGME49_215195	3' UTR	156	Intergenic	285
TGME49_309210	3' UTR	207	2					TGME49_273120	Promoter (<=1kb)	144	Intergenic	102
TGME49_203540	Promoter (<=1kb)	549	295					TGME49_315190	Promoter (<=1kb)	135	Intergenic	281
TGME49_267585	Promoter (<=1kb)	348	235					TGME49_208800	Promoter (<=1kb)	103	Intergenic	2
TGME49_202290	Promoter (<=1kb)	508	36					TGME49_308950	Promoter (<=1kb)	74	Intergenic	61
TGME49_226290	Promoter (<=1kb)	438	380					TGME49_210950	3' UTR	527	Intergenic	1023
TGME49_253690	Promoter (<=1kb)	91	87					TGME49_299970	Promoter (1-2kb)	292	Intergenic	244
TGME49_300350	Promoter (<=1kb)	451	138					TGME49_300230	3' UTR	198	Intergenic	19
TGME49_235600	Exon (TGME49_235610-t26_1/TGME49_235610	4	100					TGME49_278365	Distal Intergenic	524	Intergenic	33
TGME49_228160	Exon (TGME49_228160-t26_1/TGME49_228160	73	4					TGME49_203770	Promoter (<=1kb)	118	Intergenic	947
TGME49_246720	Promoter (<=1kb)	101	320					TGME49_273370	Distal Intergenic	536	Intergenic	934
TGME49_202010	Promoter (<=1kb)	412	289					TGME49_214970	Promoter (<=1kb)	23	Intergenic	702
TGME49_237140	Promoter (<=1kb)	197	252					TGME49_205290	Promoter (<=1kb)	90	Intergenic	8
TGME49_292300	Promoter (1-2kb)	245	148					TGME49_258470	Promoter (<=1kb)	132	Intergenic	389
TGME49_312330	Promoter (<=1kb)	260	253					TGME49_225130	Promoter (<=1kb)	190	Intergenic	119
TGME49_212190	Promoter (1-2kb)	231	49					TGME49_262450	Promoter (1-2kb)	163	Intergenic	316
TGME49_355220	Promoter (<=1kb)	189	285					TGME49_216000	Promoter (<=1kb)	181	Intergenic	727
TGME49_291860	Promoter (<=1kb)	228	395					TGME49_313190	Promoter (<=1kb)	336	Intergenic	151
TGME49_312420	Promoter (<=1kb)	498	560					TGME49_220060	Distal Intergenic	75	Intergenic	90
TGME49_248140	Promoter (<=1kb)	95	289					TGME49_205140	Promoter (<=1kb)	320	Intergenic	81
TGME49_310490	Promoter (<=1kb)	163	200					TGME49_307015	Promoter (<=1kb)	252	Intergenic	79
TGME49_246120	Promoter (<=1kb)	1094	316					TGME49_237540	Promoter (1-2kb)	129	Intergenic	64
TGME49_212310	3' UTR	48	156					TGME49_210678	Promoter (<=1kb)	243	Intergenic	351
TGME49_212230	Promoter (<=1kb)	140	94					TGME49_213460	Distal Intergenic	304	Intergenic	256
TGME49_215955	Promoter (1-2kb)	209	234					TGME49_262430	Distal Intergenic	168	Intergenic	235
TGME49_211630	Promoter (<=1kb)	2	222					TGME49_249030	Promoter (<=1kb)	209	Intergenic	769
TGME49_237270	Promoter (<=1kb)	211	460					TGME49_236650	Promoter (1-2kb)	113	Intergenic	338
TGME49_268225	Promoter (<=1kb)	118	57					TGME49_260330	Promoter (<=1kb)	108	Intergenic	915
TGME49_265360	Promoter (<=1kb)	80	46					TGME49_224250	Promoter (<=1kb)	159	Intergenic	209
TGME49_232050	Promoter (<=1kb)	269	217					TGME49_242435	3' UTR	52	Intergenic	30
TGME49_239440	Promoter (<=1kb)	6	222					TGME49_297780	Promoter (1-2kb)	231	Intergenic	121
TGME49_204050	Promoter (<=1kb)	46	42					TGME49_312175	Promoter (1-2kb)	307	Intergenic	668
TGME49_301400	Promoter (<=1kb)	665	207					TGME49_288800	Promoter (1-2kb)	224	Intergenic	146
TGME49_249365	Promoter (<=1kb)	445	293					TGME49_271080	Promoter (1-2kb)	148	Intergenic	382
TGME49_316310	Promoter (<=1kb)	85	194					TGME49_240090	Promoter (<=1kb)	199	Intergenic	257
TGME49_236550	Promoter (<=1kb)	103	155					TGME49_267150	Promoter (1-2kb)	374	Intergenic	167
TGME49_248180	Promoter (<=1kb)	390	118					TGME49_262110	Promoter (1-2kb)	212	Intergenic	84
TGME49_316580	Promoter (<=1kb)	776	238					TGME49_289900	Promoter (1-2kb)	60	Intergenic	243
TGME49_312690	Promoter (<=1kb)	201	149					TGME49_295040	Promoter (<=1kb)	411	Intergenic	1355
TGME49_287040	Promoter (<=1kb)	321	332					TGME49_319740	Promoter (1-2kb)	215	Intergenic	248
TGME49_233220	Promoter (1-2kb)	297	296					TGME49_306570	Downstream (<=300bp)	304	Intergenic	56
TGME49_293700	Promoter (1-2kb)	291	139					TGME49_233500	Promoter (1-2kb)	97	Intergenic	24
TGME49_238490	Promoter (<=1kb)	378	484					TGME49_219550	Promoter (<=1kb)	111	Intergenic	357
TGME49_254460	Promoter (<=1kb)	114	214					TGME49_213480	Distal Intergenic	343	Intergenic	302
TGME49_266620	Promoter (<=1kb)	320	524					TGME49_270160	Distal Intergenic	159	Intergenic	84
TGME49_288620	3' UTR	138	3					TGME49_313010	Promoter (<=1kb)	155	Intergenic	725
TGME49_205290	Promoter (1-2kb)	36	134					TGME49_265050	Promoter (1-2kb)	76	Intergenic	189
TGME49_213460	Distal Intergenic	284	90					TGME49_306060	Promoter (1-2kb)	115	Intergenic	1158
TGME49_291940	Intron (TGME49_291930-t26_1/TGME49_291930	123	124					TGME49_243250	Promoter (1-2kb)	114	Intergenic	154
TGME49_307270	3' UTR	42	229					TGME49_237840	3' UTR	170	Intergenic	369
TGME49_269950	Promoter (<=1kb)	272	197					TGME49_320770	Distal Intergenic	122	Intergenic	232
TGME49_228175	Promoter (<=1kb)	96	251					TGME49_240860	3' UTR	175	Intergenic	144
TGME49_220060	Distal Intergenic	211	136					TGME49_232360	Distal Intergenic	189	Intergenic	428
TGME49_248460	Promoter (<=1kb)	28	285					TGME49_273870	Promoter (<=1kb)	107	Intergenic	762
TGME49_298090	Distal Intergenic	205	10					TGME49_270790	Promoter (<=1kb)	172	Intergenic	8
TGME49_269690	Promoter (<=1kb)	406	561					TGME49_279355	Distal Intergenic	227	Intergenic	191
TGME49_316410	Promoter (1-2kb)	232	210					TGME49_292170	Promoter (1-2kb)	176	Intergenic	125
TGME49_234460	Promoter (<=1kb)	568	371					TGME49_257470	Promoter (<=1kb)	179	Intergenic	561
TGME49_288740	Promoter (<=1kb)	198	262					TGME49_313590	Promoter (1-2kb)	160	Intergenic	362
TGME49_321470	Promoter (<=1kb)	190	172					TGME49_228050	3' UTR	75	Intergenic	261
TGME49_220520	Promoter (1-2kb)	238	42					TGME49_206380	Promoter (<=1kb)	51	Intergenic	1086
TGME49_234550	Promoter (1-2kb)	165	115					TGME49_284040	Promoter (<=1kb)	183	Intergenic	223
TGME49_315270	Promoter (<=1kb)	522	224					TGME49_262470	Promoter (<=1kb)	338	Intergenic	404
TGME49_210820	Promoter (<=1kb)	326	268					TGME49_230470	Promoter (<=1kb)	514	Intergenic	160
TGME49_273330	Promoter (1-2kb)	4	79					TGME49_249910	Promoter (<=1kb)	90	Intergenic	570
TGME49_222060	Exon (TGME49_222060-t26_1/TGME49_222060	4	165					TGME49_310630	Promoter (1-2kb)	118	Intergenic	249
TGME49_264160	Distal Intergenic	58	455					TGME49_247510	Promoter (<=1kb)	50	Intergenic	756
TGME49_329710	Distal Intergenic	0	4					TGME49_271220	Promoter (<=1kb)	214	Intergenic	181
TGME49_219810	Promoter (<=1kb)	624	247					TGME49_245760	Promoter (<=1kb)	36	Intergenic	580
TGME49_209485	3' UTR	225	95					TGME49_267308	Promoter (1-2kb)	98	Intergenic	173
TGME49_269860	Exon (TGME49_269885-t26_1/TGME49_269885	40	122					TGME49_217182	Promoter (<=1kb)	67	Intergenic	347
TGME49_226470	Distal Intergenic	144	4					TGME49_277500	3' UTR	157	Intergenic	440
TGME49_239430	Promoter (<=1kb)	1236	635					TGME49_203540	Distal Intergenic	311	Intergenic	87
TGME49_241840	Promoter (<=1kb)	909	198					TGME49_223270	Promoter (<=1kb)	188	Intergenic	337
TGME49_257685	Promoter (<=1kb)	783	107					TGME49_227860	Promoter (<=1kb)	57	Intergenic	574
TGME49_319520	Promoter (<=1kb)	439	80					TGME49_224710	Promoter (<=1kb)	256	Intergenic	218
TGME49_236650	Promoter (1-2kb)	349	231					TGME49_229390	Promoter (<=1kb)	344	Intergenic	1067
TGME49_306035	Promoter (<=1kb)	299	465					TGME49_253750	Promoter (1-2kb)	142	Intergenic	183
TGME49_218240	Promoter (<=1kb)	153	205					TGME49_261440	Promoter (<=1kb)	138	Intergenic	388
TGME49_283780	Promoter (<=1kb)	746	289					TGME49_202470	Promoter (<=1kb)	98	Intergenic	706
TGME49_236040	Promoter (<=1kb)	634	48					TGME49_213940	Promoter (1-2kb)	184	Intergenic	265
TGME49_314450	3' UTR	344	271					TGME49_200480	Distal Intergenic	106	Intergenic	72
TGME49_266620	Exon (TGME49_266610-t26_1/TGME49_266610	244	310					TGME49_269050	Promoter (<=1kb)	41	Intergenic	89
TGME49_273490	Promoter (<=1kb)	97	229					TGME49_224770	Promoter (<=1kb)	218	Intergenic	459
TGME49_239870	Promoter (<=1kb)	543	399					TGME49_207430	Promoter (<=1kb)	166	Intergenic	92
TGME49_207050	Promoter (<=1kb)	749	727					TGME49_321530	Promoter (<=1kb)	69	Intergenic	1027
TGME49_310040	Promoter (<=1kb)	337	4					TGME49_301150	Promoter (<=1kb)	578	Intergenic	119
TGME49_204300	Exon (TGME49_204300-t26_1/TGME49_204300	391	167					TGME49_259570	Promoter (<=1kb)	241	Intergenic	113
TGME49_200130	Distal Intergenic	266	260					TGME49_238895	Promoter (<=1kb)	197	Intergenic	317
TGME49_233140	Distal Intergenic	333	6					TGME49_203358	Promoter (<=1kb)	153	Intergenic	48
TGME49_214430	Promoter (<=1kb)	87	7					TGME49_224150	Promoter (<=1kb)	398	Intergenic	168
TGME49_205310	Promoter (<=1kb)	211	184					TGME49_316900	Distal Intergenic	305	Intergenic	99
TGME49_246170	5' UTR	356	89					TGME49_214840	3' UTR	82	Intergenic	175
TGME49_204020	Promoter (<=1kb)	656	287					TGME49_207770	Distal Intergenic	308	Intergenic	102
TGME49_281530	3' UTR	288	175					TGME49_260400	Promoter (1-2kb)	219	Intergenic	496
TGME49_249030	Promoter (<=1kb)	82	149					TGME49_265255	Distal Intergenic	392	Intergenic	76
TGME49_297340	Promoter (1-2kb)	1145	170					TGME49_214190	Promoter (<=1kb)	458	Intergenic	217
TGME49_218730	Promoter (<=1kb)	336	26					TGME49_212090	Promoter (1-2kb)	273	Intergenic	368
TGME49_316670	Promoter (<=1kb)	444	57					TGME49_269180	Promoter (1-2kb)	327	Intergenic	204
TGME49_268800	Promoter (<=1kb)	246	895					TGME49_311650	Promoter (<=1kb)	52	Intergenic	70
TGME49_203560	Distal Intergenic	286	185					TGME49_230350	Promoter (1-2kb)	44	Intergenic	147
TGME49_310010	Promoter (<=1kb)	360	222					TGME49_329100	Distal Intergenic	147	Intergenic	70
TGME49_217555	Downstream (<=300bp)	413	347					TGME49_212950	Promoter (<=1kb)	20	Intergenic	413
TGME49_212275	Promoter (1-2kb)	206	62					TGME49_213480	3' UTR	64	Intergenic	879
TGME49_214870	Distal Intergenic	355	469					TGME49_241150	3' UTR	330	Intergenic	84
TGME49_257580	Promoter (1-2kb)	344	16					TGME49_259870	Promoter (1-2kb)	175	Intergenic	412
TGME49_271985	Promoter (1-2kb)	235	142					TGME49_257730	Promoter (<=1kb)	286	Intergenic	422
TGME49_319870	Promoter (1-2kb)	0	126					TGME49_269035	Promoter (1-2kb)	119	Intergenic	184
TGME49_201230	Promoter (<=1kb)	312	177					TGME49_318640	3' UTR	31	Intergenic	198
TGME49_202290	Promoter (1-2kb)	85	307					TGME49_220930	Promoter (<=1kb)	215	Intergenic	401
TGME49_261440	Promoter (<=1kb)	430	422					TGME49_215260	Promoter (<=1kb)	193	Intergenic	139
TGME49_227390	Promoter (<=1kb)	419	170					TGME49_270340	Promoter (<=1kb)	233	Intergenic	68
TGME49_310880	Promoter (<=1kb)	170	127					TGME49_286420	Promoter (<=1kb)	225	Intergenic	216
TGME49_239830	Promoter (<=1kb)	227	378					TGME49_230910	Distal Intergenic	221	Intergenic	366
TGME49_287500	Promoter (<=1kb)	289	5					TGME49_205558	Distal Intergenic	105	Intergenic	93
TGME49_292180	Promoter (<=1kb)	156	235					TGME49_285860	Promoter (<=1kb)	278	Intergenic	499
TGME49_205700	Promoter (<=1kb)	153	159					TGME49_234670	Promoter (<=1kb)	122	Intergenic	98
TGME49_206360	Promoter (<=1kb)	93	142					TGME49_208830	Promoter (<=1kb)	252	Intergenic	196
TGME49_205060	Exon (TGME49_205050-t26_1/TGME49_205050	1	370					TGME49_255720	Promoter (1-2kb)	301	Intergenic	145
TGME49_251490	Promoter (<=1kb)	203	102					TGME49_316430	Promoter (<=1kb)	12	Intergenic	191
TGME49_220060	Distal Intergenic	329	135					TGME49_297830	Promoter (1-2kb)	407	Intergenic	131
TGME49_298000	Promoter (<=1kb)	252	183					TGME49_269740	Downstream (<=300bp)	127	Intergenic	82
TGME49_253110	Distal Intergenic	153	691					TGME49_220330	Promoter (<=1kb)	208	Intergenic	117
TGME49_232230	Promoter (<=1kb)	209	79					TGME49_271310	Distal Intergenic	197	Intergenic	744
TGME49_211910	Promoter (<=1kb)	240	1					TGME49_267390	Promoter (<=1kb)	338	Intergenic	182
TGME49_291910	Promoter (1-2kb)	8	76					TGME49_294010	Promoter (<=1kb)	360	Intergenic	291
TGME49_244450	Promoter (<=1kb)	7	0					TGME49_268430	Promoter (<=1kb)	125	Intergenic	165
TGME49_318650	3' UTR	221	233					TGME49_223725	Promoter (1-2kb)	162	Intergenic	529
TGME49_295035	Distal Intergenic	26	104					TGME49_230140	Promoter (1-2kb)	50	Intergenic	737
TGME49_234670	Promoter (<=1kb)	214	232					TGME49_301180	Promoter (<=1kb)	34	Intergenic	51
TGME49_231815	Promoter (1-2kb)	224	4					TGME49_222180	Promoter (<=1kb)	179	Intergenic	179
TGME49_202040	Promoter (<=1kb)	1255	362					TGME49_210600	Promoter (<=1kb)	222	Intergenic	847
TGME49_320600	Promoter (<=1kb)	797	321					TGME49_234990	Distal Intergenic	90	Intergenic	118
TGME49_253440	Distal Intergenic	242	2					TGME49_254420	Promoter (<=1kb)	120	Intergenic	86
TGME49_240680	Promoter (1-2kb)	205	203					TGME49_247570	Promoter (1-2kb)	186	Intergenic	158
TGME49_288300	Promoter (<=1kb)	112	239					TGME49_315510	Promoter (<=1kb)	230	Intergenic	187
TGME49_310885	Promoter (<=1kb)	46	3					TGME49_284530	Promoter (<=1kb)	271	Intergenic	293
TGME49_290960	Exon (TGME49_290960-t26_1/TGME49_290960	240	295					TGME49_234310	Promoter (<=1kb)	183	Intergenic	145
TGME49_240230	3' UTR	0	35					TGME49_223540	Promoter (<=1kb)	176	Intergenic	166
TGME49_246500	Promoter (<=1kb)	245	318					TGME49_253380	Promoter (<=1kb)	180	Intergenic	514
TGME49_207780	Promoter (<=1kb)	204	2					TGME49_206470	3' UTR	10	Intergenic	333
TGME49_225230	3' UTR	251	0					TGME49_265250	Promoter (1-2kb)	57	Intergenic	0
TGME49_255450	Promoter (1-2kb)	7	196					TGME49_269660	Promoter (<=1kb)	4	Intergenic	385
TGME49_321270	Distal Intergenic	23	6					TGME49_252510	Promoter (1-2kb)	104	Intergenic	211
TGME49_234680	Promoter (<=1kb)	626	329					TGME49_295980	Promoter (<=1kb)	396	Intergenic	4
TGME49_318640	Exon (TGME49_318640-t26_1/TGME49_318640	4	419					TGME49_318880	Promoter (<=1kb)	71	Intergenic	442
TGME49_309590	Promoter (<=1kb)	381	266					TGME49_320180	Promoter (<=1kb)	194	Intergenic	520
TGME49_233030	Promoter (1-2kb)	238	173					TGME49_270310	Promoter (<=1kb)	243	Intergenic	151
TGME49_235460	Promoter (<=1kb)	664	915					TGME49_264160	Distal Intergenic	245	Intergenic	37
TGME49_232950	Promoter (<=1kb)	219	2					TGME49_234270	Promoter (<=1kb)	276	Intergenic	156
TGME49_255230	Promoter (<=1kb)	1025	122					TGME49_306930	Promoter (<=1kb)	249	Intergenic	346
TGME49_239590	3' UTR	194	7					TGME49_223258	Distal Intergenic	227	Intergenic	290
TGME49_253490	Promoter (<=1kb)	287	233					TGME49_242270	Promoter (<=1kb)	83	Intergenic	289
TGME49_257800	Exon (TGME49_257800-t26_1/TGME49_257800	443	5					TGME49_276820	Distal Intergenic	166	Intergenic	226
TGME49_261650	Intron (TGME49_261650-t26_1/TGME49_261650	204	120					TGME49_202780	Promoter (<=1kb)	377	Intergenic	43
TGME49_321490	Promoter (<=1kb)	243	80					TGME49_219630	Promoter (1-2kb)	340	Intergenic	212
TGME49_249030	Promoter (<=1kb)	24	306					TGME49_276180	Promoter (<=1kb)	236	Intergenic	340
TGME49_205640	Promoter (<=1kb)	251	272					TGME49_257670	Promoter (<=1kb)	134	Intergenic	50
TGME49_286610	Promoter (<=1kb)	0	276					TGME49_232040	Distal Intergenic	210	Intergenic	22
TGME49_250500	3' UTR	524	723					TGME49_204270	Promoter (<=1kb)	153	Intergenic	221
TGME49_258820	Promoter (<=1kb)	3	213					TGME49_229710	3' UTR	66	Intergenic	689
TGME49_249535	Promoter (1-2kb)	227	368					TGME49_312065	Promoter (1-2kb)	112	Intergenic	2
								TGME49_248750	Promoter (<=1kb)	167	Intergenic	220
								TGME49_228780	Distal Intergenic	157	Intergenic	572
								TGME49_272200	Promoter (<=1kb)	372	Intergenic	68
								TGME49_310620	Promoter (1-2kb)	198	Intergenic	59
								TGME49_286720	Promoter (1-2kb)	284	Intergenic	367
								TGME49_238170	Promoter (<=1kb)	40	Intergenic	155
								TGME49_293368	Promoter (1-2kb)	125	Intergenic	329
								TGME49_309410	Downstream (<=300bp)	315	Intergenic	238
								TGME49_260600	Promoter (1-2kb)	239	Intergenic	165
								TGME49_300680	Promoter (1-2kb)	374	Intergenic	197
								TGME49_306430	Promoter (1-2kb)	300	Intergenic	500
								TGME49_300700	Promoter (<=1kb)	71	Intergenic	784
								TGME49_223550	Promoter (1-2kb)	338	Intergenic	598
								TGME49_249780	Promoter (<=1kb)	46	Intergenic	305
								TGME49_308965	Promoter (<=1kb)	157	Intergenic	245
								TGME49_208820	Promoter (<=1kb)	239	Intergenic	1270
								TGME49_274700	Distal Intergenic	69	Intergenic	270
								TGME49_233340	Promoter (<=1kb)	182	Intergenic	474
								TGME49_226072	3' UTR	51	Intergenic	286
								TGME49_278600	Promoter (<=1kb)	68	Intergenic	228
								TGME49_226110	Promoter (<=1kb)	101	Intergenic	828
								TGME49_204290	Promoter (1-2kb)	308	Intergenic	89
								TGME49_211360	Promoter (1-2kb)	402	Intergenic	1079
								TGME49_217720	Promoter (<=1kb)	34	Intergenic	26
								TGME49_238995	Promoter (1-2kb)	245	Intergenic	126
								TGME49_252200	Promoter (<=1kb)	504	Intergenic	78
								TGME49_310970	Promoter (<=1kb)	15	Intergenic	665
								TGME49_238860	Promoter (<=1kb)	23	Intergenic	980
								TGME49_306550	Promoter (<=1kb)	9	Intergenic	322
								TGME49_228290	Promoter (<=1kb)	33	Intergenic	127
								TGME49_289540	Promoter (<=1kb)	47	Intergenic	207
								TGME49_213020	Promoter (<=1kb)	28	Intergenic	384
								TGME49_242625	Promoter (<=1kb)	173	Intergenic	16
								TGME49_297220	Promoter (<=1kb)	158	Intergenic	166
								TGME49_289350	Promoter (<=1kb)	754	Intergenic	254
								TGME49_243570	3' UTR	65	Intergenic	495
								TGME49_227810	Promoter (<=1kb)	345	Intergenic	122
								TGME49_257580	Promoter (1-2kb)	138	Intergenic	124
								TGME49_288700	Promoter (1-2kb)	12	Intergenic	758
								TGME49_260990	Promoter (1-2kb)	276	Intergenic	225
								TGME49_216830	Promoter (1-2kb)	27	Intergenic	221
								TGME49_319880	Promoter (1-2kb)	230	Intergenic	79
								TGME49_254390	Promoter (1-2kb)	132	Intergenic	160
								TGME49_314690	Promoter (<=1kb)	200	Intergenic	104
								TGME49_214440	Promoter (1-2kb)	142	Intergenic	443
								TGME49_205310	Promoter (<=1kb)	83	Intergenic	244
								TGME49_313740	Distal Intergenic	108	Intergenic	338
								TGME49_211630	3' UTR	46	Intergenic	171
								TGME49_258640	Distal Intergenic	40	Intergenic	188
								TGME49_217850	Promoter (<=1kb)	142	Intergenic	69
								TGME49_222948	Promoter (<=1kb)	199	Intergenic	38
								TGME49_310390	3' UTR	11	Intergenic	156
								TGME49_243545	Promoter (<=1kb)	104	Intergenic	0
								TGME49_221230	Promoter (1-2kb)	304	Intergenic	89
								TGME49_208070	Distal Intergenic	334	Intergenic	226
								TGME49_321530	Promoter (<=1kb)	275	Intergenic	665
								TGME49_234220	Promoter (<=1kb)	273	Intergenic	349
								TGME49_318130	Distal Intergenic	567	Intergenic	348
								TGME49_316780	Distal Intergenic	178	Intergenic	239
								TGME49_306350	Promoter (<=1kb)	3	Intergenic	122
								TGME49_293630	Distal Intergenic	213	Intergenic	567
								TGME49_277720	Promoter (<=1kb)	9	Intergenic	32
								TGME49_222340	3' UTR	72	Intergenic	129
								TGME49_215670	Promoter (<=1kb)	164	Intergenic	278
								TGME49_234670	Promoter (<=1kb)	238	Intergenic	198
								TGME49_219738	Promoter (<=1kb)	174	Intergenic	169
								TGME49_238490	Promoter (<=1kb)	149	Intergenic	171
								TGME49_314650	Downstream (<=300bp)	206	Intergenic	283
								TGME49_231370	Promoter (<=1kb)	80	Intergenic	478
								TGME49_260310	Promoter (<=1kb)	589	Intergenic	245
								TGME49_262430	Promoter (<=1kb)	440	Intergenic	184
								TGME49_290980	Promoter (1-2kb)	201	Intergenic	400
								TGME49_244560	3' UTR	24	Intergenic	184
								TGME49_204080	3' UTR	178	Intergenic	112
								TGME49_285980	Promoter (<=1kb)	57	Intergenic	146
								TGME49_241305	Distal Intergenic	281	Intergenic	176
								TGME49_309380	Promoter (<=1kb)	193	Intergenic	138
								TGME49_210690	Promoter (1-2kb)	253	Intergenic	171
								TGME49_249440	Promoter (<=1kb)	46	Intergenic	975
								TGME49_269710	Promoter (1-2kb)	90	Intergenic	169
								TGME49_297710	Promoter (<=1kb)	3	Intergenic	169
								TGME49_266380	Promoter (1-2kb)	257	Intergenic	186
								TGME49_250720	Promoter (1-2kb)	351	Intergenic	571
								TGME49_242090	Promoter (<=1kb)	630	Intergenic	605
								TGME49_247410	3' UTR	255	Intergenic	220
								TGME49_216540	Promoter (1-2kb)	61	Intergenic	215
								TGME49_314780	Promoter (<=1kb)	18	Intergenic	115
								TGME49_312820	Distal Intergenic	40	Intergenic	66
								TGME49_207880	Promoter (1-2kb)	310	Intergenic	151
								TGME49_208550	3' UTR	18	Intergenic	217
								TGME49_316900	Distal Intergenic	277	Intergenic	209
								TGME49_213550	Promoter (<=1kb)	232	Intergenic	182
								TGME49_315830	Promoter (1-2kb)	259	Intergenic	205
								TGME49_201270	Promoter (<=1kb)	105	Intergenic	397
								TGME49_214840	Promoter (<=1kb)	129	Intergenic	533
								TGME49_283490	Distal Intergenic	269	Intergenic	164
								TGME49_224630	3' UTR	282	Intergenic	101
								TGME49_298590	Promoter (1-2kb)	247	Intergenic	481
								TGME49_211710	Promoter (<=1kb)	5	Intergenic	294
								TGME49_252620	Promoter (<=1kb)	375	Intergenic	59
								TGME49_203320	Promoter (<=1kb)	137	Intergenic	845
								TGME49_209130	Promoter (<=1kb)	285	Intergenic	284
								TGME49_235905	Distal Intergenic	300	Intergenic	221
								TGME49_258770	Promoter (1-2kb)	17	Intergenic	40
								TGME49_310160	Promoter (<=1kb)	262	Intergenic	196
								TGME49_202650	Promoter (<=1kb)	14	Intergenic	157
								TGME49_273340	Promoter (1-2kb)	84	Intergenic	717
								TGME49_309070	Promoter (<=1kb)	295	Intergenic	43
								TGME49_276230	Distal Intergenic	395	Intergenic	94
								TGME49_217490	Promoter (1-2kb)	73	Intergenic	190
								TGME49_218940	Promoter (<=1kb)	518	Intergenic	404
								TGME49_220620	3' UTR	1	Intergenic	283
								TGME49_316900	Distal Intergenic	434	Intergenic	68
								TGME49_295140	Promoter (1-2kb)	0	Intergenic	96
								TGME49_269930	Promoter (1-2kb)	154	Intergenic	218
								TGME49_222220	Promoter (<=1kb)	13	Intergenic	331
								TGME49_219690	Distal Intergenic	217	Intergenic	1025
								TGME49_290650	Promoter (<=1kb)	250	Intergenic	359
								TGME49_231900	Promoter (1-2kb)	580	Intergenic	2
								TGME49_286740	Promoter (<=1kb)	281	Intergenic	545
								TGME49_269990	Distal Intergenic	59	Intergenic	110
								TGME49_285140	Promoter (1-2kb)	232	Intergenic	187
								TGME49_290150	Promoter (<=1kb)	47	Intergenic	72
								TGME49_220900	Promoter (1-2kb)	0	Intergenic	738
								TGME49_200290	Promoter (<=1kb)	349	Intergenic	16
								TGME49_316635	3' UTR	3	Intergenic	439
								TGME49_241000	Promoter (<=1kb)	285	Intergenic	393
								TGME49_224940	Promoter (<=1kb)	1	Intergenic	117
								TGME49_216155	Promoter (<=1kb)	259	Intergenic	370
								TGME49_233000	Promoter (1-2kb)	166	Intergenic	214
								TGME49_252255	Distal Intergenic	276	Intergenic	764
								TGME49_216375	Promoter (1-2kb)	250	Intergenic	538
								TGME49_269630	Distal Intergenic	368	Intergenic	233
								TGME49_286595	Promoter (<=1kb)	255	Intergenic	406
											Intergenic	220
											Intergenic	695
											Intergenic	86
											Intergenic	54
											Intergenic	423
											Intergenic	30
											Intergenic	338
											Intergenic	275
											Intergenic	378
											Intergenic	219
											Intergenic	882
											Intergenic	227
											Intergenic	116
											Intergenic	342
											Intergenic	345
											Intergenic	125
											Intergenic	163
											Intergenic	127
											Intergenic	154
											Intergenic	553
											Intergenic	267
											Intergenic	344
											Intergenic	173
											Intergenic	197
											Intergenic	420
											Intergenic	935
											Intergenic	208
											Intergenic	205
											Intergenic	24
											Intergenic	57
											Intergenic	151
											Intergenic	209
											Intergenic	533
											Intergenic	150
											Intergenic	241
											Intergenic	29
											Intergenic	578
											Intergenic	83
											Intergenic	83
											Intergenic	268
											Intergenic	93
											Intergenic	824
											Intergenic	408
											Intergenic	119
											Intergenic	57
											Intergenic	1055
											Intergenic	894
											Intergenic	301
											Intergenic	352
											Intergenic	1199
											Intergenic	101
											Intergenic	76
											Intergenic	407
											Intergenic	44
											Intergenic	84
											Intergenic	191
											TGME49_200290	143
											TGME49_201860	31
											TGME49_203705	1548
											TGME49_204540	3
											TGME49_205130	456
											TGME49_207410	201
											TGME49_207840	182
											TGME49_207865	117
											TGME49_209100	27
											TGME49_209250	154
											TGME49_209870	201
											TGME49_209880	510
											TGME49_212310	656
											TGME49_213072	7
											TGME49_213445	222
											TGME49_215290	190
											TGME49_215500	8
											TGME49_215910	1115
											TGME49_217020	364
											TGME49_218340	197
											TGME49_218370	11
											TGME49_219230	108
											TGME49_219650	164
											TGME49_219650	100
											TGME49_219690	1025
											TGME49_219810	231
											TGME49_220170	139
											TGME49_220280	66
											TGME49_220740	189
											TGME49_221380	185
											TGME49_221830	171
											TGME49_221905	1046
											TGME49_222110	1075
											TGME49_222440	705
											TGME49_223855	398
											TGME49_224830	355
											TGME49_225120	228
											TGME49_225680	63
											TGME49_226830	194
											TGME49_226980	164
											TGME49_227020	502
											TGME49_227335	287
											TGME49_228990	422
											TGME49_229780	73
											TGME49_230160	327
											TGME49_230220	127
											TGME49_230380	402
											TGME49_230940	450
											TGME49_231125	528
											TGME49_232170	160
											TGME49_232180	45
											TGME49_232250	525
											TGME49_232380	130
											TGME49_235183	164
											TGME49_235315	46
											TGME49_235690	273
											TGME49_236040	712
											TGME49_236070	252
											TGME49_236400	440
											TGME49_237130	1097
											TGME49_237170	10
											TGME49_237170	241
											TGME49_237230	442
											TGME49_238440	318
											TGME49_239270	660
											TGME49_239410	76
											TGME49_243930	193
											TGME49_244020	339
											TGME49_244320	49
											TGME49_244700	321
											TGME49_246210	664
											TGME49_246490	26
											TGME49_250670	452
											TGME49_253350	67
											TGME49_253430	472
											TGME49_254020	197
											TGME49_254660	327
											TGME49_254915	648
											TGME49_255060	733
											TGME49_255710	181
											TGME49_258220	195
											TGME49_258870	216
											TGME49_260825	56
											TGME49_261018	78
											TGME49_261650	41
											TGME49_262670	234
											TGME49_263060	400
											TGME49_263090	345
											TGME49_263740	232
											TGME49_263850	21
											TGME49_264140	637
											TGME49_265420	121
											TGME49_266368	472
											TGME49_266950	387
											TGME49_268230	212
											TGME49_268260	123
											TGME49_268280	183
											TGME49_271375	215
											TGME49_272600	307
											TGME49_273100	40
											TGME49_274170	111
											TGME49_275320	162
											TGME49_276940	8
											TGME49_278110	149
											TGME49_278245	455
											TGME49_278245	28
											TGME49_278770	345
											TGME49_278830	75
											TGME49_280070	53
											TGME49_280400	284
											TGME49_280490	433
											TGME49_280660	1168
											TGME49_281400	704
											TGME49_289350	217
											TGME49_291960	266
											TGME49_292390	145
											TGME49_293370	36
											TGME49_293740	150
											TGME49_294200	436
											TGME49_294630	301
											TGME49_295710	267
											TGME49_295935	1034
											TGME49_296950	410
											TGME49_297800	51
											TGME49_297820	234
											TGME49_298600	269
											TGME49_299900	181
											TGME49_301240	855
											TGME49_304930	117
											TGME49_304955	644
											TGME49_305030	424
											TGME49_306310	250
											TGME49_307030	166
											TGME49_308840	673
											TGME49_309330	77
											TGME49_309352	348
											TGME49_309730	49
											TGME49_309770	416
											TGME49_309980	229
											TGME49_310960	8
											TGME49_311230	262
											TGME49_311300	277
											TGME49_311335	178
											TGME49_311375	536
											TGME49_312905	650
											TGME49_313660	65
											TGME49_313840	244
											TGME49_315660	98
											TGME49_316540	143
											TGME49_318650	350
											TGME49_319870	116
											TGME49_319870	69
											TGME49_321620	233
											TGME49_323000	372
											TGME49_323500	174
											TGME49_323500	92
											TGME49_323500	135
											TGME49_328900	212
											TGME49_328900	159
											TGME49_329000	229
											TGME49_329000	328
											TGME49_329000	175
											TGME49_329000	31
											TGME49_329000	166
											TGME49_329200	177
											TGME49_329200	222
											TGME49_329200	588
											TGME49_329300	286
											TGME49_329300	131
											TGME49_329300	217
											TGME49_329300	414
											TGME49_329300	805
											AP2XII-2_peak1000	226
											AP2XII-2_peak1001	163
											AP2XII-2_peak1002	334
											AP2XII-2_peak1003	91
											AP2XII-2_peak1004	203
											AP2XII-2_peak1005	408
											AP2XII-2_peak1006	279
											AP2XII-2_peak1007	418
											AP2XII-2_peak1008	36
											AP2XII-2_peak1009	73
											AP2XII-2_peak1010	308
											AP2XII-2_peak1011	97
											AP2XII-2_peak1012	229
											AP2XII-2_peak1013	0
											AP2XII-2_peak1014	261
											AP2XII-2_peak1015	133
											AP2XII-2_peak1016	127
											AP2XII-2_peak1017	354
											AP2XII-2_peak1018	135
											AP2XII-2_peak1019	543
											AP2XII-2_peak1020	172
											AP2XII-2_peak1021	135
											AP2XII-2_peak1022	207
											AP2XII-2_peak1023	111
											AP2XII-2_peak1024	138
											AP2XII-2_peak1025	153
											AP2XII-2_peak1026	48
											AP2XII-2_peak1027	642
											AP2XII-2_peak1028	133
											AP2XII-2_peak1029	179
											AP2XII-2_peak1030	667
											AP2XII-2_peak1031	385
											AP2XII-2_peak1032	44
											AP2XII-2_peak1033	52
											AP2XII-2_peak1034	111
											AP2XII-2_peak1035	150
											AP2XII-2_peak1036	204
											AP2XII-2_peak1037	281
											AP2XII-2_peak1038	229
											AP2XII-2_peak1039	134
											AP2XII-2_peak1040	107
											AP2XII-2_peak1041	173
											AP2XII-2_peak1042	188
											AP2XII-2_peak1043	194
											AP2XII-2_peak1044	182
											AP2XII-2_peak1045	165
											AP2XII-2_peak1046	176
											AP2XII-2_peak1047	240
											AP2XII-2_peak1048	10
											AP2XII-2_peak1049	179
											AP2XII-2_peak1050	118
											AP2XII-2_peak1051	237
											AP2XII-2_peak1052	346
											AP2XII-2_peak1053	146
											AP2XII-2_peak1054	648
											AP2XII-2_peak1055	251
											AP2XII-2_peak1056	516
											AP2XII-2_peak1057	98
											AP2XII-2_peak1058	678
											AP2XII-2_peak1059	211
											AP2XII-2_peak1060	423
											AP2XII-2_peak1061	327
											AP2XII-2_peak1062	311
											AP2XII-2_peak1063	201
											AP2XII-2_peak1064	196
											AP2XII-2_peak1065	240
											AP2XII-2_peak1066	845
											AP2XII-2_peak1067	502
											AP2XII-2_peak1068	5
											AP2XII-2_peak1069	345
											AP2XII-2_peak1070	368
											AP2XII-2_peak1071	557
											AP2XII-2_peak1072	174
											AP2XII-2_peak1073	349
											AP2XII-2_peak1074	779
											AP2XII-2_peak1075	142
											AP2XII-2_peak1076	225
											AP2XII-2_peak1077	381
											AP2XII-2_peak1078	162
											AP2XII-2_peak1079	113
											AP2XII-2_peak1080	661
											AP2XII-2_peak1081	412
											AP2XII-2_peak1082	123
											AP2XII-2_peak1083	160
											AP2XII-2_peak1084	368
											AP2XII-2_peak1085	704
											AP2XII-2_peak1086	139
											AP2XII-2_peak1087	201
											AP2XII-2_peak1088	251
											AP2XII-2_peak1089	545
											AP2XII-2_peak1090	548
											AP2XII-2_peak1091	398
											AP2XII-2_peak1092	206
											AP2XII-2_peak1093	72
											AP2XII-2_peak1094	203
											AP2XII-2_peak1095	32
											AP2XII-2_peak1096	257
											AP2XII-2_peak1097	80
											AP2XII-2_peak1098	599
											AP2XII-2_peak1099	124
											AP2XII-2_peak1100	170
											AP2XII-2_peak1101	150
											AP2XII-2_peak1102	379
											AP2XII-2_peak1103	294
											AP2XII-2_peak1104	87
											AP2XII-2_peak1105	387
											AP2XII-2_peak1106	265
											AP2XII-2_peak1107	119
											AP2XII-2_peak13	124
											AP2XII-2_peak136	92
											AP2XII-2_peak14	188
											AP2XII-2_peak143	303
											AP2XII-2_peak153	218
											AP2XII-2_peak162	141
											AP2XII-2_peak163	91
											AP2XII-2_peak165	153
											AP2XII-2_peak172	220
											AP2XII-2_peak175	279
											AP2XII-2_peak20	699
											AP2XII-2_peak205	56
											AP2XII-2_peak222	240
											AP2XII-2_peak223	945
											AP2XII-2_peak226	226
											AP2XII-2_peak230	264
											AP2XII-2_peak241	449
											AP2XII-2_peak25	730
											AP2XII-2_peak26	562
											AP2XII-2_peak262	226
											AP2XII-2_peak264	51
											AP2XII-2_peak269	400
											AP2XII-2_peak27	274
											AP2XII-2_peak270	262
											AP2XII-2_peak272	294
											AP2XII-2_peak273	607
											AP2XII-2_peak274	396
											AP2XII-2_peak275	305
											AP2XII-2_peak276	331
											AP2XII-2_peak28	208
											AP2XII-2_peak283	423
											AP2XII-2_peak284	524
											AP2XII-2_peak285	959
											AP2XII-2_peak286	505
											AP2XII-2_peak288	677
											AP2XII-2_peak289	193
											AP2XII-2_peak29	288
											AP2XII-2_peak290	220
											AP2XII-2_peak293	271
											AP2XII-2_peak294	865
											AP2XII-2_peak295	18
											AP2XII-2_peak296	107
											AP2XII-2_peak297	6
											AP2XII-2_peak298	263
											AP2XII-2_peak299	204
											AP2XII-2_peak30	393
											AP2XII-2_peak300	492
											AP2XII-2_peak301	1258
											AP2XII-2_peak302	868
											AP2XII-2_peak303	8
											AP2XII-2_peak304	166
											AP2XII-2_peak308	570
											AP2XII-2_peak309	147
											AP2XII-2_peak31	560
											AP2XII-2_peak310	446
											AP2XII-2_peak314	152
											AP2XII-2_peak315	15
											AP2XII-2_peak322	226
											AP2XII-2_peak328	226
											AP2XII-2_peak35	703
											AP2XII-2_peak352	256
											AP2XII-2_peak353	227
											AP2XII-2_peak36	731
											AP2XII-2_peak369	308
											AP2XII-2_peak37	532
											AP2XII-2_peak378	137
											AP2XII-2_peak38	437
											AP2XII-2_peak398	312
											AP2XII-2_peak414	220
											AP2XII-2_peak416	243
											AP2XII-2_peak431	388
											AP2XII-2_peak432	308
											AP2XII-2_peak46	573
											AP2XII-2_peak463	215
											AP2XII-2_peak464	590
											AP2XII-2_peak47	323
											AP2XII-2_peak479	186
											AP2XII-2_peak48	367
											AP2XII-2_peak480	202
											AP2XII-2_peak481	135
											AP2XII-2_peak482	559
											AP2XII-2_peak49	398
											AP2XII-2_peak492	170
											AP2XII-2_peak498	188
											AP2XII-2_peak50	364
											AP2XII-2_peak500	447
											AP2XII-2_peak501	85
											AP2XII-2_peak502	91
											AP2XII-2_peak504	260
											AP2XII-2_peak51	107
											AP2XII-2_peak515	143
											AP2XII-2_peak52	466
											AP2XII-2_peak53	61
											AP2XII-2_peak534	233
											AP2XII-2_peak535	40
											AP2XII-2_peak536	129
											AP2XII-2_peak537	50
											AP2XII-2_peak538	173
											AP2XII-2_peak539	344
											AP2XII-2_peak54	181
											AP2XII-2_peak540	227
											AP2XII-2_peak541	278
											AP2XII-2_peak549	144
											AP2XII-2_peak55	208
											AP2XII-2_peak550	350
											AP2XII-2_peak552	165
											AP2XII-2_peak553	208
											AP2XII-2_peak555	254
											AP2XII-2_peak556	158
											AP2XII-2_peak558	222
											AP2XII-2_peak559	206
											AP2XII-2_peak560	155
											AP2XII-2_peak561	69
											AP2XII-2_peak562	75
											AP2XII-2_peak563	186
											AP2XII-2_peak564	525
											AP2XII-2_peak565	70
											AP2XII-2_peak58	151
											AP2XII-2_peak587	87
											AP2XII-2_peak588	102
											AP2XII-2_peak595	678
											AP2XII-2_peak596	197
											AP2XII-2_peak597	707
											AP2XII-2_peak598	789
											AP2XII-2_peak599	428
											AP2XII-2_peak60	221
											AP2XII-2_peak600	306
											AP2XII-2_peak601	595
											AP2XII-2_peak602	719
											AP2XII-2_peak603	1918
											AP2XII-2_peak604	109
											AP2XII-2_peak605	146
											AP2XII-2_peak61	853
											AP2XII-2_peak612	456
											AP2XII-2_peak614	402
											AP2XII-2_peak615	60
											AP2XII-2_peak616	193
											AP2XII-2_peak617	200
											AP2XII-2_peak618	75
											AP2XII-2_peak619	559
											AP2XII-2_peak62	306
											AP2XII-2_peak620	144
											AP2XII-2_peak621	216
											AP2XII-2_peak622	310
											AP2XII-2_peak623	247
											AP2XII-2_peak624	219
											AP2XII-2_peak625	183
											AP2XII-2_peak626	93
											AP2XII-2_peak627	265
											AP2XII-2_peak628	333
											AP2XII-2_peak629	270
											AP2XII-2_peak630	31
											AP2XII-2_peak631	163
											AP2XII-2_peak632	188
											AP2XII-2_peak633	219
											AP2XII-2_peak634	470
											AP2XII-2_peak635	256
											AP2XII-2_peak636	214
											AP2XII-2_peak637	237
											AP2XII-2_peak638	536
											AP2XII-2_peak639	321
											AP2XII-2_peak64	473
											AP2XII-2_peak640	44
											AP2XII-2_peak641	173
											AP2XII-2_peak642	518
											AP2XII-2_peak643	28
											AP2XII-2_peak644	275
											AP2XII-2_peak645	129
											AP2XII-2_peak646	52
											AP2XII-2_peak647	145
											AP2XII-2_peak648	271
											AP2XII-2_peak649	209
											AP2XII-2_peak650	699
											AP2XII-2_peak651	596
											AP2XII-2_peak652	444
											AP2XII-2_peak653	151
											AP2XII-2_peak654	122
											AP2XII-2_peak655	220
											AP2XII-2_peak656	404
											AP2XII-2_peak657	330
											AP2XII-2_peak658	126
											AP2XII-2_peak659	315
											AP2XII-2_peak660	132
											AP2XII-2_peak661	260
											AP2XII-2_peak662	8
											AP2XII-2_peak663	39
											AP2XII-2_peak664	153
											AP2XII-2_peak665	162
											AP2XII-2_peak666	124
											AP2XII-2_peak667	188
											AP2XII-2_peak668	122
											AP2XII-2_peak669	72
											AP2XII-2_peak670	148
											AP2XII-2_peak671	208
											AP2XII-2_peak672	253
											AP2XII-2_peak673	258
											AP2XII-2_peak674	174
											AP2XII-2_peak675	154
											AP2XII-2_peak676	383
											AP2XII-2_peak677	444
											AP2XII-2_peak678	240
											AP2XII-2_peak679	206
											AP2XII-2_peak680	146
											AP2XII-2_peak681	875
											AP2XII-2_peak682	590
											AP2XII-2_peak683	199
											AP2XII-2_peak684	369
											AP2XII-2_peak685	74
											AP2XII-2_peak686	394
											AP2XII-2_peak687	113
											AP2XII-2_peak688	146
											AP2XII-2_peak689	116
											AP2XII-2_peak690	196
											AP2XII-2_peak691	319
											AP2XII-2_peak692	431
											AP2XII-2_peak693	209
											AP2XII-2_peak694	170
											AP2XII-2_peak695	247
											AP2XII-2_peak696	206
											AP2XII-2_peak697	97
											AP2XII-2_peak698	169
											AP2XII-2_peak699	305
											AP2XII-2_peak700	153
											AP2XII-2_peak701	364
											AP2XII-2_peak702	171
											AP2XII-2_peak703	120
											AP2XII-2_peak704	248
											AP2XII-2_peak705	126
											AP2XII-2_peak706	773
											AP2XII-2_peak707	198
											AP2XII-2_peak708	65
											AP2XII-2_peak709	145
											AP2XII-2_peak710	329
											AP2XII-2_peak711	108
											AP2XII-2_peak712	168
											AP2XII-2_peak713	61
											AP2XII-2_peak714	472
											AP2XII-2_peak715	59
											AP2XII-2_peak716	40
											AP2XII-2_peak717	47
											AP2XII-2_peak718	87
											AP2XII-2_peak719	189
											AP2XII-2_peak720	94
											AP2XII-2_peak721	585
											AP2XII-2_peak722	399
											AP2XII-2_peak723	364
											AP2XII-2_peak724	476
											AP2XII-2_peak725	197
											AP2XII-2_peak726	308
											AP2XII-2_peak727	87
											AP2XII-2_peak728	51
											AP2XII-2_peak729	310
											AP2XII-2_peak730	131
											AP2XII-2_peak731	87
											AP2XII-2_peak732	442
											AP2XII-2_peak733	467
											AP2XII-2_peak734	237
											AP2XII-2_peak735	286
											AP2XII-2_peak736	373
											AP2XII-2_peak737	240
											AP2XII-2_peak738	133
											AP2XII-2_peak739	179
											AP2XII-2_peak740	202
											AP2XII-2_peak741	180
											AP2XII-2_peak742	47
											AP2XII-2_peak743	279
											AP2XII-2_peak744	450
											AP2XII-2_peak745	202
											AP2XII-2_peak746	676
											AP2XII-2_peak747	210
											AP2XII-2_peak748	87
											AP2XII-2_peak749	150
											AP2XII-2_peak750	265
											AP2XII-2_peak751	289
											AP2XII-2_peak752	29
											AP2XII-2_peak753	248
											AP2XII-2_peak754	151
											AP2XII-2_peak755	199
											AP2XII-2_peak756	96
											AP2XII-2_peak757	53
											AP2XII-2_peak758	493
											AP2XII-2_peak759	97
											AP2XII-2_peak760	30
											AP2XII-2_peak761	413
											AP2XII-2_peak762	255
											AP2XII-2_peak763	154
											AP2XII-2_peak764	162
											AP2XII-2_peak765	70
											AP2XII-2_peak766	295
											AP2XII-2_peak767	286
											AP2XII-2_peak768	507
											AP2XII-2_peak769	376
											AP2XII-2_peak770	451
											AP2XII-2_peak771	265
											AP2XII-2_peak772	316
											AP2XII-2_peak773	258
											AP2XII-2_peak774	134
											AP2XII-2_peak775	927
											AP2XII-2_peak776	114
											AP2XII-2_peak777	328
											AP2XII-2_peak778	99
											AP2XII-2_peak779	49
											AP2XII-2_peak780	130
											AP2XII-2_peak781	83
											AP2XII-2_peak782	265
											AP2XII-2_peak783	52
											AP2XII-2_peak784	608
											AP2XII-2_peak785	265
											AP2XII-2_peak786	41
											AP2XII-2_peak787	261
											AP2XII-2_peak788	100
											AP2XII-2_peak789	175
											AP2XII-2_peak79	226
											AP2XII-2_peak790	106
											AP2XII-2_peak791	89
											AP2XII-2_peak792	159
											AP2XII-2_peak793	423
											AP2XII-2_peak794	93
											AP2XII-2_peak795	221
											AP2XII-2_peak796	66
											AP2XII-2_peak797	286
											AP2XII-2_peak798	266
											AP2XII-2_peak799	362
											AP2XII-2_peak800	189
											AP2XII-2_peak801	215
											AP2XII-2_peak802	306
											AP2XII-2_peak803	442
											AP2XII-2_peak804	332
											AP2XII-2_peak805	356
[truncated: 3,530 more rows]
