# Supplementary material for: AP2XII-1 and AP2XI-2 Suppress Schizogony Gene Expression in Toxoplasma gondii
Source: Int J Mol Sci. 2024 May 18;25(10):5527. doi: 10.3390/ijms25105527 (PMC11122372; doi:10.3390/ijms25105527)
Supplement: Supplementary file 1 [file ijms-25-05527-s001.zip › Table S2.xlsx]

## Sheet: Sheet1
Table S2: The annotated Cut-Tag and Chip-seq peaks of AP2XI-2. The peaks were annotated by ChIPseeker (Yu et al., 2015, Bioinformatics), and the overlapped peaks were identified by Irreproducibility Discovery Rate (IDR, Li et al., Annals of Applied Statistics). Cut-Tag (AP2XI-2-Jiang): Cut-tag data generated in this study; Cut-Tag (AP2XI-2-Antunes): Cut-Tag data from Antunes et al., 2023, Biorxiv.
Cut-Tag(AP2XI-2-Jiang)				Cut-Tag(AP2XI-2- Antunes）
ID	distance	peak(rep_1)	peak(rep_2)	ID	distance	peak
TGME49_243940	Promoter (<=1kb)	2520	2730	TGME49_286010	Promoter (<=1kb)	757
TGME49_310900	Promoter (<=1kb)	2218	2021	TGME49_310900	Promoter (<=1kb)	2465
TGME49_286010	Promoter (<=1kb)	788	857	TGME49_246020	Promoter (<=1kb)	1238
TGME49_273980	Promoter (<=1kb)	1020	1137	TGME49_309890	Promoter (<=1kb)	858
TGME49_224230	Promoter (<=1kb)	1762	1800	TGME49_224230	Promoter (<=1kb)	1003
TGME49_246020	Promoter (<=1kb)	736	1354	TGME49_228160	Promoter (<=1kb)	1158
TGME49_241710	Promoter (<=1kb)	1458	1142	TGME49_264260	Distal Intergenic	911
TGME49_205210	Promoter (<=1kb)	1944	1092	TGME49_221560	Promoter (<=1kb)	1206
TGME49_277240	Promoter (<=1kb)	389	389	TGME49_254890	Promoter (<=1kb)	1388
TGME49_293290	Promoter (<=1kb)	1676	1400	TGME49_243940	Promoter (<=1kb)	1379
TGME49_254890	Promoter (<=1kb)	825	1035	TGME49_274170	Promoter (<=1kb)	989
TGME49_201180	Promoter (<=1kb)	1356	985	TGME49_232400	Promoter (<=1kb)	1289
TGME49_249540	Promoter (1-2kb)	1225	1127	TGME49_277060	Promoter (<=1kb)	1944
TGME49_228160	Promoter (<=1kb)	1970	1975	TGME49_205210	Promoter (<=1kb)	808
TGME49_250770	Promoter (<=1kb)	1102	1639	TGME49_316580	Promoter (<=1kb)	1172
TGME49_277060	Promoter (<=1kb)	1685	1952	TGME49_267680	Promoter (<=1kb)	1592
TGME49_266368	Promoter (<=1kb)	1718	1626	TGME49_206650	Promoter (<=1kb)	2385
TGME49_253780	Promoter (<=1kb)	1808	1314	TGME49_228990	Promoter (<=1kb)	3365
TGME49_309890	Promoter (<=1kb)	716	870	TGME49_266368	Promoter (<=1kb)	1154
TGME49_205170	Promoter (<=1kb)	2229	2294	TGME49_257670	Promoter (<=1kb)	1083
TGME49_270670	Promoter (<=1kb)	917	1033	TGME49_257568	Promoter (<=1kb)	1834
TGME49_244510	Promoter (<=1kb)	1274	1180	TGME49_237550	Promoter (<=1kb)	1409
TGME49_264640	Promoter (<=1kb)	324	259	TGME49_294400	Promoter (<=1kb)	1209
TGME49_277260	Promoter (<=1kb)	2119	2211	TGME49_203705	Promoter (<=1kb)	2352
TGME49_280465	Promoter (<=1kb)	730	943	TGME49_253790	Promoter (<=1kb)	829
TGME49_264260	Distal Intergenic	239	329	TGME49_249600	Promoter (<=1kb)	1160
TGME49_319360	Promoter (<=1kb)	609	658	TGME49_243120	Promoter (<=1kb)	1260
TGME49_243930	Promoter (<=1kb)	1193	1518	TGME49_270680	Promoter (<=1kb)	789
TGME49_267670	Promoter (<=1kb)	990	1046	TGME49_275380	Promoter (<=1kb)	1324
TGME49_215895	Promoter (<=1kb)	2226	1830	TGME49_240330	Promoter (<=1kb)	1395
TGME49_281440	Distal Intergenic	1288	1288	TGME49_281430	Distal Intergenic	1425
TGME49_273650	Promoter (<=1kb)	1102	1031	TGME49_282200	Promoter (<=1kb)	1186
TGME49_203705	Promoter (<=1kb)	2182	2183	TGME49_306370	Promoter (<=1kb)	1061
TGME49_283870	Promoter (1-2kb)	527	700	TGME49_266600	Promoter (<=1kb)	564
TGME49_206650	Promoter (<=1kb)	1098	1350	TGME49_201180	Promoter (<=1kb)	1662
TGME49_214430	Promoter (<=1kb)	1363	1308	TGME49_229730	Promoter (<=1kb)	1198
TGME49_239270	Promoter (<=1kb)	1269	888	TGME49_273340	Promoter (<=1kb)	997
TGME49_267460	Promoter (<=1kb)	614	702	TGME49_256800	Promoter (<=1kb)	1001
TGME49_267680	Promoter (<=1kb)	1567	1717	TGME49_215895	Promoter (<=1kb)	1007
TGME49_240330	Promoter (<=1kb)	865	943	TGME49_239270	Promoter (<=1kb)	1580
TGME49_319560	Promoter (<=1kb)	1282	1868	TGME49_305110	Promoter (<=1kb)	1058
TGME49_257568	Promoter (<=1kb)	2021	2016	TGME49_216660	Promoter (<=1kb)	1248
TGME49_315610	Promoter (<=1kb)	991	1326	TGME49_248110	Promoter (<=1kb)	585
TGME49_243120	Promoter (<=1kb)	322	328	TGME49_238440	Promoter (<=1kb)	827
TGME49_311700	Promoter (<=1kb)	1332	1123	TGME49_311380	Promoter (<=1kb)	1350
TGME49_223830	Promoter (<=1kb)	1473	1034	TGME49_238460	Promoter (<=1kb)	1243
TGME49_320600	Promoter (<=1kb)	538	1364	TGME49_269320	Promoter (<=1kb)	685
TGME49_309990	Promoter (<=1kb)	1215	871	TGME49_251962	Promoter (<=1kb)	1060
TGME49_225110	Promoter (<=1kb)	881	953	TGME49_313660	Promoter (<=1kb)	953
TGME49_316510	Promoter (<=1kb)	1551	1972	TGME49_241710	Promoter (<=1kb)	1188
TGME49_248915	Promoter (<=1kb)	1089	1052	TGME49_275355	Promoter (<=1kb)	656
TGME49_320240	Promoter (<=1kb)	530	706	TGME49_207050	Promoter (<=1kb)	1151
TGME49_249600	Promoter (<=1kb)	707	814	TGME49_318675	Promoter (<=1kb)	936
TGME49_220400	Promoter (<=1kb)	1439	1945	TGME49_203800	Promoter (<=1kb)	1035
TGME49_293710	Promoter (<=1kb)	378	527	TGME49_276920	Promoter (<=1kb)	2106
TGME49_218955	Promoter (<=1kb)	1147	668	TGME49_209180	Promoter (<=1kb)	1892
TGME49_216200	Promoter (<=1kb)	955	1195	TGME49_318525	Promoter (<=1kb)	1013
TGME49_320090	Promoter (<=1kb)	671	561	TGME49_217370	Promoter (<=1kb)	686
TGME49_260600	Promoter (<=1kb)	1983	1981	TGME49_320090	Promoter (<=1kb)	690
TGME49_231910	3' UTR	771	250	TGME49_281660	Promoter (<=1kb)	852
TGME49_201160	Promoter (<=1kb)	892	1262	TGME49_231880	Promoter (<=1kb)	1115
TGME49_203810	Promoter (1-2kb)	1218	1145	TGME49_320600	Promoter (<=1kb)	1308
TGME49_220080	Promoter (<=1kb)	661	506	TGME49_268178	Promoter (<=1kb)	2289
TGME49_288360	Promoter (<=1kb)	1099	1288	TGME49_312690	Promoter (<=1kb)	906
TGME49_215890	3' UTR	1783	1222	TGME49_267460	Promoter (<=1kb)	1158
TGME49_243960	Promoter (<=1kb)	609	551	TGME49_297090	Promoter (<=1kb)	1892
TGME49_247220	Promoter (<=1kb)	781	775	TGME49_316510	Promoter (<=1kb)	940
TGME49_300190	Promoter (<=1kb)	600	687	TGME49_294550	Promoter (<=1kb)	705
TGME49_214420	Promoter (<=1kb)	526	505	TGME49_215890	3' UTR	1815
TGME49_225230	Promoter (1-2kb)	810	1122	TGME49_314250	Promoter (<=1kb)	411
TGME49_256800	Promoter (<=1kb)	813	1229	TGME49_240900	Promoter (<=1kb)	1751
TGME49_220240	Promoter (<=1kb)	766	1103	TGME49_309410	Promoter (<=1kb)	941
TGME49_234370	Promoter (<=1kb)	929	1412	TGME49_201820	Promoter (<=1kb)	958
TGME49_257670	Promoter (<=1kb)	1077	1680	TGME49_238050	Promoter (<=1kb)	1263
TGME49_247040	Promoter (<=1kb)	1050	1457	TGME49_214750	Promoter (<=1kb)	428
TGME49_252210	Promoter (<=1kb)	494	516	TGME49_285800	Promoter (<=1kb)	690
TGME49_318675	Promoter (<=1kb)	282	616	TGME49_267670	Promoter (<=1kb)	736
TGME49_318610	Promoter (<=1kb)	2019	2682	TGME49_310750	Promoter (1-2kb)	1066
TGME49_316580	Promoter (<=1kb)	868	1282	TGME49_280465	Promoter (<=1kb)	945
TGME49_321490	Promoter (<=1kb)	965	1139	TGME49_273980	Promoter (<=1kb)	1066
TGME49_269010	Promoter (<=1kb)	1309	886	TGME49_318610	Promoter (<=1kb)	1415
TGME49_282210	Promoter (<=1kb)	902	1197	TGME49_270700	Promoter (<=1kb)	926
TGME49_305110	Promoter (<=1kb)	936	953	TGME49_233180	Promoter (<=1kb)	1725
TGME49_262620	Promoter (<=1kb)	447	373	TGME49_263250	Promoter (<=1kb)	491
TGME49_319620	Promoter (<=1kb)	317	312	TGME49_309990	Promoter (<=1kb)	1185
TGME49_209180	Promoter (<=1kb)	1810	1622	TGME49_240880	Promoter (<=1kb)	1409
TGME49_249410	Promoter (<=1kb)	1097	712	TGME49_221630	Promoter (<=1kb)	816
TGME49_275380	Promoter (<=1kb)	990	928	TGME49_216190	Promoter (<=1kb)	671
TGME49_208730	Promoter (<=1kb)	1247	1106	TGME49_295400	Promoter (<=1kb)	926
TGME49_210408	Promoter (<=1kb)	865	1252	TGME49_204290	Promoter (<=1kb)	617
TGME49_314700	Promoter (<=1kb)	1390	1377	TGME49_241305	Promoter (<=1kb)	640
TGME49_226250	Promoter (<=1kb)	743	527	TGME49_223830	Promoter (<=1kb)	1570
TGME49_223080	Promoter (<=1kb)	369	678	TGME49_223080	Promoter (<=1kb)	904
TGME49_270700	Promoter (<=1kb)	674	954	TGME49_249410	Promoter (<=1kb)	680
TGME49_279100	Promoter (<=1kb)	1503	1817	TGME49_214430	Promoter (<=1kb)	1235
TGME49_229730	Promoter (<=1kb)	825	833	TGME49_319360	Promoter (<=1kb)	1850
TGME49_251962	Promoter (<=1kb)	535	605	TGME49_319620	Promoter (<=1kb)	1301
TGME49_319640	Promoter (<=1kb)	425	832	TGME49_264790	Promoter (<=1kb)	957
TGME49_251690	Promoter (<=1kb)	811	931	TGME49_247040	Promoter (<=1kb)	509
TGME49_263090	Promoter (<=1kb)	434	941	TGME49_239810	Promoter (1-2kb)	416
TGME49_255460	Promoter (<=1kb)	775	652	TGME49_255460	Promoter (<=1kb)	769
TGME49_225000	Promoter (<=1kb)	1552	1137	TGME49_306480	Promoter (<=1kb)	713
TGME49_300990	Promoter (<=1kb)	685	864	TGME49_272430	Promoter (<=1kb)	646
TGME49_269417	Promoter (<=1kb)	480	479	TGME49_306510	Promoter (<=1kb)	645
TGME49_257350	Promoter (<=1kb)	775	530	TGME49_311700	Promoter (<=1kb)	983
TGME49_289690	Promoter (<=1kb)	619	491	TGME49_263820	Promoter (<=1kb)	1514
TGME49_269310	Promoter (<=1kb)	616	486	TGME49_265020	3' UTR	665
TGME49_217370	Promoter (<=1kb)	530	637	TGME49_300130	Promoter (<=1kb)	1366
TGME49_203050	Promoter (<=1kb)	842	1626	TGME49_293258	Promoter (1-2kb)	668
TGME49_289530	Promoter (<=1kb)	690	842	TGME49_278757	Promoter (<=1kb)	1209
TGME49_239530	Promoter (<=1kb)	724	815	TGME49_209985	Promoter (<=1kb)	821
TGME49_231890	Promoter (<=1kb)	795	1326	TGME49_270650	Promoter (<=1kb)	780
TGME49_310170	Promoter (<=1kb)	414	920	TGME49_462910	Promoter (<=1kb)	409
TGME49_240880	Promoter (<=1kb)	676	765	TGME49_278300	Promoter (<=1kb)	679
TGME49_261300	Promoter (<=1kb)	818	467	TGME49_205170	Promoter (<=1kb)	1391
TGME49_218350	Promoter (<=1kb)	307	530	TGME49_306490	Distal Intergenic	767
TGME49_267370	Promoter (<=1kb)	1021	424	TGME49_310170	Promoter (<=1kb)	1588
TGME49_227430	Promoter (<=1kb)	523	805	TGME49_236040	Promoter (<=1kb)	1001
TGME49_221380	Promoter (<=1kb)	122	116	TGME49_215775	Promoter (<=1kb)	479
TGME49_222170	Promoter (<=1kb)	1705	816	TGME49_297920	Promoter (<=1kb)	349
TGME49_214140	5' UTR	1012	695	TGME49_224845	Promoter (<=1kb)	1267
TGME49_249890	Promoter (<=1kb)	542	538	TGME49_257925	Promoter (<=1kb)	1709
TGME49_221400	Promoter (<=1kb)	1401	3062	TGME49_307270	Distal Intergenic	658
TGME49_238490	Promoter (<=1kb)	1175	1011	TGME49_269300	Promoter (<=1kb)	1824
TGME49_222050	Promoter (<=1kb)	958	665	TGME49_228395	Promoter (<=1kb)	1549
TGME49_214070	Promoter (<=1kb)	581	795	TGME49_224880	Promoter (1-2kb)	442
TGME49_272710	Promoter (<=1kb)	1133	763	TGME49_305790	Promoter (<=1kb)	615
TGME49_316400	Promoter (<=1kb)	325	243	TGME49_321490	Promoter (<=1kb)	1692
TGME49_221630	Promoter (<=1kb)	1179	494	TGME49_238490	Promoter (<=1kb)	1253
TGME49_206330	Promoter (<=1kb)	369	251	TGME49_240930	Promoter (<=1kb)	547
TGME49_240900	Promoter (1-2kb)	1119	760	TGME49_309330	Promoter (<=1kb)	702
TGME49_270260	Promoter (<=1kb)	981	1483	TGME49_293390	Promoter (<=1kb)	1476
TGME49_202580	Promoter (<=1kb)	906	789	TGME49_316690	Promoter (<=1kb)	1006
TGME49_271190	Promoter (<=1kb)	252	438	TGME49_307045	Promoter (<=1kb)	439
TGME49_263820	Promoter (<=1kb)	537	734	TGME49_235630	Distal Intergenic	354
TGME49_275355	Promoter (<=1kb)	284	175	TGME49_273650	Promoter (<=1kb)	725
TGME49_309410	Promoter (<=1kb)	602	722	TGME49_249540	5' UTR	1926
TGME49_313250	Promoter (1-2kb)	479	498	TGME49_234370	Promoter (<=1kb)	780
TGME49_274170	Promoter (<=1kb)	383	620	TGME49_311360	Promoter (<=1kb)	835
TGME49_311380	Promoter (<=1kb)	429	464	TGME49_232270	Promoter (<=1kb)	844
TGME49_289370	Promoter (<=1kb)	385	197	TGME49_236670	Promoter (<=1kb)	1830
TGME49_282200	Promoter (<=1kb)	1516	1147	TGME49_250760	Promoter (<=1kb)	502
TGME49_241305	Promoter (<=1kb)	431	490	TGME49_219660	Promoter (<=1kb)	1991
TGME49_263260	Promoter (1-2kb)	759	813	TGME49_220400	Promoter (<=1kb)	1083
TGME49_294970	Promoter (<=1kb)	518	1245	TGME49_234460	Promoter (<=1kb)	1132
TGME49_203830	Promoter (<=1kb)	257	386	TGME49_293290	Promoter (<=1kb)	637
TGME49_306480	3' UTR	1076	2141	TGME49_232955	Promoter (<=1kb)	562
TGME49_235635	Promoter (<=1kb)	532	626	TGME49_291150	Promoter (<=1kb)	665
TGME49_202930	Promoter (<=1kb)	553	1007	TGME49_320250	Promoter (<=1kb)	570
TGME49_233460	Promoter (<=1kb)	690	1031	TGME49_293710	Promoter (<=1kb)	1276
TGME49_299020	Promoter (<=1kb)	484	533	TGME49_292110	Promoter (<=1kb)	971
TGME49_301480	Promoter (<=1kb)	380	598	TGME49_230170	Promoter (1-2kb)	830
TGME49_311720	Promoter (<=1kb)	838	481	TGME49_202580	Promoter (<=1kb)	1314
TGME49_220060	Distal Intergenic	113	135	TGME49_244510	Promoter (<=1kb)	983
TGME49_221560	Promoter (<=1kb)	352	548	TGME49_205370	Promoter (<=1kb)	682
TGME49_270640	Promoter (<=1kb)	692	615	TGME49_202930	Promoter (<=1kb)	1088
TGME49_266600	Promoter (<=1kb)	1112	1447	TGME49_268182	Promoter (<=1kb)	1186
TGME49_316690	Promoter (<=1kb)	1242	1709	TGME49_244450	Promoter (<=1kb)	1231
TGME49_201820	Promoter (<=1kb)	1071	1040	TGME49_295100	Promoter (<=1kb)	1646
TGME49_232000	Promoter (<=1kb)	1233	1146	TGME49_299020	Promoter (<=1kb)	1159
TGME49_238050	Promoter (<=1kb)	1105	1304	TGME49_278245	Promoter (<=1kb)	1409
TGME49_205320	Promoter (<=1kb)	998	1061	TGME49_249040	Promoter (<=1kb)	799
TGME49_314220	Promoter (<=1kb)	971	551	TGME49_240390	Promoter (1-2kb)	523
TGME49_318470	Promoter (<=1kb)	480	538	TGME49_295430	Promoter (<=1kb)	1616
TGME49_250820	Promoter (<=1kb)	786	284	TGME49_240880	3' UTR	2030
TGME49_232270	Promoter (<=1kb)	731	728	TGME49_278090	Promoter (<=1kb)	498
TGME49_269180	Promoter (1-2kb)	434	368	TGME49_355120	Promoter (<=1kb)	141
TGME49_201230	Promoter (<=1kb)	1107	773	TGME49_320240	Promoter (<=1kb)	794
TGME49_211730	Promoter (<=1kb)	317	356	TGME49_247540	Promoter (1-2kb)	294
TGME49_297880	Promoter (<=1kb)	862	791	TGME49_224290	Promoter (<=1kb)	969
TGME49_267150	Promoter (<=1kb)	426	462	TGME49_315610	Promoter (<=1kb)	1120
TGME49_257755	Promoter (<=1kb)	1706	430	TGME49_210408	Promoter (<=1kb)	1297
TGME49_218550	Promoter (<=1kb)	693	860	TGME49_309352	Promoter (<=1kb)	454
TGME49_291910	Promoter (<=1kb)	587	483	TGME49_277260	Promoter (<=1kb)	1136
TGME49_219660	Promoter (<=1kb)	857	1091	TGME49_226450	Promoter (<=1kb)	836
TGME49_261440	Promoter (<=1kb)	581	450	TGME49_306450	Promoter (<=1kb)	416
TGME49_258560	Promoter (<=1kb)	1024	571	TGME49_226250	Promoter (<=1kb)	320
TGME49_226960	Promoter (<=1kb)	486	508	TGME49_315770	Distal Intergenic	601
TGME49_238440	Promoter (<=1kb)	803	689	TGME49_257750	Promoter (<=1kb)	1969
TGME49_239010	Promoter (<=1kb)	950	675	TGME49_295662	Promoter (<=1kb)	662
TGME49_215775	Promoter (<=1kb)	461	653	TGME49_250770	Promoter (<=1kb)	745
TGME49_280460	Promoter (<=1kb)	1070	1023	TGME49_313780	Promoter (<=1kb)	543
TGME49_250500	Promoter (<=1kb)	414	305	TGME49_308010	Promoter (<=1kb)	526
TGME49_315770	Distal Intergenic	212	298	TGME49_260430	Promoter (<=1kb)	1759
TGME49_269820	Promoter (<=1kb)	533	389	TGME49_239530	Promoter (<=1kb)	270
TGME49_295430	Promoter (<=1kb)	581	920	TGME49_294410	Promoter (<=1kb)	1566
TGME49_222370	Promoter (<=1kb)	780	198	TGME49_300601	Promoter (<=1kb)	415
TGME49_209030	Promoter (<=1kb)	258	528	TGME49_301240	Promoter (1-2kb)	1140
TGME49_307045	Promoter (<=1kb)	753	556	TGME49_319520	Promoter (<=1kb)	465
TGME49_293690	Promoter (<=1kb)	1126	919	TGME49_320230	Promoter (<=1kb)	805
TGME49_226565	Promoter (<=1kb)	784	905	TGME49_202040	Promoter (<=1kb)	1249
TGME49_283770	Promoter (<=1kb)	1014	256	TGME49_225200	Promoter (<=1kb)	551
TGME49_288950	Promoter (<=1kb)	289	520	TGME49_294330	Promoter (<=1kb)	671
TGME49_306480	Promoter (<=1kb)	613	505	TGME49_222370	Promoter (<=1kb)	1047
TGME49_287040	Promoter (<=1kb)	249	779	TGME49_208020	Promoter (1-2kb)	453
TGME49_257090	Promoter (<=1kb)	1480	1454	TGME49_234900	Promoter (<=1kb)	1102
TGME49_227615	Promoter (<=1kb)	832	479	TGME49_218550	Promoter (<=1kb)	1071
TGME49_249040	Promoter (<=1kb)	293	1011	TGME49_210440	5' UTR	673
TGME49_202620	Promoter (<=1kb)	572	654	TGME49_320680	Promoter (<=1kb)	1799
TGME49_259030	Promoter (<=1kb)	1016	1001	TGME49_231160	Promoter (<=1kb)	1048
TGME49_238460	Promoter (<=1kb)	775	889	TGME49_269310	Promoter (<=1kb)	1468
TGME49_318525	Promoter (<=1kb)	243	340	TGME49_300990	Promoter (<=1kb)	508
TGME49_214310	Promoter (<=1kb)	908	354	TGME49_200310	Promoter (<=1kb)	642
TGME49_206590	Promoter (<=1kb)	428	309	TGME49_259030	Promoter (<=1kb)	1122
TGME49_262950	Promoter (<=1kb)	213	209	TGME49_314700	Promoter (<=1kb)	428
TGME49_310930	Promoter (<=1kb)	491	25	TGME49_297440	Promoter (<=1kb)	777
TGME49_201380	Promoter (<=1kb)	834	660	TGME49_261450	Promoter (<=1kb)	530
TGME49_311360	Promoter (<=1kb)	186	187	TGME49_217420	Promoter (<=1kb)	811
TGME49_279380	Promoter (<=1kb)	557	495	TGME49_213870	Promoter (<=1kb)	967
TGME49_211680	Promoter (<=1kb)	74	368	TGME49_223550	Promoter (<=1kb)	312
TGME49_281660	Promoter (<=1kb)	411	560	TGME49_310420	Promoter (<=1kb)	576
TGME49_294550	Promoter (<=1kb)	259	245	TGME49_232050	Promoter (<=1kb)	842
TGME49_224850	5' UTR	340	341	TGME49_285670	Promoter (<=1kb)	779
TGME49_213460	Distal Intergenic	599	1008	TGME49_222080	Promoter (<=1kb)	661
TGME49_306660	Promoter (1-2kb)	333	726	TGME49_311485	Promoter (<=1kb)	1143
TGME49_289920	Promoter (<=1kb)	886	1072	TGME49_293500	Promoter (<=1kb)	682
TGME49_290000	Promoter (<=1kb)	183	6	TGME49_300700	Promoter (<=1kb)	802
TGME49_225540	Promoter (<=1kb)	347	534	TGME49_222050	Promoter (<=1kb)	725
TGME49_239260	Promoter (<=1kb)	894	1090	TGME49_277240	Promoter (<=1kb)	157
TGME49_291150	Promoter (<=1kb)	459	628	TGME49_219750	Promoter (<=1kb)	785
TGME49_240880	Promoter (<=1kb)	420	596	TGME49_300608	Promoter (<=1kb)	3228
TGME49_238470	Promoter (<=1kb)	392	815	TGME49_214070	Promoter (<=1kb)	1046
TGME49_250800	Promoter (<=1kb)	399	643	TGME49_288360	Promoter (<=1kb)	652
TGME49_268178	Promoter (<=1kb)	398	693	TGME49_269010	Promoter (<=1kb)	1109
TGME49_214410	Promoter (1-2kb)	178	381	TGME49_247300	Promoter (<=1kb)	294
TGME49_224880	Promoter (1-2kb)	203	203	TGME49_224630	Promoter (<=1kb)	1251
TGME49_230480	Promoter (<=1kb)	756	815	TGME49_301996	Promoter (<=1kb)	5125
TGME49_258580	Promoter (<=1kb)	561	586	TGME49_309410	3' UTR	724
TGME49_295920	Promoter (<=1kb)	1008	738	TGME49_240960	Promoter (<=1kb)	592
TGME49_212200	Promoter (<=1kb)	378	233	TGME49_319640	Promoter (<=1kb)	806
TGME49_214840	Promoter (<=1kb)	1290	1397	TGME49_248915	Promoter (<=1kb)	1059
TGME49_215150	Promoter (<=1kb)	1022	1162	TGME49_310520	Promoter (<=1kb)	511
TGME49_253505	Promoter (<=1kb)	446	559	TGME49_300660	Promoter (<=1kb)	294
TGME49_270510	Promoter (<=1kb)	721	551	TGME49_261990	Promoter (<=1kb)	1073
TGME49_293390	Promoter (<=1kb)	362	387	TGME49_268800	Promoter (<=1kb)	204
TGME49_230940	Promoter (<=1kb)	225	300	TGME49_268850	Promoter (<=1kb)	496
TGME49_260540	Promoter (<=1kb)	414	347	TGME49_214140	5' UTR	475
TGME49_246140	Promoter (<=1kb)	653	696	TGME49_278870	Promoter (<=1kb)	819
TGME49_224290	Promoter (<=1kb)	422	774	TGME49_238470	Promoter (<=1kb)	357
TGME49_202040	Promoter (<=1kb)	1066	238	TGME49_308090	Promoter (<=1kb)	223
TGME49_320250	Promoter (<=1kb)	1044	653	TGME49_267980	Promoter (<=1kb)	642
TGME49_239430	Promoter (<=1kb)	973	820	TGME49_233610	Promoter (<=1kb)	583
TGME49_221620	Promoter (<=1kb)	231	365	TGME49_311375	Promoter (<=1kb)	1063
TGME49_309330	Promoter (<=1kb)	620	1396	TGME49_247470	Promoter (<=1kb)	254
TGME49_243465	Promoter (1-2kb)	889	959	TGME49_275790	Promoter (<=1kb)	288
TGME49_201400	Promoter (1-2kb)	178	357	TGME49_320260	Promoter (<=1kb)	571
TGME49_313010	Promoter (<=1kb)	894	1087	TGME49_207965	Promoter (<=1kb)	428
TGME49_257530	Promoter (<=1kb)	950	797	TGME49_300680	Promoter (<=1kb)	2263
TGME49_285800	Promoter (<=1kb)	1073	1005	TGME49_203830	Promoter (<=1kb)	746
TGME49_249180	3' UTR	339	407	TGME49_227090	Promoter (<=1kb)	621
TGME49_285250	Promoter (1-2kb)	421	716	TGME49_275850	Promoter (<=1kb)	355
TGME49_239810	Promoter (<=1kb)	716	821	TGME49_243378	Promoter (<=1kb)	509
TGME49_216660	Promoter (<=1kb)	2040	440	TGME49_206590	Promoter (<=1kb)	1186
TGME49_277510	Promoter (<=1kb)	402	373	TGME49_243930	Promoter (<=1kb)	907
TGME49_306480	Promoter (1-2kb)	159	188	TGME49_264150	Promoter (<=1kb)	3558
TGME49_234900	Promoter (<=1kb)	1280	1821	TGME49_264940	Promoter (<=1kb)	345
TGME49_297090	Promoter (<=1kb)	1080	852	TGME49_311890	Promoter (<=1kb)	1302
TGME49_245485	Promoter (<=1kb)	954	960	TGME49_208820	Promoter (<=1kb)	821
TGME49_239090	Promoter (<=1kb)	339	184	TGME49_216080	Promoter (<=1kb)	944
TGME49_278380	Promoter (<=1kb)	161	141	TGME49_217410	Promoter (<=1kb)	530
TGME49_278400	Promoter (<=1kb)	178	187	TGME49_276880	Promoter (<=1kb)	1225
TGME49_294800	Promoter (<=1kb)	923	910	TGME49_225105	Promoter (<=1kb)	432
TGME49_306620	Promoter (<=1kb)	373	899	TGME49_279380	Promoter (<=1kb)	1551
TGME49_231630	Promoter (<=1kb)	533	592	TGME49_221340	5' UTR	432
TGME49_215480	Promoter (<=1kb)	418	956	TGME49_232000	Promoter (<=1kb)	1300
TGME49_295662	Promoter (<=1kb)	597	599	TGME49_217700	Promoter (<=1kb)	1318
TGME49_245460	Promoter (<=1kb)	370	632	TGME49_300650	Promoter (<=1kb)	290
TGME49_320180	Promoter (<=1kb)	280	330	TGME49_214420	Promoter (<=1kb)	389
TGME49_294400	Promoter (<=1kb)	433	429	TGME49_254960	Promoter (<=1kb)	409
TGME49_212900	Promoter (<=1kb)	387	386	TGME49_294820	Promoter (1-2kb)	616
TGME49_304880	Promoter (<=1kb)	360	250	TGME49_267370	Promoter (<=1kb)	793
TGME49_246490	3' UTR	1178	194	TGME49_306620	Promoter (<=1kb)	2091
TGME49_305170	Promoter (<=1kb)	315	528	TGME49_282210	Promoter (<=1kb)	1397
TGME49_318400	Promoter (<=1kb)	781	785	TGME49_297710	Promoter (<=1kb)	947
TGME49_211710	Promoter (<=1kb)	422	397	TGME49_203350	Promoter (<=1kb)	1039
TGME49_267585	Promoter (<=1kb)	331	322	TGME49_246210	Promoter (<=1kb)	1404
TGME49_227090	Promoter (<=1kb)	598	230	TGME49_231400	Promoter (<=1kb)	320
TGME49_278870	Promoter (<=1kb)	586	644	TGME49_297330	Promoter (1-2kb)	1668
TGME49_260430	Promoter (<=1kb)	1111	930	TGME49_315390	Promoter (<=1kb)	398
TGME49_294980	Promoter (<=1kb)	975	330	TGME49_207370	Promoter (<=1kb)	1415
TGME49_320480	Promoter (<=1kb)	1049	767	TGME49_201150	Promoter (<=1kb)	1407
TGME49_238490	Promoter (<=1kb)	222	155	TGME49_227430	Promoter (<=1kb)	1492
TGME49_236970	Promoter (1-2kb)	733	637	TGME49_313422	Promoter (<=1kb)	651
TGME49_225210	Promoter (<=1kb)	106	59	TGME49_215910	Promoter (<=1kb)	657
TGME49_313660	Promoter (<=1kb)	343	212	TGME49_238140	Promoter (<=1kb)	890
TGME49_264660	Promoter (<=1kb)	273	691	TGME49_247220	Promoter (<=1kb)	693
TGME49_278245	Promoter (<=1kb)	673	420	TGME49_244726	Promoter (<=1kb)	707
TGME49_253820	Promoter (<=1kb)	291	158	TGME49_262950	Promoter (<=1kb)	240
TGME49_300140	Promoter (<=1kb)	1564	1722	TGME49_230480	Promoter (<=1kb)	609
TGME49_286590	Promoter (<=1kb)	313	1603	TGME49_311390	Promoter (<=1kb)	485
TGME49_268800	Promoter (<=1kb)	312	211	TGME49_318220	Promoter (<=1kb)	1906
TGME49_311375	Promoter (<=1kb)	744	237	TGME49_204270	Promoter (<=1kb)	893
TGME49_239770	Promoter (<=1kb)	247	547	TGME49_206290	Promoter (<=1kb)	624
TGME49_269620	Distal Intergenic	404	724	TGME49_276940	Promoter (<=1kb)	717
TGME49_277730	Promoter (<=1kb)	561	621	TGME49_318470	Promoter (<=1kb)	763
TGME49_217530	Promoter (<=1kb)	158	201	TGME49_267150	Promoter (<=1kb)	622
TGME49_204300	Promoter (<=1kb)	528	99	TGME49_316130	Promoter (<=1kb)	630
TGME49_225870	Promoter (<=1kb)	192	169	TGME49_301480	Promoter (<=1kb)	318
TGME49_247300	Promoter (<=1kb)	517	447	TGME49_289920	Promoter (<=1kb)	286
TGME49_276940	Promoter (<=1kb)	279	359	TGME49_291910	Promoter (<=1kb)	694
TGME49_271970	Promoter (<=1kb)	526	616	TGME49_312490	Promoter (<=1kb)	460
TGME49_223550	Promoter (<=1kb)	163	637	TGME49_305120	Promoter (<=1kb)	1370
TGME49_207820	Promoter (1-2kb)	229	220	TGME49_219120	Promoter (<=1kb)	368
TGME49_214440	Promoter (<=1kb)	1689	717	TGME49_289700	Promoter (<=1kb)	370
TGME49_253880	Promoter (<=1kb)	418	412	TGME49_261440	Promoter (<=1kb)	1043
TGME49_261710	Promoter (<=1kb)	859	1294	TGME49_243190	Promoter (<=1kb)	1187
TGME49_309352	Promoter (<=1kb)	1466	313	TGME49_320180	Promoter (<=1kb)	617
TGME49_320230	Promoter (<=1kb)	204	733	TGME49_217890	Promoter (<=1kb)	1238
TGME49_294330	Promoter (<=1kb)	245	292	TGME49_287040	Promoter (<=1kb)	824
TGME49_284180	Promoter (1-2kb)	701	393	TGME49_275370	Promoter (<=1kb)	649
TGME49_273340	Promoter (<=1kb)	535	143	TGME49_207005	Promoter (<=1kb)	584
TGME49_251810	Promoter (<=1kb)	328	194	TGME49_253370	Promoter (<=1kb)	832
TGME49_233380	Promoter (<=1kb)	729	338	TGME49_224050	Promoter (<=1kb)	1510
TGME49_209500	Promoter (<=1kb)	468	489	TGME49_254910	Promoter (<=1kb)	1023
TGME49_200385	Distal Intergenic	622	222	TGME49_301150	Promoter (<=1kb)	570
TGME49_231800	Promoter (1-2kb)	348	291	TGME49_241140	Promoter (<=1kb)	841
TGME49_250760	Promoter (<=1kb)	1308	1219	TGME49_249030	Promoter (<=1kb)	339
TGME49_232940	Promoter (<=1kb)	19	363	TGME49_319560	Promoter (<=1kb)	255
TGME49_230205	Promoter (<=1kb)	945	857	TGME49_292020	Promoter (<=1kb)	610
TGME49_232050	Promoter (<=1kb)	478	924	TGME49_213460	Distal Intergenic	410
TGME49_224845	Promoter (<=1kb)	778	549	TGME49_221410	Promoter (1-2kb)	1254
TGME49_308090	Promoter (<=1kb)	189	265	TGME49_264660	Promoter (<=1kb)	509
TGME49_275680	Promoter (<=1kb)	216	399	TGME49_233500	Promoter (<=1kb)	1481
TGME49_269690	Promoter (<=1kb)	523	299	TGME49_232130	Promoter (<=1kb)	383
TGME49_218362	Promoter (<=1kb)	809	801	TGME49_216880	Promoter (<=1kb)	729
TGME49_314450	Promoter (<=1kb)	159	498	TGME49_234300	Promoter (<=1kb)	457
TGME49_305340	Promoter (<=1kb)	203	269	TGME49_268880	Promoter (<=1kb)	992
TGME49_294670	Promoter (<=1kb)	225	386	TGME49_314570	Promoter (<=1kb)	249
TGME49_257685	Promoter (<=1kb)	7	195	TGME49_246070	Promoter (<=1kb)	238
TGME49_253880	Promoter (<=1kb)	184	380	TGME49_231180	Promoter (<=1kb)	617
TGME49_305990	Promoter (<=1kb)	418	249	TGME49_217855	Promoter (<=1kb)	1634
TGME49_301150	Promoter (<=1kb)	373	544	TGME49_231370	Promoter (<=1kb)	1021
TGME49_242090	Promoter (<=1kb)	1034	376	TGME49_210270	Promoter (<=1kb)	611
TGME49_205370	Promoter (<=1kb)	1025	222	TGME49_250500	Promoter (<=1kb)	387
TGME49_294830	Promoter (<=1kb)	339	747	TGME49_238980	Promoter (<=1kb)	819
TGME49_210270	Promoter (<=1kb)	296	216	TGME49_223258	Promoter (<=1kb)	915
TGME49_264790	Promoter (<=1kb)	957	340	TGME49_207100	Promoter (<=1kb)	502
TGME49_217700	Promoter (<=1kb)	991	874	TGME49_252210	Promoter (<=1kb)	872
TGME49_233460	Promoter (<=1kb)	142	267	TGME49_222390	Promoter (<=1kb)	247
TGME49_267585	Promoter (<=1kb)	622	274	TGME49_203050	Promoter (<=1kb)	1087
TGME49_247460	Promoter (<=1kb)	567	744	TGME49_260540	Promoter (<=1kb)	260
TGME49_226450	Promoter (<=1kb)	952	601	TGME49_245485	Promoter (<=1kb)	1486
TGME49_305505	Promoter (<=1kb)	513	209	TGME49_259835	Promoter (<=1kb)	272
TGME49_204270	Promoter (<=1kb)	336	489	TGME49_244440	Promoter (<=1kb)	436
TGME49_209240	Promoter (<=1kb)	232	646	TGME49_242570	Promoter (<=1kb)	857
TGME49_232950	Promoter (<=1kb)	605	2290	TGME49_252860	Promoter (<=1kb)	722
TGME49_237880	Promoter (<=1kb)	1257	713	TGME49_314220	Promoter (<=1kb)	588
TGME49_212780	Promoter (<=1kb)	234	361	TGME49_251660	Promoter (<=1kb)	658
TGME49_305120	Promoter (<=1kb)	653	337	TGME49_215480	Promoter (<=1kb)	467
TGME49_296000	5' UTR	161	45	TGME49_315380	Promoter (<=1kb)	444
TGME49_295300	Promoter (<=1kb)	246	122	TGME49_220240	Promoter (<=1kb)	456
TGME49_305790	Promoter (<=1kb)	632	166	TGME49_261710	Promoter (<=1kb)	1685
TGME49_270880	Distal Intergenic	445	139	TGME49_258840	Promoter (<=1kb)	681
TGME49_269417	Promoter (1-2kb)	823	152	TGME49_320490	Promoter (<=1kb)	1319
TGME49_268380	Promoter (1-2kb)	390	594	TGME49_239620	Promoter (<=1kb)	614
TGME49_238140	Promoter (<=1kb)	195	484	TGME49_316420	Promoter (<=1kb)	1014
TGME49_231160	Promoter (<=1kb)	277	65	TGME49_238210	Promoter (<=1kb)	411
TGME49_244560	Promoter (<=1kb)	183	268	TGME49_217951	Distal Intergenic	680
TGME49_275790	Promoter (<=1kb)	384	596	TGME49_295600	Promoter (<=1kb)	459
TGME49_258840	Promoter (<=1kb)	248	152	TGME49_294240	Promoter (<=1kb)	623
TGME49_245560	Promoter (<=1kb)	872	142	TGME49_253880	Promoter (<=1kb)	360
TGME49_220270	Promoter (<=1kb)	484	66	TGME49_271888	Promoter (<=1kb)	509
TGME49_259950	Promoter (<=1kb)	606	689	TGME49_235635	Promoter (<=1kb)	393
TGME49_208020	Promoter (1-2kb)	94	229	TGME49_214310	Promoter (<=1kb)	564
TGME49_270890	Promoter (<=1kb)	903	668	TGME49_238220	Promoter (<=1kb)	385
TGME49_261230	Distal Intergenic	652	273	TGME49_239020	Promoter (<=1kb)	230
TGME49_298080	Promoter (<=1kb)	449	171	TGME49_200110	Distal Intergenic	877
TGME49_281910	Promoter (<=1kb)	77	118	TGME49_261300	Promoter (<=1kb)	948
TGME49_288620	Promoter (<=1kb)	832	770	TGME49_209050	Promoter (<=1kb)	512
TGME49_234300	Promoter (<=1kb)	406	590	TGME49_225230	Promoter (1-2kb)	751
TGME49_253380	Promoter (<=1kb)	391	899	TGME49_247360	Promoter (<=1kb)	1085
TGME49_206440	Promoter (<=1kb)	400	462	TGME49_318390	Promoter (<=1kb)	865
TGME49_245480	Promoter (1-2kb)	533	617	TGME49_265520	Promoter (<=1kb)	588
TGME49_314430	Promoter (1-2kb)	181	459	TGME49_315950	Promoter (1-2kb)	460
TGME49_208820	Promoter (<=1kb)	460	398	TGME49_276980	Promoter (<=1kb)	413
TGME49_247530	Promoter (<=1kb)	134	136	TGME49_237880	Promoter (<=1kb)	590
TGME49_265090	Promoter (<=1kb)	459	169	TGME49_293480	Promoter (<=1kb)	320
TGME49_306510	Promoter (<=1kb)	581	366	TGME49_267585	Promoter (<=1kb)	624
TGME49_308020	Promoter (<=1kb)	304	774	TGME49_211720	Promoter (<=1kb)	1614
TGME49_305160	Promoter (<=1kb)	169	11	TGME49_286000	Promoter (<=1kb)	309
TGME49_310880	Promoter (<=1kb)	280	955	TGME49_304870	Promoter (<=1kb)	217
TGME49_243950	Distal Intergenic	540	325	TGME49_306330	Promoter (<=1kb)	1262
TGME49_248110	Promoter (<=1kb)	433	518	TGME49_212860	Promoter (<=1kb)	1121
TGME49_293260	Promoter (<=1kb)	259	521	TGME49_255700	Promoter (1-2kb)	847
TGME49_222080	Promoter (<=1kb)	352	602	TGME49_309300	Promoter (<=1kb)	776
TGME49_248270	Promoter (1-2kb)	191	352	TGME49_219300	Promoter (<=1kb)	1026
TGME49_297340	Promoter (<=1kb)	132	137	TGME49_310930	Promoter (<=1kb)	323
TGME49_216880	Promoter (<=1kb)	331	300	TGME49_219742	Promoter (<=1kb)	1040
TGME49_206540	Promoter (<=1kb)	448	223	TGME49_308020	Promoter (<=1kb)	787
TGME49_287480	Promoter (1-2kb)	173	517	TGME49_203770	Promoter (<=1kb)	569
TGME49_254880	Promoter (<=1kb)	203	223	TGME49_239430	5' UTR	1265
TGME49_280490	Promoter (1-2kb)	542	177	TGME49_204400	Promoter (<=1kb)	270
TGME49_294820	Promoter (1-2kb)	175	277	TGME49_312310	Promoter (<=1kb)	498
TGME49_316410	Promoter (1-2kb)	173	167	TGME49_250810	Promoter (<=1kb)	324
TGME49_320260	Promoter (<=1kb)	702	690	TGME49_270920	Promoter (<=1kb)	584
TGME49_311890	Promoter (<=1kb)	48	273	TGME49_238030	Promoter (<=1kb)	683
TGME49_293258	Promoter (1-2kb)	1446	1330	TGME49_231630	Promoter (<=1kb)	487
TGME49_273760	Promoter (<=1kb)	751	454	TGME49_231800	Promoter (<=1kb)	273
TGME49_228395	Promoter (1-2kb)	1142	242	TGME49_225110	Promoter (<=1kb)	249
TGME49_236040	Promoter (<=1kb)	601	330	TGME49_289370	Promoter (<=1kb)	1095
TGME49_230170	Promoter (<=1kb)	1090	1607	TGME49_260600	Promoter (<=1kb)	451
TGME49_261240	Promoter (<=1kb)	1564	470	TGME49_221250	Promoter (<=1kb)	481
TGME49_238480	Promoter (<=1kb)	61	210	TGME49_238995	Promoter (1-2kb)	645
TGME49_208722	Distal Intergenic	262	176	TGME49_306500	Promoter (<=1kb)	344
TGME49_321520	Promoter (<=1kb)	86	342	TGME49_264640	Promoter (<=1kb)	296
TGME49_206680	Promoter (<=1kb)	229	177	TGME49_259950	Promoter (<=1kb)	407
TGME49_320210	Promoter (<=1kb)	505	149	TGME49_221270	Promoter (<=1kb)	1216
TGME49_321680	Promoter (<=1kb)	518	489	TGME49_242270	Promoter (<=1kb)	540
TGME49_214430	Promoter (<=1kb)	82	87	TGME49_262620	Promoter (<=1kb)	233
TGME49_272430	Promoter (<=1kb)	254	420	TGME49_225000	Promoter (1-2kb)	1227
TGME49_218220	Promoter (<=1kb)	454	360	TGME49_209500	Promoter (<=1kb)	591
TGME49_309040	Promoter (<=1kb)	381	493	TGME49_257530	Promoter (<=1kb)	1390
TGME49_280380	Promoter (<=1kb)	268	260	TGME49_241880	Promoter (<=1kb)	408
TGME49_244440	Promoter (<=1kb)	293	295	TGME49_250360	Promoter (<=1kb)	692
TGME49_267980	Promoter (<=1kb)	339	640	TGME49_290000	Promoter (<=1kb)	371
TGME49_281970	Promoter (<=1kb)	141	356	TGME49_245680	Promoter (<=1kb)	464
TGME49_205470	Promoter (<=1kb)	119	448	TGME49_206430	Promoter (<=1kb)	389
TGME49_212190	Promoter (1-2kb)	183	177	TGME49_247790	Promoter (<=1kb)	250
TGME49_315380	Promoter (<=1kb)	860	414	TGME49_288800	Promoter (1-2kb)	536
TGME49_266080	Promoter (<=1kb)	136	122	TGME49_222300	Promoter (<=1kb)	765
TGME49_202770	Promoter (<=1kb)	124	244	TGME49_261400	Promoter (<=1kb)	517
TGME49_243950	3' UTR	289	312	TGME49_294690	Promoter (<=1kb)	303
TGME49_223258	Promoter (<=1kb)	559	564	TGME49_280460	Promoter (<=1kb)	847
TGME49_207370	Promoter (<=1kb)	272	248	TGME49_271190	Promoter (<=1kb)	1102
TGME49_231850	Promoter (<=1kb)	252	359	TGME49_223845	Promoter (<=1kb)	602
TGME49_210440	5' UTR	230	1	TGME49_277730	Promoter (<=1kb)	691
TGME49_307575	Promoter (<=1kb)	309	355	TGME49_301180	Promoter (<=1kb)	725
TGME49_216810	Promoter (1-2kb)	214	221	TGME49_258560	Promoter (<=1kb)	1051
TGME49_276810	Distal Intergenic	249	319	TGME49_240325	Promoter (<=1kb)	299
TGME49_225080	Promoter (<=1kb)	146	218	TGME49_228050	Promoter (<=1kb)	601
TGME49_312630	Promoter (<=1kb)	179	158	TGME49_310640	Promoter (<=1kb)	402
TGME49_281530	3' UTR	123	374	TGME49_316310	Promoter (<=1kb)	1732
TGME49_233180	Promoter (<=1kb)	149	1047	TGME49_254940	Promoter (<=1kb)	1302
TGME49_212770	Promoter (<=1kb)	433	1228	TGME49_266690	Promoter (<=1kb)	761
TGME49_261740	Promoter (<=1kb)	290	48	TGME49_239090	Promoter (<=1kb)	756
TGME49_316130	Promoter (<=1kb)	177	482	TGME49_300120	Promoter (<=1kb)	701
TGME49_278380	Promoter (<=1kb)	185	310	TGME49_260310	Promoter (<=1kb)	408
TGME49_310670	Promoter (<=1kb)	350	715	TGME49_209960	Promoter (<=1kb)	455
TGME49_249900	Promoter (<=1kb)	160	184	TGME49_268980	Promoter (<=1kb)	854
TGME49_221210	Promoter (<=1kb)	50	233	TGME49_228200	Promoter (<=1kb)	2067
TGME49_320080	Promoter (<=1kb)	235	475	TGME49_237450	Promoter (<=1kb)	400
TGME49_220330	Promoter (<=1kb)	455	188	TGME49_251690	Promoter (<=1kb)	967
TGME49_236550	Promoter (<=1kb)	21	16	TGME49_278380	Promoter (<=1kb)	259
TGME49_319550	Promoter (1-2kb)	92	262	TGME49_234450	Promoter (<=1kb)	453
TGME49_301400	Promoter (1-2kb)	483	333	TGME49_283790	Promoter (<=1kb)	1030
TGME49_221340	5' UTR	638	218	TGME49_222690	Promoter (<=1kb)	236
TGME49_205340	Promoter (1-2kb)	53	189	TGME49_214440	Promoter (<=1kb)	367
TGME49_264080	Promoter (<=1kb)	298	198	TGME49_218358	Promoter (<=1kb)	2559
TGME49_318340	Promoter (<=1kb)	346	1422	TGME49_259040	Promoter (<=1kb)	597
TGME49_221190	Promoter (<=1kb)	820	438	TGME49_267160	Promoter (<=1kb)	786
TGME49_203300	Promoter (<=1kb)	347	376	TGME49_270890	Promoter (<=1kb)	377
TGME49_271050	Promoter (<=1kb)	183	761	TGME49_249890	Promoter (<=1kb)	873
TGME49_245980	Promoter (<=1kb)	40	77	TGME49_263220	Promoter (<=1kb)	691
TGME49_279315	Promoter (<=1kb)	752	315	TGME49_232035	Promoter (<=1kb)	1021
TGME49_295400	Promoter (<=1kb)	570	31	TGME49_291320	Promoter (1-2kb)	206
TGME49_251660	Promoter (<=1kb)	183	206	TGME49_321270	Distal Intergenic	367
TGME49_253750	Promoter (<=1kb)	524	203	TGME49_208420	Distal Intergenic	320
TGME49_294240	Promoter (<=1kb)	161	78	TGME49_244530	Promoter (<=1kb)	1073
TGME49_309300	Promoter (<=1kb)	93	61	TGME49_308060	Promoter (<=1kb)	516
TGME49_267480	Promoter (<=1kb)	529	622	TGME49_296640	Promoter (<=1kb)	272
TGME49_280522	Promoter (1-2kb)	85	235	TGME49_257300	Promoter (<=1kb)	198
TGME49_224460	Promoter (<=1kb)	354	194	TGME49_269417	Promoter (<=1kb)	490
TGME49_230940	Promoter (<=1kb)	258	180	TGME49_224850	5' UTR	786
TGME49_201390	Promoter (1-2kb)	8	4	TGME49_245480	Promoter (1-2kb)	387
TGME49_313910	Promoter (<=1kb)	58	306	TGME49_278330	Promoter (<=1kb)	388
TGME49_234450	Promoter (<=1kb)	211	51	TGME49_218955	Promoter (<=1kb)	356
TGME49_316710	Promoter (<=1kb)	34	178	TGME49_230140	Promoter (<=1kb)	491
TGME49_201250	Promoter (<=1kb)	423	1371	TGME49_236970	Promoter (<=1kb)	990
TGME49_201380	3' UTR	126	303	TGME49_249850	Promoter (<=1kb)	758
TGME49_278300	Promoter (<=1kb)	386	389	TGME49_202450	Promoter (<=1kb)	261
TGME49_213030	Promoter (<=1kb)	183	65	TGME49_316690	3' UTR	645
TGME49_231180	Promoter (<=1kb)	203	239	TGME49_243180	Promoter (<=1kb)	241
TGME49_264150	Promoter (<=1kb)	386	240	TGME49_203682	Promoter (<=1kb)	532
TGME49_284310	Distal Intergenic	141	339	TGME49_201120	Promoter (<=1kb)	387
TGME49_264160	Promoter (<=1kb)	717	381	TGME49_309040	Promoter (<=1kb)	379
TGME49_232410	Promoter (<=1kb)	367	812	TGME49_294830	Promoter (<=1kb)	455
TGME49_253460	Promoter (<=1kb)	600	399	TGME49_262400	Promoter (<=1kb)	693
TGME49_284670	Promoter (<=1kb)	100	361	TGME49_294800	Promoter (<=1kb)	457
TGME49_258470	Promoter (<=1kb)	2	226	TGME49_260380	Promoter (<=1kb)	281
TGME49_214370	Promoter (<=1kb)	104	255	TGME49_215580	Promoter (<=1kb)	459
TGME49_240900	Promoter (<=1kb)	339	138	TGME49_270910	Promoter (<=1kb)	921
TGME49_294410	Promoter (<=1kb)	485	1159	TGME49_258580	Promoter (<=1kb)	316
TGME49_276820	Promoter (<=1kb)	138	121	TGME49_224800	Promoter (<=1kb)	791
TGME49_288370	Promoter (<=1kb)	82	353	TGME49_278320	Promoter (<=1kb)	235
TGME49_297720	3' UTR	326	332	TGME49_311720	Promoter (<=1kb)	1097
TGME49_236850	Promoter (<=1kb)	438	305	TGME49_253820	Promoter (<=1kb)	1091
TGME49_257925	Promoter (<=1kb)	390	823	TGME49_232370	Promoter (1-2kb)	692
TGME49_243190	Promoter (<=1kb)	378	558	TGME49_269820	Promoter (<=1kb)	713
TGME49_309210	3' UTR	101	148	TGME49_234550	Promoter (<=1kb)	945
TGME49_317830	Distal Intergenic	128	35	TGME49_229640	Promoter (<=1kb)	568
TGME49_246330	Promoter (<=1kb)	181	227	TGME49_246130	Promoter (<=1kb)	290
TGME49_219800	Promoter (<=1kb)	425	1	TGME49_220270	Promoter (<=1kb)	920
TGME49_224630	Promoter (<=1kb)	167	272	TGME49_212770	Promoter (<=1kb)	982
TGME49_310900	Promoter (1-2kb)	317	97	TGME49_217400	Promoter (<=1kb)	797
TGME49_212310	Promoter (<=1kb)	87	178	TGME49_270940	3' UTR	263
TGME49_286090	Promoter (<=1kb)	311	267	TGME49_258470	Promoter (<=1kb)	1585
TGME49_252620	Promoter (<=1kb)	66	94	TGME49_281900	Promoter (<=1kb)	447
TGME49_253440	Promoter (1-2kb)	655	316	TGME49_215150	Promoter (<=1kb)	396
TGME49_228990	Promoter (<=1kb)	799	1482	TGME49_245432	Promoter (<=1kb)	370
TGME49_204400	Promoter (<=1kb)	196	263	TGME49_297060	Promoter (<=1kb)	729
TGME49_318600	Promoter (1-2kb)	221	926	TGME49_255175	Promoter (1-2kb)	448
TGME49_276230	Distal Intergenic	840	795	TGME49_204000	Promoter (<=1kb)	663
TGME49_253755	Promoter (<=1kb)	65	224	TGME49_289530	Promoter (<=1kb)	237
TGME49_232370	Promoter (1-2kb)	622	600	TGME49_232280	Promoter (<=1kb)	702
TGME49_298820	Distal Intergenic	201	157	TGME49_219520	Promoter (<=1kb)	461
TGME49_313273	Promoter (1-2kb)	210	90	TGME49_275470	3' UTR	170
TGME49_308010	Promoter (<=1kb)	195	451	TGME49_230350	Promoter (1-2kb)	207
TGME49_262400	Promoter (<=1kb)	760	687	TGME49_205290	Promoter (1-2kb)	445
TGME49_319630	Promoter (1-2kb)	194	153	TGME49_226220	Promoter (<=1kb)	379
TGME49_220380	Promoter (<=1kb)	34	206	TGME49_236850	Promoter (<=1kb)	304
TGME49_286000	Promoter (<=1kb)	356	223	TGME49_265250	Distal Intergenic	697
TGME49_293500	Promoter (1-2kb)	474	93	TGME49_306410	Promoter (<=1kb)	729
TGME49_268800	Distal Intergenic	291	468	TGME49_254050	Promoter (<=1kb)	355
TGME49_321490	3' UTR	214	126	TGME49_257770	Promoter (<=1kb)	515
TGME49_270760	Promoter (1-2kb)	189	162	TGME49_263090	Promoter (<=1kb)	129
TGME49_290682	Promoter (<=1kb)	620	61	TGME49_225930	Promoter (<=1kb)	230
TGME49_221275	Promoter (<=1kb)	202	4	TGME49_313670	Promoter (<=1kb)	1200
TGME49_295340	Promoter (<=1kb)	531	186	TGME49_250880	Promoter (<=1kb)	826
TGME49_277070	Promoter (<=1kb)	413	223	TGME49_293700	Promoter (<=1kb)	425
TGME49_222220	Promoter (<=1kb)	710	160	TGME49_222230	Promoter (1-2kb)	710
TGME49_270240	Promoter (<=1kb)	231	239	TGME49_311650	Promoter (<=1kb)	753
TGME49_319370	Promoter (<=1kb)	360	582	TGME49_278940	Promoter (<=1kb)	462
TGME49_203985	Promoter (1-2kb)	186	254	TGME49_315400	Promoter (<=1kb)	501
TGME49_266950	Promoter (<=1kb)	1025	165	TGME49_320170	Promoter (<=1kb)	489
TGME49_233500	Promoter (<=1kb)	180	593	TGME49_207350	Distal Intergenic	205
TGME49_315950	Promoter (<=1kb)	194	1011	TGME49_257350	Promoter (<=1kb)	778
TGME49_220060	Distal Intergenic	206	369	TGME49_278600	Promoter (<=1kb)	1294
TGME49_213067	Promoter (<=1kb)	285	301	TGME49_205330	Promoter (<=1kb)	511
TGME49_254960	Promoter (<=1kb)	173	192	TGME49_202620	Promoter (<=1kb)	199
TGME49_273640	Promoter (<=1kb)	486	577	TGME49_224770	Promoter (<=1kb)	290
TGME49_307650	Promoter (<=1kb)	354	5	TGME49_239890	Promoter (<=1kb)	928
TGME49_222860	Promoter (<=1kb)	259	597	TGME49_230205	Promoter (<=1kb)	521
TGME49_271888	Promoter (<=1kb)	570	210	TGME49_219348	Distal Intergenic	590
TGME49_217420	Promoter (<=1kb)	209	209	TGME49_212780	Promoter (<=1kb)	603
TGME49_309810	Promoter (1-2kb)	184	166	TGME49_213050	Promoter (<=1kb)	352
TGME49_215343	Promoter (<=1kb)	643	196	TGME49_260820	Promoter (<=1kb)	499
TGME49_238500	Promoter (<=1kb)	34	317	TGME49_208730	Promoter (<=1kb)	1344
TGME49_223060	Promoter (<=1kb)	175	269	TGME49_289710	Promoter (<=1kb)	662
TGME49_270750	Promoter (1-2kb)	196	59	TGME49_260230	3' UTR	444
TGME49_314250	Promoter (<=1kb)	1029	505	TGME49_219810	Promoter (1-2kb)	977
TGME49_289710	Promoter (<=1kb)	65	132	TGME49_272520	Promoter (<=1kb)	576
TGME49_310420	Promoter (<=1kb)	991	495	TGME49_255300	Promoter (<=1kb)	564
TGME49_201120	Promoter (<=1kb)	139	214	TGME49_318230	Promoter (<=1kb)	238
TGME49_270300	Promoter (<=1kb)	236	188	TGME49_214410	Promoter (1-2kb)	329
TGME49_209050	Promoter (1-2kb)	687	677	TGME49_306235	Promoter (<=1kb)	402
TGME49_310640	Promoter (<=1kb)	324	462	TGME49_292260	Promoter (<=1kb)	224
TGME49_262430	Promoter (1-2kb)	384	298	TGME49_242640	Promoter (<=1kb)	284
TGME49_219485	Promoter (<=1kb)	657	640	TGME49_301140	Promoter (<=1kb)	395
TGME49_297440	Promoter (<=1kb)	613	247	TGME49_275340	Promoter (<=1kb)	777
TGME49_316590	Promoter (<=1kb)	139	1084	TGME49_221380	Promoter (<=1kb)	148
TGME49_320050	Promoter (<=1kb)	463	605	TGME49_206330	Promoter (<=1kb)	297
TGME49_258410	Promoter (<=1kb)	450	539	TGME49_304740	Promoter (<=1kb)	1354
TGME49_309195	Promoter (<=1kb)	68	844	TGME49_245980	Promoter (<=1kb)	736
TGME49_321510	Promoter (1-2kb)	144	572	TGME49_298990	Promoter (<=1kb)	1563
TGME49_286020	Promoter (1-2kb)	603	755	TGME49_321170	Distal Intergenic	449
TGME49_283790	Promoter (1-2kb)	292	981	TGME49_231970	Promoter (<=1kb)	367
TGME49_310010	Promoter (1-2kb)	397	97	TGME49_246330	Promoter (<=1kb)	196
TGME49_251530	Promoter (<=1kb)	76	201	TGME49_315570	Promoter (<=1kb)	524
TGME49_227275	Promoter (1-2kb)	549	155	TGME49_214840	Promoter (<=1kb)	1627
TGME49_266760	Promoter (<=1kb)	82	244	TGME49_300190	Promoter (<=1kb)	174
TGME49_242570	Promoter (<=1kb)	520	501	TGME49_240240	Promoter (<=1kb)	613
TGME49_289980	Promoter (<=1kb)	349	93	TGME49_306190	Promoter (<=1kb)	405
TGME49_232550	Promoter (<=1kb)	228	34	TGME49_202010	Promoter (<=1kb)	894
TGME49_248460	Promoter (<=1kb)	287	200	TGME49_274120	Promoter (<=1kb)	417
TGME49_278390	Promoter (1-2kb)	346	110	TGME49_321650	Promoter (<=1kb)	482
TGME49_234530	Promoter (<=1kb)	114	109	TGME49_222170	Promoter (<=1kb)	1866
TGME49_253770	Distal Intergenic	305	171	TGME49_204020	Promoter (<=1kb)	108
TGME49_268182	Promoter (<=1kb)	360	157	TGME49_257625	Promoter (<=1kb)	420
TGME49_297900	Promoter (<=1kb)	358	140	TGME49_275680	Promoter (<=1kb)	689
TGME49_289380	Promoter (<=1kb)	228	443	TGME49_223060	Promoter (<=1kb)	226
TGME49_237550	Promoter (<=1kb)	481	970	TGME49_222180	Promoter (<=1kb)	400
TGME49_292950	Promoter (1-2kb)	222	226	TGME49_254870	Promoter (<=1kb)	1429
TGME49_232300	Promoter (<=1kb)	704	213	TGME49_223390	Promoter (<=1kb)	714
TGME49_221320	Promoter (<=1kb)	210	169	TGME49_251740	Promoter (<=1kb)	454
TGME49_298990	Promoter (<=1kb)	69	438	TGME49_240810	Promoter (<=1kb)	840
TGME49_283870	Distal Intergenic	574	751	TGME49_203820	Promoter (<=1kb)	202
TGME49_250360	Promoter (<=1kb)	368	607	TGME49_320050	Promoter (<=1kb)	458
TGME49_220420	Promoter (<=1kb)	420	287	TGME49_253030	Promoter (<=1kb)	440
TGME49_278090	Promoter (<=1kb)	29	180	TGME49_290280	3' UTR	573
TGME49_232660	Promoter (<=1kb)	284	15	TGME49_314450	Promoter (<=1kb)	492
TGME49_269885	Promoter (<=1kb)	99	361	TGME49_315140	Promoter (<=1kb)	443
TGME49_210100	Promoter (<=1kb)	431	156	TGME49_313840	Promoter (<=1kb)	839
TGME49_216650	Promoter (1-2kb)	237	237	TGME49_314900	Promoter (1-2kb)	157
TGME49_297340	Promoter (1-2kb)	540	262	TGME49_273120	Promoter (<=1kb)	178
TGME49_203980	Promoter (<=1kb)	360	601	TGME49_209260	Promoter (<=1kb)	143
TGME49_229260	Promoter (<=1kb)	80	87	TGME49_289380	Promoter (<=1kb)	1039
TGME49_269620	Promoter (1-2kb)	208	217	TGME49_281960	Promoter (<=1kb)	675
TGME49_225870	Distal Intergenic	208	184	TGME49_217350	Promoter (1-2kb)	269
TGME49_228170	Promoter (<=1kb)	742	771	TGME49_223790	Promoter (<=1kb)	143
TGME49_220900	Promoter (<=1kb)	162	329	TGME49_286590	Promoter (<=1kb)	1349
TGME49_230170	3' UTR	50	344	TGME49_321480	Promoter (<=1kb)	506
TGME49_276930	Promoter (<=1kb)	312	165	TGME49_234250	Promoter (<=1kb)	688
TGME49_289910	Promoter (<=1kb)	1014	189	TGME49_278750	Promoter (<=1kb)	415
TGME49_223560	Promoter (<=1kb)	1264	422	TGME49_308950	Promoter (<=1kb)	278
TGME49_249240	Promoter (<=1kb)	324	151	TGME49_272560	Promoter (1-2kb)	294
TGME49_268850	Promoter (<=1kb)	448	215	TGME49_283770	Promoter (<=1kb)	183
TGME49_233880	Promoter (<=1kb)	115	156	TGME49_249365	Promoter (<=1kb)	186
TGME49_205670	Promoter (<=1kb)	412	174	TGME49_210095	Promoter (<=1kb)	198
TGME49_267070	Promoter (<=1kb)	133	132	TGME49_209440	Promoter (<=1kb)	418
TGME49_253480	Promoter (<=1kb)	260	89	TGME49_243680	Promoter (<=1kb)	662
TGME49_314070	Promoter (<=1kb)	381	250	TGME49_270510	Promoter (<=1kb)	1226
TGME49_251700	Promoter (<=1kb)	6	591	TGME49_249510	Promoter (<=1kb)	588
TGME49_246210	Promoter (<=1kb)	347	1200	TGME49_253160	Promoter (<=1kb)	808
TGME49_304490	Promoter (<=1kb)	740	606	TGME49_285250	Promoter (1-2kb)	471
TGME49_245432	Promoter (<=1kb)	623	561	TGME49_266990	Promoter (<=1kb)	469
TGME49_208480	Promoter (<=1kb)	72	83	TGME49_213430	Promoter (<=1kb)	355
TGME49_295040	Promoter (<=1kb)	311	45	TGME49_286420	Promoter (<=1kb)	371
TGME49_240880	3' UTR	698	1266	TGME49_201400	Promoter (<=1kb)	284
TGME49_214210	Promoter (<=1kb)	305	355	TGME49_256990	Promoter (<=1kb)	530
TGME49_262480	Promoter (<=1kb)	496	606	TGME49_218370	Promoter (<=1kb)	931
TGME49_288755	Promoter (<=1kb)	1110	729	TGME49_263480	Promoter (<=1kb)	292
TGME49_204410	Promoter (<=1kb)	397	41	TGME49_208550	Promoter (<=1kb)	259
TGME49_242070	5' UTR	4	6	TGME49_297340	Promoter (<=1kb)	238
TGME49_263040	Promoter (<=1kb)	272	366	TGME49_318340	Promoter (<=1kb)	1201
TGME49_238390	Promoter (<=1kb)	112	184	TGME49_288950	Promoter (<=1kb)	1954
TGME49_223920	Promoter (<=1kb)	195	54	TGME49_243220	Promoter (<=1kb)	329
TGME49_232350	Promoter (<=1kb)	211	294	TGME49_239010	Promoter (<=1kb)	409
TGME49_223030	Promoter (<=1kb)	316	137	TGME49_218300	Promoter (<=1kb)	238
TGME49_218300	3' UTR	200	84	TGME49_249440	Promoter (<=1kb)	920
TGME49_202010	Promoter (<=1kb)	202	195	TGME49_281480	Promoter (<=1kb)	651
TGME49_232260	Promoter (<=1kb)	37	2	TGME49_209030	Promoter (<=1kb)	499
TGME49_295030	Promoter (1-2kb)	271	177	TGME49_213020	Promoter (<=1kb)	492
TGME49_219120	Promoter (<=1kb)	736	166	TGME49_243130	Promoter (<=1kb)	1047
TGME49_312310	Promoter (<=1kb)	397	194	TGME49_269417	Promoter (1-2kb)	266
TGME49_224840	Promoter (<=1kb)	238	70	TGME49_313190	Promoter (<=1kb)	542
TGME49_261990	Promoter (<=1kb)	340	708	TGME49_314240	Promoter (1-2kb)	214
TGME49_263070	Promoter (<=1kb)	72	139	TGME49_233140	Promoter (<=1kb)	413
TGME49_270240	Promoter (<=1kb)	1590	607	TGME49_211730	Promoter (<=1kb)	1073
TGME49_321660	Promoter (<=1kb)	128	59	TGME49_289910	Promoter (<=1kb)	452
TGME49_204000	Promoter (<=1kb)	553	434	TGME49_269700	Promoter (1-2kb)	169
TGME49_265520	Promoter (<=1kb)	903	232	TGME49_300260	Promoter (<=1kb)	220
TGME49_226590	3' UTR	23	217	TGME49_288680	Promoter (<=1kb)	194
TGME49_314430	Promoter (<=1kb)	781	165	TGME49_221320	Promoter (<=1kb)	175
TGME49_236950	Promoter (<=1kb)	281	852	TGME49_245560	Promoter (<=1kb)	638
TGME49_248750	Promoter (<=1kb)	170	186	TGME49_297650	Promoter (<=1kb)	393
TGME49_300130	Promoter (<=1kb)	283	767	TGME49_258090	Promoter (<=1kb)	350
TGME49_269425	Distal Intergenic	299	183	TGME49_237090	Promoter (<=1kb)	366
TGME49_201670	Promoter (<=1kb)	246	95	TGME49_218188	Promoter (<=1kb)	214
TGME49_304740	Promoter (<=1kb)	931	941	TGME49_280720	Distal Intergenic	200
TGME49_246120	Promoter (<=1kb)	585	413	TGME49_254940	Promoter (<=1kb)	418
TGME49_232560	Promoter (<=1kb)	655	445	TGME49_286250	Promoter (1-2kb)	590
TGME49_276810	Distal Intergenic	7	68	TGME49_226470	Promoter (<=1kb)	1245
TGME49_290200	Promoter (<=1kb)	171	464	TGME49_313445	Promoter (<=1kb)	357
TGME49_269320	Promoter (<=1kb)	284	626	TGME49_315950	Promoter (<=1kb)	632
TGME49_268980	Promoter (<=1kb)	850	1332	TGME49_219348	Promoter (<=1kb)	170
TGME49_214220	Promoter (<=1kb)	53	381	TGME49_251580	Promoter (1-2kb)	380
TGME49_208440	Promoter (1-2kb)	2	627	TGME49_204420	Promoter (<=1kb)	407
TGME49_271040	Promoter (<=1kb)	2600	204	TGME49_230640	Promoter (<=1kb)	288
TGME49_278400	Promoter (<=1kb)	193	198	TGME49_210300	Promoter (<=1kb)	992
TGME49_295935	Promoter (<=1kb)	202	184	TGME49_301470	Promoter (<=1kb)	1109
TGME49_208730	Promoter (<=1kb)	59	102	TGME49_289980	Promoter (<=1kb)	345
TGME49_315510	Promoter (<=1kb)	189	436	TGME49_203310	Promoter (1-2kb)	432
TGME49_293430	Promoter (<=1kb)	129	285	TGME49_214787	Promoter (<=1kb)	309
TGME49_319360	Promoter (1-2kb)	184	232	TGME49_312570	Promoter (<=1kb)	432
TGME49_251740	Promoter (<=1kb)	588	609	TGME49_313640	Promoter (<=1kb)	274
TGME49_214950	Promoter (<=1kb)	210	65	TGME49_253750	Promoter (1-2kb)	294
TGME49_223880	Promoter (1-2kb)	620	466	TGME49_281580	Promoter (<=1kb)	807
TGME49_289745	Promoter (<=1kb)	179	235	TGME49_315710	Promoter (<=1kb)	827
TGME49_204530	Promoter (<=1kb)	562	351	TGME49_258900	Promoter (<=1kb)	300
TGME49_316590	Promoter (1-2kb)	220	157	TGME49_249180	Promoter (<=1kb)	167
TGME49_277250	Promoter (<=1kb)	99	233	TGME49_225370	Promoter (<=1kb)	481
TGME49_275680	Promoter (<=1kb)	299	267	TGME49_288840	Promoter (<=1kb)	345
TGME49_269300	Promoter (<=1kb)	1119	224	TGME49_270760	Promoter (1-2kb)	814
TGME49_305980	Promoter (1-2kb)	449	182	TGME49_269730	Promoter (<=1kb)	614
TGME49_223410	Promoter (<=1kb)	677	326	TGME49_214970	Promoter (<=1kb)	324
TGME49_226470	Distal Intergenic	137	13	TGME49_227620	Promoter (<=1kb)	153
TGME49_301140	Promoter (<=1kb)	281	48	TGME49_298630	Distal Intergenic	585
TGME49_203815	Promoter (1-2kb)	115	285	TGME49_217720	Promoter (<=1kb)	764
TGME49_249440	Promoter (<=1kb)	331	490	TGME49_238850	Promoter (<=1kb)	311
TGME49_293690	Promoter (1-2kb)	626	354	TGME49_283870	Distal Intergenic	194
TGME49_251550	Promoter (<=1kb)	178	94	TGME49_203170	Promoter (<=1kb)	287
TGME49_246170	Promoter (1-2kb)	342	325	TGME49_268380	Distal Intergenic	236
TGME49_238030	Promoter (<=1kb)	328	214	TGME49_232440	Promoter (<=1kb)	426
TGME49_254890	Promoter (1-2kb)	111	160	TGME49_315370	Promoter (<=1kb)	658
TGME49_295100	Promoter (<=1kb)	609	416	TGME49_313810	Promoter (<=1kb)	1320
TGME49_263100	Promoter (1-2kb)	864	167	TGME49_298090	Distal Intergenic	438
TGME49_220060	Distal Intergenic	459	36	TGME49_240060	Promoter (<=1kb)	735
TGME49_273050	Promoter (<=1kb)	8	196	TGME49_206400	Distal Intergenic	259
TGME49_249030	Promoter (<=1kb)	331	147	TGME49_278365	Distal Intergenic	237
TGME49_221390	Promoter (<=1kb)	372	1002	TGME49_227360	Promoter (<=1kb)	883
TGME49_320680	Promoter (1-2kb)	342	283	TGME49_310670	Promoter (<=1kb)	1135
TGME49_309600	Promoter (<=1kb)	168	267	TGME49_222220	Promoter (<=1kb)	858
TGME49_287460	Promoter (1-2kb)	297	563	TGME49_317830	Distal Intergenic	120
TGME49_206640	Promoter (<=1kb)	966	220	TGME49_202770	Promoter (<=1kb)	558
TGME49_297710	Promoter (<=1kb)	279	86	TGME49_258970	Promoter (1-2kb)	150
TGME49_264210	Promoter (<=1kb)	433	188	TGME49_231970	Promoter (1-2kb)	654
TGME49_212310	3' UTR	198	198	TGME49_200385	Distal Intergenic	297
TGME49_288350	Promoter (<=1kb)	128	248	TGME49_250800	Promoter (<=1kb)	287
TGME49_239890	Promoter (<=1kb)	162	152	TGME49_279100	Promoter (<=1kb)	869
TGME49_228230	Promoter (<=1kb)	177	246	TGME49_307575	Promoter (<=1kb)	1101
TGME49_255700	Promoter (1-2kb)	236	140	TGME49_294790	Promoter (<=1kb)	104
TGME49_238000	Promoter (<=1kb)	173	126	TGME49_266460	Promoter (<=1kb)	807
TGME49_224950	Promoter (<=1kb)	224	387	TGME49_264485	Promoter (<=1kb)	963
TGME49_320490	Promoter (1-2kb)	74	1	TGME49_315510	Promoter (<=1kb)	202
TGME49_255260	Promoter (<=1kb)	307	281	TGME49_321170	Distal Intergenic	123
TGME49_249510	Promoter (<=1kb)	182	638	TGME49_223560	Promoter (<=1kb)	535
TGME49_321490	Promoter (1-2kb)	179	314	TGME49_218362	Promoter (<=1kb)	341
TGME49_270170	Promoter (<=1kb)	1328	365	TGME49_241305	Distal Intergenic	288
TGME49_289520	Promoter (1-2kb)	61	202	TGME49_293440	Promoter (<=1kb)	322
TGME49_208820	Promoter (<=1kb)	237	277	TGME49_205680	Promoter (<=1kb)	421
TGME49_227600	Promoter (<=1kb)	6	584	TGME49_204130	Promoter (<=1kb)	259
TGME49_246070	Promoter (<=1kb)	206	189	TGME49_280490	3' UTR	136
TGME49_312690	Promoter (<=1kb)	1168	153	TGME49_262560	Promoter (<=1kb)	369
TGME49_295910	Promoter (<=1kb)	358	291	TGME49_223870	Promoter (<=1kb)	622
TGME49_203790	Promoter (1-2kb)	281	124	TGME49_282090	Promoter (<=1kb)	347
TGME49_232400	Promoter (1-2kb)	268	341	TGME49_264080	Promoter (<=1kb)	648
TGME49_260620	Promoter (<=1kb)	162	230	TGME49_221390	Promoter (1-2kb)	283
TGME49_293360	Promoter (<=1kb)	356	219	TGME49_313273	Promoter (1-2kb)	540
TGME49_252065	Promoter (1-2kb)	158	142	TGME49_246150	Promoter (<=1kb)	201
TGME49_219100	Promoter (<=1kb)	161	251	TGME49_211710	Promoter (<=1kb)	1348
TGME49_300120	Promoter (<=1kb)	377	129	TGME49_312560	Promoter (<=1kb)	246
TGME49_233490	Promoter (1-2kb)	301	174	TGME49_295630	Promoter (<=1kb)	248
TGME49_288650	Promoter (<=1kb)	346	365	TGME49_265790	Promoter (<=1kb)	205
TGME49_264640	Promoter (<=1kb)	188	998	TGME49_279315	Promoter (<=1kb)	238
TGME49_244460	Promoter (<=1kb)	280	285	TGME49_284310	Promoter (<=1kb)	205
TGME49_224235	Promoter (1-2kb)	380	75	TGME49_271033	Promoter (<=1kb)	240
TGME49_313840	Promoter (<=1kb)	370	35	TGME49_214140	Promoter (1-2kb)	491
TGME49_267160	Promoter (<=1kb)	864	654	TGME49_227980	Promoter (1-2kb)	170
TGME49_271320	Promoter (<=1kb)	250	141	TGME49_314430	Promoter (<=1kb)	391
TGME49_311190	Promoter (<=1kb)	249	756	TGME49_277000	Promoter (<=1kb)	244
TGME49_264630	Promoter (1-2kb)	148	104	TGME49_244270	Promoter (<=1kb)	494
TGME49_207050	Promoter (<=1kb)	662	198	TGME49_297150	Promoter (<=1kb)	160
TGME49_239010	Promoter (<=1kb)	153	177	TGME49_222860	Promoter (<=1kb)	250
TGME49_308950	Promoter (<=1kb)	152	214	TGME49_294970	Promoter (<=1kb)	453
TGME49_220425	Promoter (<=1kb)	282	299	TGME49_256990	Promoter (<=1kb)	269
TGME49_246100	Promoter (<=1kb)	23	3	TGME49_223560	Promoter (<=1kb)	445
TGME49_222390	Promoter (<=1kb)	332	164	TGME49_219485	Promoter (<=1kb)	367
TGME49_311670	Promoter (1-2kb)	37	42	TGME49_283810	Promoter (<=1kb)	429
TGME49_227360	Promoter (<=1kb)	62	323	TGME49_226565	Promoter (<=1kb)	784
TGME49_250220	Promoter (<=1kb)	320	985	TGME49_220330	Promoter (<=1kb)	399
TGME49_267680	Promoter (1-2kb)	256	463	TGME49_240250	Promoter (<=1kb)	327
TGME49_258410	Promoter (<=1kb)	1	349	TGME49_262480	Promoter (<=1kb)	374
TGME49_268450	Promoter (<=1kb)	302	188	TGME49_255220	Promoter (1-2kb)	227
TGME49_259830	Promoter (<=1kb)	435	166	TGME49_229260	Promoter (<=1kb)	792
TGME49_205330	Promoter (<=1kb)	264	289	TGME49_251780	Promoter (<=1kb)	711
TGME49_316310	Promoter (<=1kb)	225	39	TGME49_213380	Promoter (1-2kb)	234
TGME49_254590	Promoter (<=1kb)	135	236	TGME49_297810	Distal Intergenic	275
TGME49_243680	Promoter (<=1kb)	370	382	TGME49_230470	Promoter (<=1kb)	1050
TGME49_224850	Promoter (1-2kb)	230	364	TGME49_249180	3' UTR	540
TGME49_320180	Promoter (1-2kb)	353	663	TGME49_244660	Promoter (<=1kb)	705
TGME49_235460	Promoter (<=1kb)	94	365	TGME49_254330	Promoter (<=1kb)	95
TGME49_316460	Promoter (<=1kb)	293	160	TGME49_319550	3' UTR	242
TGME49_226970	Promoter (<=1kb)	466	242	TGME49_265250	Promoter (1-2kb)	202
TGME49_209910	Promoter (<=1kb)	267	93	TGME49_305630	Promoter (<=1kb)	424
TGME49_234460	Promoter (<=1kb)	413	392	TGME49_202780	Promoter (<=1kb)	281
TGME49_251520	Promoter (<=1kb)	446	82	TGME49_233450	Promoter (<=1kb)	740
TGME49_297650	Promoter (<=1kb)	356	191	TGME49_269470	Promoter (<=1kb)	114
TGME49_318660	Promoter (<=1kb)	241	243	TGME49_219640	Promoter (<=1kb)	1045
TGME49_202940	Promoter (<=1kb)	130	166	TGME49_204370	Promoter (<=1kb)	788
TGME49_249410	Promoter (1-2kb)	196	307	TGME49_239300	5' UTR	229
TGME49_214560	Promoter (<=1kb)	320	148	TGME49_299970	Promoter (<=1kb)	318
TGME49_214950	Promoter (<=1kb)	236	488	TGME49_225540	Promoter (<=1kb)	383
TGME49_286460	Promoter (<=1kb)	592	762	TGME49_288000	Promoter (<=1kb)	214
TGME49_298060	Distal Intergenic	7	143	TGME49_212910	Promoter (<=1kb)	198
TGME49_204050	Promoter (<=1kb)	146	145	TGME49_262670	Promoter (<=1kb)	913
TGME49_277090	Promoter (<=1kb)	20	93	TGME49_269885	Promoter (<=1kb)	241
TGME49_270700	Promoter (1-2kb)	181	175	TGME49_275670	Promoter (<=1kb)	244
TGME49_263590	Promoter (<=1kb)	63	130	TGME49_299070	Promoter (<=1kb)	192
TGME49_249370	Promoter (<=1kb)	297	315	TGME49_209170	Promoter (<=1kb)	515
TGME49_215970	Promoter (<=1kb)	280	551	TGME49_320515	Promoter (<=1kb)	286
TGME49_289680	Promoter (1-2kb)	454	241	TGME49_201250	Promoter (<=1kb)	445
TGME49_237800	Distal Intergenic	144	241	TGME49_258225	Promoter (<=1kb)	184
TGME49_236900	Promoter (<=1kb)	234	5	TGME49_238500	Promoter (<=1kb)	343
TGME49_245450	Distal Intergenic	178	132	TGME49_221370	Promoter (<=1kb)	346
TGME49_295650	Promoter (<=1kb)	342	538	TGME49_203815	Distal Intergenic	120
TGME49_309330	Promoter (1-2kb)	407	227	TGME49_293170	Promoter (<=1kb)	262
TGME49_274700	Distal Intergenic	228	254	TGME49_322500	Distal Intergenic	213
TGME49_205160	Promoter (<=1kb)	562	312	TGME49_208030	Promoter (<=1kb)	528
TGME49_244180	Promoter (<=1kb)	3	239	TGME49_286760	Promoter (<=1kb)	293
TGME49_225230	3' UTR	330	195	TGME49_273640	Promoter (<=1kb)	418
TGME49_214800	Promoter (<=1kb)	336	186	TGME49_269630	Promoter (1-2kb)	238
TGME49_257670	Promoter (1-2kb)	335	151	TGME49_213480	Distal Intergenic	890
TGME49_205680	Promoter (<=1kb)	119	119	TGME49_244200	Promoter (1-2kb)	262
TGME49_247360	Promoter (<=1kb)	543	311	TGME49_313760	Promoter (<=1kb)	199
TGME49_320592	Promoter (<=1kb)	85	153	TGME49_253380	Promoter (<=1kb)	1095
TGME49_215910	Promoter (<=1kb)	1832	781	TGME49_239830	Promoter (<=1kb)	134
TGME49_254625	3' UTR	257	7	TGME49_245660	Promoter (<=1kb)	405
TGME49_266460	Promoter (<=1kb)	137	541	TGME49_293760	Promoter (<=1kb)	258
TGME49_204330	Promoter (<=1kb)	378	591	TGME49_269180	Promoter (1-2kb)	256
TGME49_209050	Promoter (<=1kb)	358	609	TGME49_226940	Promoter (<=1kb)	222
TGME49_249425	Promoter (1-2kb)	403	113	TGME49_293060	Promoter (<=1kb)	558
TGME49_293760	Promoter (<=1kb)	393	407	TGME49_309330	Promoter (1-2kb)	119
TGME49_208030	Promoter (<=1kb)	1032	204	TGME49_262050	Promoter (<=1kb)	220
TGME49_245770	Promoter (<=1kb)	233	199	TGME49_289360	Promoter (<=1kb)	182
TGME49_219660	Distal Intergenic	73	83	TGME49_320260	Promoter (1-2kb)	402
TGME49_205280	Promoter (<=1kb)	214	182	TGME49_221540	Promoter (<=1kb)	385
TGME49_310100	Promoter (<=1kb)	227	383	TGME49_269438	Promoter (<=1kb)	884
TGME49_271030	Promoter (<=1kb)	64	286	TGME49_279350	Promoter (<=1kb)	651
TGME49_276170	Promoter (<=1kb)	197	6	TGME49_266900	Promoter (<=1kb)	419
TGME49_294200	Promoter (<=1kb)	300	268	TGME49_239260	Promoter (<=1kb)	267
TGME49_319850	Promoter (<=1kb)	187	184	TGME49_259560	Promoter (<=1kb)	135
TGME49_266900	Promoter (<=1kb)	411	746	TGME49_258020	Promoter (1-2kb)	208
TGME49_306500	Promoter (<=1kb)	113	404	TGME49_233220	Promoter (<=1kb)	341
TGME49_202620	Promoter (<=1kb)	33	49	TGME49_236550	Promoter (<=1kb)	151
TGME49_262460	Promoter (<=1kb)	125	99	TGME49_236650	Promoter (1-2kb)	91
TGME49_200240	Promoter (<=1kb)	135	139	TGME49_311240	Promoter (<=1kb)	837
TGME49_313520	Promoter (<=1kb)	195	78	TGME49_320770	Promoter (<=1kb)	174
TGME49_320770	Distal Intergenic	64	367	TGME49_236860	Promoter (<=1kb)	1257
TGME49_300040	Promoter (<=1kb)	5	297	TGME49_257120	Promoter (<=1kb)	124
TGME49_217540	Promoter (<=1kb)	87	243	TGME49_275610	Promoter (<=1kb)	74
TGME49_271033	Promoter (<=1kb)	661	2349	TGME49_252620	Promoter (1-2kb)	226
TGME49_264260	Distal Intergenic	197	113	TGME49_301170	Promoter (<=1kb)	229
TGME49_276950	Promoter (<=1kb)	199	465	TGME49_240090	Promoter (<=1kb)	1260
TGME49_232400	Promoter (<=1kb)	613	751	TGME49_204410	Promoter (<=1kb)	349
TGME49_275330	Promoter (<=1kb)	1429	297	TGME49_225905	Promoter (<=1kb)	225
TGME49_318470	Promoter (1-2kb)	200	283	TGME49_235470	Promoter (<=1kb)	577
TGME49_215360	Promoter (<=1kb)	298	303	TGME49_311230	Promoter (<=1kb)	420
TGME49_269438	Promoter (<=1kb)	171	57	TGME49_311320	Promoter (<=1kb)	495
TGME49_204020	Promoter (<=1kb)	114	41	TGME49_248740	Promoter (<=1kb)	591
TGME49_318220	Promoter (<=1kb)	513	445	TGME49_298020	Promoter (1-2kb)	123
TGME49_252360	Promoter (<=1kb)	251	422	TGME49_203160	Promoter (<=1kb)	816
TGME49_249600	Distal Intergenic	7	8	TGME49_265140	Promoter (<=1kb)	139
TGME49_237090	Promoter (<=1kb)	75	351	TGME49_224000	Promoter (<=1kb)	566
TGME49_207200	Promoter (<=1kb)	67	316	TGME49_225770	Promoter (<=1kb)	545
TGME49_270190	Promoter (<=1kb)	8	323	TGME49_301160	Promoter (<=1kb)	202
TGME49_310490	Promoter (<=1kb)	516	404	TGME49_220110	Promoter (<=1kb)	280
TGME49_247350	Promoter (<=1kb)	97	664	TGME49_238010	Distal Intergenic	820
TGME49_293440	Promoter (<=1kb)	166	669	TGME49_239260	Promoter (<=1kb)	281
TGME49_254915	Promoter (1-2kb)	639	254	TGME49_310970	Promoter (<=1kb)	499
TGME49_298820	Distal Intergenic	98	291	TGME49_300150	Promoter (<=1kb)	428
TGME49_200310	Promoter (<=1kb)	865	1290	TGME49_278660	Promoter (<=1kb)	507
TGME49_209030	Promoter (<=1kb)	167	161	TGME49_278380	Promoter (<=1kb)	463
TGME49_200700	Distal Intergenic	133	23	TGME49_301210	Promoter (<=1kb)	216
TGME49_280480	Promoter (<=1kb)	216	216	TGME49_271930	Promoter (<=1kb)	493
TGME49_214970	Promoter (<=1kb)	234	117	TGME49_220080	Promoter (<=1kb)	166
TGME49_255220	Promoter (1-2kb)	608	357	TGME49_269350	Promoter (1-2kb)	200
TGME49_246540	Promoter (<=1kb)	157	237	TGME49_314240	Promoter (<=1kb)	152
TGME49_204130	Promoter (1-2kb)	85	279	TGME49_234930	Promoter (<=1kb)	295
TGME49_277220	3' UTR	165	19	TGME49_295030	Promoter (1-2kb)	282
TGME49_219742	Promoter (<=1kb)	392	983	TGME49_244500	Promoter (<=1kb)	441
TGME49_203540	Promoter (1-2kb)	388	302	TGME49_262780	Promoter (<=1kb)	327
TGME49_275690	Promoter (<=1kb)	243	191	TGME49_262540	Promoter (1-2kb)	166
TGME49_251850	Promoter (<=1kb)	153	77	TGME49_262450	Promoter (<=1kb)	622
TGME49_273990	Promoter (1-2kb)	151	12	TGME49_231125	Promoter (<=1kb)	886
TGME49_217890	Promoter (<=1kb)	286	1	TGME49_237200	Promoter (<=1kb)	191
TGME49_209040	3' UTR	175	163	TGME49_214220	Promoter (<=1kb)	279
TGME49_250500	3' UTR	480	261	TGME49_300140	Promoter (<=1kb)	965
TGME49_268780	Promoter (<=1kb)	344	2	TGME49_249340	Promoter (<=1kb)	315
TGME49_250830	Promoter (<=1kb)	553	2	TGME49_278860	Promoter (1-2kb)	400
TGME49_272680	Distal Intergenic	250	230	TGME49_221330	Promoter (<=1kb)	390
TGME49_248990	Promoter (<=1kb)	345	0	TGME49_273595	Promoter (1-2kb)	300
TGME49_249590	Distal Intergenic	160	368	TGME49_266750	Promoter (<=1kb)	839
TGME49_221560	Distal Intergenic	221	245	TGME49_250840	Promoter (<=1kb)	410
TGME49_243970	Promoter (1-2kb)	413	388	TGME49_209910	Promoter (<=1kb)	837
TGME49_272520	Promoter (<=1kb)	937	287	TGME49_318650	Promoter (<=1kb)	922
TGME49_218300	Promoter (<=1kb)	169	529	TGME49_244460	Promoter (<=1kb)	866
TGME49_282070	Promoter (1-2kb)	151	126	TGME49_262410	Promoter (<=1kb)	809
TGME49_245485	Promoter (1-2kb)	191	197	TGME49_224250	Promoter (<=1kb)	1010
TGME49_249540	5' UTR	51	238	TGME49_315740	Promoter (<=1kb)	385
TGME49_267450	Promoter (<=1kb)	200	229	TGME49_278740	Promoter (<=1kb)	210
TGME49_224110	Promoter (<=1kb)	15	149	TGME49_209440	Promoter (1-2kb)	153
TGME49_237015	Promoter (<=1kb)	332	157	TGME49_200330	Promoter (<=1kb)	172
TGME49_217875	Promoter (<=1kb)	7	127	TGME49_229390	Promoter (<=1kb)	537
TGME49_257530	Promoter (<=1kb)	562	355	TGME49_207820	Promoter (1-2kb)	512
TGME49_236670	Promoter (<=1kb)	225	225	TGME49_207060	Promoter (<=1kb)	241
TGME49_240500	Promoter (<=1kb)	1	148	TGME49_262960	Promoter (<=1kb)	550
TGME49_205210	3' UTR	155	42	TGME49_207600	Promoter (<=1kb)	207
TGME49_219730	Promoter (<=1kb)	208	29	TGME49_319370	Promoter (<=1kb)	328
TGME49_309865	Promoter (<=1kb)	222	241	TGME49_281930	Promoter (<=1kb)	618
TGME49_253500	Promoter (<=1kb)	250	8	TGME49_280380	Promoter (<=1kb)	126
TGME49_218590	Distal Intergenic	1125	176	TGME49_232550	Promoter (<=1kb)	796
TGME49_222260	Promoter (<=1kb)	247	45	TGME49_234540	Promoter (<=1kb)	186
TGME49_262410	Promoter (<=1kb)	247	473	TGME49_247530	Promoter (<=1kb)	134
TGME49_212290	Promoter (<=1kb)	294	441	TGME49_277510	Promoter (<=1kb)	505
TGME49_203600	Promoter (1-2kb)	638	236	TGME49_310390	Promoter (<=1kb)	186
TGME49_243180	Promoter (1-2kb)	199	190	TGME49_260450	Promoter (<=1kb)	216
TGME49_316570	Promoter (<=1kb)	121	630	TGME49_292375	Promoter (<=1kb)	259
TGME49_228770	Promoter (<=1kb)	209	242	TGME49_231600	Promoter (<=1kb)	370
TGME49_204020	Promoter (<=1kb)	168	262	TGME49_301400	Promoter (<=1kb)	532
TGME49_319340	Promoter (<=1kb)	143	209	TGME49_265320	Promoter (<=1kb)	449
TGME49_224990	Promoter (<=1kb)	82	18	TGME49_257790	Promoter (<=1kb)	221
TGME49_262710	Promoter (<=1kb)	18	177	TGME49_232350	Promoter (<=1kb)	608
TGME49_250800	Promoter (<=1kb)	171	3	TGME49_311310	Promoter (<=1kb)	101
TGME49_300270	Promoter (<=1kb)	187	184	TGME49_309210	Promoter (1-2kb)	285
TGME49_233810	Promoter (<=1kb)	207	151	TGME49_300220	Promoter (<=1kb)	691
TGME49_201190	Promoter (1-2kb)	389	121	TGME49_278660	Promoter (<=1kb)	218
TGME49_269710	Promoter (<=1kb)	128	443	TGME49_228120	Promoter (<=1kb)	1265
TGME49_254660	Promoter (<=1kb)	242	14	TGME49_311000	Promoter (<=1kb)	340
TGME49_277260	5' UTR	43	100	TGME49_320150	Promoter (<=1kb)	130
TGME49_246640	Promoter (<=1kb)	1	138	TGME49_278365	Promoter (1-2kb)	213
TGME49_270920	Promoter (<=1kb)	428	320	TGME49_210690	Promoter (<=1kb)	111
TGME49_214940	Promoter (<=1kb)	1117	214	TGME49_225850	Promoter (<=1kb)	231
TGME49_202680	Promoter (<=1kb)	15	339	TGME49_294705	Promoter (1-2kb)	677
TGME49_275470	Promoter (<=1kb)	44	214	TGME49_264610	5' UTR	160
TGME49_234230	Promoter (1-2kb)	102	8	TGME49_213060	Promoter (<=1kb)	541
TGME49_219820	3' UTR	347	48	TGME49_226290	Promoter (<=1kb)	823
TGME49_289970	Promoter (<=1kb)	238	4	TGME49_217730	Promoter (<=1kb)	150
TGME49_232280	Promoter (<=1kb)	566	91	TGME49_247390	Promoter (<=1kb)	333
TGME49_228150	Promoter (1-2kb)	156	266	TGME49_248140	Promoter (<=1kb)	180
TGME49_257080	Promoter (1-2kb)	617	83	TGME49_221990	Promoter (<=1kb)	96
TGME49_232260	Promoter (<=1kb)	1	257	TGME49_212190	Promoter (1-2kb)	449
TGME49_233450	Promoter (<=1kb)	1007	173	TGME49_278430	Promoter (<=1kb)	322
TGME49_219218	5' UTR	24	183	TGME49_223140	3' UTR	190
TGME49_308860	Promoter (<=1kb)	903	9	TGME49_285810	Promoter (<=1kb)	585
TGME49_246200	Promoter (<=1kb)	7	179	TGME49_261390	Promoter (<=1kb)	479
TGME49_276920	Promoter (<=1kb)	2163	857	TGME49_320200	Promoter (<=1kb)	232
TGME49_270180	Promoter (<=1kb)	111	138	TGME49_306270	Promoter (<=1kb)	280
TGME49_233120	Promoter (1-2kb)	4	131	TGME49_295050	Promoter (<=1kb)	147
TGME49_207380	Promoter (<=1kb)	71	135	TGME49_295350	Promoter (<=1kb)	151
TGME49_233480	Promoter (<=1kb)	523	822	TGME49_301350	Promoter (1-2kb)	310
TGME49_225200	Promoter (<=1kb)	379	131	TGME49_284580	Promoter (<=1kb)	198
TGME49_231880	Promoter (<=1kb)	72	3	TGME49_212900	Promoter (<=1kb)	427
TGME49_309730	Promoter (1-2kb)	0	109	TGME49_262390	Promoter (1-2kb)	212
TGME49_269700	Promoter (1-2kb)	262	291	TGME49_263100	Promoter (<=1kb)	428
TGME49_310520	Promoter (<=1kb)	511	809	TGME49_234530	Promoter (<=1kb)	593
TGME49_229920	Promoter (<=1kb)	142	59	TGME49_235010	Promoter (<=1kb)	204
TGME49_203820	Promoter (<=1kb)	226	759	TGME49_236290	Promoter (1-2kb)	278
TGME49_240630	Promoter (<=1kb)	64	228	TGME49_313270	Promoter (1-2kb)	748
TGME49_223940	Promoter (<=1kb)	197	181	TGME49_237890	Promoter (<=1kb)	235
TGME49_238270	Promoter (1-2kb)	304	244	TGME49_300048	Promoter (1-2kb)	241
TGME49_220060	Distal Intergenic	198	260	TGME49_209170	Promoter (<=1kb)	72
TGME49_246020	Promoter (1-2kb)	289	247	TGME49_253800	3' UTR	784
TGME49_251740	Promoter (<=1kb)	26	259	TGME49_234190	Promoter (<=1kb)	626
TGME49_253840	Promoter (<=1kb)	68	2	TGME49_208430	Promoter (<=1kb)	405
TGME49_215890	3' UTR	6	29	TGME49_294760	Promoter (<=1kb)	231
TGME49_287235	3' UTR	319	196	TGME49_221210	Promoter (<=1kb)	609
TGME49_203320	Promoter (<=1kb)	157	216	TGME49_301400	5' UTR	106
TGME49_219540	Promoter (<=1kb)	321	159	TGME49_304870	Distal Intergenic	1201
TGME49_267140	Promoter (<=1kb)	720	693	TGME49_244335	Promoter (<=1kb)	346
TGME49_203815	Promoter (<=1kb)	315	77	TGME49_201230	Promoter (<=1kb)	117
TGME49_224050	Promoter (1-2kb)	73	70	TGME49_260510	Promoter (<=1kb)	431
TGME49_315190	Promoter (<=1kb)	397	612	TGME49_259270	Promoter (<=1kb)	160
TGME49_205700	Promoter (<=1kb)	758	278	TGME49_224790	Promoter (<=1kb)	250
TGME49_247025	Promoter (<=1kb)	357	14	TGME49_309170	Promoter (<=1kb)	217
TGME49_213870	Promoter (<=1kb)	233	477	TGME49_218590	Distal Intergenic	143
TGME49_250770	Promoter (1-2kb)	262	240	TGME49_247400	Promoter (<=1kb)	159
TGME49_298090	Distal Intergenic	506	210	TGME49_248460	Promoter (<=1kb)	176
TGME49_271182	Promoter (<=1kb)	21	16	TGME49_229020	Promoter (<=1kb)	637
TGME49_203990	Promoter (<=1kb)	382	351	TGME49_240340	Promoter (<=1kb)	456
TGME49_217890	Promoter (1-2kb)	217	170	TGME49_228290	Promoter (<=1kb)	404
TGME49_254480	3' UTR	281	0	TGME49_217670	3' UTR	420
TGME49_214100	Promoter (1-2kb)	56	83	TGME49_271080	Promoter (1-2kb)	724
TGME49_244450	Promoter (<=1kb)	888	599	TGME49_304490	Promoter (<=1kb)	913
TGME49_311240	Promoter (<=1kb)	178	134	TGME49_275355	Distal Intergenic	194
TGME49_218380	Promoter (<=1kb)	262	509	TGME49_281575	Promoter (<=1kb)	260
TGME49_219810	Promoter (<=1kb)	273	438	TGME49_236200	Promoter (<=1kb)	114
TGME49_225930	Promoter (<=1kb)	174	7	TGME49_307015	Promoter (<=1kb)	189
TGME49_316590	Promoter (1-2kb)	327	43	TGME49_312340	Promoter (<=1kb)	79
TGME49_286420	Promoter (<=1kb)	617	845	TGME49_200320	3' UTR	155
TGME49_249390	Promoter (1-2kb)	232	227	TGME49_280700	Promoter (<=1kb)	275
TGME49_263020	Promoter (<=1kb)	222	215	TGME49_257550	Promoter (<=1kb)	178
TGME49_215530	Promoter (<=1kb)	1	166	TGME49_209950	Promoter (<=1kb)	179
TGME49_214930	Promoter (<=1kb)	318	306	TGME49_208450	Promoter (<=1kb)	629
TGME49_264225	Promoter (<=1kb)	348	504	TGME49_221620	Promoter (<=1kb)	247
TGME49_214750	Promoter (1-2kb)	320	7	TGME49_319930	Promoter (1-2kb)	799
TGME49_258390	Promoter (1-2kb)	63	2	TGME49_305160	Promoter (<=1kb)	276
TGME49_279420	Promoter (<=1kb)	164	454	TGME49_241840	Promoter (<=1kb)	267
TGME49_257520	Promoter (<=1kb)	533	397	TGME49_205280	Promoter (<=1kb)	621
TGME49_313240	Promoter (<=1kb)	373	318	TGME49_202900	Promoter (<=1kb)	500
TGME49_266620	3' UTR	40	150	TGME49_201670	Promoter (<=1kb)	238
TGME49_273120	Promoter (<=1kb)	2	2	TGME49_273400	Promoter (1-2kb)	238
TGME49_313630	Distal Intergenic	188	92	TGME49_223725	Promoter (<=1kb)	840
TGME49_237230	Promoter (<=1kb)	143	729	TGME49_247220	Promoter (<=1kb)	205
TGME49_261570	Promoter (<=1kb)	156	5	TGME49_250850	Promoter (1-2kb)	385
TGME49_276990	Promoter (<=1kb)	290	614	TGME49_255420	Promoter (<=1kb)	245
TGME49_200600	Distal Intergenic	1	219	TGME49_306890	Promoter (<=1kb)	543
TGME49_269730	Promoter (<=1kb)	320	288	TGME49_215260	Promoter (<=1kb)	368
TGME49_235630	Distal Intergenic	336	89	TGME49_210820	Promoter (<=1kb)	788
TGME49_281930	Promoter (<=1kb)	461	169	TGME49_220600	Promoter (<=1kb)	734
TGME49_321500	Promoter (<=1kb)	298	519	TGME49_247250	Promoter (<=1kb)	207
TGME49_252190	Promoter (1-2kb)	621	862	TGME49_314000	Promoter (<=1kb)	89
TGME49_249850	Promoter (<=1kb)	249	210	TGME49_310470	Promoter (<=1kb)	237
TGME49_206320	Promoter (<=1kb)	158	0	TGME49_207600	Promoter (<=1kb)	244
TGME49_266080	Promoter (1-2kb)	397	207	TGME49_215343	Promoter (1-2kb)	177
TGME49_247440	Promoter (<=1kb)	125	248	TGME49_291630	Promoter (<=1kb)	1049
TGME49_297970	Promoter (<=1kb)	283	243	TGME49_259200	Promoter (<=1kb)	93
TGME49_227440	Promoter (<=1kb)	4	508	TGME49_250090	Promoter (<=1kb)	160
TGME49_240640	Promoter (1-2kb)	279	587	TGME49_282120	Promoter (1-2kb)	292
TGME49_261400	Promoter (<=1kb)	252	311	TGME49_264225	Promoter (<=1kb)	204
TGME49_311730	Promoter (<=1kb)	510	176	TGME49_225020	Promoter (<=1kb)	415
TGME49_311390	Promoter (<=1kb)	368	473	TGME49_216810	Promoter (1-2kb)	195
TGME49_288840	Promoter (<=1kb)	2	364	TGME49_218200	Promoter (<=1kb)	329
TGME49_259965	Exon (TGME49_259965-t26_1/TGME49_259965	748	595	TGME49_258380	Promoter (<=1kb)	196
TGME49_244700	Intron (TGME49_244700-t26_1/TGME49_244700	166	169	TGME49_222930	Promoter (<=1kb)	734
TGME49_301240	Exon (TGME49_301240-t26_1/TGME49_301240	703	169	TGME49_234230	Promoter (1-2kb)	156
TGME49_209030	Exon (TGME49_209030-t26_1/TGME49_209030	121	228	TGME49_226410	Promoter (<=1kb)	348
TGME49_304930	Intron (TGME49_304955-t26_1/TGME49_304955	142	204	TGME49_288370	Promoter (1-2kb)	77
TGME49_233500	Exon (TGME49_233500-t26_1/TGME49_233500	945	319	TGME49_209130	Promoter (<=1kb)	163
TGME49_295945	Exon (TGME49_295935-t26_1/TGME49_295935	223	266	TGME49_286740	Promoter (<=1kb)	118
TGME49_318610	Exon (TGME49_318610-t26_1/TGME49_318610	511	102	TGME49_255190	Promoter (<=1kb)	391
TGME49_310750	Exon (TGME49_310750-t26_1/TGME49_310750	193	343	TGME49_235960	Promoter (<=1kb)	213
TGME49_260030	Exon (TGME49_260030-t26_1/TGME49_260030	111	125	TGME49_262430	Distal Intergenic	470
TGME49_273780	Exon (TGME49_273780-t26_1/TGME49_273780	298	65	TGME49_311680	Promoter (<=1kb)	933
TGME49_211730	Exon (TGME49_211730-t26_1/TGME49_211730	344	416	TGME49_210100	Promoter (<=1kb)	85
TGME49_228160	Exon (TGME49_228160-t26_1/TGME49_228160	202	686	TGME49_295650	Promoter (<=1kb)	315
TGME49_276920	Exon (TGME49_276920-t26_1/TGME49_276920	117	243	TGME49_221190	Promoter (<=1kb)	380
TGME49_262910	Exon (TGME49_262910-t26_1/TGME49_262910	147	499	TGME49_239430	Promoter (1-2kb)	136
TGME49_257670	Exon (TGME49_257670-t26_1/TGME49_257670	1274	959	TGME49_203150	Promoter (<=1kb)	210
TGME49_222160	Exon (TGME49_222160-t26_1/TGME49_222160	148	209	TGME49_228780	Promoter (<=1kb)	130
TGME49_249620	Exon (TGME49_249620-t26_1/TGME49_249620	78	143	TGME49_227970	Promoter (<=1kb)	206
TGME49_267680	Exon (TGME49_267680-t26_1/TGME49_267680	328	243	TGME49_310310	Promoter (<=1kb)	178
TGME49_228160	Exon (TGME49_228160-t26_1/TGME49_228160	5	4	TGME49_314810	Promoter (<=1kb)	437
TGME49_257680	Exon (TGME49_257670-t26_1/TGME49_257670	190	587	TGME49_219070	Promoter (1-2kb)	382
TGME49_230535	Exon (TGME49_230555-t26_1/TGME49_230555	8	48	TGME49_235670	Promoter (<=1kb)	160
TGME49_301400	Exon (TGME49_301400-t26_1/TGME49_301400	153	514	TGME49_273050	Promoter (<=1kb)	162
TGME49_219800	Exon (TGME49_219800-t26_1/TGME49_219800	11	7	TGME49_315170	Promoter (1-2kb)	432
TGME49_232970	Exon (TGME49_232970-t26_1/TGME49_232970	294	199	TGME49_208740	Promoter (<=1kb)	618
TGME49_260520	Exon (TGME49_260520-t26_1/TGME49_260520	300	8	TGME49_225780	Promoter (<=1kb)	164
TGME49_310885	Exon (TGME49_310900-t26_1/TGME49_310900	264	630	TGME49_276900	Promoter (<=1kb)	247
TGME49_264182	Exon (TGME49_264178-t26_1/TGME49_264178	86	507	TGME49_219440	Promoter (<=1kb)	61
TGME49_268600	Exon (TGME49_268600-t26_1/TGME49_268600	199	4	TGME49_286120	Promoter (<=1kb)	225
TGME49_250800	Exon (TGME49_250800-t26_1/TGME49_250800	41	268	TGME49_257960	Promoter (1-2kb)	214
TGME49_257680	Exon (TGME49_257670-t26_1/TGME49_257670	183	1115	TGME49_252360	Promoter (<=1kb)	298
TGME49_313910	Exon (TGME49_313910-t26_1/TGME49_313910	177	129	TGME49_318370	Promoter (<=1kb)	187
TGME49_206640	Exon (TGME49_206640-t26_1/TGME49_206640	121	128	TGME49_283450	Promoter (<=1kb)	540
TGME49_270840	Exon (TGME49_270840-t26_1/TGME49_270840	301	413	TGME49_260210	Promoter (<=1kb)	200
TGME49_288465	Exon (TGME49_288475-t26_1/TGME49_288475	234	24	TGME49_273850	Promoter (<=1kb)	221
TGME49_215890	Intron (TGME49_215895-t26_1/TGME49_215895	201	119	TGME49_226250	Promoter (<=1kb)	84
TGME49_217910	Exon (TGME49_217910-t26_1/TGME49_217910	432	3	TGME49_313910	Promoter (1-2kb)	130
TGME49_295920	Exon (TGME49_295920-t26_1/TGME49_295920	0	424	TGME49_265510	Promoter (<=1kb)	250
TGME49_243800	Exon (TGME49_243800-t26_1/TGME49_243800	61	191	TGME49_233702	Promoter (<=1kb)	227
TGME49_248750	Exon (TGME49_248750-t26_1/TGME49_248750	4	140	TGME49_239740	Promoter (<=1kb)	163
TGME49_310390	Intron (TGME49_310390-t26_1/TGME49_310390	153	52	TGME49_315910	Promoter (<=1kb)	113
TGME49_204420	Exon (TGME49_204410-t26_1/TGME49_204410	358	7	TGME49_233530	Promoter (<=1kb)	256
TGME49_225490	Exon (TGME49_225490-t26_1/TGME49_225490	211	130	TGME49_237180	Promoter (<=1kb)	196
TGME49_239475	Exon (TGME49_239475-t26_1/TGME49_239475	267	74	TGME49_227150	Promoter (<=1kb)	238
TGME49_224620	Intron (TGME49_224620-t26_1/TGME49_224620	0	250	TGME49_306342	Promoter (<=1kb)	295
TGME49_293372	Exon (TGME49_297380-t26_1/TGME49_297380	379	407	TGME49_231850	Promoter (<=1kb)	218
TGME49_235402	Exon (TGME49_235420-t26_1/TGME49_235420	264	0	TGME49_235630	Promoter (<=1kb)	390
TGME49_239270	Exon (TGME49_239270-t26_1/TGME49_239270	113	2	TGME49_219280	Promoter (<=1kb)	160
				TGME49_314715	Promoter (<=1kb)	319
				TGME49_293650	Distal Intergenic	203
				TGME49_299210	Promoter (<=1kb)	210
				TGME49_210678	Distal Intergenic	617
				TGME49_210412	Promoter (<=1kb)	357
				TGME49_299570	Promoter (1-2kb)	198
				TGME49_284180	Promoter (1-2kb)	1006
				TGME49_244470	Promoter (<=1kb)	711
				TGME49_280580	Promoter (<=1kb)	209
				TGME49_201380	Promoter (<=1kb)	89
				TGME49_262460	Promoter (<=1kb)	511
				TGME49_261670	Promoter (<=1kb)	168
				TGME49_232410	Promoter (<=1kb)	860
				TGME49_272710	Promoter (1-2kb)	630
				TGME49_270170	Promoter (<=1kb)	475
				TGME49_200250	Promoter (<=1kb)	125
				TGME49_228760	Promoter (<=1kb)	197
				TGME49_224760	Promoter (<=1kb)	233
				TGME49_228170	Promoter (<=1kb)	1190
				TGME49_306860	Promoter (<=1kb)	123
				TGME49_316140	Promoter (<=1kb)	174
				TGME49_216720	Promoter (<=1kb)	1277
				TGME49_217500	Promoter (<=1kb)	202
				TGME49_246170	5' UTR	643
				TGME49_274190	Promoter (<=1kb)	313
				TGME49_262920	Promoter (<=1kb)	198
				TGME49_284645	Promoter (<=1kb)	424
				TGME49_205360	Promoter (<=1kb)	132
				TGME49_239010	Promoter (<=1kb)	301
				TGME49_238490	Promoter (<=1kb)	124
				TGME49_246590	Promoter (<=1kb)	283
				TGME49_219800	Promoter (<=1kb)	646
				TGME49_209210	Promoter (1-2kb)	144
				TGME49_209450	Promoter (<=1kb)	54
				TGME49_253860	Promoter (<=1kb)	208
				TGME49_252190	Promoter (1-2kb)	192
				TGME49_220610	Promoter (<=1kb)	87
				TGME49_240380	Promoter (<=1kb)	555
				TGME49_241240	Promoter (<=1kb)	88
				TGME49_239770	Promoter (<=1kb)	695
				TGME49_279550	Promoter (1-2kb)	144
				TGME49_206700	Promoter (<=1kb)	138
				TGME49_206450	Promoter (<=1kb)	175
				TGME49_261570	Promoter (<=1kb)	180
				TGME49_259830	Promoter (<=1kb)	420
				TGME49_231840	Promoter (1-2kb)	776
				TGME49_232230	Promoter (<=1kb)	557
				TGME49_269705	Promoter (<=1kb)	196
				TGME49_227275	Promoter (1-2kb)	544
				TGME49_228470	Promoter (<=1kb)	126
				TGME49_310860	Promoter (<=1kb)	262
				TGME49_312175	Promoter (<=1kb)	461
				TGME49_309160	Promoter (<=1kb)	293
				TGME49_316900	Distal Intergenic	205
				TGME49_217550	Promoter (<=1kb)	188
				TGME49_313665	Promoter (<=1kb)	207
				TGME49_249850	Promoter (1-2kb)	462
				TGME49_311700	Promoter (1-2kb)	95
				TGME49_266630	Promoter (1-2kb)	139
				TGME49_252255	Distal Intergenic	214
				TGME49_226590	Promoter (1-2kb)	94
				TGME49_306380	Promoter (<=1kb)	1494
				TGME49_264650	Promoter (<=1kb)	222
				TGME49_243580	Promoter (<=1kb)	85
				TGME49_296000	Promoter (<=1kb)	81
				TGME49_220640	3' UTR	144
				TGME49_310490	Promoter (<=1kb)	264
				TGME49_287270	Distal Intergenic	254
				TGME49_262110	Promoter (1-2kb)	197
				TGME49_295300	Promoter (<=1kb)	555
				TGME49_321440	Promoter (<=1kb)	141
				TGME49_297720	Promoter (<=1kb)	202
				TGME49_221410	Promoter (<=1kb)	245
				TGME49_289710	Distal Intergenic	500
				TGME49_267140	Promoter (<=1kb)	209
				TGME49_284190	Promoter (<=1kb)	658
				TGME49_283870	Distal Intergenic	637
				TGME49_220470	Promoter (1-2kb)	209
				TGME49_212980	Promoter (<=1kb)	179
				TGME49_230380	Promoter (<=1kb)	225
				TGME49_237520	Promoter (<=1kb)	155
				TGME49_275480	Promoter (<=1kb)	380
				TGME49_315620	Promoter (1-2kb)	370
				TGME49_300310	Promoter (<=1kb)	169
				TGME49_278400	Promoter (<=1kb)	71
				TGME49_212300	Promoter (<=1kb)	575
				TGME49_249870	Promoter (<=1kb)	316
				TGME49_285740	Promoter (<=1kb)	317
				TGME49_215955	Promoter (<=1kb)	280
				TGME49_310920	Promoter (1-2kb)	542
				TGME49_270655	Distal Intergenic	219
				TGME49_294200	Promoter (<=1kb)	196
				TGME49_293510	Promoter (<=1kb)	383
				TGME49_202330	Promoter (<=1kb)	1289
				TGME49_222350	Promoter (<=1kb)	547
				TGME49_239020	Promoter (<=1kb)	77
				TGME49_296950	Promoter (<=1kb)	331
				TGME49_293730	Promoter (<=1kb)	244
				TGME49_290630	Promoter (<=1kb)	131
				TGME49_305590	Promoter (<=1kb)	221
				TGME49_293630	Distal Intergenic	365
				TGME49_293320	Promoter (<=1kb)	233
				TGME49_220890	Promoter (<=1kb)	308
				TGME49_319340	Promoter (<=1kb)	153
				TGME49_211680	Promoter (<=1kb)	239
				TGME49_205470	Promoter (<=1kb)	420
				TGME49_202550	Promoter (<=1kb)	221
				TGME49_281950	Promoter (1-2kb)	369
				TGME49_256960	Promoter (<=1kb)	153
				TGME49_231140	Promoter (<=1kb)	162
				TGME49_232160	Promoter (1-2kb)	567
				TGME49_225160	Promoter (<=1kb)	103
				TGME49_214250	Promoter (<=1kb)	225
				TGME49_214750	Promoter (<=1kb)	345
				TGME49_214800	Promoter (<=1kb)	523
				TGME49_315080	Promoter (<=1kb)	218
				TGME49_217688	Promoter (<=1kb)	559
				TGME49_276910	Promoter (<=1kb)	667
				TGME49_229220	Promoter (<=1kb)	208
				TGME49_253140	Promoter (<=1kb)	123
				TGME49_214760	Promoter (1-2kb)	82
				TGME49_286730	Promoter (<=1kb)	518
				TGME49_226430	Promoter (<=1kb)	325
				TGME49_278420	Promoter (<=1kb)	179
				TGME49_255450	Promoter (<=1kb)	861
				TGME49_204500	Promoter (<=1kb)	197
				TGME49_215160	5' UTR	92
				TGME49_251850	Promoter (<=1kb)	246
				TGME49_221390	Promoter (<=1kb)	172
				TGME49_289990	Promoter (<=1kb)	399
				TGME49_235140	Promoter (<=1kb)	308
				TGME49_239480	Promoter (<=1kb)	95
				TGME49_210770	Promoter (<=1kb)	99
				TGME49_213635	3' UTR	119
				TGME49_279100	3' UTR	421
				TGME49_255175	Distal Intergenic	277
				TGME49_269775	Promoter (<=1kb)	236
				TGME49_319870	Promoter (1-2kb)	245
				TGME49_239440	Promoter (<=1kb)	149
				TGME49_205120	Promoter (<=1kb)	175
				TGME49_204080	Promoter (<=1kb)	464
				TGME49_258085	Promoter (1-2kb)	319
				TGME49_271970	Promoter (<=1kb)	454
				TGME49_270880	Promoter (<=1kb)	264
				TGME49_269340	Promoter (<=1kb)	262
				TGME49_230180	Promoter (<=1kb)	462
				TGME49_226250	Promoter (1-2kb)	228
				TGME49_313600	Promoter (<=1kb)	178
				TGME49_314430	Promoter (<=1kb)	238
				TGME49_316460	Promoter (<=1kb)	116
				TGME49_218510	Promoter (<=1kb)	84
				TGME49_251810	Promoter (<=1kb)	506
				TGME49_277050	Promoter (<=1kb)	208
				TGME49_275650	Promoter (<=1kb)	416
				TGME49_252480	Promoter (<=1kb)	188
				TGME49_226540	Promoter (<=1kb)	220
				TGME49_214960	Distal Intergenic	148
				TGME49_320180	Promoter (1-2kb)	208
				TGME49_238980	Promoter (<=1kb)	88
				TGME49_213710	Promoter (<=1kb)	460
				TGME49_244400	Promoter (<=1kb)	160
				TGME49_304870	Distal Intergenic	234
				TGME49_237894	Distal Intergenic	166
				TGME49_249935	Promoter (<=1kb)	150
				TGME49_240880	Promoter (1-2kb)	91
				TGME49_263000	Promoter (<=1kb)	166
				TGME49_295760	Promoter (1-2kb)	112
				TGME49_285425	Promoter (1-2kb)	545
				TGME49_220720	Distal Intergenic	188
				TGME49_231410	Promoter (<=1kb)	382
				TGME49_214920	Promoter (<=1kb)	198
				TGME49_224940	Promoter (<=1kb)	540
				TGME49_211150	Promoter (<=1kb)	380
				TGME49_319540	Promoter (<=1kb)	147
				TGME49_266270	Promoter (<=1kb)	180
				TGME49_267855	Promoter (<=1kb)	130
				TGME49_287500	Distal Intergenic	230
				TGME49_244715	Promoter (<=1kb)	301
				TGME49_203870	Promoter (<=1kb)	222
				TGME49_203540	Distal Intergenic	130
				TGME49_260400	Promoter (<=1kb)	615
				TGME49_273670	Promoter (<=1kb)	259
				TGME49_272710	Promoter (<=1kb)	735
				TGME49_229770	Promoter (<=1kb)	154
				TGME49_269620	Promoter (1-2kb)	110
				TGME49_224520	Promoter (<=1kb)	695
				TGME49_235340	Promoter (<=1kb)	162
				TGME49_215550	Promoter (<=1kb)	145
				TGME49_227820	Promoter (<=1kb)	200
				TGME49_312090	Promoter (<=1kb)	154
				TGME49_316230	Promoter (1-2kb)	128
				TGME49_216000	Promoter (<=1kb)	138
				TGME49_249880	Promoter (<=1kb)	395
				TGME49_250800	Promoter (<=1kb)	180
				TGME49_297245	Promoter (<=1kb)	72
				TGME49_222110	Promoter (<=1kb)	326
				TGME49_304870	Distal Intergenic	68
				TGME49_310220	Promoter (<=1kb)	641
				TGME49_242090	Promoter (<=1kb)	255
				TGME49_240060	3' UTR	145
				TGME49_278990	Promoter (<=1kb)	125
				TGME49_275370	Promoter (1-2kb)	355
				TGME49_262970	Promoter (<=1kb)	290
				TGME49_299060	Promoter (<=1kb)	196
				TGME49_219590	Promoter (<=1kb)	262
				TGME49_211260	Promoter (<=1kb)	227
				TGME49_270700	Promoter (1-2kb)	149
				TGME49_251440	Promoter (<=1kb)	102
				TGME49_310740	Promoter (<=1kb)	191
				TGME49_262540	Promoter (1-2kb)	271
				TGME49_216285	Promoter (<=1kb)	217
				TGME49_266090	Promoter (1-2kb)	666
				TGME49_295420	Promoter (<=1kb)	117
				TGME49_293650	Promoter (<=1kb)	462
				TGME49_209005	Promoter (1-2kb)	136
				TGME49_254480	Promoter (1-2kb)	192
				TGME49_292140	Promoter (<=1kb)	269
				TGME49_304870	Distal Intergenic	273
				TGME49_306000	Promoter (<=1kb)	352
				TGME49_212990	Promoter (<=1kb)	385
				TGME49_205130	Promoter (<=1kb)	508
				TGME49_204280	Promoter (<=1kb)	136
				TGME49_281910	Promoter (<=1kb)	243
				TGME49_261850	Promoter (1-2kb)	396
				TGME49_257080	Promoter (1-2kb)	776
				TGME49_233380	Promoter (<=1kb)	718
				TGME49_269232	Promoter (<=1kb)	198
				TGME49_225990	Promoter (<=1kb)	148
				TGME49_224950	Promoter (<=1kb)	592
				TGME49_310177	Promoter (1-2kb)	316
				TGME49_311100	Promoter (<=1kb)	730
				TGME49_315500	Promoter (<=1kb)	245
				TGME49_260490	Promoter (<=1kb)	211
				TGME49_311440	Promoter (<=1kb)	415
				TGME49_298020	Promoter (<=1kb)	556
				TGME49_233925	Promoter (<=1kb)	151
				TGME49_258180	Promoter (1-2kb)	121
				TGME49_200430	Promoter (<=1kb)	167
				TGME49_276930	Promoter (<=1kb)	571
				TGME49_240630	Promoter (<=1kb)	462
				TGME49_257090	Promoter (<=1kb)	239
				TGME49_232170	Promoter (<=1kb)	199
				TGME49_216010	Promoter (1-2kb)	182
				TGME49_278340	Promoter (<=1kb)	192
				TGME49_257330	Promoter (1-2kb)	538
				TGME49_317705	Distal Intergenic	308
				TGME49_296010	Promoter (<=1kb)	176
				TGME49_241170	Promoter (<=1kb)	189
				TGME49_294980	Promoter (<=1kb)	971
				TGME49_295620	Promoter (<=1kb)	294
				TGME49_209260	Promoter (<=1kb)	479
				TGME49_321520	Promoter (<=1kb)	308
				TGME49_221170	Promoter (<=1kb)	373
				TGME49_253900	Promoter (<=1kb)	325
				TGME49_276210	Promoter (<=1kb)	189
				TGME49_320005	Promoter (<=1kb)	127
				TGME49_288830	Promoter (<=1kb)	179
				TGME49_220350	Promoter (<=1kb)	112
				TGME49_213067	Promoter (<=1kb)	163
				TGME49_238480	Promoter (<=1kb)	224
				TGME49_202310	Promoter (<=1kb)	134
				TGME49_257580	Promoter (1-2kb)	451
				TGME49_232190	Promoter (<=1kb)	64
				TGME49_214900	Promoter (<=1kb)	184
				TGME49_316090	Promoter (<=1kb)	119
				TGME49_316900	Distal Intergenic	310
				TGME49_277560	Promoter (<=1kb)	186
				TGME49_271050	Promoter (<=1kb)	342
				TGME49_219270	Promoter (<=1kb)	146
				TGME49_207820	Promoter (<=1kb)	81
				TGME49_249702	Promoter (<=1kb)	163
				TGME49_218830	Promoter (<=1kb)	193
				TGME49_249390	Promoter (<=1kb)	395
				TGME49_309560	Promoter (<=1kb)	367
				TGME49_239310	Promoter (<=1kb)	98
				TGME49_218300	Promoter (<=1kb)	188
				TGME49_309840	Promoter (1-2kb)	246
				TGME49_241140	Promoter (1-2kb)	204
				TGME49_219710	Promoter (<=1kb)	137
				TGME49_306350	Promoter (<=1kb)	177
				TGME49_223150	Distal Intergenic	186
				TGME49_278780	Promoter (<=1kb)	154
				TGME49_281530	3' UTR	212
				TGME49_228350	Promoter (1-2kb)	205
				TGME49_214290	Promoter (<=1kb)	82
				TGME49_218950	Promoter (<=1kb)	170
				TGME49_236950	Promoter (<=1kb)	271
				TGME49_294870	Promoter (<=1kb)	235
				TGME49_209240	Promoter (<=1kb)	716
				TGME49_297900	Promoter (<=1kb)	176
				TGME49_252255	Distal Intergenic	138
				TGME49_291960	Promoter (<=1kb)	178
				TGME49_266950	Promoter (<=1kb)	159
				TGME49_213940	Promoter (<=1kb)	290
				TGME49_283870	Distal Intergenic	640
				TGME49_239700	Promoter (<=1kb)	162
				TGME49_205700	Promoter (<=1kb)	38
				TGME49_205650	Promoter (1-2kb)	405
				TGME49_204130	Promoter (1-2kb)	253
				TGME49_203240	Promoter (<=1kb)	165
				TGME49_257580	Promoter (<=1kb)	126
				TGME49_256840	Promoter (<=1kb)	120
				TGME49_273640	Promoter (<=1kb)	711
				TGME49_270805	Promoter (<=1kb)	161
				TGME49_268230	Promoter (<=1kb)	144
				TGME49_214410	Promoter (<=1kb)	782
				TGME49_214835	Promoter (<=1kb)	757
				TGME49_227630	Promoter (<=1kb)	933
				TGME49_313900	Promoter (<=1kb)	91
				TGME49_219270	Promoter (<=1kb)	226
				TGME49_217910	Promoter (<=1kb)	224
				TGME49_246170	5' UTR	117
				TGME49_247520	Promoter (<=1kb)	324
				TGME49_219540	Promoter (<=1kb)	254
				TGME49_267100	Promoter (<=1kb)	217
				TGME49_290960	Promoter (<=1kb)	191
				TGME49_206350	Promoter (<=1kb)	197
				TGME49_268210	Distal Intergenic	161
				TGME49_253800	Promoter (<=1kb)	651
				TGME49_243600	Promoter (<=1kb)	616
				TGME49_217555	Promoter (<=1kb)	200
				TGME49_222188	Promoter (<=1kb)	360
				TGME49_239795	Promoter (1-2kb)	100
				TGME49_223610	Promoter (1-2kb)	513
				TGME49_209040	3' UTR	272
				TGME49_226990	Promoter (1-2kb)	121
				TGME49_240450	Promoter (<=1kb)	347
				TGME49_241850	Promoter (1-2kb)	540
				TGME49_276200	Promoter (1-2kb)	130
				TGME49_287240	Promoter (<=1kb)	145
				TGME49_315210	Promoter (1-2kb)	247
				TGME49_259960	Distal Intergenic	101
				TGME49_202190	Promoter (<=1kb)	297
				TGME49_305200	Promoter (<=1kb)	197
				TGME49_213760	Promoter (<=1kb)	67
				TGME49_252190	Promoter (<=1kb)	225
				TGME49_221590	Promoter (<=1kb)	176
				TGME49_212230	Promoter (1-2kb)	243
				TGME49_304920	Promoter (<=1kb)	107
				TGME49_293810	Promoter (<=1kb)	286
				TGME49_320105	Promoter (<=1kb)	292
				TGME49_294730	Promoter (<=1kb)	265
				TGME49_295590	Promoter (<=1kb)	112
				TGME49_208910	Promoter (<=1kb)	153
				TGME49_317705	Distal Intergenic	522
				TGME49_289290	Promoter (<=1kb)	214
				TGME49_290682	3' UTR	69
				TGME49_306560	Promoter (<=1kb)	213
				TGME49_238390	Promoter (<=1kb)	217
				TGME49_260620	Promoter (<=1kb)	169
				TGME49_258770	Promoter (1-2kb)	100
				TGME49_257090	Promoter (<=1kb)	286
				TGME49_230880	Promoter (<=1kb)	128
				TGME49_231960	Promoter (<=1kb)	135
				TGME49_232030	Promoter (<=1kb)	408
				TGME49_232260	Promoter (<=1kb)	197
				TGME49_200290	Promoter (<=1kb)	209
				TGME49_227050	3' UTR	455
				TGME49_224490	Promoter (<=1kb)	161
				TGME49_223970	Promoter (<=1kb)	193
				TGME49_235380	Promoter (<=1kb)	728
				TGME49_227810	Promoter (<=1kb)	225
				TGME49_310700	Promoter (<=1kb)	132
				TGME49_313900	Distal Intergenic	147
				TGME49_316900	Distal Intergenic	111
				TGME49_301415	Promoter (1-2kb)	170
				TGME49_317705	Distal Intergenic	146
				TGME49_274160	Promoter (<=1kb)	604
				TGME49_311480	Promoter (<=1kb)	94
				TGME49_320610	Promoter (<=1kb)	179
				TGME49_269175	Promoter (1-2kb)	181
				TGME49_289790	Promoter (<=1kb)	432
				TGME49_235380	Promoter (1-2kb)	156
				TGME49_300052	Promoter (1-2kb)	66
				TGME49_256035	Promoter (<=1kb)	119
				TGME49_225320	Promoter (<=1kb)	200
				TGME49_258520	Promoter (<=1kb)	178
				TGME49_259950	Distal Intergenic	110
				TGME49_219580	Promoter (<=1kb)	41
				TGME49_234470	Promoter (<=1kb)	182
				TGME49_231070	Promoter (1-2kb)	148
				TGME49_230510	Promoter (<=1kb)	131
				TGME49_263460	Promoter (<=1kb)	242
				TGME49_203815	Promoter (<=1kb)	131
				TGME49_243620	Promoter (<=1kb)	193
				TGME49_320110	Promoter (<=1kb)	294
				TGME49_238470	Promoter (1-2kb)	155
				TGME49_236790	Promoter (1-2kb)	103
				TGME49_209730	Promoter (<=1kb)	148
				TGME49_318275	Promoter (<=1kb)	122
				TGME49_254740	Promoter (1-2kb)	263
				TGME49_297900	Promoter (<=1kb)	126
				TGME49_304480	Promoter (<=1kb)	148
				TGME49_217570	Promoter (<=1kb)	436
				TGME49_271888	Promoter (<=1kb)	483
				TGME49_213392	Promoter (<=1kb)	198
				TGME49_201520	Promoter (1-2kb)	109
				TGME49_264030	Promoter (<=1kb)	263
				TGME49_265020	Promoter (1-2kb)	53
				TGME49_227800	Promoter (1-2kb)	288
				TGME49_270975	Distal Intergenic	229
				TGME49_243655	Promoter (<=1kb)	53
				TGME49_239420	Promoter (<=1kb)	197
				TGME49_312950	Promoter (<=1kb)	166
				TGME49_210600	Promoter (<=1kb)	173
				TGME49_202290	Promoter (<=1kb)	337
				TGME49_225315	Promoter (<=1kb)	176
				TGME49_293650	Distal Intergenic	150
				TGME49_294050	Promoter (<=1kb)	200
				TGME49_297650	Promoter (1-2kb)	198
				TGME49_297760	Promoter (<=1kb)	134
				TGME49_319350	Promoter (<=1kb)	533
				TGME49_290310	Promoter (<=1kb)	542
				TGME49_306670	Promoter (<=1kb)	261
				TGME49_257340	Promoter (1-2kb)	178
				TGME49_256770	Promoter (1-2kb)	118
				TGME49_270380	Promoter (<=1kb)	168
				TGME49_269050	Promoter (<=1kb)	98
				TGME49_212090	Promoter (<=1kb)	186
				TGME49_235315	Promoter (<=1kb)	207
				TGME49_237195	Promoter (1-2kb)	134
				TGME49_214420	Promoter (<=1kb)	419
				TGME49_214783	Promoter (<=1kb)	119
				TGME49_310440	Promoter (<=1kb)	658
				TGME49_314110	Promoter (<=1kb)	692
				TGME49_247380	Promoter (<=1kb)	388
				TGME49_248480	Promoter (<=1kb)	659
				TGME49_248580	Promoter (<=1kb)	159
				TGME49_250860	Promoter (<=1kb)	109
				TGME49_310750	Promoter (1-2kb)	236
				TGME49_208560	Promoter (<=1kb)	192
				TGME49_254860	Distal Intergenic	472
				TGME49_240490	Promoter (<=1kb)	334
				TGME49_261080	Promoter (<=1kb)	394
				TGME49_232300	Promoter (<=1kb)	126
				TGME49_295770	Promoter (<=1kb)	109
				TGME49_260830	Distal Intergenic	422
				TGME49_263070	Promoter (<=1kb)	212
				TGME49_251410	Promoter (<=1kb)	348
				TGME49_289620	Promoter (<=1kb)	452
				TGME49_308980	Promoter (<=1kb)	208
				TGME49_233230	Promoter (1-2kb)	133
				TGME49_250870	Promoter (<=1kb)	84
				TGME49_275690	Promoter (<=1kb)	370
				TGME49_227015	Promoter (<=1kb)	461
				TGME49_239050	Promoter (<=1kb)	231
				TGME49_288000	Promoter (<=1kb)	250
				TGME49_239550	Promoter (1-2kb)	209
				TGME49_293470	Promoter (<=1kb)	434
				TGME49_249030	Promoter (1-2kb)	257
				TGME49_202490	Promoter (<=1kb)	89
				TGME49_293060	Promoter (<=1kb)	393
				TGME49_229380	Promoter (<=1kb)	216
				TGME49_220440	Promoter (<=1kb)	354
				TGME49_289370	Promoter (1-2kb)	61
				TGME49_277250	Promoter (<=1kb)	78
				TGME49_218220	Distal Intergenic	216
				TGME49_248750	Promoter (<=1kb)	174
				TGME49_234230	3' UTR	110
				TGME49_277090	Promoter (<=1kb)	184
				TGME49_321500	Promoter (<=1kb)	471
				TGME49_252255	Promoter (<=1kb)	182
				TGME49_318400	Promoter (1-2kb)	556
				TGME49_213940	Promoter (<=1kb)	86
				TGME49_286250	5' UTR	101
				TGME49_243170	Promoter (<=1kb)	283
				TGME49_204290	Promoter (<=1kb)	139
				TGME49_203150	3' UTR	286
				TGME49_202568	Distal Intergenic	69
				TGME49_271050	Promoter (<=1kb)	402
				TGME49_226960	Promoter (<=1kb)	576
				TGME49_237510	Promoter (<=1kb)	388
				TGME49_214800	Promoter (<=1kb)	118
				TGME49_207030	Promoter (<=1kb)	249
				TGME49_307030	Promoter (<=1kb)	228
				TGME49_311040	Promoter (<=1kb)	206
				TGME49_313010	Promoter (<=1kb)	246
				TGME49_247025	Promoter (<=1kb)	368
				TGME49_278882	Promoter (1-2kb)	35
				TGME49_202530	Promoter (<=1kb)	67
				TGME49_249160	Downstream (<=300bp)	301
				TGME49_307020	Promoter (<=1kb)	187
				TGME49_210440	Promoter (1-2kb)	314
				TGME49_243950	Downstream (<=300bp)	188
				TGME49_214440	Promoter (1-2kb)	208
				TGME49_321490	Promoter (<=1kb)	109
				TGME49_268610	Promoter (1-2kb)	108
				TGME49_275770	Promoter (1-2kb)	280
				TGME49_278205	Promoter (<=1kb)	591
				TGME49_244530	Promoter (<=1kb)	232
				TGME49_246750	Promoter (<=1kb)	133
				TGME49_294860	Promoter (<=1kb)	136
				TGME49_252200	Promoter (<=1kb)	110
				TGME49_290940	Promoter (<=1kb)	575
				TGME49_257550	Promoter (1-2kb)	185
				TGME49_224310	Promoter (<=1kb)	189
				TGME49_297110	Promoter (<=1kb)	149
				TGME49_277820	Promoter (<=1kb)	482
				TGME49_223258	Promoter (1-2kb)	102
				TGME49_258240	Promoter (<=1kb)	148
				TGME49_230605	Distal Intergenic	270
				TGME49_280460	3' UTR	274
				TGME49_224932	Promoter (<=1kb)	729
				TGME49_217370	Promoter (1-2kb)	458
				TGME49_220850	Promoter (<=1kb)	159
				TGME49_251840	Promoter (1-2kb)	321
				TGME49_221240	Promoter (<=1kb)	401
				TGME49_229640	Promoter (1-2kb)	79
				TGME49_278050	Promoter (<=1kb)	224
				TGME49_278240	Promoter (1-2kb)	514
				TGME49_295650	Promoter (<=1kb)	195
				TGME49_208550	3' UTR	163
				TGME49_275820	Promoter (<=1kb)	773
				TGME49_252250	Promoter (<=1kb)	167
				TGME49_301270	Promoter (1-2kb)	409
				TGME49_319500	Promoter (<=1kb)	175
				TGME49_274290	Distal Intergenic	109
				TGME49_210420	Promoter (<=1kb)	223
				TGME49_267140	Promoter (1-2kb)	266
				TGME49_285895	Promoter (1-2kb)	199
				TGME49_243430	Promoter (1-2kb)	349
				TGME49_205670	Promoter (<=1kb)	543
				TGME49_205670	Promoter (<=1kb)	316
				TGME49_204520	Promoter (<=1kb)	240
				TGME49_261780	Promoter (<=1kb)	447
				TGME49_259030	Distal Intergenic	92
				TGME49_231640	Promoter (1-2kb)	60
				TGME49_233020	Promoter (<=1kb)	242
				TGME49_273970	Promoter (<=1kb)	115
				TGME49_227080	Promoter (<=1kb)	177
				TGME49_225870	Promoter (<=1kb)	287
				TGME49_225000	Promoter (<=1kb)	413
				TGME49_228230	Promoter (1-2kb)	538
				TGME49_237080	Promoter (1-2kb)	349
				TGME49_227615	Promoter (<=1kb)	302
				TGME49_312100	Promoter (<=1kb)	127
				TGME49_215955	Promoter (1-2kb)	108
				TGME49_309405	Promoter (<=1kb)	162
				TGME49_300270	Promoter (1-2kb)	424
				TGME49_218530	Promoter (<=1kb)	513
				TGME49_247420	Promoter (<=1kb)	122
				TGME49_247700	Promoter (1-2kb)	111
				TGME49_205420	Promoter (<=1kb)	51
				TGME49_321300	Promoter (<=1kb)	216
				TGME49_239290	Promoter (1-2kb)	173
				TGME49_253060	Promoter (<=1kb)	315
				TGME49_305635	Promoter (1-2kb)	201
				TGME49_239830	Promoter (<=1kb)	131
				TGME49_265205	Promoter (<=1kb)	335
				TGME49_215890	3' UTR	64
				TGME49_316900	Distal Intergenic	223
				TGME49_301240	Promoter (<=1kb)	464
				TGME49_259940	Promoter (<=1kb)	183
				TGME49_219310	Promoter (<=1kb)	113
				TGME49_253400	Promoter (<=1kb)	314
				TGME49_219190	Promoter (<=1kb)	93
				TGME49_207780	Promoter (<=1kb)	512
				TGME49_297090	Promoter (1-2kb)	24
				TGME49_204280	Promoter (<=1kb)	571
				TGME49_210420	Promoter (<=1kb)	160
				TGME49_204340	Promoter (<=1kb)	139
				TGME49_320630	Promoter (<=1kb)	73
				TGME49_204050	Promoter (<=1kb)	406
				TGME49_220290	Promoter (<=1kb)	264
				TGME49_214140	Promoter (<=1kb)	47
				TGME49_301370	Promoter (<=1kb)	110
				TGME49_234470	5' UTR	108
				TGME49_232600	Promoter (<=1kb)	263
				TGME49_231850	Promoter (<=1kb)	196
				TGME49_293510	3' UTR	411
				TGME49_282230	Distal Intergenic	199
				TGME49_253510	Promoter (<=1kb)	119
				TGME49_232030	Promoter (1-2kb)	65
				TGME49_253470	Promoter (<=1kb)	32
				TGME49_203780	Promoter (<=1kb)	354
				TGME49_314500	Promoter (1-2kb)	262
				TGME49_268182	Promoter (1-2kb)	120
				TGME49_214360	Promoter (<=1kb)	566
				TGME49_248700	Promoter (<=1kb)	437
				TGME49_250920	Promoter (<=1kb)	99
				TGME49_217520	Promoter (1-2kb)	70
				TGME49_295935	Promoter (<=1kb)	171
				TGME49_209250	Promoter (<=1kb)	144
				TGME49_207770	Distal Intergenic	153
				TGME49_252870	Promoter (<=1kb)	319
				TGME49_210970	Promoter (<=1kb)	308
				TGME49_289380	Promoter (<=1kb)	235
				TGME49_289745	Promoter (<=1kb)	267
				TGME49_306060	Promoter (<=1kb)	287
				TGME49_306400	Promoter (<=1kb)	64
				TGME49_287270	Distal Intergenic	668
				TGME49_240370	Promoter (1-2kb)	290
				TGME49_238010	Distal Intergenic	90
				TGME49_239855	Promoter (1-2kb)	291
				TGME49_256770	Promoter (<=1kb)	73
				TGME49_255230	Promoter (<=1kb)	275
				TGME49_231350	Promoter (1-2kb)	81
				TGME49_268240	Promoter (<=1kb)	229
				TGME49_230705	Promoter (<=1kb)	27
				TGME49_224320	Promoter (<=1kb)	408
				TGME49_237460	Promoter (<=1kb)	127
				TGME49_314260	Promoter (<=1kb)	173
				TGME49_216180	Promoter (<=1kb)	120
				TGME49_215900	Promoter (<=1kb)	153
				TGME49_300220	Promoter (<=1kb)	476
				TGME49_217620	Promoter (<=1kb)	126
				TGME49_278770	Promoter (<=1kb)	41
				TGME49_219485	Promoter (<=1kb)	106
				TGME49_253755	Promoter (<=1kb)	51
				TGME49_310010	Promoter (<=1kb)	216
				TGME49_245460	Promoter (<=1kb)	574
				TGME49_207780	Promoter (<=1kb)	510
				TGME49_225150	3' UTR	276
				TGME49_287170	3' UTR	266
				TGME49_201740	Promoter (1-2kb)	150
				TGME49_215890	Promoter (<=1kb)	154
				TGME49_223140	Distal Intergenic	380
				TGME49_280740	Promoter (<=1kb)	149
				TGME49_262950	Promoter (<=1kb)	104
				TGME49_288570	3' UTR	312
				TGME49_320090	3' UTR	106
				TGME49_257990	Promoter (<=1kb)	256
				TGME49_316600	Promoter (<=1kb)	342
				TGME49_236030	Promoter (1-2kb)	32
				TGME49_253360	Promoter (<=1kb)	138
				TGME49_295610	Promoter (<=1kb)	771
				TGME49_244090	Promoter (<=1kb)	76
				TGME49_261440	Promoter (1-2kb)	59
				TGME49_213460	Promoter (1-2kb)	142
				TGME49_215160	Promoter (1-2kb)	141
				TGME49_293570	Promoter (<=1kb)	263
				TGME49_271320	Promoter (<=1kb)	143
				TGME49_278090	Promoter (<=1kb)	237
				TGME49_224905	Promoter (<=1kb)	75
				TGME49_265110	Promoter (<=1kb)	225
				TGME49_315370	Promoter (<=1kb)	544
				TGME49_270610	Promoter (<=1kb)	575
				TGME49_289950	Promoter (<=1kb)	55
				TGME49_202010	Promoter (1-2kb)	53
				TGME49_294970	Promoter (<=1kb)	190
				TGME49_265070	Promoter (<=1kb)	121
				TGME49_312980	Distal Intergenic	108
				TGME49_213620	Promoter (<=1kb)	175
				TGME49_225102	Promoter (<=1kb)	130
				TGME49_207170	Promoter (<=1kb)	17
				TGME49_223040	Promoter (<=1kb)	764
				TGME49_310500	Promoter (<=1kb)	323
				TGME49_295080	Promoter (<=1kb)	152
				TGME49_234540	Promoter (<=1kb)	253
				TGME49_238250	Promoter (<=1kb)	131
				TGME49_275310	Promoter (<=1kb)	177
				TGME49_207480	Promoter (1-2kb)	370
				TGME49_249570	Promoter (<=1kb)	174
				TGME49_224740	Promoter (1-2kb)	250
				TGME49_295935	Promoter (<=1kb)	118
				TGME49_293730	Promoter (<=1kb)	98
				TGME49_221200	Promoter (<=1kb)	509
				TGME49_297880	Promoter (<=1kb)	325
				TGME49_220930	Promoter (<=1kb)	455
				TGME49_289770	Promoter (<=1kb)	370
				TGME49_292170	Promoter (<=1kb)	293
				TGME49_305630	Promoter (<=1kb)	182
				TGME49_220100	Promoter (<=1kb)	271
				TGME49_286090	3' UTR	127
				TGME49_241820	5' UTR	540
				TGME49_242580	Distal Intergenic	154
				TGME49_243460	Promoter (1-2kb)	180
				TGME49_203980	Promoter (1-2kb)	130
				TGME49_280410	Promoter (<=1kb)	345
				TGME49_282070	Promoter (<=1kb)	157
				TGME49_282220	Promoter (<=1kb)	147
				TGME49_206640	Promoter (<=1kb)	721
				TGME49_261970	Promoter (<=1kb)	425
				TGME49_261230	Distal Intergenic	111
				TGME49_229320	Promoter (<=1kb)	180
				TGME49_232340	Promoter (<=1kb)	573
				TGME49_232360	Promoter (1-2kb)	216
				TGME49_233480	Promoter (<=1kb)	605
				TGME49_270180	Promoter (<=1kb)	367
				TGME49_269900	Promoter (1-2kb)	251
				TGME49_224960	Promoter (<=1kb)	104
				TGME49_311765	Promoter (<=1kb)	225
				TGME49_312300	Promoter (<=1kb)	510
				TGME49_312300	Promoter (<=1kb)	44
				TGME49_309025	Distal Intergenic	242
				TGME49_218960	Promoter (<=1kb)	364
				TGME49_246770	Promoter (1-2kb)	216
				TGME49_277500	Promoter (<=1kb)	149
				TGME49_272010	Promoter (<=1kb)	126
				TGME49_222230	Promoter (<=1kb)	358
				TGME49_307480	Distal Intergenic	62
				TGME49_200385	Distal Intergenic	40
				TGME49_278130	Promoter (<=1kb)	210
				TGME49_242415	Promoter (<=1kb)	232
				TGME49_235187	Distal Intergenic	217
				TGME49_214190	Promoter (<=1kb)	406
				TGME49_242590	Promoter (1-2kb)	284
				TGME49_259660	3' UTR	165
				TGME49_243545	Promoter (<=1kb)	1178
				TGME49_226620	Promoter (<=1kb)	139
				TGME49_308945	Promoter (<=1kb)	121
				TGME49_214530	Promoter (<=1kb)	270
				TGME49_247520	Promoter (<=1kb)	794
				TGME49_215520	Promoter (<=1kb)	307
				TGME49_218220	Distal Intergenic	67
				TGME49_210408	3' UTR	561
				TGME49_215425	Promoter (1-2kb)	204
				TGME49_304470	Promoter (<=1kb)	249
				TGME49_298630	Promoter (1-2kb)	186
				TGME49_306350	Promoter (<=1kb)	288
				TGME49_239270	Promoter (<=1kb)	52
				TGME49_239800	Promoter (<=1kb)	475
				TGME49_224240	Promoter (1-2kb)	91
				TGME49_230610	Distal Intergenic	50
				TGME49_250220	Distal Intergenic	423
				TGME49_226900	Promoter (1-2kb)	88
				TGME49_315230	Promoter (<=1kb)	91
				TGME49_289940	Promoter (<=1kb)	281
				TGME49_290600	Promoter (<=1kb)	303
				TGME49_278360	Promoter (<=1kb)	93
				TGME49_231190	Promoter (<=1kb)	92
				TGME49_216460	Promoter (<=1kb)	637
				TGME49_225140	Promoter (1-2kb)	221
				TGME49_208020	5' UTR	174
				TGME49_210690	Promoter (1-2kb)	62
				TGME49_254870	Promoter (1-2kb)	69
				TGME49_286080	Promoter (<=1kb)	149
				TGME49_201130	Promoter (<=1kb)	198
				TGME49_277490	Promoter (1-2kb)	309
				TGME49_208490	Promoter (<=1kb)	315
				TGME49_243570	Promoter (<=1kb)	26
				TGME49_241150	Promoter (<=1kb)	93
				TGME49_239120	Promoter (1-2kb)	39
				TGME49_268210	Promoter (<=1kb)	33
				TGME49_276230	Promoter (<=1kb)	540
				TGME49_293430	Promoter (<=1kb)	168
				TGME49_293880	Promoter (<=1kb)	404
				TGME49_321270	Distal Intergenic	228
				TGME49_221275	Promoter (<=1kb)	123
				TGME49_254070	Promoter (1-2kb)	176
				TGME49_254625	Promoter (<=1kb)	338
				TGME49_305340	Promoter (<=1kb)	214
				TGME49_285920	Promoter (1-2kb)	476
				TGME49_242770	Promoter (<=1kb)	376
				TGME49_243440	Promoter (1-2kb)	215
				TGME49_238950	Promoter (<=1kb)	300
				TGME49_205170	Promoter (<=1kb)	858
				TGME49_203310	Promoter (<=1kb)	205
				TGME49_202070	Promoter (<=1kb)	212
				TGME49_258410	Promoter (<=1kb)	379
				TGME49_230940	Promoter (<=1kb)	191
				TGME49_231970	Promoter (<=1kb)	317
				TGME49_232250	Promoter (<=1kb)	355
				TGME49_268830	Promoter (<=1kb)	336
				TGME49_268430	Promoter (<=1kb)	133
				TGME49_268310	Promoter (<=1kb)	157
				TGME49_226110	Promoter (<=1kb)	217
				TGME49_225530	Promoter (<=1kb)	54
				TGME49_223610	Promoter (<=1kb)	96
				TGME49_214630	Promoter (<=1kb)	580
				TGME49_214930	Promoter (<=1kb)	176
				TGME49_227948	Promoter (<=1kb)	108
				TGME49_313040	Promoter (<=1kb)	253
				TGME49_300000	Promoter (<=1kb)	309
				TGME49_247350	Promoter (1-2kb)	86
				TGME49_247350	Promoter (<=1kb)	407
				TGME49_249380	Promoter (<=1kb)	297
				TGME49_250220	Promoter (<=1kb)	319
				TGME49_219820	Promoter (1-2kb)	253
				TGME49_267660	Promoter (1-2kb)	122
				TGME49_267440	Promoter (<=1kb)	108
				TGME49_220630	Promoter (1-2kb)	104
				TGME49_270350	Promoter (<=1kb)	276
				TGME49_266920	Promoter (1-2kb)	218
				TGME49_306342	Promoter (1-2kb)	318
				TGME49_268970	Promoter (<=1kb)	936
				TGME49_259570	Promoter (<=1kb)	58
				TGME49_315630	Promoter (1-2kb)	215
				TGME49_203600	Promoter (1-2kb)	199
				TGME49_202620	Promoter (1-2kb)	226
				TGME49_257760	Promoter (<=1kb)	391
				TGME49_280660	Promoter (<=1kb)	118
				TGME49_277940	Promoter (<=1kb)	91
				TGME49_270310	Promoter (<=1kb)	360
				TGME49_244406	Promoter (<=1kb)	143
				TGME49_305130	Promoter (<=1kb)	370
				TGME49_247350	Promoter (<=1kb)	418
				TGME49_227640	Promoter (<=1kb)	48
				TGME49_211650	Promoter (<=1kb)	87
				TGME49_313680	Promoter (<=1kb)	81
				TGME49_294850	Promoter (1-2kb)	147
				TGME49_219650	Promoter (<=1kb)	173
				TGME49_311510	Promoter (<=1kb)	145
				TGME49_305190	Promoter (1-2kb)	157
				TGME49_264660	Promoter (1-2kb)	74
				TGME49_203740	Promoter (<=1kb)	285
				TGME49_251855	Promoter (<=1kb)	37
				TGME49_231170	Promoter (<=1kb)	6
				TGME49_294270	Promoter (1-2kb)	200
				TGME49_219690	Promoter (<=1kb)	342
				TGME49_280770	Promoter (<=1kb)	80
				TGME49_311480	Promoter (1-2kb)	38
				TGME49_216590	Promoter (<=1kb)	407
				TGME49_285210	Distal Intergenic	406
				TGME49_278080	Promoter (<=1kb)	337
				TGME49_281430	Promoter (<=1kb)	205
				TGME49_211630	Promoter (<=1kb)	301
				TGME49_289770	Promoter (1-2kb)	102
				TGME49_238480	Promoter (1-2kb)	97
				TGME49_200385	Promoter (1-2kb)	145
				TGME49_217680	Distal Intergenic	105
				TGME49_240780	Promoter (<=1kb)	171
				TGME49_313390	Promoter (<=1kb)	70
				TGME49_262933	Promoter (<=1kb)	273
				TGME49_313710	Promoter (<=1kb)	40
				TGME49_242580	Promoter (<=1kb)	442
				TGME49_294740	Promoter (<=1kb)	363
				TGME49_293360	Promoter (<=1kb)	423
				TGME49_207440	Promoter (<=1kb)	216
				TGME49_276140	Promoter (<=1kb)	66
				TGME49_319900	Promoter (<=1kb)	420
				TGME49_265470	Promoter (<=1kb)	160
				TGME49_265320	Promoter (<=1kb)	65
				TGME49_288370	Promoter (<=1kb)	344
				TGME49_291140	Promoter (<=1kb)	238
				TGME49_286190	Promoter (<=1kb)	170
				TGME49_244640	Promoter (<=1kb)	280
				TGME49_205470	Promoter (<=1kb)	298
				TGME49_206670	Promoter (<=1kb)	296
				TGME49_232160	Promoter (<=1kb)	154
				TGME49_233450	Promoter (1-2kb)	305
				TGME49_233920	Promoter (1-2kb)	168
				TGME49_273670	Promoter (1-2kb)	91
				TGME49_271990	Promoter (<=1kb)	119
				TGME49_230000	Promoter (<=1kb)	216
				TGME49_200240	Promoter (<=1kb)	23
				TGME49_226800	Promoter (<=1kb)	259
				TGME49_228780	Promoter (1-2kb)	288
				TGME49_225080	Promoter (<=1kb)	270
				TGME49_223985	Promoter (1-2kb)	436
				TGME49_236870	Promoter (1-2kb)	197
				TGME49_214430	Promoter (<=1kb)	303
				TGME49_310235	Promoter (<=1kb)	241
				TGME49_307020	Promoter (<=1kb)	47
				TGME49_313550	Promoter (<=1kb)	164
				TGME49_216055	Promoter (<=1kb)	256
				TGME49_219240	Promoter (<=1kb)	239
				TGME49_218550	Promoter (1-2kb)	272
				TGME49_246940	Promoter (1-2kb)	73
				TGME49_249720	Promoter (<=1kb)	244
				TGME49_278030	Promoter (<=1kb)	70
				TGME49_248690	Promoter (<=1kb)	309
				TGME49_205350	5' UTR	452
				TGME49_293840	Promoter (1-2kb)	406
				TGME49_238480	Promoter (<=1kb)	193
				TGME49_308020	Promoter (1-2kb)	151
				TGME49_248680	Promoter (<=1kb)	117
				TGME49_275660	Promoter (<=1kb)	322
				TGME49_269000	3' UTR	122
				TGME49_312050	Promoter (<=1kb)	161
				TGME49_313790	Promoter (<=1kb)	305
				TGME49_203730	Promoter (<=1kb)	220
				TGME49_313930	Promoter (<=1kb)	242
				TGME49_293890	Promoter (<=1kb)	247
				TGME49_224030	Promoter (<=1kb)	179
				TGME49_244470	Promoter (1-2kb)	424
				TGME49_203970	Promoter (<=1kb)	78
				TGME49_264070	Promoter (<=1kb)	420
				TGME49_206620	Promoter (<=1kb)	245
				TGME49_205690	Promoter (<=1kb)	274
				TGME49_310770	Promoter (<=1kb)	84
				TGME49_279540	Distal Intergenic	26
				TGME49_229170	Distal Intergenic	68
				TGME49_217610	Promoter (1-2kb)	380
				TGME49_310040	Promoter (<=1kb)	465
				TGME49_277820	Promoter (<=1kb)	300
				TGME49_238420	Distal Intergenic	77
				TGME49_243720	Promoter (<=1kb)	142
				TGME49_204055	Promoter (<=1kb)	580
				TGME49_273850	Promoter (<=1kb)	214
				TGME49_308970	Promoter (<=1kb)	355
				TGME49_316130	Promoter (1-2kb)	181
				TGME49_248320	Promoter (<=1kb)	215
				TGME49_306600	Promoter (<=1kb)	104
				TGME49_223262	Promoter (1-2kb)	85
				TGME49_301170	Distal Intergenic	55
				TGME49_261075	Promoter (<=1kb)	497
				TGME49_238220	Promoter (1-2kb)	252
				TGME49_278350	Promoter (<=1kb)	149
				TGME49_258575	Promoter (<=1kb)	50
				TGME49_244670	Promoter (<=1kb)	223
				TGME49_214280	Promoter (<=1kb)	102
				TGME49_262710	Promoter (<=1kb)	181
				TGME49_234230	Promoter (<=1kb)	616
				TGME49_213460	Distal Intergenic	129
				TGME49_222070	Promoter (<=1kb)	121
				TGME49_217460	Promoter (<=1kb)	449
				TGME49_266890	Promoter (<=1kb)	844
				TGME49_233210	3' UTR	388
				TGME49_320100	Promoter (<=1kb)	270
				TGME49_212725	Promoter (<=1kb)	210
				TGME49_295935	5' UTR	250
				TGME49_295920	Promoter (<=1kb)	144
				TGME49_209190	Promoter (<=1kb)	249
				TGME49_321270	Distal Intergenic	177
				TGME49_207930	Promoter (<=1kb)	374
				TGME49_297870	Promoter (<=1kb)	255
				TGME49_252250	Distal Intergenic	388
				TGME49_211640	Promoter (<=1kb)	372
				TGME49_210682	Promoter (<=1kb)	288
				TGME49_320100	Promoter (1-2kb)	119
				TGME49_320080	Promoter (1-2kb)	235
				TGME49_289040	Distal Intergenic	88
				TGME49_266890	Promoter (<=1kb)	428
				TGME49_286570	Promoter (<=1kb)	60
				TGME49_286485	Promoter (<=1kb)	62
				TGME49_285520	Promoter (<=1kb)	312
				TGME49_240080	Promoter (1-2kb)	307
				TGME49_240365	Promoter (<=1kb)	63
				TGME49_240960	Promoter (<=1kb)	388
				TGME49_238380	Promoter (1-2kb)	275
				TGME49_241890	Promoter (<=1kb)	232
				TGME49_239760	Promoter (<=1kb)	152
				TGME49_206580	Promoter (1-2kb)	134
				TGME49_259290	Distal Intergenic	73
				TGME49_263710	Promoter (<=1kb)	476
				TGME49_263520	Promoter (<=1kb)	237
				TGME49_230940	Promoter (1-2kb)	350
				TGME49_233153	Promoter (1-2kb)	167
				TGME49_233157	Promoter (<=1kb)	47
				TGME49_229720	Promoter (<=1kb)	104
				TGME49_271985	Promoter (<=1kb)	218
				TGME49_271935	Promoter (<=1kb)	583
				TGME49_271375	Promoter (<=1kb)	114
				TGME49_269630	Distal Intergenic	44
				TGME49_268360	Promoter (1-2kb)	290
				TGME49_226330	Promoter (<=1kb)	381
				TGME49_225290	Promoter (<=1kb)	304
				TGME49_225230	Promoter (<=1kb)	61
				TGME49_224470	Promoter (<=1kb)	91
				TGME49_224350	Promoter (1-2kb)	264
				TGME49_224275	Promoter (<=1kb)	144
				TGME49_235690	Promoter (<=1kb)	48
				TGME49_227630	Promoter (<=1kb)	203
				TGME49_311150	Promoter (<=1kb)	187
				TGME49_313910	Promoter (<=1kb)	191
				TGME49_309195	Promoter (<=1kb)	358
				TGME49_309760	Promoter (<=1kb)	301
				TGME49_309960	Promoter (<=1kb)	137
				TGME49_246080	Promoter (<=1kb)	212
				TGME49_246490	Promoter (<=1kb)	549
				TGME49_249370	Promoter (<=1kb)	53
				TGME49_250710	Promoter (<=1kb)	339
				TGME49_262430	Promoter (<=1kb)	172
				TGME49_209112	Promoter (<=1kb)	180
				TGME49_239530	Promoter (<=1kb)	41
				TGME49_283510	Promoter (<=1kb)	113
				TGME49_266100	Promoter (<=1kb)	249
				TGME49_247390	Promoter (1-2kb)	186
				TGME49_271810	Distal Intergenic	81
				TGME49_278700	Promoter (<=1kb)	12
				TGME49_275870	Promoter (<=1kb)	36
				TGME49_236020	Promoter (<=1kb)	145
				TGME49_288380	Promoter (<=1kb)	178
				TGME49_231998	Distal Intergenic	255
				TGME49_238270	Promoter (<=1kb)	145
				TGME49_293900	Promoter (1-2kb)	83
				TGME49_315200	Promoter (<=1kb)	443
				TGME49_297810	Promoter (1-2kb)	83
				TGME49_211600	Promoter (1-2kb)	139
				TGME49_243720	Promoter (<=1kb)	199
				TGME49_268710	Promoter (1-2kb)	300
				TGME49_270880	Promoter (<=1kb)	26
				TGME49_315220	Promoter (<=1kb)	425
				TGME49_320140	Promoter (<=1kb)	292
				TGME49_240600	Promoter (1-2kb)	327
				TGME49_263300	Promoter (<=1kb)	428
[truncated: 781 more rows]
