# Supplementary material for: AP2XII-1 and AP2XI-2 Suppress Schizogony Gene Expression in Toxoplasma gondii
Source: Int J Mol Sci. 2024 May 18;25(10):5527. doi: 10.3390/ijms25105527 (PMC11122372; doi:10.3390/ijms25105527)
Supplement: Supplementary file 1 [file ijms-25-05527-s001.zip › Table S3.xlsx]

## Sheet: Sheet1
Table S3: DEG analysis for T. gondii tachyzoite after AP2XII-1 or AP2XII-2 knockdown. Gene transcription level is represented by transcripts per million (TPM). Gene features were presented according to its annotation in ToxoDB. AP2XII-1-J, AP2XII-1-Fan, and AP2XII-1-Antunes represents DEGs after AP2XII-1 knockdown generated in this study, Fan et al., 2023, mBio, and Antunes et al., 2023, Biorxiv,…
AP2XII-1-J			AP2XII-1-Fan			AP2XII-1-Antunes			AP2XII-2-Holmes
ID	log2FoldChange	pvalue	ID	log2FoldChange	pvalue	ID	log2FoldChange	pvalue	ID	log2FoldChange	pvalue
TGME49_257925	10.5376	1.24085e-17	TGME49_201180	4.39627	0	TGME49_306620	4.13422	1.59718e-150	TGME49_275680	-1.30126	9.52316e-18
TGME49_257910	10.5237	2.0708e-28	TGME49_206650	8.17089	0	TGME49_227430	2.73403	3.32709e-116	TGME49_306380	1.13036	3.66305e-15
TGME49_259030	8.93019	1.10785e-06	TGME49_209985	7.27312	0	TGME49_314250	5.12231	2.32964e-100	TGME49_248190	1.45818	1.61571e-13
TGME49_243110	8.73032	9.41448e-10	TGME49_227430	4.98574	0	TGME49_273980	3.62413	2.49689e-99	TGME49_295980	1.29914	1.75457e-12
TGME49_249040	8.04286	3.70495e-12	TGME49_257910	10.5235	0	TGME49_201180	3.47842	8.62205e-94	TGME49_295460	-2.13195	5.42461e-11
TGME49_243120	7.91819	3.95869e-06	TGME49_276920	3.90153	0	TGME49_281400	2.49968	8.88762e-88	TGME49_237410	1.37736	1.66579e-10
TGME49_278320	7.63834	5.34613e-05	TGME49_286000	3.95273	0	TGME49_240880	2.82183	7.486e-83	TGME49_270320	-1.31597	3.57924e-10
TGME49_231880	7.51343	1.33131e-10	TGME49_306620	3.69938	0	TGME49_245980	4.63545	6.6815e-68	TGME49_202490	1.12115	1.74405e-09
TGME49_258840	7.26665	8.28486e-08	TGME49_314250	7.79198	0	TGME49_293280	3.60385	5.40319e-66	TGME49_267120	-1.2541	2.85891e-09
TGME49_305110	7.16951	2.87954e-07	TGME49_318610	5.01363	0	TGME49_209985	3.49839	7.66135e-64	TGME49_215775	-1.03528	5.24028e-09
TGME49_278340	7.0664	6.82006e-07	TGME49_319360	5.67313	0	TGME49_215910	2.39661	1.85398e-59	TGME49_240450	-1.63394	8.71006e-09
TGME49_297090	6.95933	4.11024e-10	TGME49_240880	3.3661	8.60667e-302	TGME49_249540	2.02887	9.75425e-56	TGME49_310660	-1.90204	9.02547e-09
TGME49_316320	6.88139	1.16011e-05	TGME49_273980	5.64063	1.46372e-288	TGME49_319360	5.15902	9.56027e-54	TGME49_314358	1.7838	1.01914e-08
TGME49_251962	6.77932	1.80896e-10	TGME49_208020	5.70106	4.51303e-285	TGME49_244440	-1.58231	3.67908e-52	TGME49_312270	-1.0283	2.58044e-08
TGME49_312690	6.58524	4.60636e-51	TGME49_277060	6.72264	2.45967e-239	TGME49_224630	2.6898	1.39936e-43	TGME49_269920	-1.50826	5.43612e-08
TGME49_315370	6.52985	0.000232831	TGME49_237800	8.42106	2.52797e-237	TGME49_253790	2.53222	1.03937e-40	TGME49_294360	-1.4213	1.572e-07
TGME49_233610	6.27697	1.23649e-22	TGME49_245980	6.48308	2.28518e-232	TGME49_276200	3.78147	2.77075e-40	TGME49_271880	1.06193	1.7421e-07
TGME49_233670	6.27211	3.4943e-05	TGME49_237810	7.88599	2.72328e-231	TGME49_320490	1.18551	2.85794e-40	TGME49_210800	-1.01434	2.32889e-07
TGME49_243180	6.22474	2.75137e-10	TGME49_306510	3.13663	1.77618e-225	TGME49_276920	1.60597	1.12106e-33	TGME49_264485	-1.59602	2.56642e-07
TGME49_207965	6.15897	2.20238e-13	TGME49_205210	4.385	1.20673e-224	TGME49_267670	1.67524	2.37379e-33	TGME49_209060	1.07844	2.60994e-07
TGME49_316690	6.15738	1.01066e-85	TGME49_294240	7.32672	4.96283e-202	TGME49_316510	1.96685	2.91537e-32	TGME49_202370	-1.30975	3.62961e-07
TGME49_207050	6.15676	1.14263e-35	TGME49_278370	2.6915	5.89176e-201	TGME49_262050	-2.19859	4.81079e-32	TGME49_235670	2.05981	5.36987e-07
TGME49_258120	6.15099	1.12861e-08	TGME49_267670	2.75541	3.07049e-199	TGME49_268760	-1.20449	7.62372e-32	TGME49_310530	1.02648	6.17572e-07
TGME49_249750	6.12947	7.03636e-05	TGME49_286020	5.14502	1.44996e-192	TGME49_215895	2.39478	1.82337e-31	TGME49_312650	1.05893	6.53132e-07
TGME49_213430	6.10657	1.41577e-13	TGME49_294410	4.66892	4.4213e-186	TGME49_297070	-1.05926	7.98747e-31	TGME49_238270	-1.67454	7.83011e-07
TGME49_200480	5.96479	0.00132703	TGME49_282200	7.90878	2.91361e-182	TGME49_237800	4.79649	1.04187e-30	TGME49_267830	1.48215	8.58928e-07
TGME49_238460	5.963	3.29079e-05	TGME49_256800	7.19792	2.05181e-170	TGME49_286000	2.7603	2.1608e-30	TGME49_244140	1.62737	1.88679e-06
TGME49_278430	5.9601	4.73348e-37	TGME49_249150	5.19858	1.99332e-167	TGME49_275650	-1.84181	1.10722e-29	TGME49_271920	2.07104	2.17883e-06
TGME49_319630	5.83477	7.37726e-85	TGME49_301470	5.51989	1.66595e-164	TGME49_316690	4.01502	2.09309e-29	TGME49_223020	-2.06991	2.97321e-06
TGME49_237810	5.81755	1.82485e-47	TGME49_312690	8.22069	3.82595e-162	TGME49_310520	1.88577	3.93852e-29	TGME49_232780	-1.3462	3.6684e-06
TGME49_262470	5.61797	3.29308e-05	TGME49_232400	4.49186	1.93253e-161	TGME49_318525	1.29502	9.03204e-28	TGME49_293760	1.1369	3.67821e-06
TGME49_307603	5.61664	0.00110221	TGME49_267980	8.58036	8.64422e-161	TGME49_219660	3.29832	1.41616e-27	TGME49_253730	-1.91602	4.23032e-06
TGME49_301470	5.60216	8.33158e-34	TGME49_291910	5.4494	1.50997e-157	TGME49_252360	-1.42505	1.43056e-27	TGME49_275610	-1.05028	4.76914e-06
TGME49_237800	5.57035	3.88815e-71	TGME49_306450	7.52907	2.39881e-156	TGME49_214980	1.59573	3.74737e-27	TGME49_288610	-1.36656	5.30034e-06
TGME49_249150	5.56083	1.0631e-98	TGME49_222370	3.54152	2.6337e-154	TGME49_249150	4.34671	4.34118e-27	TGME49_264780	1.06934	5.79513e-06
TGME49_316580	5.5443	1.91833e-13	TGME49_293280	4.31547	1.74814e-152	TGME49_295105	-1.68603	9.84477e-27	TGME49_319590	1.26514	6.04027e-06
TGME49_251958	5.46143	1.14301e-47	TGME49_278390	2.42661	4.54917e-152	TGME49_294690	1.57231	1.70518e-26	TGME49_260570	-2.06057	1.02571e-05
TGME49_219660	5.40593	3.07115e-59	TGME49_311700	9.05235	7.72883e-149	TGME49_205210	2.7052	2.19292e-26	TGME49_244520	-2.07404	1.23003e-05
TGME49_315380	5.37187	0.00200415	TGME49_226450	4.90207	1.65948e-146	TGME49_278390	1.87407	3.9702e-26	TGME49_214070	-1.41905	1.27371e-05
TGME49_243482	5.21357	6.92255e-10	TGME49_243940	4.12441	1.46228e-145	TGME49_237550	1.96316	8.1032e-26	TGME49_223440	1.07057	1.3538e-05
TGME49_277705	5.13779	0.0048256	TGME49_295440	3.23198	2.06746e-145	TGME49_316130	6.23617	1.7578e-25	TGME49_293740	-1.17706	1.35754e-05
TGME49_256965	5.11951	0.000431829	TGME49_306455	6.70314	2.03456e-142	TGME49_240900	1.63443	2.0011e-25	TGME49_276980	-2.44582	1.36523e-05
TGME49_225950	5.11042	0.000528423	TGME49_202580	4.83865	5.37304e-142	TGME49_253690	-1.27532	2.28216e-25	TGME49_268880	-1.17898	1.61947e-05
TGME49_238220	5.05377	4.86414e-11	TGME49_269310	4.51402	1.29037e-140	TGME49_246160	3.04221	5.00694e-25	TGME49_310250	-1.20658	1.62115e-05
TGME49_296640	5.04797	2.62197e-13	TGME49_257925	7.89171	1.11083e-139	TGME49_286010	1.90167	3.66167e-24	TGME49_234360	-1.32859	1.74309e-05
TGME49_257970	5.0231	3.78199e-23	TGME49_301150	3.71207	2.90277e-135	TGME49_230170	1.58157	5.20937e-24	TGME49_240470	-1.62908	1.77939e-05
TGME49_240330	5.00183	0.000567679	TGME49_202050	6.77538	4.11024e-133	TGME49_280522	1.09045	7.39957e-23	TGME49_269980	-1.07065	1.82383e-05
TGME49_204000	4.96186	6.91948e-17	TGME49_318525	2.14863	2.0993e-132	TGME49_232670	1.18996	5.82454e-22	TGME49_250730	-1.50566	1.89084e-05
TGME49_275790	4.90949	3.32004e-15	TGME49_320250	6.98833	1.70514e-123	TGME49_232400	3.24629	1.03038e-21	TGME49_319658	-1.49845	2.01515e-05
TGME49_203800	4.89017	4.75755e-49	TGME49_307045	3.47242	1.59776e-120	TGME49_254880	-1.29454	1.21892e-21	TGME49_266900	-1.50518	2.08935e-05
TGME49_313840	4.82377	1.18791e-16	TGME49_259030	7.97043	2.38429e-119	TGME49_247520	-1.22031	2.03252e-21	TGME49_249950	1.22915	2.14657e-05
TGME49_320250	4.79003	2.14325e-11	TGME49_225105	5.6003	2.15819e-118	TGME49_281440	1.32442	2.55616e-21	TGME49_232500	1.46126	2.32445e-05
TGME49_231994	4.78381	0.000988084	TGME49_217420	7.65482	8.42159e-117	TGME49_306510	3.31216	4.96247e-21	TGME49_205340	-1.00257	2.51486e-05
TGME49_207010	4.78292	3.27708e-09	TGME49_278400	3.32353	1.3585e-115	TGME49_219738	2.12056	6.5765e-21	TGME49_262880	-2.26412	2.62371e-05
TGME49_233180	4.75006	2.1468e-37	TGME49_306500	8.05608	3.43126e-114	TGME49_229280	-1.21845	6.66939e-21	TGME49_314110	-1.22931	2.73867e-05
TGME49_207005	4.63929	7.27039e-16	TGME49_311490	3.376	1.891e-111	TGME49_208020	3.83641	7.47084e-21	TGME49_218590	-1.84778	2.84292e-05
TGME49_310680	4.61676	0.000501904	TGME49_318675	4.88945	8.16595e-111	TGME49_269310	3.82452	1.05248e-20	TGME49_269940	1.85258	2.84963e-05
TGME49_245980	4.55664	0	TGME49_257572	5.72218	4.05527e-107	TGME49_293430	-1.21098	1.28746e-20	TGME49_264160	1.88311	3.17693e-05
TGME49_278420	4.54514	1.58405e-07	TGME49_238220	8.26394	3.87066e-106	TGME49_288360	1.21672	2.28818e-20	TGME49_304890	-1.48529	3.45048e-05
TGME49_246070	4.52839	2.65831e-76	TGME49_228160	6.6378	3.19312e-105	TGME49_226950	1.69822	2.43905e-20	TGME49_207040	1.17373	3.95074e-05
TGME49_206650	4.47437	1.73937e-88	TGME49_264485	4.93204	4.50376e-104	TGME49_217760	1.50157	5.5716e-20	TGME49_299130	-2.37056	4.21252e-05
TGME49_202065	4.461	0.00470673	TGME49_294820	7.39736	2.8581e-103	TGME49_270510	-1.29308	7.87435e-20	TGME49_237600	-1.15167	4.26363e-05
TGME49_305100	4.43279	0.00340313	TGME49_311380	3.07679	1.39215e-102	TGME49_244380	-1.07148	8.77006e-20	TGME49_227400	1.22236	4.65238e-05
TGME49_306480	4.42198	3.44374e-64	TGME49_254330	6.31399	5.20337e-102	TGME49_261740	-1.11866	8.91097e-20	TGME49_293430	-1.14195	4.82336e-05
TGME49_315127	4.40717	0.00413593	TGME49_253790	2.8787	2.21356e-101	TGME49_257520	-1.42744	1.79449e-19	TGME49_202568	1.42012	5.46517e-05
TGME49_244335	4.29972	4.29734e-90	TGME49_278090	4.29636	1.09501e-100	TGME49_266300	-1.10843	2.6593e-19	TGME49_238930	1.74809	5.76638e-05
TGME49_257810	4.27456	2.18349e-05	TGME49_316130	5.53021	1.59167e-98	TGME49_311380	2.31534	4.15031e-19	TGME49_266930	-2.01063	6.11867e-05
TGME49_275798	4.25084	1.31864e-08	TGME49_257670	4.93523	6.32765e-97	TGME49_248190	1.66185	6.8701e-19	TGME49_217400	-4.9288	6.31771e-05
TGME49_223258	4.14303	1.06522e-20	TGME49_257970	5.54722	5.71841e-96	TGME49_296231	1.18152	7.64293e-19	TGME49_224630	-4.92836	6.36689e-05
TGME49_285400	4.09083	0.00197428	TGME49_277230	5.83185	2.44283e-95	TGME49_243940	2.15307	7.99499e-19	TGME49_318620	-1.41708	6.81967e-05
TGME49_220340	4.07555	7.85469e-20	TGME49_231880	8.19171	4.5704e-94	TGME49_251660	2.57411	1.21754e-18	TGME49_319312	1.38558	6.86163e-05
TGME49_294240	4.04822	7.32958e-33	TGME49_300130	3.69756	5.25903e-91	TGME49_293290	3.73362	1.79783e-18	TGME49_286210	4.92539	7.15782e-05
TGME49_294820	4.04631	2.42212e-67	TGME49_278240	2.95086	1.06743e-90	TGME49_208730	1.61481	2.66812e-18	TGME49_309130	-3.04582	7.47979e-05
TGME49_294410	4.02589	4.06132e-159	TGME49_240390	5.10248	2.22307e-90	TGME49_275840	1.66711	4.81348e-18	TGME49_319308	1.22721	7.57078e-05
TGME49_266610	3.95764	5.24146e-09	TGME49_239090	6.76388	2.817e-90	TGME49_250670	1.22464	6.89782e-18	TGME49_269730	-1.06824	9.15258e-05
TGME49_224760	3.9306	4.72707e-20	TGME49_212410	2.85749	7.96475e-90	TGME49_214410	1.54668	7.32922e-18	TGME49_309930	1.13403	9.32499e-05
TGME49_224770	3.88971	4.62884e-42	TGME49_240930	6.42533	1.13802e-88	TGME49_227420	2.30381	9.10097e-18	TGME49_224620	-1.05683	0.000104349
TGME49_228050	3.86461	4.15374e-05	TGME49_219660	4.84166	4.06234e-88	TGME49_233735	1.35719	1.78668e-17	TGME49_238980	-4.93241	0.000105216
TGME49_278380	3.85958	2.72739e-42	TGME49_266610	7.5713	7.07864e-86	TGME49_218270	-1.09168	1.85459e-17	TGME49_220860	-1.04752	0.00010526
TGME49_280605	3.78252	0.000463363	TGME49_246070	4.52546	2.01743e-85	TGME49_240930	4.1896	3.93664e-17	TGME49_225130	-3.01109	0.00010745
TGME49_238210	3.75008	1.29434e-26	TGME49_268970	2.96435	5.20809e-85	TGME49_201860	-1.1908	4.17876e-17	TGME49_222250	-1.1551	0.000108814
TGME49_217370	3.74894	0.000598036	TGME49_278380	6.88785	3.05051e-83	TGME49_291960	-1.13594	4.33577e-17	TGME49_315600	-1.05946	0.000117639
TGME49_226450	3.72638	5.67068e-31	TGME49_275355	5.71649	9.04174e-83	TGME49_311680	-1.21304	6.0039e-17	TGME49_213752	1.36166	0.000124632
TGME49_294595	3.70721	0.000132549	TGME49_215680	2.08937	9.24452e-83	TGME49_229720	1.61618	6.61936e-17	TGME49_238170	1.19679	0.000147231
TGME49_320230	3.69812	4.0395e-99	TGME49_214430	2.73086	7.47747e-82	TGME49_213570	-1.11348	8.21399e-17	TGME49_225020	-1.12488	0.000155013
TGME49_275850	3.67872	6.53658e-97	TGME49_203800	6.99214	8.10409e-81	TGME49_246150	2.60383	9.59736e-17	TGME49_313160	-4.67675	0.000167456
TGME49_310580	3.65577	4.99277e-18	TGME49_238980	9.69812	4.31955e-79	TGME49_315770	-1.00899	1.66837e-16	TGME49_248660	1.698	0.000169805
TGME49_230598	3.63685	0.00163635	TGME49_254060	4.15987	1.59099e-76	TGME49_285870	-1.076	1.6811e-16	TGME49_313930	-2.11191	0.000177432
TGME49_236400	3.62367	9.88017e-09	TGME49_295430	6.26413	1.38995e-75	TGME49_218880	-1.04968	2.8975e-16	TGME49_241140	1.07765	0.000190748
TGME49_316130	3.61128	1.58413e-17	TGME49_238490	5.50755	7.15425e-75	TGME49_248180	1.85393	4.38522e-16	TGME49_202375	1.13753	0.000214797
TGME49_273980	3.61066	3.32693e-272	TGME49_224770	7.21705	7.80842e-75	TGME49_299000	1.56154	4.58287e-16	TGME49_318760	1.52447	0.000216282
TGME49_282200	3.59456	2.49665e-30	TGME49_286010	1.64031	5.75452e-73	TGME49_213255	2.33816	5.5297e-16	TGME49_311450	-1.29105	0.000217394
TGME49_238440	3.55047	1.78525e-12	TGME49_320090	2.87882	1.1278e-70	TGME49_300055	1.44889	5.60462e-16	TGME49_279330	-1.80391	0.000229122
TGME49_217420	3.54201	1.38014e-34	TGME49_316690	11.1571	1.58458e-70	TGME49_262730	-1.0322	6.61058e-16	TGME49_269910	-1.35926	0.000231171
TGME49_257670	3.5218	4.53042e-54	TGME49_251958	7.00264	2.22796e-70	TGME49_292260	2.48222	8.32192e-16	TGME49_207920	1.06747	0.00023127
TGME49_236290	3.51647	1.52971e-07	TGME49_207050	9.03728	5.88367e-69	TGME49_318610	2.10521	9.91649e-16	TGME49_306920	-1.1072	0.000232853
TGME49_297920	3.49399	1.70145e-57	TGME49_265140	2.88437	2.51348e-68	TGME49_260820	-1.01414	1.202e-15	TGME49_253035	1.09276	0.000244899
TGME49_291910	3.46366	2.90967e-15	TGME49_270670	3.07895	1.05892e-67	TGME49_294410	4.92798	1.30182e-15	TGME49_269750	1.57479	0.000246053
TGME49_311490	3.45458	3.26376e-46	TGME49_223550	1.67501	1.69854e-65	TGME49_202620	1.0147	1.41611e-15	TGME49_252200	-4.44554	0.000255805
TGME49_257000	3.45332	5.61045e-61	TGME49_250670	1.99492	2.29396e-65	TGME49_228230	1.13708	1.43233e-15	TGME49_209080	1.03116	0.00026367
TGME49_297065	3.41432	0.00340188	TGME49_306480	4.70212	1.09566e-64	TGME49_318675	3.93945	1.51969e-15
TGME49_276920	3.40605	1.72397e-274	TGME49_270680	3.86988	2.21481e-64	TGME49_212410	1.83185	1.54357e-15
TGME49_203770	3.39377	9.9958e-09	TGME49_204290	7.22191	2.71183e-63	TGME49_252210	1.18312	2.23126e-15
TGME49_281660	3.393	3.43243e-08	TGME49_224630	2.0638	8.6882e-63	TGME49_278090	2.43059	2.5889e-15
TGME49_254060	3.3877	9.23728e-59	TGME49_229720	1.84418	6.28016e-61	TGME49_205250	-1.26623	3.27881e-15
TGME49_252255	3.37582	2.11227e-20	TGME49_221890	4.08231	1.7201e-60	TGME49_306700	2.35348	4.60201e-15
TGME49_307045	3.3601	3.39377e-28	TGME49_214080	2.23584	1.98874e-60	TGME49_258360	-1.10231	4.73087e-15
TGME49_277060	3.29775	5.66264e-23	TGME49_274170	3.63673	3.33304e-60	TGME49_277060	9.19069	1.2773e-14
TGME49_238490	3.28539	9.90867e-25	TGME49_292260	3.27527	5.22101e-60	TGME49_315360	-1.07554	1.43065e-14
TGME49_268800	3.25682	1.97707e-17	TGME49_319630	6.06716	7.86417e-60	TGME49_300052	1.87955	1.4501e-14
TGME49_311485	3.24608	1.81033e-09	TGME49_301210	2.12897	1.15933e-59	TGME49_316400	-1.12961	1.60808e-14
TGME49_207015	3.23873	9.93208e-06	TGME49_238210	6.9279	2.2661e-59	TGME49_262850	1.0473	1.8113e-14
TGME49_244450	3.15127	4.46363e-179	TGME49_294400	3.7189	9.98493e-59	TGME49_216200	3.56802	1.93268e-14
TGME49_291920	3.11701	1.15694e-06	TGME49_273985	4.06053	1.1204e-57	TGME49_221620	-1.07974	2.56197e-14
TGME49_242110	3.10594	0.000565069	TGME49_224845	2.88479	1.48451e-57	TGME49_264420	2.02842	2.94377e-14
TGME49_301690	3.088	5.69247e-163	TGME49_241710	1.38203	6.18151e-57	TGME49_239770	-1.38134	2.99291e-14
TGME49_270655	3.07481	0.000398193	TGME49_297647	1.5562	2.77221e-56	TGME49_286020	5.11513	3.06218e-14
TGME49_315715	3.05873	8.6897e-05	TGME49_281400	1.10619	3.50084e-56	TGME49_211470	-2.29045	3.10525e-14
TGME49_255620	3.05657	5.99259e-09	TGME49_307090	2.51038	6.81745e-56	TGME49_275470	-1.0214	3.90366e-14
TGME49_319360	3.05109	2.92105e-145	TGME49_213460	2.59749	1.23223e-55	TGME49_213880	-2.12292	4.25877e-14
TGME49_281675	3.04615	1.52378e-117	TGME49_244450	2.09194	4.01509e-55	TGME49_224030	1.13236	4.84002e-14
TGME49_243680	3.02537	1.51104e-51	TGME49_295390	3.94744	5.33872e-55	TGME49_236040	-1.09022	5.98803e-14
TGME49_204300	3.0058	0.000816121	TGME49_217410	2.24525	2.09484e-54	TGME49_240390	3.04219	7.37392e-14
TGME49_290590	2.9814	6.83288e-05	TGME49_233180	7.21982	2.49228e-54	TGME49_204440	2.56458	8.34428e-14
TGME49_269300	2.97629	2.15294e-31	TGME49_257530	1.75592	6.29195e-54	TGME49_263270	1.32409	1.07078e-13
TGME49_295720	2.91094	1.40242e-16	TGME49_278430	7.76111	2.02749e-52	TGME49_225540	1.11791	1.62379e-13
TGME49_224750	2.88651	7.23975e-10	TGME49_276980	1.5991	5.90474e-52	TGME49_242625	1.02455	1.72484e-13
TGME49_240370	2.8759	6.93617e-05	TGME49_275850	4.65304	2.92006e-51	TGME49_233430	1.17817	2.3057e-13
TGME49_248470	2.85833	1.73639e-32	TGME49_299020	7.15403	5.65231e-51	TGME49_314660	1.27874	3.78196e-13
TGME49_266600	2.85712	4.26222e-07	TGME49_219742	3.2171	2.24113e-50	TGME49_310210	1.15028	4.23277e-13
TGME49_202580	2.85537	2.72021e-266	TGME49_249540	1.42399	3.71429e-50	TGME49_312430	1.38631	4.36821e-13
TGME49_202010	2.85214	2.05137e-155	TGME49_253330	-2.10318	6.13866e-50	TGME49_314550	2.18033	6.87221e-13
TGME49_204010	2.84844	2.47146e-10	TGME49_247540	2.76374	7.14989e-50	TGME49_250500	1.5407	7.59423e-13
TGME49_298070	2.83364	3.65335e-62	TGME49_287040	1.95365	2.65888e-49	TGME49_211340	1.20319	7.85622e-13
TGME49_260480	2.8169	5.11661e-06	TGME49_320230	2.55188	4.51259e-49	TGME49_291920	4.63307	8.73776e-13
TGME49_276200	2.81218	2.77293e-38	TGME49_281675	2.40599	2.05601e-48	TGME49_300980	2.62243	9.07007e-13
TGME49_314340	2.80961	8.90474e-12	TGME49_212420	3.23407	2.95976e-48	TGME49_213460	2.43564	9.60141e-13
TGME49_270680	2.78895	7.62058e-18	TGME49_258840	7.17915	4.14914e-48	TGME49_267585	1.46808	1.18474e-12
TGME49_288475	2.76803	1.011e-08	TGME49_240240	5.21911	4.14991e-48	TGME49_293390	1.17594	1.19361e-12
TGME49_235315	2.76181	0.000111831	TGME49_239020	3.07305	2.22609e-47	TGME49_219640	1.29895	1.28712e-12
TGME49_256800	2.76159	2.7475e-18	TGME49_267585	1.7484	6.04727e-47	TGME49_242860	-1.09111	1.29393e-12
TGME49_307070	2.73464	2.37925e-06	TGME49_243190	6.4229	8.46331e-47	TGME49_245440	3.6608	1.34233e-12
TGME49_306500	2.65755	3.9645e-21	TGME49_243382	4.98503	9.5661e-47	TGME49_262970	2.51262	1.44137e-12
TGME49_309300	2.65317	3.12214e-06	TGME49_250500	2.18968	1.14308e-46	TGME49_279550	1.90775	1.58868e-12
TGME49_238980	2.64527	0.00315707	TGME49_202010	1.54543	2.58202e-46	TGME49_267580	1.26792	2.25423e-12
TGME49_222080	2.63293	5.89114e-09	TGME49_286740	2.27984	7.09157e-46	TGME49_293500	2.94376	2.6194e-12
TGME49_270670	2.63174	1.45283e-64	TGME49_312175	-1.03177	1.1123e-45	TGME49_264430	2.6632	2.70428e-12
TGME49_224680	2.62373	0.00297905	TGME49_268800	7.44077	1.78691e-45	TGME49_297870	-1.13615	2.73425e-12
TGME49_243378	2.60271	4.48032e-13	TGME49_305790	1.79651	3.33036e-45	TGME49_253030	1.13789	2.90146e-12
TGME49_232770	2.60262	0.00203783	TGME49_207965	7.05699	3.48436e-45	TGME49_306500	2.91589	3.21588e-12
TGME49_293500	2.575	1.94134e-27	TGME49_240900	1.69163	6.67729e-45	TGME49_239530	-1.12675	3.56695e-12
TGME49_222188	2.55542	2.5226e-06	TGME49_257568	5.01692	8.50004e-45	TGME49_254770	-1.09177	4.52578e-12
TGME49_212410	2.5499	4.17672e-71	TGME49_310520	1.55766	1.66546e-44	TGME49_233460	-1.08202	4.56546e-12
TGME49_275795	2.54798	0.00339643	TGME49_245770	2.59924	7.87292e-44	TGME49_216460	-1.12898	4.6893e-12
TGME49_202910	2.54647	1.85497e-39	TGME49_209180	3.3066	9.15529e-44	TGME49_318430	-1.11044	4.74768e-12
TGME49_212420	2.54167	2.6531e-23	TGME49_296640	5.51519	1.0327e-43	TGME49_267980	1.98378	6.27761e-12
TGME49_292260	2.53127	1.86337e-21	TGME49_243378	5.53856	4.10565e-43	TGME49_235478	1.00431	7.98033e-12
TGME49_267470	2.48246	7.89441e-11	TGME49_290000	2.2782	5.11336e-43	TGME49_237190	-1.03026	9.13705e-12
TGME49_235010	2.48097	3.20932e-10	TGME49_224230	1.76757	2.39699e-42	TGME49_223000	-1.08553	9.36717e-12
TGME49_254850	2.47857	6.44237e-08	TGME49_266600	6.40798	5.59758e-42	TGME49_216190	1.62047	9.51081e-12
TGME49_268310	2.47248	0.00149189	TGME49_210095	6.91971	6.22544e-42	TGME49_312690	3.465	1.0151e-11
TGME49_307050	2.46694	0.00012278	TGME49_278420	8.81154	1.43487e-41	TGME49_246978	1.13442	1.32085e-11
TGME49_216200	2.46078	3.21878e-23	TGME49_301690	1.18321	8.88273e-41	TGME49_218960	1.11238	1.49167e-11
TGME49_204290	2.45928	7.09953e-06	TGME49_320490	1.0144	2.53015e-40	TGME49_293760	-1.08882	1.78486e-11
TGME49_229405	2.45101	2.4609e-25	TGME49_264660	3.10473	3.20823e-40	TGME49_254365	-1.15452	1.87118e-11
TGME49_307030	2.43449	7.23885e-51	TGME49_230480	1.47266	7.88721e-40	TGME49_285800	1.14481	1.98002e-11
TGME49_208020	2.42927	1.96456e-157	TGME49_293500	2.10586	8.31104e-40	TGME49_299010	1.43295	2.14229e-11
TGME49_267130	2.42915	2.67635e-31	TGME49_297090	9.4973	2.88448e-39	TGME49_267130	1.6862	2.76355e-11
TGME49_286000	2.42361	3.14938e-96	TGME49_207010	5.85406	5.74718e-38	TGME49_244280	-1.17119	2.86813e-11
TGME49_243382	2.42132	1.87086e-17	TGME49_307050	3.4821	8.35283e-38	TGME49_261370	1.08836	2.94014e-11
TGME49_274170	2.41965	1.09182e-10	TGME49_301170	2.55062	2.7493e-37	TGME49_228710	1.73343	2.94353e-11
TGME49_318610	2.41397	9.26421e-107	TGME49_251962	9.53641	2.82744e-37	TGME49_251670	1.27531	3.03329e-11
TGME49_295430	2.40789	5.14365e-66	TGME49_270650	1.42065	1.40697e-36	TGME49_227630	3.11124	3.09492e-11
TGME49_223560	2.40594	2.52573e-59	TGME49_272440	3.56555	4.08643e-36	TGME49_301210	1.38776	3.24427e-11
TGME49_309830	2.3988	0.000475897	TGME49_276200	3.19524	4.8276e-36	TGME49_320230	1.76919	3.52516e-11
TGME49_295390	2.38657	2.21455e-17	TGME49_269240	1.48706	6.21049e-36	TGME49_314570	2.73717	3.66544e-11
TGME49_269310	2.38455	3.28036e-35	TGME49_301355	2.0031	7.42759e-36	TGME49_283550	1.06095	4.21287e-11
TGME49_295440	2.37837	1.63485e-133	TGME49_249510	1.66358	1.13356e-35	TGME49_209090	-1.10734	4.38721e-11
TGME49_276980	2.32776	5.76753e-60	TGME49_263220	1.8182	2.89684e-35	TGME49_217410	1.19393	4.83029e-11
TGME49_306570	2.31572	0.000911998	TGME49_263820	1.30416	4.01018e-35	TGME49_222120	1.28173	4.91243e-11
TGME49_254320	2.3032	0.00453948	TGME49_320680	2.67056	4.33954e-35	TGME49_249300	-1.00557	4.96888e-11
TGME49_281470	2.29933	0.000203783	TGME49_217720	1.54854	8.3355e-35	TGME49_244450	1.45027	4.99812e-11
TGME49_314250	2.29082	5.74067e-55	TGME49_204500	1.98084	2.08638e-34	TGME49_306630	1.8132	5.53478e-11
TGME49_318675	2.27643	8.49054e-31	TGME49_238440	6.73415	2.20972e-34	TGME49_305050	-1.11363	6.04854e-11
TGME49_267308	2.26255	6.19564e-05	TGME49_288360	1.51269	4.61974e-34	TGME49_263785	1.16897	6.14372e-11
TGME49_204500	2.2587	4.07598e-32	TGME49_221880	3.71885	1.22955e-33	TGME49_232500	-1.08991	6.76764e-11
TGME49_219742	2.25264	2.47583e-12	TGME49_278340	5.21127	1.5558e-33	TGME49_224928	1.80478	6.99559e-11
TGME49_235000	2.24496	7.53814e-10	TGME49_219348	8.46768	3.73582e-33	TGME49_241710	1.73019	7.11388e-11
TGME49_278090	2.23669	4.12987e-20	TGME49_304930	3.97989	3.80092e-33	TGME49_236660	1.05448	7.46607e-11
TGME49_223060	2.23271	1.69716e-121	TGME49_208340	-1.24353	7.27902e-33	TGME49_305560	-1.28936	7.67131e-11
TGME49_229730	2.22987	7.58943e-05	TGME49_215895	1.35478	6.81776e-32	TGME49_210245	6.78274	8.05615e-11
TGME49_276880	2.21958	1.83023e-08	TGME49_207600	2.62056	9.91148e-32	TGME49_231350	-1.26505	8.30904e-11
TGME49_266270	2.18563	1.11732e-06	TGME49_309352	4.77997	2.21055e-31	TGME49_217700	-1.3991	9.40025e-11
TGME49_285940	2.18408	0.000130292	TGME49_267130	2.01189	2.92361e-31	TGME49_273360	1.04879	9.45634e-11
TGME49_278760	2.18172	3.26299e-20	TGME49_243680	3.10409	3.27063e-31	TGME49_271110	1.13466	9.46014e-11
TGME49_307090	2.13199	6.49924e-24	TGME49_281930	1.56363	3.95908e-31	TGME49_272320	1.34527	9.64337e-11
TGME49_243190	2.12727	1.96439e-11	TGME49_222060	1.34353	5.54755e-31	TGME49_238490	4.25771	9.83055e-11
TGME49_254160	2.11378	1.01292e-05	TGME49_257990	1.00801	6.23298e-31	TGME49_237810	7.79311	1.00194e-10
TGME49_275355	2.11305	4.52314e-11	TGME49_267150	2.21617	8.1864e-31	TGME49_319308	1.44482	1.11737e-10
TGME49_209985	2.10897	1.55193e-103	TGME49_223258	2.95455	8.86241e-31	TGME49_270670	1.77579	1.2532e-10
TGME49_221420	2.10428	0.000144334	TGME49_233610	6.32238	9.54242e-31	TGME49_257670	4.91498	1.45244e-10
TGME49_286020	2.09604	6.20328e-30	TGME49_244940	-1.98488	2.93992e-30	TGME49_277240	-1.10589	1.51426e-10
TGME49_248140	2.0934	4.42092e-64	TGME49_284310	1.05018	4.23544e-30	TGME49_238210	3.42619	1.70075e-10
TGME49_230602	2.08532	0.0031273	TGME49_294330	1.29491	4.25734e-30	TGME49_247730	1.41491	1.91482e-10
TGME49_202050	2.08307	1.79082e-25	TGME49_278245	2.99858	1.21899e-29	TGME49_231960	1.20109	2.07111e-10
TGME49_268970	2.07894	3.49743e-33	TGME49_267460	2.53153	1.24609e-29	TGME49_223450	1.20532	2.41251e-10
TGME49_307590	2.0635	8.19683e-09	TGME49_297920	2.39761	1.61281e-29	TGME49_307605	-1.03747	2.53759e-10
TGME49_268300	2.05727	2.46882e-11	TGME49_321480	3.01269	3.40482e-29	TGME49_320250	4.1609	3.0175e-10
TGME49_253755	2.05393	2.81334e-06	TGME49_321710	6.24632	6.42727e-29	TGME49_310740	-1.37537	3.29033e-10
TGME49_219570	2.0267	0.000367217	TGME49_284620	-1.16989	7.78361e-29	TGME49_278440	1.0785	3.36559e-10
TGME49_301210	2.02277	8.19843e-59	TGME49_300990	2.03027	1.72631e-28	TGME49_264660	1.48595	3.45737e-10
TGME49_211370	2.0219	0.00234114	TGME49_319520	3.25243	2.84119e-28	TGME49_293060	1.02017	3.98015e-10
TGME49_250220	2.01732	4.74915e-57	TGME49_301240	7.50008	3.69036e-28	TGME49_293580	-1.07219	4.01841e-10
TGME49_270210	2.00843	1.38115e-10	TGME49_305110	8.8907	4.61759e-28	TGME49_259720	1.08995	4.08191e-10
TGME49_213880	2.00052	7.52818e-15	TGME49_200270	1.12332	1.3199e-27	TGME49_206650	2.72862	4.47446e-10
TGME49_210095	2.00007	0.00265211	TGME49_214420	1.97002	1.52182e-27	TGME49_225230	1.1389	4.97796e-10
TGME49_278370	1.99529	1.14534e-28	TGME49_251660	1.56036	1.57873e-27	TGME49_225880	-1.40257	5.35164e-10
TGME49_202060	1.99339	0.000105671	TGME49_271320	2.21369	1.67319e-27	TGME49_274120	-1.15184	5.81864e-10
TGME49_319690	1.95459	1.46231e-08	TGME49_266270	4.06249	1.77801e-27	TGME49_297920	3.70896	5.90634e-10
TGME49_224845	1.94798	1.42654e-21	TGME49_208730	1.96011	3.28847e-27	TGME49_276910	-1.00055	6.06736e-10
TGME49_281400	1.9222	5.84179e-250	TGME49_229690	-1.38673	3.85042e-27	TGME49_308075	-1.18071	6.20866e-10
TGME49_228065	1.91906	0.000853783	TGME49_216200	5.37181	4.51645e-27	TGME49_214960	1.05359	6.94376e-10
TGME49_253770	1.91006	8.49771e-14	TGME49_285860	1.24498	5.94449e-27	TGME49_258462	-1.00004	6.97327e-10
TGME49_266670	1.90634	4.76195e-05	TGME49_219640	1.4165	1.53238e-26	TGME49_254135	1.80418	7.35323e-10
TGME49_278400	1.87147	3.36213e-28	TGME49_285480	-1.55634	4.44954e-26	TGME49_269960	-1.6089	7.61909e-10
TGME49_230640	1.87112	1.35194e-30	TGME49_250760	1.25498	6.53926e-26	TGME49_224230	1.32987	7.62118e-10
TGME49_305790	1.85458	4.78252e-28	TGME49_240770	4.18356	6.72218e-26	TGME49_300990	3.24393	8.04021e-10
TGME49_288520	1.84918	4.66203e-09	TGME49_230640	1.43269	1.03178e-25	TGME49_306455	2.93954	8.04503e-10
TGME49_213460	1.81552	1.85137e-53	TGME49_204440	1.85737	1.69775e-25	TGME49_311070	1.19868	9.78043e-10
TGME49_321710	1.77093	0.00038793	TGME49_218188	1.89991	1.82639e-25	TGME49_258230	-1.11293	9.90904e-10
TGME49_263030	1.76241	9.8461e-05	TGME49_273330	-1.11855	2.08518e-25	TGME49_212190	-1.00193	9.91571e-10
TGME49_320680	1.75968	7.37309e-55	TGME49_215910	1.47437	5.64996e-25	TGME49_295100	-1.52166	1.07856e-09
TGME49_306630	1.74093	2.62732e-36	TGME49_243120	9.14017	6.26087e-25	TGME49_257910	7.31869	1.07876e-09
TGME49_263020	1.74	4.81686e-08	TGME49_275798	9.0204	2.48289e-24	TGME49_232520	-1.17156	1.16495e-09
TGME49_217720	1.73639	7.39325e-47	TGME49_275610	-1.28011	3.50608e-24	TGME49_319630	4.23868	1.31399e-09
TGME49_292600	1.73015	1.04142e-17	TGME49_246010	2.14434	5.41514e-24	TGME49_296015	-1.1248	1.35117e-09
TGME49_279450	1.72786	2.62395e-15	TGME49_300120	1.07587	6.22838e-24	TGME49_201240	-1.3962	1.37211e-09
TGME49_200320	1.7239	5.93766e-33	TGME49_215775	1.42655	9.41643e-24	TGME49_237540	1.70805	1.39295e-09
TGME49_278882	1.69963	4.39276e-18	TGME49_233870	-1.4315	1.15739e-23	TGME49_228070	1.15473	1.53349e-09
TGME49_320200	1.69524	3.87892e-38	TGME49_293290	3.83549	1.30744e-23	TGME49_271250	-1.28611	2.00875e-09
TGME49_240390	1.69472	5.77066e-23	TGME49_213480	2.50795	1.53455e-23	TGME49_282140	1.1861	2.27453e-09
TGME49_203590	1.68767	0.00175182	TGME49_278878	1.24077	2.59684e-23	TGME49_291910	3.55281	2.34914e-09
TGME49_311380	1.67515	1.95127e-45	TGME49_275790	8.64009	1.1461e-22	TGME49_214280	1.37239	2.40471e-09
TGME49_229720	1.67136	9.17757e-54	TGME49_235010	3.80791	1.18475e-22	TGME49_272370	1.22743	2.75031e-09
TGME49_315520	1.66506	7.20999e-08	TGME49_224760	3.88052	1.33194e-22	TGME49_213560	-2.42669	2.85738e-09
TGME49_230650	1.66319	1.83076e-22	TGME49_249702	-1.36759	1.37375e-22	TGME49_253930	1.60429	2.95984e-09
TGME49_243700	1.66122	0.0010996	TGME49_269300	1.76557	1.48542e-22	TGME49_214430	1.43342	3.26813e-09
TGME49_285860	1.6429	4.12552e-33	TGME49_250360	1.21984	1.76224e-22	TGME49_208780	-1.14754	3.44488e-09
TGME49_278240	1.62861	9.80327e-26	TGME49_319380	1.37133	2.71808e-22	TGME49_238440	4.02367	3.70129e-09
TGME49_240290	1.62237	0.00022588	TGME49_244335	2.81985	2.98533e-22	TGME49_263220	1.08387	3.81707e-09
TGME49_310520	1.61167	3.08006e-73	TGME49_212900	1.34177	3.69451e-22	TGME49_223480	1.9738	4.43855e-09
TGME49_263220	1.60742	6.12454e-62	TGME49_236400	2.73426	4.28409e-22	TGME49_244120	1.00435	4.53003e-09
TGME49_315910	1.6052	1.15403e-62	TGME49_309300	4.46688	4.38003e-22	TGME49_255180	1.30062	4.85445e-09
TGME49_294805	1.60397	1.72588e-12	TGME49_220340	4.10078	4.46188e-22	TGME49_219742	2.56369	5.16716e-09
TGME49_319695	1.59931	1.28603e-12	TGME49_244510	1.49215	1.26587e-21	TGME49_319720	-1.38825	5.28635e-09
TGME49_206660	1.59528	1.63625e-05	TGME49_316510	1.46708	1.34431e-21	TGME49_202060	5.48133	5.41501e-09
TGME49_295690	1.5846	5.02263e-34	TGME49_222188	3.87471	1.37355e-21	TGME49_269420	1.48169	5.44453e-09
TGME49_214430	1.57764	1.93467e-85	TGME49_293300	1.21519	1.6235e-21	TGME49_205330	-1.21819	5.48826e-09
TGME49_311390	1.57603	1.32108e-23	TGME49_223060	1.61191	2.08747e-21	TGME49_290682	1.66078	5.7186e-09
TGME49_278878	1.57538	2.28698e-17	TGME49_254890	1.62613	2.49611e-21	TGME49_290225	1.10848	5.91214e-09
TGME49_239310	1.57244	1.20125e-33	TGME49_245435	1.14033	3.22938e-21	TGME49_264485	1.75808	6.29795e-09
TGME49_207600	1.57221	2.69004e-18	TGME49_224940	1.19324	6.41741e-21	TGME49_216130	-1.02625	6.57336e-09
TGME49_214760	1.56972	3.28097e-29	TGME49_217400	1.12006	6.42689e-21	TGME49_213100	2.92732	7.25609e-09
TGME49_319380	1.56795	2.10085e-11	TGME49_313840	1.89368	1.00088e-20	TGME49_319620	1.2886	7.30188e-09
TGME49_214190	1.56244	4.73446e-06	TGME49_273990	1.57041	1.20702e-20	TGME49_214120	1.47818	7.70192e-09
TGME49_283882	1.55818	8.56118e-05	TGME49_295720	2.34817	2.03947e-20	TGME49_233140	-1.25097	8.30492e-09
TGME49_235515	1.55774	1.71487e-21	TGME49_240520	-1.06505	3.15208e-20	TGME49_232260	-1.10153	8.75005e-09
TGME49_294785	1.55193	6.99266e-12	TGME49_204300	10.5376	3.94197e-20	TGME49_212810	1.91503	9.84284e-09
TGME49_240880	1.54034	2.2155e-54	TGME49_324800	1.70264	4.01083e-20	TGME49_255740	1.08742	1.08652e-08
TGME49_220585	1.53491	4.11657e-05	TGME49_252210	1.30859	4.48221e-20	TGME49_285950	1.04273	1.217e-08
TGME49_227430	1.53364	3.59385e-92	TGME49_207005	4.8219	5.159e-20	TGME49_254420	1.28779	1.23328e-08
TGME49_300790	1.51997	1.3643e-09	TGME49_219738	2.05199	5.25406e-20	TGME49_263120	1.3173	1.3504e-08
TGME49_304930	1.51208	6.59637e-17	TGME49_273120	-1.59424	6.46504e-20	TGME49_211300	-1.31208	1.39434e-08
TGME49_301218	1.5081	5.52263e-05	TGME49_239310	1.25933	6.66502e-20	TGME49_251570	1.79477	1.42971e-08
TGME49_219640	1.50218	1.02561e-32	TGME49_289740	2.36959	9.85051e-20	TGME49_270750	1.0085	1.75368e-08
TGME49_315900	1.49931	1.19426e-36	TGME49_214800	1.29686	1.09283e-19	TGME49_301130	-1.26618	1.77954e-08
TGME49_272440	1.49569	4.42439e-11	TGME49_229390	1.4753	1.17638e-19	TGME49_305200	1.09981	1.90607e-08
TGME49_225435	1.49378	0.000334803	TGME49_222080	2.95736	1.48239e-19	TGME49_257970	6.76392	1.92227e-08
TGME49_313385	1.48621	7.78216e-08	TGME49_254340	1.61281	3.45043e-19	TGME49_300360	-1.60673	1.99163e-08
TGME49_285825	1.48055	0.00218679	TGME49_241310	1.06981	3.86124e-19	TGME49_294240	3.52616	2.6764e-08
TGME49_273110	1.47999	2.18195e-08	TGME49_237595	2.64756	5.5709e-19	TGME49_311490	1.96009	3.01845e-08
TGME49_286740	1.47925	9.89206e-18	TGME49_214070	3.21116	5.94376e-19	TGME49_291010	-1.95966	3.13088e-08
TGME49_237450	1.47699	0.00015653	TGME49_273110	2.4951	7.43386e-19	TGME49_309890	1.08087	3.31071e-08
TGME49_215680	1.4661	1.07757e-40	TGME49_249300	-1.23757	7.76439e-19	TGME49_259115	1.2615	3.68361e-08
TGME49_309865	1.46348	2.31018e-05	TGME49_218780	-1.11222	9.32469e-19	TGME49_220940	1.30251	3.90873e-08
TGME49_264260	1.45997	6.54667e-05	TGME49_227970	-1.25448	1.24057e-18	TGME49_237860	1.83583	4.01819e-08
TGME49_201180	1.45653	7.41541e-69	TGME49_329800	-2.03655	1.31152e-18	TGME49_265060	-3.54725	4.14916e-08
TGME49_273300	1.45392	6.91077e-10	TGME49_314340	3.35311	1.3528e-18	TGME49_222020	-1.17735	4.22046e-08
TGME49_289170	1.43872	6.61188e-38	TGME49_203830	-1.55665	1.43736e-18	TGME49_249600	1.23488	4.2326e-08
TGME49_314550	1.43739	1.4861e-23	TGME49_265810	1.31328	1.81413e-18	TGME49_219820	-1.16811	4.58675e-08
TGME49_295730	1.4276	9.06837e-42	TGME49_249040	4.98827	1.91806e-18	TGME49_220540	1.7199	5.00085e-08
TGME49_266480	1.42661	0.00167067	TGME49_221330	-1.00049	2.05439e-18	TGME49_217790	1.09651	5.35378e-08
TGME49_315345	1.41489	0.00321876	TGME49_285800	1.23575	2.36178e-18	TGME49_306680	2.50952	5.51083e-08
TGME49_267460	1.4088	5.4343e-11	TGME49_300980	1.92271	4.0242e-18	TGME49_226260	1.16561	6.10186e-08
TGME49_245746	1.40205	1.70215e-05	TGME49_230460	2.58235	4.76047e-18	TGME49_308093	-1.261	6.59844e-08
TGME49_255870	1.39842	2.45155e-13	TGME49_285490	-1.2926	6.41922e-18	TGME49_282200	6.53995	6.81407e-08
TGME49_240930	1.39334	2.34534e-14	TGME49_213880	1.1433	6.78571e-18	TGME49_224070	1.12028	7.22812e-08
TGME49_287260	1.38878	3.54161e-21	TGME49_217860	3.96701	7.28138e-18	TGME49_281675	1.25224	8.44919e-08
TGME49_294651	1.38609	8.34157e-05	TGME49_255460	2.49341	1.27482e-17	TGME49_235750	1.25623	8.68288e-08
TGME49_267980	1.3792	4.71965e-36	TGME49_222940	2.42966	1.38389e-17	TGME49_243110	6.69025	8.74207e-08
TGME49_214580	1.37331	3.13279e-61	TGME49_321700	7.56504	1.89672e-17	TGME49_204540	-1.33838	1.09522e-07
TGME49_212760	1.37105	1.72764e-14	TGME49_208830	-1.02726	2.51052e-17	TGME49_319520	3.37231	1.14484e-07
TGME49_255715	1.36788	2.68833e-10	TGME49_229405	2.84039	2.9876e-17	TGME49_298070	1.3559	1.20324e-07
TGME49_315740	1.36494	1.24731e-14	TGME49_248170	2.01046	4.4229e-17	TGME49_289350	1.06351	1.21347e-07
TGME49_265030	1.36376	4.43454e-05	TGME49_311485	3.59187	4.67842e-17	TGME49_263740	1.34821	1.24136e-07
TGME49_281460	1.35651	4.68411e-11	TGME49_298070	1.27596	9.59148e-17	TGME49_225920	-1.2157	1.24404e-07
TGME49_315330	1.35393	0.000107585	TGME49_289720	-1.34189	1.08812e-16	TGME49_209700	-1.03653	1.40514e-07
TGME49_212160	1.35305	2.41873e-16	TGME49_320180	-1.2682	1.2926e-16	TGME49_301150	2.17837	1.42455e-07
TGME49_254330	1.34653	1.71134e-05	TGME49_223855	1.22625	1.44223e-16	TGME49_245770	1.27297	1.45718e-07
TGME49_278245	1.34187	1.86274e-06	TGME49_280470	1.79989	1.59937e-16	TGME49_261660	1.31142	1.48923e-07
TGME49_205210	1.3399	3.09597e-22	TGME49_218192	2.2428	1.83157e-16	TGME49_300790	6.29862	1.62196e-07
TGME49_216830	1.33989	1.77702e-14	TGME49_280465	2.21198	2.29034e-16	TGME49_220585	2.02592	1.63699e-07
TGME49_306510	1.33817	1.21844e-76	TGME49_203290	2.19238	3.36849e-16	TGME49_318330	1.65622	1.84429e-07
TGME49_249510	1.33805	9.77656e-31	TGME49_215550	-1.12347	3.81122e-16	TGME49_217720	1.1406	2.01535e-07
TGME49_293490	1.33684	1.05795e-12	TGME49_241140	1.28671	4.40985e-16	TGME49_210235	3.29641	2.0179e-07
TGME49_318750	1.3363	2.43735e-09	TGME49_305980	-1.26546	6.08292e-16	TGME49_314650	2.6246	2.10309e-07
TGME49_278390	1.336	5.36466e-07	TGME49_203770	3.45057	8.82641e-16	TGME49_239087	1.16205	2.10755e-07
TGME49_216190	1.33558	1.10057e-34	TGME49_228050	4.21644	1.03113e-15	TGME49_277270	-1.29207	2.23692e-07
TGME49_320090	1.33155	1.27111e-28	TGME49_300790	1.60946	1.58979e-15	TGME49_267030	2.77934	2.23891e-07
TGME49_263215	1.32983	1.57143e-23	TGME49_238480	9.84053	1.95999e-15	TGME49_235670	-1.31138	2.27179e-07
TGME49_301150	1.32505	1.77118e-16	TGME49_200250	1.28566	2.12848e-15	TGME49_202050	5.46106	2.36002e-07
TGME49_222420	1.32214	0.00358717	TGME49_286450	-1.20481	2.19522e-15	TGME49_278260	1.18988	2.59504e-07
TGME49_224230	1.31924	1.043e-42	TGME49_222020	-1.56479	2.22757e-15	TGME49_239350	1.10516	2.6559e-07
TGME49_272730	1.31698	2.61504e-08	TGME49_242100	3.4927	2.87756e-15	TGME49_264160	1.34699	2.72148e-07
TGME49_215390	1.3128	2.79529e-08	TGME49_240950	1.32259	3.03952e-15	TGME49_278400	1.26449	2.98266e-07
TGME49_235180	1.31128	0.00172959	TGME49_231920	-1.40613	3.07345e-15	TGME49_266610	6.32772	2.98488e-07
TGME49_288290	1.31052	1.3288e-19	TGME49_270040	-2.07235	3.11922e-15	TGME49_234460	1.03208	3.34317e-07
TGME49_288320	1.30667	8.56625e-08	TGME49_286460	-2.07941	4.85137e-15	TGME49_224830	1.21294	3.46835e-07
TGME49_236990	1.30645	1.09667e-25	TGME49_272290	-1.28062	4.86083e-15	TGME49_221270	-1.20847	3.52201e-07
TGME49_277770	1.3055	1.61443e-49	TGME49_276960	2.30495	5.20222e-15	TGME49_243265	1.00707	3.54973e-07
TGME49_208980	1.3027	1.28032e-07	TGME49_243180	9.73988	5.23101e-15	TGME49_254330	6.23473	3.84415e-07
TGME49_258880	1.30071	3.28627e-09	TGME49_261850	-1.17766	5.75559e-15	TGME49_204880	-1.02217	4.01653e-07
TGME49_318220	1.29773	0.00221697	TGME49_203665	-1.17201	6.24703e-15	TGME49_264175	1.37459	4.58618e-07
TGME49_214420	1.29022	8.28753e-17	TGME49_204000	3.06037	6.76659e-15	TGME49_220520	1.18387	4.61362e-07
TGME49_218390	1.29016	0.000261603	TGME49_214575	-1.74732	8.29933e-15	TGME49_305140	1.07723	4.67312e-07
TGME49_250020	1.28672	2.81243e-07	TGME49_301480	1.62581	8.45293e-15	TGME49_289250	-1.05202	4.76103e-07
TGME49_253760	1.28091	7.93122e-05	TGME49_242770	1.00356	1.06026e-14	TGME49_319312	1.66986	4.86139e-07
TGME49_276810	1.27696	0.000112233	TGME49_292110	1.21355	1.1968e-14	TGME49_202360	1.64102	5.13242e-07
TGME49_234930	1.27611	6.38674e-25	TGME49_278882	1.25899	1.3521e-14	TGME49_243382	6.15396	5.37975e-07
TGME49_240550	1.27174	3.88959e-08	TGME49_290970	2.6263	1.36597e-14	TGME49_227010	-1.58416	5.41618e-07
TGME49_278100	1.27162	1.14507e-08	TGME49_263215	1.78114	2.72745e-14	TGME49_232590	1.01202	5.74495e-07
TGME49_280465	1.26911	0.00047444	TGME49_305120	1.43915	2.77131e-14	TGME49_243970	1.46327	6.208e-07
TGME49_203120	1.26715	4.94726e-21	TGME49_207210	4.13988	6.56302e-14	TGME49_256810	1.47719	6.59993e-07
TGME49_318490	1.26605	6.0644e-12	TGME49_248180	1.26919	7.89479e-14	TGME49_254606	-1.39226	6.67689e-07
TGME49_213720	1.2624	0.0011494	TGME49_254335	1.6191	1.3492e-13	TGME49_315570	-1.81396	6.69708e-07
TGME49_300980	1.25825	3.17911e-18	TGME49_202930	2.2236	1.45338e-13	TGME49_272350	1.29264	6.74218e-07
TGME49_204520	1.25774	4.37802e-25	TGME49_229700	-1.2838	1.96491e-13	TGME49_209755	2.26184	6.76528e-07
TGME49_241710	1.25707	1.25976e-34	TGME49_318880	1.21568	2.02091e-13	TGME49_265170	-1.24972	7.76429e-07
TGME49_247540	1.25416	4.46462e-19	TGME49_315910	1.05563	2.06095e-13	TGME49_224770	6.10349	7.87101e-07
TGME49_236980	1.25309	3.45853e-36	TGME49_315520	2.34013	2.41524e-13	TGME49_259050	-1.3873	8.42772e-07
TGME49_286670	1.25278	0.000391507	TGME49_295950	-1.65109	3.07473e-13	TGME49_201210	1.61071	8.57379e-07
TGME49_246910	1.24789	3.52015e-08	TGME49_203688	3.97712	5.6009e-13	TGME49_213635	1.48003	8.63219e-07
TGME49_291010	1.24657	4.2652e-07	TGME49_223560	1.90042	5.79008e-13	TGME49_307090	5.12817	8.73069e-07
TGME49_208570	1.24331	1.38294e-47	TGME49_252080	-3.56959	6.39567e-13	TGME49_276230	5.91884	9.2704e-07
TGME49_203440	1.23504	3.51646e-07	TGME49_246150	1.18009	1.10323e-12	TGME49_243430	1.05696	9.44686e-07
TGME49_235890	1.23399	9.10794e-05	TGME49_248140	1.34557	1.10389e-12	TGME49_307980	1.48483	1.07335e-06
TGME49_242650	1.22753	8.92151e-07	TGME49_203682	3.80789	1.14248e-12	TGME49_263830	1.76212	1.1483e-06
TGME49_254890	1.22073	3.49816e-18	TGME49_295960	-1.46391	1.48851e-12	TGME49_261560	-2.08397	1.20751e-06
TGME49_233925	1.21357	9.85373e-21	TGME49_240800	2.41613	1.49986e-12	TGME49_239630	-1.04039	1.24314e-06
TGME49_239610	1.21231	4.26228e-17	TGME49_248190	1.24491	1.54705e-12	TGME49_291350	1.05738	1.44647e-06
TGME49_240255	1.21045	1.79198e-10	TGME49_242110	5.56371	1.78066e-12	TGME49_286910	-1.62179	1.49799e-06
TGME49_273915	1.20612	0.00197132	TGME49_293810	1.17957	1.86109e-12	TGME49_245435	1.3555	1.51466e-06
TGME49_316370	1.19846	0.00268282	TGME49_200350	-1.79801	1.8801e-12	TGME49_218192	2.4797	1.5225e-06
TGME49_224250	1.19563	9.84146e-13	TGME49_311740	-1.01692	2.12928e-12	TGME49_319380	3.03395	1.52963e-06
TGME49_217726	1.19418	1.0449e-05	TGME49_301160	1.08077	2.58482e-12	TGME49_306688	1.39401	1.54991e-06
TGME49_297980	1.19287	7.77812e-12	TGME49_230160	-1.71388	2.63748e-12	TGME49_226540	-1.0139	1.6758e-06
TGME49_320525	1.19181	9.28045e-20	TGME49_266670	1.66853	3.84162e-12	TGME49_290580	1.02058	1.716e-06
TGME49_210750	1.19095	8.08468e-16	TGME49_216190	1.43526	3.99922e-12	TGME49_278370	3.57042	1.80703e-06
TGME49_205410	1.18584	2.45929e-12	TGME49_221895	3.79359	4.22213e-12	TGME49_224760	2.7991	1.8138e-06
TGME49_222180	1.18279	2.26637e-26	TGME49_307030	2.35428	6.74359e-12	TGME49_214850	1.11871	1.9116e-06
TGME49_305120	1.18089	3.52286e-17	TGME49_219240	1.1543	7.29684e-12	TGME49_254920	-1.74798	1.94841e-06
TGME49_263340	1.17838	1.4092e-11	TGME49_295662	2.7962	8.37109e-12	TGME49_232475	-1.6087	2.03882e-06
TGME49_286610	1.17607	9.18482e-17	TGME49_236290	3.62658	8.81367e-12	TGME49_225990	-1.22886	2.09991e-06
TGME49_226755	1.17393	5.7054e-20	TGME49_255290	1.02246	1.03807e-11	TGME49_229020	-1.00737	2.21173e-06
TGME49_305490	1.17198	1.60493e-13	TGME49_213430	8.67456	1.20304e-11	TGME49_218955	1.27269	2.27191e-06
TGME49_259580	1.1713	2.5291e-18	TGME49_322100	4.01452	1.75344e-11	TGME49_301480	1.13477	2.36829e-06
TGME49_246030	1.17032	3.16238e-18	TGME49_314080	-1.03363	2.3162e-11	TGME49_245650	-1.41226	2.4127e-06
TGME49_268685	1.1688	9.64301e-15	TGME49_235315	4.7852	2.65388e-11	TGME49_235550	1.46323	2.66755e-06
TGME49_255370	1.1634	2.20138e-18	TGME49_278760	1.40811	2.80898e-11	TGME49_266970	-1.00232	2.70806e-06
TGME49_270630	1.16261	1.71779e-16	TGME49_310250	-1.07022	3.62557e-11	TGME49_249040	6.18802	2.88282e-06
TGME49_263830	1.15964	5.73684e-06	TGME49_279450	1.24017	5.13507e-11	TGME49_270805	1.16171	2.90554e-06
TGME49_318275	1.15835	1.62427e-11	TGME49_204010	3.26542	7.03172e-11	TGME49_225190	1.16234	2.91536e-06
TGME49_245650	1.15776	5.92304e-13	TGME49_257810	8.27682	7.98085e-11	TGME49_286770	-1.322	2.99132e-06
TGME49_329000	1.15617	0.000100725	TGME49_243482	2.42645	8.26524e-11	TGME49_309410	-1.18964	3.01302e-06
TGME49_245770	1.1541	3.01682e-22	TGME49_217740	-1.3736	8.34535e-11	TGME49_312670	1.12196	3.04738e-06
TGME49_223430	1.15297	8.02514e-06	TGME49_240380	-1.12709	8.75815e-11	TGME49_217020	1.23247	3.14924e-06
TGME49_240450	1.15263	3.77976e-18	TGME49_246160	1.39413	9.92713e-11	TGME49_220340	5.82025	3.63093e-06
TGME49_288280	1.15025	2.12118e-11	TGME49_318275	1.06187	1.07145e-10	TGME49_308960	-2.40191	3.78952e-06
TGME49_225105	1.15025	9.18968e-27	TGME49_225990	-1.52111	1.67961e-10	TGME49_266600	5.83386	4.20509e-06
TGME49_234180	1.14939	1.31636e-33	TGME49_241130	1.94244	1.93037e-10	TGME49_264225	5.60619	4.62634e-06
TGME49_243910	1.14917	4.962e-44	TGME49_308965	-2.04336	2.24658e-10	TGME49_313120	1.04791	4.72655e-06
TGME49_221890	1.14902	0.000113302	TGME49_289710	-1.28284	2.51475e-10	TGME49_274170	1.99708	4.76493e-06
TGME49_202255	1.14843	2.40923e-07	TGME49_243110	7.87326	2.53125e-10	TGME49_224800	-1.05592	5.31805e-06
TGME49_300300	1.14526	8.54057e-06	TGME49_217750	-1.45908	2.67687e-10	TGME49_307045	5.51465	5.32861e-06
TGME49_254335	1.14322	6.49997e-05	TGME49_305930	1.12176	2.73585e-10	TGME49_213752	-1.10291	5.37019e-06
TGME49_305630	1.14279	4.46083e-07	TGME49_262825	-1.01636	3.07072e-10	TGME49_284580	1.73957	5.54792e-06
TGME49_239020	1.14181	1.83057e-50	TGME49_231400	3.52859	3.43248e-10	TGME49_244050	1.09239	6.06142e-06
TGME49_271335	1.14158	5.66861e-07	TGME49_298960	2.55857	3.62196e-10	TGME49_306260	-1.10244	6.43387e-06
TGME49_293650	1.14033	9.10751e-17	TGME49_235515	1.87786	3.69104e-10	TGME49_220110	1.15711	6.71952e-06
TGME49_250360	1.14023	2.8099e-20	TGME49_293780	1.49139	5.33096e-10	TGME49_279540	1.62837	6.78125e-06
TGME49_208090	1.13833	4.09615e-07	TGME49_320150	1.43572	7.21876e-10	TGME49_295468	1.25155	6.90982e-06
TGME49_202920	1.13426	2.85123e-42	TGME49_231996	3.44182	7.9273e-10	TGME49_265065	-1.38594	7.36077e-06
TGME49_260310	1.13086	5.0142e-30	TGME49_320200	1.78058	1.18053e-09	TGME49_232040	1.48482	7.67467e-06
TGME49_214780	1.12757	3.34781e-25	TGME49_233540	-1.02019	1.18754e-09	TGME49_243120	5.54874	7.70829e-06
TGME49_217724	1.12601	0.00319763	TGME49_283702	-1.07662	1.89158e-09	TGME49_231996	5.85485	8.5862e-06
TGME49_270920	1.12523	1.00745e-33	TGME49_233140	-1.24654	2.35274e-09	TGME49_306450	1.22636	9.00216e-06
TGME49_262935	1.11253	1.43766e-21	TGME49_238500	6.59626	2.43133e-09	TGME49_262910	-1.07663	9.02678e-06
TGME49_248780	1.10382	2.2238e-09	TGME49_281910	1.45042	2.72966e-09	TGME49_306480	1.32306	9.14251e-06
TGME49_218400	1.10149	2.45946e-16	TGME49_316635	2.17752	2.93197e-09	TGME49_286520	1.24452	9.41013e-06
TGME49_305930	1.09737	3.27892e-18	TGME49_213635	1.77493	3.36652e-09	TGME49_299015	1.70305	9.54696e-06
TGME49_300990	1.09324	9.0736e-24	TGME49_319090	1.11347	3.43483e-09	TGME49_272190	1.33743	1.03771e-05
TGME49_257560	1.08837	1.15638e-36	TGME49_244180	1.32718	7.68031e-09	TGME49_248800	1.04154	1.06819e-05
TGME49_295350	1.0843	2.41237e-11	TGME49_288450	2.71057	7.76483e-09	TGME49_255460	2.48315	1.08616e-05
TGME49_234507	1.08423	2.76214e-05	TGME49_279310	1.9118	8.988e-09	TGME49_211270	1.20289	1.10858e-05
TGME49_273430	1.08169	4.03621e-07	TGME49_295740	2.27782	1.00248e-08	TGME49_210400	4.13699	1.14135e-05
TGME49_254340	1.07858	1.60422e-05	TGME49_301350	2.03041	1.32065e-08	TGME49_278250	1.07659	1.18454e-05
TGME49_265810	1.07568	8.79636e-10	TGME49_311390	1.02444	1.42126e-08	TGME49_244370	-1.00063	1.2587e-05
TGME49_267670	1.07494	9.87096e-29	TGME49_254160	2.64426	1.53541e-08	TGME49_230160	-1.08631	1.28807e-05
TGME49_270700	1.07011	1.17414e-36	TGME49_309330	5.40946	1.72039e-08	TGME49_311905	1.23933	1.39901e-05
TGME49_210482	1.06597	0.00368118	TGME49_263327	1.07377	1.91709e-08	TGME49_217860	2.77282	1.40809e-05
TGME49_243240	1.06456	4.90656e-11	TGME49_252070	-1.23344	2.30221e-08	TGME49_219650	1.12393	1.43206e-05
TGME49_217620	1.06278	5.38864e-12	TGME49_319580	-1.00235	2.37647e-08	TGME49_311260	-1.00353	1.45239e-05
TGME49_234200	1.05867	5.20825e-11	TGME49_278320	6.11688	2.39503e-08	TGME49_294680	1.4671	1.64718e-05
TGME49_250500	1.05555	2.11899e-11	TGME49_320270	2.21745	2.51394e-08	TGME49_268970	5.17065	1.71868e-05
TGME49_255210	1.04608	1.47478e-23	TGME49_224840	1.55787	3.28993e-08	TGME49_207050	5.43516	1.73143e-05
TGME49_309020	1.04245	3.78259e-11	TGME49_259150	2.612	3.34249e-08	TGME49_310290	1.39075	1.73966e-05
TGME49_206680	1.04224	1.52329e-14	TGME49_309990	1.26208	4.56785e-08	TGME49_295390	3.36475	1.74545e-05
TGME49_310090	1.04147	0.000171317	TGME49_308960	2.42632	4.63567e-08	TGME49_301216	1.63772	1.84018e-05
TGME49_223685	1.03566	3.11462e-07	TGME49_288475	2.56027	4.73046e-08	TGME49_263160	2.54251	1.84304e-05
TGME49_292375	1.03467	1.34492e-05	TGME49_217726	1.20819	5.47957e-08	TGME49_290460	1.01325	1.84329e-05
TGME49_297647	1.03369	2.86909e-26	TGME49_251665	2.19348	5.90901e-08	TGME49_243378	5.28219	1.89349e-05
TGME49_215180	1.03225	2.45938e-05	TGME49_250710	-1.3843	6.22546e-08	TGME49_262540	1.13256	1.93375e-05
TGME49_266070	1.03166	5.69571e-09	TGME49_246200	1.1206	7.12862e-08	TGME49_231360	1.81305	2.00526e-05
TGME49_240780	1.03151	4.85241e-13	TGME49_310580	2.24187	7.23903e-08	TGME49_260360	1.17488	2.06633e-05
TGME49_308820	1.0315	4.27856e-09	TGME49_297725	1.71567	7.93986e-08	TGME49_248240	2.83967	2.24715e-05
TGME49_314650	1.02695	2.09219e-08	TGME49_315123	1.67392	8.68448e-08	TGME49_244335	2.25804	2.34269e-05
TGME49_208990	1.02677	1.72068e-16	TGME49_270020	-2.13904	1.07802e-07	TGME49_272440	2.79457	2.38737e-05
TGME49_285800	1.0237	9.17139e-39	TGME49_321490	5.63426	1.21707e-07	TGME49_315900	1.03054	2.55685e-05
TGME49_246670	1.0234	7.51494e-12	TGME49_257755	1.47903	1.23144e-07	TGME49_250220	1.31526	2.60029e-05
TGME49_225070	1.02244	0.00214231	TGME49_257720	2.94204	1.35836e-07	TGME49_292325	1.12325	2.76832e-05
TGME49_281930	1.02091	1.66719e-14	TGME49_265120	6.85757	1.36043e-07	TGME49_248170	1.08149	2.86321e-05
TGME49_315885	1.0206	9.15928e-28	TGME49_267875	1.64539	1.43387e-07	TGME49_329500	3.1726	3.0094e-05
TGME49_288990	1.01797	4.73955e-14	TGME49_318750	1.12347	1.47649e-07	TGME49_256820	1.08584	3.16427e-05
TGME49_257640	1.0174	8.33669e-08	TGME49_275795	6.44142	1.51343e-07	TGME49_249840	1.73785	3.367e-05
TGME49_246750	1.0163	1.97631e-06	TGME49_278080	2.85853	1.67348e-07	TGME49_250710	-1.05543	3.8346e-05
TGME49_249190	1.01505	3.24985e-16	TGME49_245670	-1.04795	1.81697e-07	TGME49_279440	-1.59253	3.83677e-05
TGME49_252230	1.01303	2.74139e-29	TGME49_318220	2.28377	1.90292e-07	TGME49_235720	1.08372	3.89135e-05
TGME49_254860	1.01228	5.92469e-06	TGME49_236670	-1.15481	2.02554e-07	TGME49_297090	5.36735	4.13638e-05
TGME49_210787	1.01175	6.70947e-09	TGME49_314330	1.5631	2.48197e-07	TGME49_263470	-1.02868	4.47838e-05
TGME49_232230	1.01094	3.52735e-13	TGME49_253755	1.6721	2.64526e-07	TGME49_203250	5.51538	4.50836e-05
TGME49_316635	1.00831	4.61969e-05	TGME49_313950	1.63322	2.66549e-07	TGME49_233610	3.30018	4.56208e-05
TGME49_320610	1.00801	2.70753e-15	TGME49_248470	1.17526	2.97402e-07	TGME49_265860	1.40235	4.60996e-05
TGME49_305770	1.00681	4.99667e-25	TGME49_203600	1.28479	3.18325e-07	TGME49_278878	-2.26215	4.93287e-05
TGME49_269175	1.00616	1.50897e-08	TGME49_207970	2.86976	3.55328e-07	TGME49_271033	1.69202	5.12792e-05
TGME49_278230	1.00507	4.20925e-10	TGME49_313650	6.33472	4.87314e-07	TGME49_244220	1.10329	5.19369e-05
TGME49_251660	1.00457	2.84085e-16	TGME49_209755	2.14469	7.00759e-07	TGME49_329000	1.82518	5.31998e-05
TGME49_250900	1.00311	9.09221e-07	TGME49_252640	4.86736	7.35802e-07	TGME49_245530	1.45127	5.51733e-05
TGME49_269800	1.00251	3.24149e-49	TGME49_245752	2.74675	7.65956e-07	TGME49_310510	-2.0173	5.61278e-05
TGME49_263820	1.00074	5.38592e-50	TGME49_266380	1.20224	7.67062e-07	TGME49_306720	2.59961	5.65321e-05
TGME49_218955	-1.00064	2.49192e-12	TGME49_204360	1.44703	8.65752e-07	TGME49_238930	1.32919	5.74038e-05
TGME49_269460	-1.00084	1.12665e-60	TGME49_297150	1.12792	9.73605e-07	TGME49_259030	5.00352	5.78448e-05
TGME49_285425	-1.00136	2.94144e-23	TGME49_207015	5.90547	9.97254e-07	TGME49_257945	4.57659	5.82125e-05
TGME49_315760	-1.00144	1.12183e-30	TGME49_229730	2.32723	1.00143e-06	TGME49_273530	-1.16843	5.83503e-05
TGME49_211720	-1.00165	1.32987e-16	TGME49_245440	2.73355	1.0608e-06	TGME49_215580	-1.87879	6.05091e-05
TGME49_280480	-1.00235	2.27273e-23	TGME49_260830	1.24109	1.24547e-06	TGME49_272300	-1.82616	6.11663e-05
TGME49_232130	-1.0026	6.72934e-97	TGME49_247270	1.03196	1.27157e-06	TGME49_239620	-1.18439	6.26754e-05
TGME49_265650	-1.0073	3.02567e-11	TGME49_222340	1.34989	1.2754e-06	TGME49_247270	1.46637	6.85147e-05
TGME49_232670	-1.00751	8.01362e-56	TGME49_248820	2.93792	1.31821e-06	TGME49_226110	1.53688	7.13921e-05
TGME49_205280	-1.00881	3.64256e-86	TGME49_220560	2.3057	1.41295e-06	TGME49_263110	1.2486	7.22692e-05
TGME49_246950	-1.00969	1.41478e-52	TGME49_202600	5.88671	1.50607e-06	TGME49_269130	-1.30004	7.28416e-05
TGME49_285810	-1.00998	1.04353e-15	TGME49_213700	2.95673	1.53175e-06	TGME49_315802	5.31729	7.32275e-05
TGME49_214970	-1.0102	2.23477e-71	TGME49_238410	-1.1225	1.57516e-06	TGME49_211695	1.63688	7.83717e-05
TGME49_248690	-1.01182	5.28374e-16	TGME49_200240	1.29278	1.60869e-06	TGME49_257360	1.1253	7.93984e-05
TGME49_208030	-1.01209	1.45436e-34	TGME49_267160	1.02247	1.61154e-06	TGME49_311450	1.19276	8.02482e-05
TGME49_258410	-1.01397	1.12509e-25	TGME49_320170	-1.45052	1.88781e-06	TGME49_315123	1.45581	8.19861e-05
TGME49_201630	-1.01408	9.33799e-34	TGME49_301890	1.1597	2.00047e-06	TGME49_242055	1.01473	8.27199e-05
TGME49_291180	-1.01509	1.16055e-31	TGME49_270030	-2.03728	2.24005e-06	TGME49_244728	1.75844	8.37323e-05
TGME49_231215	-1.01516	1.9683e-16	TGME49_278410	2.61203	2.25099e-06	TGME49_308940	1.17009	8.50267e-05
TGME49_259630	-1.01524	7.97544e-22	TGME49_283698	-1.41671	2.36171e-06	TGME49_272900	-1.02131	8.90292e-05
TGME49_221630	-1.01629	1.11898e-34	TGME49_307060	2.26905	2.42886e-06	TGME49_223150	1.05463	9.0049e-05
TGME49_205658	-1.0166	0.00496588	TGME49_237835	1.52795	2.45737e-06	TGME49_306730	2.50964	9.15418e-05
TGME49_295030	-1.01748	1.18783e-42	TGME49_305630	1.33108	2.48224e-06	TGME49_247340	-1.96269	9.38137e-05
TGME49_266300	-1.01774	9.77443e-25	TGME49_284598	1.73906	3.23741e-06	TGME49_277230	-1.08606	9.43781e-05
TGME49_312600	-1.02033	5.54317e-21	TGME49_287960	1.475	3.41555e-06	TGME49_235010	4.95322	9.80402e-05
TGME49_262010	-1.02108	4.86573e-38	TGME49_240325	2.93903	3.64073e-06	TGME49_294650	2.83921	9.95804e-05
TGME49_290970	-1.02312	5.00324e-10	TGME49_306338	1.21186	5.05401e-06	TGME49_208090	1.16708	0.000100614
TGME49_288930	-1.0239	4.06088e-22	TGME49_223900	1.79399	5.15556e-06	TGME49_248750	1.4419	0.000100963
TGME49_301420	-1.02394	1.18328e-37	TGME49_266480	1.96916	5.34688e-06	TGME49_295720	2.32197	0.000101174
TGME49_225690	-1.02404	1.7466e-37	TGME49_207160	5.62776	5.89578e-06	TGME49_204000	3.03053	0.000101985
TGME49_315190	-1.02416	3.83864e-27	TGME49_304920	3.84427	6.70453e-06	TGME49_215900	5.07281	0.00010951
TGME49_320030	-1.0246	1.65418e-33	TGME49_312970	2.41336	9.789e-06	TGME49_310650	1.18304	0.000114101
TGME49_271970	-1.02504	2.10626e-62	TGME49_281660	3.22298	9.87932e-06	TGME49_200340	-3.17694	0.000117289
TGME49_201760	-1.02545	1.84721e-43	TGME49_248240	2.64694	1.05603e-05	TGME49_254160	2.93415	0.000119449
TGME49_315320	-1.02568	1.83435e-58	TGME49_221830	1.88841	1.10022e-05	TGME49_258880	1.16282	0.000121374
TGME49_234430	-1.0263	1.40502e-22	TGME49_307070	2.44733	1.25626e-05	TGME49_220560	4.95594	0.000123429
TGME49_271260	-1.02737	2.99725e-72	TGME49_307590	4.95626	1.64986e-05	TGME49_316635	1.66682	0.000132038
TGME49_228980	-1.02909	5.03333e-06	TGME49_251930	-1.02507	1.73751e-05	TGME49_244940	2.00845	0.000132264
TGME49_233380	-1.03087	1.44532e-105	TGME49_207470	1.31469	1.81362e-05	TGME49_207875	4.88221	0.000132332
TGME49_219500	-1.03188	9.88784e-41	TGME49_329000	1.08928	1.87657e-05	TGME49_254320	3.54217	0.000136749
TGME49_219175	-1.03334	3.2785e-10	TGME49_205530	1.90969	1.8808e-05	TGME49_295662	4.81404	0.000143324
TGME49_312300	-1.03372	2.42282e-28	TGME49_272590	1.46375	2.46966e-05	TGME49_321490	1.0638	0.000147973
TGME49_265320	-1.03521	0.000675399	TGME49_205420	1.70805	2.56536e-05	TGME49_278760	1.3298	0.000150559
TGME49_246760	-1.03525	1.06428e-06	TGME49_248440	-1.43467	3.07655e-05	TGME49_216990	1.50342	0.000155758
TGME49_201785	-1.03635	5.057e-44	TGME49_300300	1.3815	3.32096e-05	TGME49_221455	1.11383	0.00015931
TGME49_270865	-1.03766	2.35454e-45	TGME49_250720	1.75012	3.51999e-05	TGME49_204520	1.08699	0.000171014
TGME49_315160	-1.03813	1.28148e-75	TGME49_217370	5.92879	3.82306e-05	TGME49_272390	-1.05055	0.000173316
TGME49_294790	-1.0382	3.94459e-16	TGME49_266330	4.28208	3.86113e-05	TGME49_245752	2.12229	0.000175537
TGME49_280700	-1.03858	1.81842e-43	TGME49_262970	1.3115	3.97105e-05	TGME49_221890	3.33552	0.000179812
TGME49_262500	-1.03883	7.36338e-22	TGME49_201890	5.01815	4.00643e-05	TGME49_202065	5.94393	0.000179874
TGME49_222660	-1.03914	2.09724e-51	TGME49_257945	1.98627	4.49421e-05	TGME49_252640	4.34706	0.000193248
TGME49_249180	-1.03934	1.05361e-73	TGME49_211080	1.45502	4.51496e-05	TGME49_287430	1.51802	0.000198207
TGME49_225540	-1.03957	1.79347e-13	TGME49_217810	-1.54251	4.79445e-05	TGME49_261510	1.08766	0.00020621
TGME49_249020	-1.03979	4.08844e-15	TGME49_238470	5.23971	4.80952e-05	TGME49_223845	1.26786	0.000210138
TGME49_267450	-1.04176	8.71121e-56	TGME49_274040	2.62344	4.84149e-05	TGME49_290570	1.17809	0.000217354
TGME49_201220	-1.04183	2.6409e-12	TGME49_238200	1.76029	4.99326e-05	TGME49_305130	2.16046	0.000227123
TGME49_243465	-1.04215	1.41077e-32	TGME49_221420	2.15141	5.28456e-05	TGME49_268176	1.04059	0.000237492
TGME49_219320	-1.04226	1.60618e-107	TGME49_278290	6.12419	5.40904e-05	TGME49_249930	-1.31765	0.000241176
TGME49_241155	-1.04508	2.55273e-19	TGME49_320240	3.16936	5.60182e-05	TGME49_203200	1.64572	0.000258342
TGME49_273200	-1.04526	2.89523e-21	TGME49_307790	1.96408	5.72052e-05	TGME49_315520	1.6798	0.000264171
TGME49_229020	-1.04592	6.81291e-47	TGME49_319992	1.97952	5.79468e-05	TGME49_225315	-1.12756	0.000273629
TGME49_203560	-1.0467	2.66384e-26	TGME49_266065	3.43148	6.25772e-05	TGME49_242110	5.03656	0.000289847
TGME49_270800	-1.04728	7.12288e-53	TGME49_315380	5.35379	6.55317e-05	TGME49_255920	-1.17312	0.000296401
TGME49_291880	-1.04773	7.51265e-33	TGME49_288050	4.56747	7.08434e-05	TGME49_259150	4.1122	0.00030184
TGME49_269330	-1.04988	3.74395e-51	TGME49_223845	1.08409	7.17901e-05	TGME49_231880	2.89002	0.000304296
TGME49_232120	-1.05356	2.78684e-51	TGME49_230830	1.00148	8.58604e-05	TGME49_217726	2.56776	0.000341718
TGME49_261850	-1.055	4.26871e-24	TGME49_268020	2.04232	9.70509e-05	TGME49_278340	4.58826	0.000345077
TGME49_206710	-1.05983	5.45373e-30	TGME49_218750	-1.51806	0.000110358	TGME49_273985	1.80752	0.000350269
TGME49_203010	-1.05989	2.54376e-32	TGME49_227630	1.25894	0.000124916	TGME49_321710	4.73882	0.00036402
TGME49_225940	-1.06102	3.6477e-27	TGME49_267470	1.22678	0.000127707	TGME49_215930	-1.54928	0.000366187
TGME49_225860	-1.06265	1.05613e-28	TGME49_291920	4.89961	0.000133049	TGME49_281575	1.22379	0.000370119
TGME49_246485	-1.06303	1.83725e-06	TGME49_225028	2.0277	0.000134657	TGME49_220525	1.92443	0.000377047
TGME49_247690	-1.06339	4.23648e-63	TGME49_228480	-1.45966	0.000140594	TGME49_294805	-3.30402	0.00037748
TGME49_319540	-1.06357	6.83981e-18	TGME49_218890	2.26646	0.000144807	TGME49_213480	1.45043	0.000401431
TGME49_220525	-1.06478	7.84789e-15	TGME49_286932	1.01501	0.000151867	TGME49_228050	4.68008	0.000420441
TGME49_210820	-1.06559	5.58489e-43	TGME49_206660	1.83882	0.000157007	TGME49_217940	-1.3369	0.00042694
TGME49_238420	-1.06564	6.87828e-17	TGME49_225570	-2.67814	0.000160821	TGME49_222080	2.88356	0.000428486
TGME49_217870	-1.06655	1.90629e-41	TGME49_293030	1.59246	0.000175761	TGME49_254255	3.11325	0.000431681
TGME49_262490	-1.06705	1.12127e-61	TGME49_291075	1.88931	0.000177236	TGME49_309300	4.5173	0.000439154
TGME49_226260	-1.06827	1.99842e-36	TGME49_271015	1.32429	0.000180882	TGME49_293490	-1.01399	0.000464096
TGME49_311640	-1.0689	0.00087882	TGME49_233210	1.48043	0.000183049	TGME49_306710	2.78964	0.000473686
TGME49_240090	-1.06891	1.68457e-89	TGME49_311370	3.21223	0.000185829	TGME49_288280	1.03992	0.000474381
TGME49_225020	-1.07053	2.11265e-47	TGME49_240200	1.03309	0.00018798	TGME49_283570	1.52763	0.000487503
TGME49_329800	-1.07087	1.18781e-26	TGME49_259155	2.36055	0.00018855	TGME49_214545	-1.268	0.000500496
TGME49_249570	-1.07093	3.82204e-27	TGME49_316320	3.67756	0.00020328	TGME49_265175	-1.26797	0.000507693
TGME49_268790	-1.07179	8.05325e-42	TGME49_224810	1.09988	0.00021839	TGME49_225070	-1.39656	0.000550954
TGME49_222100	-1.07189	2.88126e-32	TGME49_222420	1.75849	0.000221794	TGME49_270580	1.05289	0.000559887
TGME49_236790	-1.07471	1.46215e-18	TGME49_256650	-1.43763	0.000228637	TGME49_292390	3.69771	0.000579028
TGME49_230820	-1.07576	4.48197e-81	TGME49_238460	4.63213	0.000234342	TGME49_257650	1.30356	0.000596802
TGME49_215450	-1.07604	1.0854e-11	TGME49_294595	1.95744	0.000237656	TGME49_312240	3.24796	0.000599101
TGME49_246930	-1.07971	1.20742e-21	TGME49_206550	1.25712	0.000239175	TGME49_261300	2.70293	0.000617939
TGME49_243920	-1.08044	1.59849e-61	TGME49_220420	1.25692	0.000247385	TGME49_309530	-1.8486	0.000634215
TGME49_271090	-1.08213	1.06713e-25	TGME49_231865	-4.68459	0.000271635	TGME49_276960	1.09454	0.00063751
TGME49_289490	-1.08261	8.24538e-41	TGME49_312240	1.43922	0.000277273	TGME49_240470	-1.62031	0.000666933
TGME49_273320	-1.08265	5.39757e-92	TGME49_221685	1.15064	0.00029273	TGME49_309185	1.19629	0.000667862
TGME49_277950	-1.08267	0.000539975	TGME49_222305	1.13445	0.000357881	TGME49_256800	4.23444	0.000691574
TGME49_311730	-1.0834	0.000304016	TGME49_315370	4.95751	0.000361409	TGME49_278380	2.68653	0.000716578
TGME49_300240	-1.08437	3.10451e-23	TGME49_270655	1.66568	0.000380964	TGME49_310580	1.8835	0.000727318
TGME49_285250	-1.0845	2.43802e-52	TGME49_236230	1.18271	0.000406557	TGME49_209410	1.68911	0.000732422
TGME49_275440	-1.08485	5.72386e-62	TGME49_215055	1.05692	0.000406963	TGME49_223010	-1.02756	0.000753439
TGME49_203200	-1.08566	0.00139043	TGME49_213340	-1.51225	0.000414169	TGME49_289218	4.74548	0.000755343
TGME49_235340	-1.08612	3.90231e-105	TGME49_203200	1.44083	0.000426569	TGME49_310173	-1.60492	0.000774173
TGME49_300220	-1.08661	8.98686e-62	TGME49_283840	1.4489	0.000481116	TGME49_286525	-1.70717	0.000776746
TGME49_297870	-1.08966	2.16196e-32	TGME49_244620	3.2621	0.000481731	TGME49_257925	4.23227	0.000789299
TGME49_264430	-1.09178	3.61925e-06	TGME49_310160	-1.09273	0.000487477	TGME49_320525	1.01231	0.000806203
TGME49_320180	-1.09234	1.66629e-19	TGME49_311300	1.16301	0.00053655	TGME49_310090	1.40209	0.000807153
TGME49_225820	-1.09234	1.04475e-20	TGME49_313210	1.41485	0.000546801	TGME49_218500	2.29186	0.000847537
TGME49_248240	-1.09253	0.000124481	TGME49_253760	1.04654	0.000555552	TGME49_301240	2.63105	0.000863841
TGME49_278850	-1.09495	3.44671e-52	TGME49_202970	1.19721	0.00056332	TGME49_217630	1.15389	0.000874331
TGME49_232030	-1.09531	8.67373e-13	TGME49_313848	1.00066	0.000565708	TGME49_239690	-1.24823	0.000884357
TGME49_253600	-1.09583	4.64508e-53	TGME49_239855	-1.05194	0.00063639	TGME49_233960	3.95564	0.000909178
TGME49_224150	-1.09634	4.0105e-17	TGME49_210478	1.34744	0.000653921	TGME49_253460	-4.23924	0.000949956
TGME49_234340	-1.09764	2.45109e-06	TGME49_320410	-1.33161	0.000680943	TGME49_243220	1.20878	0.000976812
TGME49_270170	-1.099	2.97641e-29	TGME49_217728	1.10815	0.000681127	TGME49_236290	4.33263	0.00101574
TGME49_262920	-1.09912	2.18336e-85	TGME49_215195	1.17287	0.000702806	TGME49_289216	2.29083	0.0010449
TGME49_236960	-1.09927	5.96627e-52	TGME49_240790	3.02936	0.000734553	TGME49_252465	1.05752	0.00107031
TGME49_310005	-1.10094	3.94925e-10	TGME49_288455	1.85158	0.000736756	TGME49_207015	4.1234	0.00107851
TGME49_210345	-1.10361	1.45213e-42	TGME49_238970	2.814	0.00073933	TGME49_226925	2.58766	0.00112162
TGME49_233130	-1.10506	2.38299e-20	TGME49_286465	-2.68143	0.000796508	TGME49_307050	4.04545	0.00113458
TGME49_281960	-1.10679	1.20648e-95	TGME49_262110	-1.84257	0.000805099	TGME49_203770	4.24403	0.00115705
TGME49_225320	-1.10871	8.00789e-27	TGME49_205020	-1.76778	0.000836101	TGME49_227335	-1.01132	0.0012074
TGME49_293730	-1.10956	1.58677e-33	TGME49_278910	2.49192	0.000844593	TGME49_220128	1.31338	0.00124028
TGME49_239795	-1.10971	2.6949e-30	TGME49_235200	3.72325	0.000856719	TGME49_243330	4.57212	0.00127013
TGME49_254870	-1.11016	1.70167e-28	TGME49_240290	1.92073	0.000879358	TGME49_235183	4.21807	0.00127819
TGME49_226860	-1.11058	1.17867e-36	TGME49_235000	1.12446	0.000905884	TGME49_260490	-1.07792	0.0013398
TGME49_271935	-1.11074	3.55119e-27	TGME49_218340	1.39069	0.0009717	TGME49_240575	-1.00754	0.00135639
TGME49_246190	-1.11245	1.0994e-19	TGME49_286250	1.05485	0.00104129	TGME49_294820	1.20436	0.00139455
TGME49_270190	-1.11496	5.76982e-17	TGME49_211370	2.10699	0.00105808	TGME49_205770	4.0101	0.00146258
TGME49_268760	-1.11502	3.43396e-74	TGME49_265290	-1.80787	0.00108107	TGME49_233370	-2.40008	0.00150451
TGME49_270260	-1.11537	3.83333e-20	TGME49_297910	-1.20035	0.00110215	TGME49_259020	2.10468	0.00151355
TGME49_246700	-1.11598	0.000128561	TGME49_248970	-2.32295	0.00120737	TGME49_238480	4.12456	0.00151771
TGME49_213800	-1.11674	3.51627e-45	TGME49_254320	2.52153	0.00122445	TGME49_293020	1.67968	0.0015351
TGME49_309885	-1.11763	3.09244e-17	TGME49_278360	3.78884	0.00127231	TGME49_209180	1.07632	0.00153687
TGME49_253690	-1.11809	3.22051e-50	TGME49_226985	-1.35133	0.00137723	TGME49_249685	1.02605	0.00155181
TGME49_315780	-1.11814	1.50377e-17	TGME49_225370	4.55253	0.00148076	TGME49_273080	3.98459	0.00157072
TGME49_226740	-1.1209	2.31275e-56	TGME49_209485	2.01605	0.00155884	TGME49_459490	2.48518	0.00160507
TGME49_249702	-1.12185	6.85191e-20	TGME49_277705	2.18023	0.00158819	TGME49_306692	4.13561	0.00162385
TGME49_280460	-1.12206	6.3668e-76	TGME49_244030	3.62049	0.00165273	TGME49_307030	1.9135	0.00167842
TGME49_306895	-1.12257	2.79944e-42	TGME49_267490	-1.26765	0.00165383	TGME49_202025	-4.60564	0.00179979
TGME49_226040	-1.12392	1.54979e-25	TGME49_252255	1.12358	0.00172327	TGME49_266670	1.36311	0.00180768
TGME49_286540	-1.12482	2.63681e-06	TGME49_265205	1.70221	0.00176253	TGME49_315450	1.92793	0.00185633
TGME49_230850	-1.12549	1.92042e-41	TGME49_248350	-1.21463	0.00195009	TGME49_233180	1.53847	0.00192782
TGME49_205680	-1.12622	3.31054e-98	TGME49_320105	4.08182	0.00198263	TGME49_265160	-1.36125	0.00196612
TGME49_271770	-1.12624	1.6428e-16	TGME49_235650	1.71305	0.00198656	TGME49_321700	3.62333	0.0020039
TGME49_226710	-1.1266	1.86618e-122	TGME49_267308	3.44533	0.00217389	TGME49_258550	-3.52789	0.00213021
TGME49_293360	-1.12787	4.4665e-49	TGME49_289222	1.85159	0.00217691	TGME49_322110	-3.42036	0.00216996
TGME49_300040	-1.12812	2.46844e-68				TGME49_293850	4.70005	0.00228978
TGME49_252360	-1.12866	1.71983e-35				TGME49_301470	3.27165	0.00232337
TGME49_231160	-1.1288	1.26004e-55				TGME49_307070	4.14521	0.00233863
TGME49_286450	-1.13022	6.24418e-15				TGME49_247648	1.84944	0.00240181
TGME49_248670	-1.13123	8.04253e-111				TGME49_274080	4.23081	0.00242282
TGME49_272650	-1.13263	2.85547e-49				TGME49_243360	2.06612	0.00242698
TGME49_211850	-1.13273	1.18566e-39				TGME49_282000	1.65661	0.00242756
TGME49_243545	-1.13361	9.36564e-29				TGME49_285300	-1.263	0.00243588
TGME49_267370	-1.13391	1.1005e-48				TGME49_291340	4.26734	0.00250197
TGME49_277910	-1.13589	7.90771e-58				TGME49_268220	1.91103	0.00262742
TGME49_254290	-1.1359	2.57031e-12
TGME49_272710	-1.13677	7.06225e-32
TGME49_261370	-1.13703	1.17742e-68
TGME49_318770	-1.13807	9.61306e-32
TGME49_218362	-1.14175	5.4011e-29
TGME49_270975	-1.14194	1.2997e-25
TGME49_272640	-1.14377	9.43966e-51
TGME49_306490	-1.14432	1.03021e-58
TGME49_313760	-1.14661	2.91039e-94
TGME49_315580	-1.14739	5.50436e-46
TGME49_243930	-1.14864	6.88944e-90
TGME49_212980	-1.14904	3.62053e-149
TGME49_308840	-1.15029	4.48749e-22
TGME49_319860	-1.1518	5.85042e-53
TGME49_237190	-1.15217	6.12403e-57
TGME49_273310	-1.15416	2.61622e-51
TGME49_245640	-1.15508	9.25582e-78
TGME49_269730	-1.15586	3.68879e-63
TGME49_277270	-1.1561	7.96751e-36
TGME49_239300	-1.1577	6.29698e-22
TGME49_270350	-1.15814	6.46602e-63
TGME49_249300	-1.15863	4.58781e-76
TGME49_319350	-1.15913	6.10605e-77
TGME49_216460	-1.15923	3.63573e-40
TGME49_225340	-1.15992	1.71051e-40
TGME49_254630	-1.16008	6.22784e-47
TGME49_211000	-1.16241	0.00445469
TGME49_246720	-1.16279	1.11143e-75
TGME49_225315	-1.16326	2.75429e-05
TGME49_203790	-1.16399	5.31068e-25
TGME49_266320	-1.1649	4.48238e-39
TGME49_231000	-1.16603	1.56418e-28
TGME49_257470	-1.16813	1.13863e-50
TGME49_253940	-1.16828	2.53953e-63
TGME49_294640	-1.16852	2.83299e-66
TGME49_232410	-1.16947	5.75396e-42
TGME49_222330	-1.1701	2.24751e-20
TGME49_243430	-1.17421	1.0065e-78
TGME49_293430	-1.17457	8.96003e-50
TGME49_278780	-1.17471	6.06028e-34
TGME49_203175	-1.17564	1.9432e-06
TGME49_246710	-1.17699	5.48751e-16
TGME49_273860	-1.17775	2.90704e-49
TGME49_249725	-1.17871	5.79739e-09
TGME49_261990	-1.17953	1.42631e-25
TGME49_261440	-1.18346	2.50833e-94
TGME49_272290	-1.18405	1.39876e-30
TGME49_316400	-1.18461	1.44499e-44
TGME49_202390	-1.18572	5.27777e-46
TGME49_239560	-1.18586	1.40767e-13
TGME49_289590	-1.18691	0.0010815
TGME49_260540	-1.18759	8.22617e-97
TGME49_201215	-1.18768	0.000108439
TGME49_316540	-1.18779	9.76177e-33
TGME49_241010	-1.18797	2.79505e-67
TGME49_249440	-1.18803	3.32988e-68
TGME49_209200	-1.18979	3.42491e-57
TGME49_265770	-1.19147	1.52533e-49
TGME49_236860	-1.1944	4.30468e-39
TGME49_215580	-1.19469	3.31666e-18
TGME49_310740	-1.19623	9.8205e-17
TGME49_278130	-1.19681	1.03113e-44
TGME49_264850	-1.19683	0.000103591
TGME49_258470	-1.19686	9.26475e-46
TGME49_286595	-1.19799	4.62813e-29
TGME49_220025	-1.1984	4.19944e-05
TGME49_244470	-1.201	9.16792e-76
TGME49_243250	-1.20105	3.11948e-52
TGME49_231630	-1.20453	5.84128e-63
TGME49_278600	-1.20467	3.06709e-40
TGME49_245550	-1.20771	1.27467e-16
TGME49_314500	-1.21036	4.60695e-63
TGME49_202420	-1.21083	3.73614e-27
TGME49_220460	-1.21127	2.84665e-09
TGME49_265780	-1.21282	3.42893e-30
TGME49_223880	-1.21532	2.61315e-44
TGME49_253140	-1.21685	1.35308e-37
TGME49_322010	-1.21798	2.38262e-13
TGME49_221400	-1.21829	3.24668e-57
TGME49_220270	-1.21861	6.0509e-96
TGME49_315470	-1.22065	1.86926e-91
TGME49_246940	-1.22153	8.22094e-43
TGME49_243690	-1.22244	1.2593e-50
TGME49_217961	-1.22367	6.89599e-13
TGME49_204880	-1.22411	2.41054e-62
TGME49_218520	-1.22447	4.12191e-79
TGME49_209000	-1.22705	5.37184e-34
TGME49_213570	-1.22878	9.94054e-73
TGME49_244720	-1.22978	5.89359e-25
TGME49_216000	-1.23145	2.90022e-74
TGME49_315750	-1.23211	4.01443e-30
TGME49_309100	-1.23222	1.0113e-37
TGME49_282210	-1.23318	2.18698e-61
TGME49_231420	-1.23541	0.00151337
TGME49_310885	-1.23547	3.40008e-32
TGME49_294560	-1.236	6.60549e-44
TGME49_288030	-1.23753	1.88066e-37
TGME49_277055	-1.23984	2.38343e-07
TGME49_268590	-1.24045	8.07788e-58
TGME49_278975	-1.24329	4.23388e-42
TGME49_240247	-1.2449	2.35943e-06
TGME49_305030	-1.2459	7.22672e-49
TGME49_220440	-1.24759	1.66796e-14
TGME49_255390	-1.24773	8.43525e-22
TGME49_240730	-1.24941	7.92333e-17
TGME49_233030	-1.25037	1.31373e-38
TGME49_222930	-1.25051	7.66266e-76
TGME49_289370	-1.25076	1.21924e-25
TGME49_205490	-1.25103	4.72811e-117
TGME49_219070	-1.25221	4.92056e-62
TGME49_315770	-1.25343	9.92689e-94
TGME49_314490	-1.25578	1.52416e-24
TGME49_314700	-1.25589	1.8994e-75
TGME49_244280	-1.2577	6.6374e-43
TGME49_265065	-1.25778	3.26493e-05
TGME49_249980	-1.25868	0.000147106
TGME49_252990	-1.26034	3.79729e-15
TGME49_267500	-1.26102	9.6438e-55
TGME49_289910	-1.26119	2.43137e-49
TGME49_297180	-1.26128	1.70894e-99
TGME49_224890	-1.26151	1.97809e-47
TGME49_250690	-1.26159	1.56103e-73
TGME49_229140	-1.2657	3.41661e-07
TGME49_201230	-1.2671	2.8487e-63
TGME49_229500	-1.26757	1.11832e-34
TGME49_224140	-1.26813	0.00159497
TGME49_310900	-1.26877	6.33246e-67
TGME49_312950	-1.26953	1.01793e-60
TGME49_208400	-1.27124	1.5218e-40
TGME49_215150	-1.27127	5.77202e-77
TGME49_306370	-1.27189	6.5446e-17
TGME49_267070	-1.27309	1.14931e-74
TGME49_230970	-1.27338	3.69405e-21
TGME49_218880	-1.27494	3.4348e-51
TGME49_235130	-1.27557	6.97658e-40
TGME49_263850	-1.27592	2.83789e-37
TGME49_285930	-1.27699	3.95498e-34
TGME49_217940	-1.27762	1.43729e-09
TGME49_205530	-1.27876	0.00341761
TGME49_210420	-1.27884	2.62273e-36
TGME49_247195	-1.27885	2.52916e-69
TGME49_253130	-1.27947	1.36488e-75
TGME49_202500	-1.27996	1.26956e-110
TGME49_222440	-1.27996	0.000227791
TGME49_264980	-1.28122	5.85755e-35
TGME49_238380	-1.28178	1.59945e-161
TGME49_321600	-1.28182	1.29077e-95
TGME49_269885	-1.28184	1.01347e-50
TGME49_253880	-1.28256	1.18558e-46
TGME49_245540	-1.28277	8.04898e-17
TGME49_211650	-1.28333	1.88357e-49
TGME49_314080	-1.28504	1.0522e-140
TGME49_263590	-1.28526	1.96e-20
TGME49_205670	-1.28746	1.46051e-71
TGME49_258360	-1.28783	1.22619e-61
TGME49_227000	-1.28837	5.9906e-94
TGME49_205330	-1.28882	8.7363e-56
TGME49_262933	-1.28907	2.1906e-36
TGME49_217520	-1.29111	8.67451e-54
TGME49_312930	-1.29222	5.69219e-05
TGME49_313480	-1.29308	2.57745e-57
TGME49_315500	-1.29396	9.5556e-50
TGME49_256060	-1.29578	4.56677e-17
TGME49_299780	-1.29637	3.60147e-157
TGME49_232020	-1.2989	5.66326e-65
TGME49_227380	-1.29896	1.02941e-89
TGME49_294340	-1.29901	5.77975e-62
TGME49_211260	-1.29917	1.00378e-115
TGME49_234350	-1.30007	2.79704e-40
TGME49_285650	-1.30266	1.82496e-62
TGME49_233760	-1.3032	1.32566e-20
TGME49_225280	-1.30339	0.000362009
TGME49_225210	-1.30406	4.24825e-31
TGME49_305510	-1.30406	2.02813e-43
TGME49_266435	-1.30639	1.56291e-30
TGME49_319600	-1.30702	7.52974e-49
TGME49_232250	-1.30784	2.68939e-57
TGME49_311770	-1.30826	2.44227e-54
TGME49_322000	-1.31011	1.76101e-21
TGME49_201170	-1.31068	3.2946e-41
TGME49_261300	-1.31251	6.95207e-14
TGME49_253100	-1.31281	3.3233e-63
TGME49_237090	-1.31729	1.05391e-59
TGME49_221620	-1.31852	8.65485e-47
TGME49_247400	-1.3189	1.91565e-55
TGME49_218240	-1.31957	1.51133e-96
TGME49_215530	-1.31967	2.63847e-34
TGME49_212270	-1.32558	1.7048e-64
TGME49_224530	-1.32702	8.86474e-92
TGME49_308010	-1.3275	1.45111e-102
TGME49_312100	-1.32792	2.61156e-63
TGME49_295620	-1.32972	1.5382e-148
TGME49_282055	-1.33068	5.40193e-81
TGME49_256030	-1.33134	7.92881e-80
TGME49_311230	-1.33294	6.72388e-67
TGME49_266630	-1.33564	3.83832e-71
TGME49_239800	-1.33797	5.26682e-82
TGME49_244710	-1.34001	3.58992e-21
TGME49_278030	-1.3411	8.65176e-69
TGME49_319710	-1.3415	3.41614e-38
TGME49_206510	-1.3428	4.60861e-101
TGME49_260825	-1.34684	2.40096e-22
TGME49_262950	-1.34874	1.58184e-92
TGME49_218720	-1.34926	1.38797e-83
TGME49_271270	-1.35082	7.31466e-104
TGME49_312580	-1.35113	6.27073e-64
TGME49_216820	-1.35235	4.29736e-174
TGME49_248740	-1.35316	6.88736e-15
TGME49_203830	-1.35535	5.06645e-27
TGME49_227810	-1.35591	7.52047e-56
TGME49_201860	-1.36059	9.50754e-26
TGME49_203930	-1.36154	9.10343e-89
TGME49_244250	-1.36179	1.73633e-174
TGME49_315210	-1.36352	6.66363e-81
TGME49_223790	-1.36396	1.6792e-119
TGME49_229260	-1.36417	6.23717e-76
TGME49_288045	-1.365	6.25065e-30
TGME49_262970	-1.36508	2.36548e-13
TGME49_268765	-1.36694	5.95458e-05
TGME49_260820	-1.36695	4.76193e-33
TGME49_237195	-1.36738	3.64651e-40
TGME49_237820	-1.36765	4.04506e-64
TGME49_240410	-1.36788	6.91891e-19
TGME49_238150	-1.37018	2.48029e-71
TGME49_236050	-1.37194	5.36657e-40
TGME49_251740	-1.37342	2.34784e-63
TGME49_272645	-1.37412	6.11914e-17
TGME49_252200	-1.37421	4.75867e-73
TGME49_271780	-1.37428	5.36963e-35
TGME49_268680	-1.37603	6.61929e-80
TGME49_237170	-1.37643	0.000835447
TGME49_289630	-1.37761	2.93209e-61
TGME49_297960	-1.37856	5.0015e-139
TGME49_318470	-1.37899	1.24162e-54
TGME49_231640	-1.38003	2.5959e-101
TGME49_286500	-1.38588	3.25922e-29
TGME49_244940	-1.38662	1.10839e-05
TGME49_305590	-1.38864	5.1959e-87
TGME49_255700	-1.38966	1.94781e-63
TGME49_244715	-1.3947	0.000104494
TGME49_248445	-1.39584	8.66402e-39
TGME49_227952	-1.39701	1.49364e-85
TGME49_282070	-1.40171	1.47837e-82
TGME49_218550	-1.40254	1.42158e-123
TGME49_311800	-1.40262	6.34842e-52
TGME49_310620	-1.40323	3.52817e-59
TGME49_206460	-1.40407	1.86769e-16
TGME49_236850	-1.40439	6.37216e-53
TGME49_228230	-1.4044	2.48725e-149
TGME49_255190	-1.40518	4.32477e-108
TGME49_217360	-1.40638	1.3459e-60
TGME49_276130	-1.40782	9.05424e-56
TGME49_315510	-1.40785	1.6576e-60
TGME49_270510	-1.40867	2.316e-73
TGME49_239830	-1.41007	2.32132e-71
TGME49_246450	-1.41382	2.67107e-64
TGME49_310010	-1.41541	1.21554e-126
TGME49_258660	-1.41556	8.78477e-140
TGME49_201240	-1.41563	7.00593e-26
TGME49_277730	-1.4162	2.37698e-26
TGME49_296015	-1.41629	9.56751e-40
TGME49_285990	-1.41707	6.82123e-21
TGME49_229930	-1.41897	2.7002e-31
TGME49_261955	-1.41946	2.63708e-57
TGME49_220370	-1.42214	2.79617e-47
TGME49_312150	-1.42259	2.14223e-141
TGME49_235690	-1.42345	7.96785e-53
TGME49_261750	-1.42498	1.32227e-93
TGME49_250115	-1.42621	2.62633e-53
TGME49_295360	-1.42698	2.37663e-53
TGME49_273560	-1.42702	5.5403e-70
TGME49_316280	-1.42864	4.00234e-65
TGME49_247520	-1.43401	1.21603e-104
TGME49_299790	-1.43428	2.88777e-35
TGME49_308860	-1.43579	1.40975e-243
TGME49_234540	-1.4361	4.57743e-49
TGME49_261560	-1.43644	3.89513e-06
TGME49_200385	-1.43722	1.34715e-40
TGME49_279420	-1.4386	1.23783e-106
TGME49_314695	-1.43879	1.81043e-30
TGME49_260580	-1.43879	1.37051e-81
TGME49_241000	-1.44035	1.12861e-62
TGME49_272285	-1.44262	0.000240945
TGME49_291890	-1.44262	1.29035e-101
TGME49_289620	-1.44391	1.66011e-150
TGME49_208910	-1.44392	1.34483e-36
TGME49_215550	-1.44506	3.12366e-32
TGME49_277740	-1.44581	6.94744e-164
TGME49_221370	-1.44887	1.26393e-45
TGME49_287970	-1.44945	3.31642e-90
TGME49_258090	-1.45062	4.90796e-92
TGME49_237210	-1.45183	8.83139e-63
TGME49_265080	-1.45271	4.65435e-73
TGME49_308810	-1.45347	8.13878e-117
TGME49_221990	-1.45558	4.25333e-107
TGME49_266970	-1.4562	1.10232e-11
TGME49_213920	-1.45704	7.43815e-95
TGME49_230180	-1.4572	8.46655e-79
TGME49_311710	-1.45886	3.04701e-07
TGME49_204530	-1.45905	1.82886e-17
TGME49_242860	-1.46131	7.05803e-67
TGME49_224880	-1.46146	1.375e-32
TGME49_315220	-1.46165	7.13752e-111
TGME49_249340	-1.46573	7.53137e-171
TGME49_238410	-1.46634	4.95646e-33
TGME49_224000	-1.46659	5.09057e-85
TGME49_257550	-1.46905	4.81999e-126
TGME49_246763	-1.46957	0.00165742
TGME49_230340	-1.46983	1.1912e-96
TGME49_283510	-1.47046	1.86614e-132
TGME49_271000	-1.47067	1.5454e-66
TGME49_293520	-1.47204	3.05343e-10
TGME49_264420	-1.47416	6.52216e-19
TGME49_310240	-1.47607	1.11899e-86
TGME49_268870	-1.47676	3.06587e-93
TGME49_291050	-1.47742	1.99089e-102
TGME49_316260	-1.47749	2.72511e-140
TGME49_247950	-1.47771	0.000182079
TGME49_294690	-1.47908	1.25831e-126
TGME49_300360	-1.48014	1.03342e-16
TGME49_223985	-1.48267	2.39818e-73
TGME49_312270	-1.48399	2.55633e-191
TGME49_305250	-1.48404	6.54329e-144
TGME49_202200	-1.48655	1.15627e-147
TGME49_316290	-1.48751	6.30717e-52
TGME49_266090	-1.4893	5.96352e-66
TGME49_220930	-1.49318	2.41735e-121
TGME49_246995	-1.50065	0.000980872
TGME49_231070	-1.50093	4.16311e-145
TGME49_283540	-1.50128	1.24356e-103
TGME49_220900	-1.5055	2.46282e-219
TGME49_230210	-1.50598	6.66822e-171
TGME49_240380	-1.5096	9.49431e-67
TGME49_234950	-1.51183	1.65073e-76
TGME49_255450	-1.51473	1.4801e-200
TGME49_221180	-1.51519	3.44708e-201
TGME49_263200	-1.52326	2.00352e-61
TGME49_234270	-1.52468	9.18295e-96
TGME49_289600	-1.52476	1.28309e-25
TGME49_265790	-1.52493	3.68406e-121
TGME49_310220	-1.52495	1.35736e-81
TGME49_313380	-1.52563	1.36002e-82
TGME49_286460	-1.52578	1.38409e-20
TGME49_218270	-1.52618	1.10629e-68
TGME49_316340	-1.52796	1.06228e-88
TGME49_262630	-1.5326	6.55424e-14
TGME49_237180	-1.53436	5.7963e-72
TGME49_321650	-1.53637	4.3556e-104
TGME49_294680	-1.53645	5.13216e-46
TGME49_267620	-1.53892	8.03322e-92
TGME49_319900	-1.53931	1.64305e-77
TGME49_309160	-1.54861	2.10076e-28
TGME49_277720	-1.55121	1.30157e-107
TGME49_203300	-1.55619	2.65978e-138
TGME49_244500	-1.56409	8.68698e-96
TGME49_254880	-1.56614	5.93454e-113
TGME49_216620	-1.56899	2.07961e-56
TGME49_264990	-1.56919	2.41934e-62
TGME49_214880	-1.56969	6.6901e-161
TGME49_269340	-1.5703	6.11671e-154
TGME49_240575	-1.57449	2.80768e-08
TGME49_226690	-1.57493	1.51118e-126
TGME49_224130	-1.58138	1.38961e-54
TGME49_200375	-1.58151	7.33038e-38
TGME49_242320	-1.59055	2.29127e-61
TGME49_286590	-1.59345	8.16108e-161
TGME49_285140	-1.59544	4.50238e-39
TGME49_310235	-1.59875	1.21756e-87
TGME49_310450	-1.59905	6.23331e-160
TGME49_305270	-1.60086	1.41975e-132
TGME49_203815	-1.60359	1.34113e-05
TGME49_294610	-1.60687	3.30935e-108
TGME49_209040	-1.60734	5.89928e-32
TGME49_240470	-1.60829	0.000330362
TGME49_201520	-1.60931	1.24795e-46
TGME49_311470	-1.61078	1.78785e-206
TGME49_224700	-1.61251	6.74807e-91
TGME49_308096	-1.61548	6.6007e-14
TGME49_297400	-1.61683	6.06839e-138
TGME49_258700	-1.6169	3.45934e-139
TGME49_300100	-1.62256	5.15831e-218
TGME49_254070	-1.62324	1.10446e-114
TGME49_234260	-1.62445	3.00711e-06
TGME49_265542	-1.62969	4.07879e-08
TGME49_253380	-1.63181	1.00758e-80
TGME49_238170	-1.632	1.07661e-57
TGME49_313940	-1.63265	3.30038e-10
TGME49_230350	-1.63428	1.92744e-190
TGME49_225200	-1.64397	2.0632e-147
TGME49_309930	-1.65188	6.26614e-26
TGME49_223920	-1.6519	1.60675e-142
TGME49_263520	-1.65394	3.62726e-97
TGME49_236060	-1.65851	9.886e-86
TGME49_235370	-1.65867	2.2188e-173
TGME49_205050	-1.65882	1.10924e-16
TGME49_212770	-1.6616	2.00211e-171
TGME49_253710	-1.66405	9.0892e-09
TGME49_250840	-1.67518	1.23668e-109
TGME49_297120	-1.67651	1.80807e-90
TGME49_244080	-1.67721	7.85689e-55
TGME49_208340	-1.6793	1.7572e-116
TGME49_300090	-1.68047	9.26363e-32
TGME49_239780	-1.68131	4.06648e-60
TGME49_271930	-1.68136	1.35539e-30
TGME49_217700	-1.68932	2.63163e-41
TGME49_225330	-1.70127	3.43819e-76
TGME49_213340	-1.70183	5.8337e-10
TGME49_203705	-1.70269	1.72173e-08
TGME49_320515	-1.70605	3.56344e-138
TGME49_310230	-1.71244	1.30741e-71
TGME49_250820	-1.71617	5.32675e-194
TGME49_226220	-1.72022	3.87671e-103
TGME49_313780	-1.72387	6.24334e-168
TGME49_320190	-1.72555	2.15756e-42
TGME49_299800	-1.73039	0.000416711
TGME49_295100	-1.73336	0
TGME49_224520	-1.73519	4.93224e-120
TGME49_211280	-1.73539	3.69429e-07
TGME49_309030	-1.73898	0.00077158
TGME49_265420	-1.7413	5.28804e-166
TGME49_247220	-1.74417	5.66477e-157
TGME49_295945	-1.7457	0.000284807
TGME49_313475	-1.75005	6.66574e-08
TGME49_265230	-1.75023	5.03215e-39
TGME49_289160	-1.76213	1.08553e-36
TGME49_280770	-1.76544	1.13941e-177
TGME49_267990	-1.76839	0.00445003
TGME49_297070	-1.77034	7.27377e-218
TGME49_244070	-1.77064	4.10142e-45
TGME49_315490	-1.77945	1.90333e-307
TGME49_224540	-1.78011	2.72752e-88
TGME49_291170	-1.78601	8.65415e-12
TGME49_243200	-1.78994	0
TGME49_206690	-1.79623	8.24161e-88
TGME49_267610	-1.81068	4.41182e-12
TGME49_275610	-1.81167	3.78446e-120
TGME49_216710	-1.81435	1.91508e-07
TGME49_206430	-1.8148	6.96715e-53
TGME49_269860	-1.81917	0.00244444
TGME49_257430	-1.82478	7.10895e-154
TGME49_320080	-1.82619	4.58176e-137
TGME49_280670	-1.83014	5.76333e-141
TGME49_263560	-1.83028	1.5455e-143
TGME49_208740	-1.83256	1.79264e-133
TGME49_270030	-1.83883	2.19585e-06
TGME49_275460	-1.84304	1.4273e-105
TGME49_239855	-1.84412	0.000450911
TGME49_315495	-1.84703	4.48747e-118
TGME49_306350	-1.84719	9.04142e-80
TGME49_209250	-1.84816	8.28104e-152
TGME49_231960	-1.85846	8.0621e-146
TGME49_228680	-1.86509	2.05726e-05
TGME49_231230	-1.86734	5.86644e-07
TGME49_289710	-1.87649	1.81679e-83
TGME49_219110	-1.88183	2.84741e-06
TGME49_241165	-1.89022	1.46064e-05
TGME49_315610	-1.8942	1.38525e-184
TGME49_212780	-1.90037	1.01023e-179
TGME49_205265	-1.90191	5.23893e-35
TGME49_225560	-1.90583	2.00582e-228
TGME49_232560	-1.90908	1.30227e-165
TGME49_309590	-1.91299	4.57893e-160
TGME49_295960	-1.91424	2.59425e-134
TGME49_244660	-1.91551	8.12052e-52
TGME49_219450	-1.92074	1.25889e-07
TGME49_236670	-1.93163	2.6328e-28
TGME49_282000	-1.93205	4.27021e-16
TGME49_262730	-1.93561	3.22864e-213
TGME49_306060	-1.93942	4.67053e-90
TGME49_289150	-1.94198	9.5739e-131
TGME49_230160	-1.96026	1.43724e-46
TGME49_308960	-1.96319	1.07463e-08
TGME49_203070	-1.96449	2.61828e-05
TGME49_206695	-1.96901	8.0613e-57
TGME49_293170	-1.97688	9.27338e-129
TGME49_221250	-1.99957	6.18893e-269
TGME49_270240	-2.0029	8.44405e-236
TGME49_215955	-2.01404	0.000494113
TGME49_258580	-2.01499	0
TGME49_308075	-2.01524	3.64725e-169
TGME49_205360	-2.02071	1.11864e-116
TGME49_239770	-2.02741	1.48197e-77
TGME49_208380	-2.02772	1.92275e-08
TGME49_308093	-2.0426	1.27078e-88
TGME49_228175	-2.04399	6.20298e-12
TGME49_286580	-2.05928	1.31514e-234
TGME49_227370	-2.06979	1.10073e-07
TGME49_316500	-2.06981	0.00238482
TGME49_249230	-2.07096	0.000230115
TGME49_297410	-2.07337	1.09288e-09
TGME49_308965	-2.0848	7.67512e-25
TGME49_297910	-2.11036	1.34597e-16
TGME49_243420	-2.11196	3.40443e-15
TGME49_295125	-2.12291	1.24883e-73
TGME49_285870	-2.13753	1.03322e-111
TGME49_289720	-2.14962	1.60822e-49
TGME49_291960	-2.15099	2.11736e-295
TGME49_295950	-2.17419	2.74964e-92
TGME49_207665	-2.1751	3.89672e-16
TGME49_310455	-2.18656	5.20309e-13
TGME49_277250	-2.19716	2.55098e-06
TGME49_308090	-2.20586	1.01265e-143
TGME49_270040	-2.21135	1.06673e-09
TGME49_285920	-2.21291	0.000182551
TGME49_262110	-2.22188	2.53701e-06
TGME49_250710	-2.23089	1.02598e-19
TGME49_248425	-2.24375	0.000700564
TGME49_211290	-2.25485	2.6384e-72
TGME49_292935	-2.26864	1.91225e-06
TGME49_261740	-2.27638	1.19953e-130
TGME49_295110	-2.29138	0
TGME49_293760	-2.29633	4.81845e-246
TGME49_205250	-2.30268	1.76419e-280
TGME49_253120	-2.31283	4.77815e-25
TGME49_266860	-2.31351	5.53355e-09
TGME49_234940	-2.33003	2.46677e-37
TGME49_252260	-2.37592	1.95855e-05
TGME49_297395	-2.38544	2.09702e-19
TGME49_207150	-2.39712	0.00200791
TGME49_212275	-2.40066	7.62007e-08
TGME49_229010	-2.40954	0
TGME49_293850	-2.41942	0.00467037
TGME49_224170	-2.43968	0.000965453
TGME49_203890	-2.48558	3.3927e-08
TGME49_252080	-2.4933	3.42422e-07
TGME49_278580	-2.49646	4.82628e-06
TGME49_285300	-2.51352	3.82774e-12
TGME49_206440	-2.53029	1.16287e-09
TGME49_320170	-2.57972	5.17933e-15
TGME49_244260	-2.61806	6.51784e-10
TGME49_277265	-2.64615	0.000450521
TGME49_268220	-2.64859	2.77268e-20
TGME49_243470	-2.7642	0.0013532
TGME49_212180	-2.78649	4.29375e-05
TGME49_201850	-2.80869	0.000249413
TGME49_209810	-2.85505	0.000822091
TGME49_207160	-2.87211	7.85648e-09
TGME49_295105	-2.87353	1.64793e-300
TGME49_315100	-2.95356	1.25312e-05
TGME49_209755	-3.00363	0.000291878
TGME49_315480	-3.02632	3.44525e-05
TGME49_220280	-3.23906	0.00051801
TGME49_218740	-3.3319	5.10818e-73
TGME49_319890	-3.38849	8.18049e-08
TGME49_258550	-3.52506	2.01058e-95
TGME49_232420	-3.5681	9.54763e-07
TGME49_310173	-3.62545	2.71997e-06
TGME49_260190	-3.67601	3.44306e-170
TGME49_219828	-3.71716	0.000684821
TGME49_235390	-3.76822	0.000137448
TGME49_272510	-4.20723	0.00241075
TGME49_259270	-4.26984	3.93999e-09
TGME49_280570	-4.38492	2.11897e-06
TGME49_205662	-4.40407	0.00106362
TGME49_257460	-4.47749	0.00201164
TGME49_316190	-4.59822	0.00132809
TGME49_296020	-4.69832	0.00247243
TGME49_294210	-4.78144	0.00160504
TGME49_293890	-4.89492	0.00115701
TGME49_253330	-5.22481	1.10589e-133
TGME49_228220	-5.25658	0.00142822
TGME49_286465	-5.32829	4.59205e-05
TGME49_275590	-5.38077	0.000216932
TGME49_289040	-5.48847	0.000166576
