# Supplementary material for: AP2XII-1 and AP2XI-2 Suppress Schizogony Gene Expression in Toxoplasma gondii
Source: Int J Mol Sci. 2024 May 18;25(10):5527. doi: 10.3390/ijms25105527 (PMC11122372; doi:10.3390/ijms25105527)
Supplement: Supplementary file 1 [file ijms-25-05527-s001.zip › Table S4.xlsx]

## Sheet: Sheet1
Table S4: DEG analysis for T. gondii tachyzoite after AP2XI-2 knockdown. Gene transcription level is represented by transcripts per million (TPM). Gene features were presented according to its annotation in ToxoDB. AP2XI-2-J and AP2XI-2-H represents DEGs after AP2XI-2 knockdown generated in this study, and Antunes et al., 2023, Biorxiv, respectively.
AP2XI-2-J			AP2XI-2-H
ID	log2FoldChange	pvalue	ID	log2FoldChange	pvalue
TGME49_296640	9.58824	4.67308e-58	TGME49_243940	5.99227	1.06755e-82
TGME49_207005	9.42765	1.00288e-92	TGME49_201180	4.39789	5.99543e-76
TGME49_207015	9.21023	3.02271e-32	TGME49_253790	2.69594	1.40417e-62
TGME49_207010	8.67283	1.76231e-34	TGME49_262050	-4.74395	3.77582e-57
TGME49_315380	8.52124	1.03784e-09	TGME49_305790	2.76043	1.21436e-44
TGME49_278430	8.49365	8.38525e-41	TGME49_273980	2.92394	1.87044e-43
TGME49_251962	7.76279	2.25396e-10	TGME49_318525	1.79292	1.1635e-40
TGME49_238470	7.58048	2.32406e-06	TGME49_286020	3.96177	8.67123e-40
TGME49_257925	7.30469	1.69311e-11	TGME49_232400	4.71343	2.93454e-39
TGME49_243110	7.10238	7.1558e-07	TGME49_270690	2.83817	3.60821e-39
TGME49_240330	7.04761	5.7783e-08	TGME49_240880	2.0713	1.3365e-37
TGME49_224780	6.99069	0.000619553	TGME49_215895	2.44834	5.80211e-37
TGME49_238460	6.61331	3.27716e-07	TGME49_214430	3.0042	9.7636e-37
TGME49_259965	6.46299	5.36739e-11	TGME49_227430	1.43655	4.70606e-33
TGME49_275380	6.21014	4.81488e-07	TGME49_267670	1.92832	1.02651e-32
TGME49_315370	6.03865	1.91615e-05	TGME49_301150	5.4923	7.0475e-30
TGME49_240325	5.8649	1.44748e-10	TGME49_286010	2.46338	1.02823e-29
TGME49_231994	5.60499	0.000119921	TGME49_277060	5.0675	1.0766e-28
TGME49_315802	5.59109	9.14898e-05	TGME49_224230	2.49969	1.87504e-28
TGME49_224770	5.18262	8.38575e-66	TGME49_205210	4.16224	2.36312e-28
TGME49_266610	5.0952	4.15066e-11	TGME49_320230	3.37491	5.55628e-27
TGME49_278380	5.00243	4.75266e-39	TGME49_217410	2.2646	1.00117e-26
TGME49_257970	4.69271	4.97782e-21	TGME49_261740	-1.32725	3.75158e-26
TGME49_266600	4.33894	1.30692e-12	TGME49_227420	2.80479	5.47207e-26
TGME49_223258	4.12173	3.21726e-21	TGME49_241710	2.28648	8.17249e-26
TGME49_238490	4.06744	2.98165e-35	TGME49_286000	2.91808	2.10832e-23
TGME49_233610	4.01294	5.10696e-12	TGME49_210450	1.99233	1.19514e-22
TGME49_251958	4.00103	4.37401e-38	TGME49_295440	2.42111	5.73798e-22
TGME49_277060	3.9649	1.48563e-32	TGME49_212410	2.4268	7.04375e-22
TGME49_240290	3.93275	0.000382551	TGME49_278090	3.77529	3.62863e-21
TGME49_301150	3.82145	4.12431e-122	TGME49_297920	3.89765	4.40886e-21
TGME49_278390	3.8191	8.05389e-35	TGME49_215670	6.38062	6.67423e-21
TGME49_316580	3.8162	6.59988e-08	TGME49_295420	-1.25159	1.21206e-20
TGME49_305110	3.74892	0.00363259	TGME49_270700	1.70001	1.69879e-20
TGME49_254320	3.71826	0.000191218	TGME49_295105	-1.5787	4.53509e-20
TGME49_214783	3.70024	0.000279536	TGME49_318675	3.63528	8.40106e-20
TGME49_213460	3.69908	3.72058e-184	TGME49_253780	1.25712	2.10045e-19
TGME49_244335	3.67251	5.47514e-57	TGME49_211260	-1.12714	3.09593e-19
TGME49_278370	3.65877	5.33401e-53	TGME49_291960	-1.26103	4.80061e-19
TGME49_238440	3.64832	6.37356e-14	TGME49_310520	1.53462	5.10515e-19
TGME49_320230	3.64016	1.76498e-110	TGME49_251180	2.01996	6.37707e-19
TGME49_222420	3.47229	1.71694e-07	TGME49_252210	-1.46671	6.58173e-19
TGME49_316130	3.46244	7.39616e-17	TGME49_276200	2.39625	8.13404e-19
TGME49_205210	3.45707	5.45803e-130	TGME49_311100	-1.1652	1.39208e-18
TGME49_257000	3.4568	1.91917e-57	TGME49_219660	3.15397	3.20582e-18
TGME49_237800	3.40963	1.34537e-26	TGME49_296640	10.2884	8.00298e-18
TGME49_319360	3.3941	8.50607e-180	TGME49_281440	1.2034	9.56388e-18
TGME49_275360	3.37524	1.41861e-06	TGME49_270240	-1.26422	1.00079e-17
TGME49_294240	3.36052	6.10569e-20	TGME49_320180	1.55319	1.31836e-17
TGME49_264805	3.33583	1.37242e-07	TGME49_295110	-1.0191	1.9407e-17
TGME49_233180	3.33532	6.41311e-24	TGME49_240900	1.41414	2.1757e-17
TGME49_214787	3.31101	7.48537e-05	TGME49_229720	1.6945	2.39546e-17
TGME49_213430	3.28351	1.52019e-08	TGME49_285870	-1.24066	7.30352e-17
TGME49_243378	3.25078	6.43369e-28	TGME49_305270	-1.18452	1.04128e-16
TGME49_243382	3.17715	5.8977e-38	TGME49_236060	-1.11823	1.54261e-16
TGME49_320250	3.1239	1.25371e-05	TGME49_308090	-1.15597	1.75118e-16
TGME49_255460	3.10906	9.36248e-22	TGME49_223550	1.68477	1.86397e-16
TGME49_237810	3.02623	7.36555e-14	TGME49_222370	1.41689	4.37706e-16
TGME49_218340	3.00148	1.41069e-14	TGME49_207005	9.55711	1.4413e-15
TGME49_297920	2.95101	2.7237e-44	TGME49_270670	3.20367	1.62584e-15
TGME49_267460	2.93482	4.30305e-43	TGME49_243382	4.0675	3.51312e-15
TGME49_223060	2.90856	1.4016e-182	TGME49_306620	1.50968	4.41805e-15
TGME49_243482	2.89307	1.29721e-05	TGME49_216190	2.09995	8.05657e-15
TGME49_278090	2.80585	1.59351e-30	TGME49_213460	3.58789	1.08716e-14
TGME49_305790	2.7956	3.48442e-61	TGME49_319360	6.54125	1.12263e-14
TGME49_205450	2.76587	0.000414832	TGME49_288640	-1.9354	1.30493e-14
TGME49_224760	2.76546	8.51263e-11	TGME49_291900	1.56274	2.26831e-14
TGME49_218350	2.75715	0.0001253	TGME49_239770	-1.95743	2.69081e-14
TGME49_243940	2.71758	1.50422e-57	TGME49_207010	9.20075	2.69686e-14
TGME49_223900	2.71077	3.71257e-05	TGME49_292260	2.97078	2.92633e-14
TGME49_244950	2.69308	0.000228423	TGME49_237800	6.56485	5.6887e-14
TGME49_231125	2.65982	1.21624e-08	TGME49_316580	4.41641	8.39564e-14
TGME49_252255	2.65801	3.12374e-14	TGME49_231070	-1.11057	2.04105e-13
TGME49_267670	2.58932	4.02597e-152	TGME49_294410	4.27796	2.05249e-13
TGME49_278420	2.57234	0.00293373	TGME49_213255	1.76303	2.44193e-13
TGME49_295020	2.56801	0.00204368	TGME49_244450	1.70496	2.44748e-13
TGME49_282200	2.49567	2.77631e-17	TGME49_278440	1.23557	2.59001e-13
TGME49_292260	2.49412	2.51052e-18	TGME49_239475	2.53249	3.18944e-13
TGME49_246763	2.48198	4.35132e-05	TGME49_233180	4.64821	4.26386e-13
TGME49_315798	2.45258	0.00329604	TGME49_203930	-1.86457	6.72319e-13
TGME49_227430	2.4288	3.4151e-209	TGME49_253930	1.79972	8.09734e-13
TGME49_253350	2.38562	1.28469e-07	TGME49_205250	-1.18124	9.71926e-13
TGME49_241710	2.3382	2.90674e-113	TGME49_202200	-1.01866	1.72257e-12
TGME49_309830	2.32947	0.00276673	TGME49_287040	1.09726	3.06582e-12
TGME49_217920	2.3248	0.00252908	TGME49_201820	1.14048	3.37014e-12
TGME49_269310	2.3172	1.61662e-33	TGME49_312330	-1.57405	3.38758e-12
TGME49_301210	2.29382	4.28758e-62	TGME49_315770	-1.05706	4.72947e-12
TGME49_253780	2.27448	9.85501e-144	TGME49_260190	-2.09704	5.38089e-12
TGME49_240880	2.23698	1.20416e-104	TGME49_293510	-1.09653	6.83083e-12
TGME49_231400	2.22892	0.000965974	TGME49_301480	1.7972	9.01499e-12
TGME49_254160	2.22003	4.45734e-05	TGME49_267460	2.1839	1.04458e-11
TGME49_253790	2.20156	2.45618e-293	TGME49_218350	8.63114	1.13241e-11
TGME49_240390	2.20148	2.65063e-26	TGME49_246210	2.37389	1.89745e-11
TGME49_203770	2.16081	0.000350768	TGME49_243378	8.10497	2.31201e-11
TGME49_224230	2.12739	4.49517e-114	TGME49_315750	-1.42542	3.21279e-11
TGME49_281440	2.12734	3.46723e-128	TGME49_209180	2.78697	4.26324e-11
TGME49_278400	2.11588	4.78233e-35	TGME49_255460	3.051	5.0646e-11
TGME49_222080	2.10569	2.88711e-06	TGME49_285800	1.11529	5.28491e-11
TGME49_286020	2.08502	1.45533e-30	TGME49_309890	1.36545	6.09543e-11
TGME49_210450	2.07271	1.29747e-33	TGME49_211290	-1.18153	7.56909e-11
TGME49_216200	2.06254	3.45939e-16	TGME49_253770	2.13198	7.93401e-11
TGME49_248470	2.04544	2.95117e-22	TGME49_207015	6.79683	8.63418e-11
TGME49_234200	2.00028	1.7605e-30	TGME49_293280	1.37966	1.38142e-10
TGME49_256700	1.97682	3.09792e-05	TGME49_274170	6.72255	1.38519e-10
TGME49_313840	1.97329	0.000629777	TGME49_216415	2.10702	1.62426e-10
TGME49_278410	1.95972	0.000295559	TGME49_312950	-1.31955	1.92207e-10
TGME49_273980	1.95358	1.02248e-77	TGME49_210310	1.90471	2.41152e-10
TGME49_254890	1.92749	3.27771e-42	TGME49_295430	1.87495	2.6691e-10
TGME49_225435	1.92383	3.33089e-05	TGME49_311500	1.52447	3.63512e-10
TGME49_213480	1.92327	7.29622e-15	TGME49_216200	2.67525	3.9706e-10
TGME49_310177	1.8991	3.03183e-14	TGME49_313660	1.31422	5.03574e-10
TGME49_320610	1.89186	6.05455e-46	TGME49_265175	2.20024	5.13844e-10
TGME49_232400	1.8631	2.00179e-41	TGME49_316120	2.93866	5.54187e-10
TGME49_307030	1.85848	9.1984e-27	TGME49_318690	1.4545	5.73932e-10
TGME49_240370	1.84611	0.000102471	TGME49_205120	1.43923	6.0016e-10
TGME49_206650	1.84351	2.92622e-16	TGME49_278390	1.48091	7.22284e-10
TGME49_286000	1.83735	9.14255e-57	TGME49_264880	1.21083	7.53542e-10
TGME49_310520	1.83685	8.64562e-98	TGME49_213880	1.67518	8.26113e-10
TGME49_270680	1.83117	8.46686e-09	TGME49_320515	-1.0092	9.73228e-10
TGME49_232520	1.82059	1.8384e-30	TGME49_306300	1.0936	1.21243e-09
TGME49_248200	1.8064	2.67435e-43	TGME49_238490	3.64175	1.22027e-09
TGME49_319380	1.79035	3.2817e-13	TGME49_321630	1.29634	1.40016e-09
TGME49_264225	1.7855	9.7337e-13	TGME49_306510	2.49782	1.46179e-09
TGME49_288320	1.77552	9.34365e-13	TGME49_218340	3.08969	1.64388e-09
TGME49_293490	1.75548	8.77672e-18	TGME49_239250	1.27338	1.69324e-09
TGME49_230905	1.75164	1.01319e-09	TGME49_221630	1.12375	1.82103e-09
TGME49_299820	1.72425	2.14576e-21	TGME49_257780	1.31563	1.89708e-09
TGME49_291070	1.7209	0.00054761	TGME49_244660	-1.22044	2.59854e-09
TGME49_283882	1.71904	3.5466e-05	TGME49_203830	1.21326	3.07501e-09
TGME49_319695	1.71784	2.00857e-13	TGME49_245980	1.44738	3.11622e-09
TGME49_316370	1.70601	0.00013783	TGME49_275380	7.73779	3.4265e-09
TGME49_201180	1.69841	8.15363e-92	TGME49_224770	7.24799	3.96967e-09
TGME49_278230	1.69534	1.72916e-23	TGME49_301160	2.20618	4.14402e-09
TGME49_267470	1.68781	0.00011469	TGME49_279370	1.24387	4.31652e-09
TGME49_274170	1.6666	2.64221e-06	TGME49_300990	1.44574	4.72446e-09
TGME49_272440	1.66086	3.76476e-10	TGME49_257970	7.08531	4.94457e-09
TGME49_318500	1.65591	8.10062e-05	TGME49_309880	1.46257	5.62892e-09
TGME49_295720	1.6483	6.20431e-05	TGME49_213560	-2.03286	6.06056e-09
TGME49_256220	1.64422	2.35256e-22	TGME49_224250	1.76043	6.63493e-09
TGME49_208850	1.64355	5.59073e-23	TGME49_241130	1.82091	6.66562e-09
TGME49_276880	1.63958	3.26216e-06	TGME49_318610	2.9095	6.86521e-09
TGME49_246010	1.63682	4.7976e-87	TGME49_295960	-1.31307	7.23766e-09
TGME49_309950	1.63399	2.83393e-34	TGME49_315440	-1.19745	7.51176e-09
TGME49_313665	1.62888	3.5863e-18	TGME49_266368	1.80001	8.58696e-09
TGME49_291010	1.62665	3.9758e-10	TGME49_201520	-1.21504	9.25011e-09
TGME49_305800	1.62238	1.75485e-31	TGME49_299260	-2.36926	9.70173e-09
TGME49_268390	1.6148	6.37194e-10	TGME49_291150	1.34164	1.04394e-08
TGME49_232390	1.61476	8.37523e-16	TGME49_273640	1.06275	1.13981e-08
TGME49_318750	1.60225	1.28291e-10	TGME49_246690	-1.14671	1.14408e-08
TGME49_315740	1.60126	3.07205e-18	TGME49_278240	1.434	1.2575e-08
TGME49_205410	1.59858	1.08587e-19	TGME49_315380	7.50212	1.40651e-08
TGME49_275355	1.58913	3.41495e-06	TGME49_292375	1.41449	1.5068e-08
TGME49_318675	1.58512	3.42486e-17	TGME49_279450	2.02209	1.62058e-08
TGME49_319630	1.58423	1.09274e-09	TGME49_268730	1.35634	2.10382e-08
TGME49_202930	1.58374	1.40532e-21	TGME49_282200	6.83648	2.16582e-08
TGME49_253755	1.58153	0.00132098	TGME49_203050	1.30583	2.1926e-08
TGME49_202280	1.57215	7.17142e-25	TGME49_202060	3.98779	2.20857e-08
TGME49_223430	1.57174	2.02091e-09	TGME49_275355	4.4156	2.30368e-08
TGME49_212410	1.56617	1.74584e-28	TGME49_288030	-1.23274	2.3715e-08
TGME49_292375	1.56577	1.84806e-07	TGME49_316130	6.75693	2.38934e-08
TGME49_220585	1.56048	3.46593e-05	TGME49_220340	3.42467	2.8616e-08
TGME49_243390	1.55963	3.11565e-27	TGME49_216660	1.04807	2.86679e-08
TGME49_253770	1.55529	1.32516e-09	TGME49_202910	1.54366	2.91347e-08
TGME49_255310	1.55265	1.09771e-19	TGME49_269310	4.80571	2.97314e-08
TGME49_240500	1.55122	2.77403e-19	TGME49_251660	2.6175	3.2917e-08
TGME49_285860	1.54559	2.76459e-27	TGME49_290000	1.97918	3.4886e-08
TGME49_297080	1.54284	2.88997e-25	TGME49_251962	3.17147	3.51145e-08
TGME49_220080	1.54142	0.000501017	TGME49_278430	6.6511	3.71249e-08
TGME49_267520	1.5328	0.000563791	TGME49_310230	-1.00691	3.74499e-08
TGME49_294410	1.52732	1.39574e-27	TGME49_205390	1.4053	4.52157e-08
TGME49_316690	1.5215	1.52665e-07	TGME49_202420	-1.26638	4.6236e-08
TGME49_254850	1.51856	0.000872789	TGME49_310090	2.22085	4.70671e-08
TGME49_256650	1.50763	8.45389e-31	TGME49_310580	2.95188	5.11593e-08
TGME49_305560	1.50425	1.45545e-38	TGME49_229020	-1.15611	5.22183e-08
TGME49_255245	1.50109	3.43494e-12	TGME49_246178	-1.03583	5.3911e-08
TGME49_300980	1.49936	1.97195e-25	TGME49_246450	-1.16586	5.69005e-08
TGME49_242610	1.48813	8.68536e-26	TGME49_280470	1.19267	7.28529e-08
TGME49_291910	1.48242	0.000793005	TGME49_291920	3.19473	7.3312e-08
TGME49_259600	1.48119	9.09323e-56	TGME49_278400	2.33087	7.34873e-08
TGME49_200320	1.47339	1.87335e-24	TGME49_320170	2.73827	7.61674e-08
TGME49_269075	1.46422	8.0981e-05	TGME49_253310	1.18233	7.98087e-08
TGME49_313890	1.46378	0.00358087	TGME49_268670	1.88576	8.0381e-08
TGME49_289230	1.46355	2.873e-10	TGME49_242240	1.20948	8.96631e-08
TGME49_214760	1.46238	1.27961e-24	TGME49_296010	1.19493	1.08307e-07
TGME49_278630	1.46078	1.57917e-22	TGME49_202800	2.01129	1.1405e-07
TGME49_257945	1.4602	7.6888e-05	TGME49_257360	1.42389	1.23854e-07
TGME49_249660	1.45768	2.98789e-06	TGME49_280440	1.09327	1.29488e-07
TGME49_270670	1.45761	6.36776e-22	TGME49_222080	6.5302	1.32988e-07
TGME49_210245	1.45518	3.34006e-15	TGME49_276960	1.64842	1.34499e-07
TGME49_268670	1.45446	5.04957e-05	TGME49_273595	1.07693	1.39657e-07
TGME49_246910	1.45398	3.14124e-10	TGME49_320680	1.26059	1.44196e-07
TGME49_273595	1.45138	1.498e-33	TGME49_294840	1.0708	1.4875e-07
TGME49_295440	1.44274	2.79341e-57	TGME49_311490	1.27761	1.59393e-07
TGME49_229720	1.44211	2.39274e-40	TGME49_243110	6.55186	1.93518e-07
TGME49_274090	1.43877	2.7734e-09	TGME49_308093	-1.4436	1.93863e-07
TGME49_279450	1.4376	2.11888e-10	TGME49_243420	-1.75417	1.9403e-07
TGME49_307045	1.43265	5.83766e-07	TGME49_293480	1.32767	1.95386e-07
TGME49_329800	1.43072	9.55118e-50	TGME49_249810	1.12651	1.96219e-07
TGME49_313660	1.42883	1.16596e-34	TGME49_219840	1.27471	2.18122e-07
TGME49_278240	1.42012	5.85275e-19	TGME49_318400	1.11017	2.25448e-07
TGME49_288520	1.41064	1.71589e-05	TGME49_214760	2.39828	2.46708e-07
TGME49_312690	1.40849	0.000805105	TGME49_250950	1.21478	2.6282e-07
TGME49_283878	1.40381	1.09027e-11	TGME49_240330	6.95627	2.65294e-07
TGME49_213780	1.39125	2.74378e-11	TGME49_240390	2.24277	2.65409e-07
TGME49_203740	1.38869	5.93866e-43	TGME49_238470	6.54797	2.86438e-07
TGME49_301160	1.38599	1.07617e-14	TGME49_226290	1.32522	2.96562e-07
TGME49_262380	1.37696	4.93105e-55	TGME49_269320	1.01291	3.15216e-07
TGME49_319690	1.37406	7.93932e-05	TGME49_268035	1.29652	3.37362e-07
TGME49_285170	1.36853	3.19164e-15	TGME49_262740	-1.43078	3.41112e-07
TGME49_266675	1.3678	4.45245e-05	TGME49_310180	-1.00742	3.50867e-07
TGME49_210235	1.36215	1.26726e-10	TGME49_306480	1.45486	3.55395e-07
TGME49_271280	1.359	1.17907e-10	TGME49_217860	2.48046	3.70944e-07
TGME49_314750	1.35722	5.18651e-20	TGME49_228395	1.69192	3.90696e-07
TGME49_230110	1.35536	6.41537e-22	TGME49_201670	1.24919	3.97702e-07
TGME49_201820	1.35473	1.60963e-37	TGME49_264600	-1.08371	4.07304e-07
TGME49_305490	1.35088	3.49701e-15	TGME49_268230	1.2891	4.07913e-07
TGME49_239610	1.35053	2.28004e-20	TGME49_263400	1.12372	4.13429e-07
TGME49_309860	1.34953	0.000297718	TGME49_285865	1.40128	4.6056e-07
TGME49_269320	1.34669	2.51377e-33	TGME49_215270	1.49768	4.68421e-07
TGME49_312370	1.34235	8.22656e-28	TGME49_263830	1.76292	4.73666e-07
TGME49_288590	1.33492	1.08485e-09	TGME49_288620	1.0824	5.23294e-07
TGME49_267390	1.32467	1.38027e-34	TGME49_240470	-2.68875	5.34971e-07
TGME49_320200	1.32425	2.64161e-24	TGME49_205480	1.61735	5.37324e-07
TGME49_220330	1.32004	7.62464e-27	TGME49_270975	-1.04409	5.96402e-07
TGME49_239270	1.31964	2.26228e-50	TGME49_262935	1.11082	6.20233e-07
TGME49_225880	1.31396	1.00297e-25	TGME49_216335	1.32586	6.24418e-07
TGME49_203682	1.30818	0.00312926	TGME49_275350	1.30872	6.50529e-07
TGME49_312350	1.30726	6.6364e-12	TGME49_227050	1.17556	6.70133e-07
TGME49_223130	1.3061	3.42544e-23	TGME49_243400	1.17716	6.93168e-07
TGME49_226820	1.30206	0.000892339	TGME49_237810	3.0891	7.48258e-07
TGME49_320015	1.29941	1.26369e-15	TGME49_243770	1.89056	7.67892e-07
TGME49_314330	1.29743	8.32583e-12	TGME49_205370	-1.45623	7.87106e-07
TGME49_305610	1.2972	4.73455e-11	TGME49_223845	1.818	8.11155e-07
TGME49_210260	1.29187	1.78185e-09	TGME49_239070	1.02181	8.12405e-07
TGME49_229405	1.28954	1.76845e-07	TGME49_313510	1.5648	8.2014e-07
TGME49_212760	1.28896	1.77467e-12	TGME49_218500	2.46667	8.31871e-07
TGME49_217620	1.28657	2.21253e-15	TGME49_272730	1.4615	8.85735e-07
TGME49_213720	1.28467	0.000724182	TGME49_300048	1.27703	9.1825e-07
TGME49_289170	1.28349	5.77937e-30	TGME49_262420	1.00003	9.70764e-07
TGME49_260310	1.2782	3.15488e-38	TGME49_255470	1.06795	1.00543e-06
TGME49_296340	1.2572	0.0008213	TGME49_315900	1.33689	1.09071e-06
TGME49_292360	1.2555	7.90991e-42	TGME49_224830	1.13473	1.09112e-06
TGME49_300380	1.25256	3.04987e-32	TGME49_207950	1.15344	1.16499e-06
TGME49_212420	1.25159	6.88585e-07	TGME49_207200	1.25494	1.18872e-06
TGME49_267530	1.25062	3.3763e-17	TGME49_289170	1.19757	1.20605e-06
TGME49_291940	1.24612	3.79499e-38	TGME49_220585	1.67557	1.26314e-06
TGME49_246750	1.24305	3.79317e-08	TGME49_294820	1.7973	1.28031e-06
TGME49_223095	1.24132	1.13267e-09	TGME49_253050	1.44251	1.405e-06
TGME49_308990	1.24124	7.99519e-30	TGME49_217020	1.27031	1.44575e-06
TGME49_265170	1.24097	3.06377e-11	TGME49_277055	1.91008	1.49537e-06
TGME49_206680	1.23805	6.78073e-19	TGME49_267480	1.00238	1.54893e-06
TGME49_236990	1.23656	1.41259e-23	TGME49_299010	1.10738	1.6354e-06
TGME49_313050	1.23641	0.00401116	TGME49_260570	-1.00387	1.71406e-06
TGME49_219660	1.23634	0.000235365	TGME49_211300	-1.13282	1.82017e-06
TGME49_223560	1.23613	9.80768e-17	TGME49_233610	3.5962	1.82648e-06
TGME49_276200	1.2305	1.00923e-07	TGME49_309100	-1.27521	1.83923e-06
TGME49_248140	1.22606	1.30193e-23	TGME49_316230	1.10663	1.961e-06
TGME49_211470	1.22513	3.14038e-08	TGME49_309010	1.55622	2.0195e-06
TGME49_294812	1.22339	2.19604e-13	TGME49_207470	1.42917	2.035e-06
TGME49_203020	1.22158	8.97316e-19	TGME49_260825	-1.45005	2.15688e-06
TGME49_288580	1.22118	9.37955e-13	TGME49_248100	1.17476	2.20299e-06
TGME49_209020	1.21905	7.41913e-14	TGME49_264850	2.37721	2.36907e-06
TGME49_278365	1.21733	2.22989e-19	TGME49_225360	1.06941	2.40763e-06
TGME49_321900	1.21184	0.000839236	TGME49_244140	1.13747	2.45067e-06
TGME49_262750	1.21177	4.43229e-12	TGME49_254840	1.74231	2.47529e-06
TGME49_239320	1.21066	8.15927e-10	TGME49_212420	2.07854	2.53601e-06
TGME49_295010	1.20829	1.25063e-08	TGME49_240325	6.31766	2.55894e-06
TGME49_209460	1.20804	2.3054e-12	TGME49_245770	1.27831	2.61853e-06
TGME49_205060	1.20274	5.23793e-22	TGME49_253950	1.06076	2.68547e-06
TGME49_295430	1.20231	1.9398e-21	TGME49_260400	-1.11667	2.73189e-06
TGME49_276960	1.19564	0.000122497	TGME49_273110	1.56433	2.81095e-06
TGME49_300990	1.1956	1.306e-29	TGME49_253330	-2.60669	2.82827e-06
TGME49_225250	1.19365	6.32502e-28	TGME49_285300	-1.86369	2.90368e-06
TGME49_225430	1.19339	1.33007e-11	TGME49_235515	1.29387	2.90776e-06
TGME49_305620	1.19032	3.22028e-24	TGME49_240370	6.00018	3.26203e-06
TGME49_278100	1.18603	1.54879e-07	TGME49_268220	2.63214	3.36645e-06
TGME49_249160	1.18386	7.67488e-11	TGME49_218400	1.28658	3.41723e-06
TGME49_311390	1.18089	1.5173e-13	TGME49_265360	1.1453	3.54481e-06
TGME49_239475	1.17749	1.60538e-05	TGME49_222110	1.11567	3.66795e-06
TGME49_299070	1.17736	3.18295e-50	TGME49_329200	2.35513	3.68222e-06
TGME49_289960	1.17611	3.28669e-10	TGME49_294240	5.59263	3.77584e-06
TGME49_220650	1.17425	0.00120648	TGME49_264140	1.16973	3.79726e-06
TGME49_262940	1.17373	9.62616e-06	TGME49_224840	1.3209	3.80797e-06
TGME49_202910	1.17358	7.44567e-10	TGME49_313775	2.0348	3.92381e-06
TGME49_273640	1.17217	7.61959e-35	TGME49_214740	1.03825	3.97411e-06
TGME49_253800	1.16791	4.96175e-22	TGME49_249150	3.57803	4.03232e-06
TGME49_297925	1.16745	4.03827e-12	TGME49_293290	1.79524	4.31947e-06
TGME49_245650	1.16154	6.93331e-13	TGME49_232580	-2.45285	4.59252e-06
TGME49_249310	1.159	1.30701e-10	TGME49_313852	1.59503	4.93864e-06
TGME49_245520	1.15321	8.34095e-12	TGME49_309190	1.0579	4.96158e-06
TGME49_240450	1.15207	3.61754e-17	TGME49_259168	1.28333	5.04295e-06
TGME49_306480	1.15176	7.1487e-06	TGME49_297090	6.02687	5.21927e-06
TGME49_215400	1.14863	2.17673e-11	TGME49_232100	1.08848	5.24979e-06
TGME49_314660	1.14712	2.93279e-35	TGME49_244240	-1.26226	5.25053e-06
TGME49_320720	1.14677	2.61972e-13	TGME49_230118	1.32144	5.90903e-06
TGME49_281460	1.14619	6.21966e-08	TGME49_249685	1.37309	6.39302e-06
TGME49_307605	1.14496	1.24992e-18	TGME49_210400	2.12955	6.43944e-06
TGME49_263820	1.14348	3.70086e-64	TGME49_263740	1.13873	6.72978e-06
TGME49_304910	1.14107	3.61816e-16	TGME49_214160	1.26933	7.17182e-06
TGME49_244870	1.13776	2.736e-18	TGME49_297700	1.91659	7.76059e-06
TGME49_313710	1.13741	2.36189e-15	TGME49_249400	1.24886	8.01224e-06
TGME49_273430	1.13175	4.0366e-07	TGME49_206605	1.36693	8.18615e-06
TGME49_259220	1.12991	7.03056e-25	TGME49_244430	-1.07345	8.51469e-06
TGME49_315110	1.12849	2.83773e-22	TGME49_224760	5.66343	8.88287e-06
TGME49_257780	1.1281	1.13703e-14	TGME49_254160	3.05491	9.08379e-06
TGME49_319658	1.12761	4.69562e-18	TGME49_217660	1.44936	9.10302e-06
TGME49_305770	1.12687	3.00011e-28	TGME49_283878	1.05649	9.25741e-06
TGME49_200240	1.1252	0.00184208	TGME49_257945	3.09214	9.44668e-06
TGME49_239600	1.12288	0.000966742	TGME49_264745	2.37511	9.64236e-06
TGME49_267480	1.12087	2.14848e-31	TGME49_215020	1.03153	1.01926e-05
TGME49_246630	1.11912	1.12771e-28	TGME49_232640	1.00893	1.01958e-05
TGME49_203440	1.11902	4.96872e-06	TGME49_237595	1.29412	1.01983e-05
TGME49_225360	1.1176	3.49293e-11	TGME49_218740	-1.62972	1.02589e-05
TGME49_206490	1.11671	1.64857e-28	TGME49_211660	1.23783	1.07157e-05
TGME49_278245	1.11552	0.00010476	TGME49_301240	4.71611	1.07506e-05
TGME49_233925	1.10325	1.32861e-17	TGME49_220730	1.15679	1.08442e-05
TGME49_273830	1.09758	7.04861e-12	TGME49_238480	5.59903	1.08586e-05
TGME49_249215	1.0967	2.25466e-15	TGME49_270580	1.31519	1.15168e-05
TGME49_244160	1.09539	3.41554e-20	TGME49_256820	1.08741	1.18032e-05
TGME49_203120	1.09498	1.94653e-15	TGME49_307050	5.45274	1.19843e-05
TGME49_294820	1.09435	0.000108062	TGME49_207110	2.06778	1.21319e-05
TGME49_207760	1.09342	9.01337e-66	TGME49_273075	2.83672	1.24062e-05
TGME49_237600	1.09305	1.21027e-39	TGME49_278380	5.41074	1.24948e-05
TGME49_202490	1.09102	5.02542e-68	TGME49_228240	2.60201	1.28772e-05
TGME49_240400	1.09058	2.57958e-05	TGME49_275360	5.54688	1.35783e-05
TGME49_243750	1.08876	1.42666e-13	TGME49_320465	1.01527	1.38508e-05
TGME49_306520	1.08845	7.68533e-43	TGME49_260550	1.4304	1.45441e-05
TGME49_213880	1.08504	7.62239e-07	TGME49_244710	-1.07296	1.47723e-05
TGME49_203830	1.08383	1.37518e-18	TGME49_318640	1.62173	1.49774e-05
TGME49_206300	1.08346	1.52585e-17	TGME49_313770	1.14879	1.53926e-05
TGME49_239590	1.08115	5.57303e-34	TGME49_238077	2.23994	1.62536e-05
TGME49_244350	1.07977	3.58779e-17	TGME49_312830	1.23559	1.62864e-05
TGME49_293650	1.07496	1.86658e-14	TGME49_307815	1.24757	1.66203e-05
TGME49_295000	1.07425	4.18627e-19	TGME49_309910	1.04177	1.68075e-05
TGME49_273580	1.07308	1.09062e-26	TGME49_270805	-1.12829	1.78112e-05
TGME49_220150	1.07109	8.65906e-14	TGME49_276890	1.03956	1.78442e-05
TGME49_262935	1.07056	8.24684e-20	TGME49_257580	1.20303	1.97438e-05
TGME49_253740	1.06951	1.41917e-23	TGME49_268176	1.20277	1.97997e-05
TGME49_233310	1.06813	9.10051e-13	TGME49_202280	1.66535	2.02335e-05
TGME49_315958	1.06748	7.91452e-06	TGME49_210815	1.22699	2.14772e-05
TGME49_311410	1.06729	1.12418e-25	TGME49_204500	1.75589	2.23229e-05
TGME49_259210	1.06612	6.40261e-21	TGME49_259835	1.85478	2.26046e-05
TGME49_309570	1.06574	1.41013e-17	TGME49_258940	-1.74651	2.40879e-05
TGME49_284310	1.06462	1.42808e-16	TGME49_214545	1.48796	2.52527e-05
TGME49_243910	1.06372	9.20465e-38	TGME49_273300	1.60044	2.56021e-05
TGME49_264880	1.06091	1.66841e-25	TGME49_253760	1.47259	2.68074e-05
TGME49_316120	1.06003	0.00304452	TGME49_298830	1.24201	2.77162e-05
TGME49_253420	1.05771	5.47593e-20	TGME49_271320	-1.97948	2.81424e-05
TGME49_252230	1.05522	1.64529e-30	TGME49_234600	1.16608	2.92681e-05
TGME49_215895	1.05489	1.84259e-94	TGME49_289720	-1.07711	3.05507e-05
TGME49_228180	1.05484	5.67692e-31	TGME49_205090	2.63202	3.08189e-05
TGME49_295690	1.05335	1.60888e-15	TGME49_283840	1.99027	3.21546e-05
TGME49_240770	1.0526	0.00122905	TGME49_212955	1.18595	3.24157e-05
TGME49_273720	1.04791	3.10242e-17	TGME49_306260	1.01391	3.26774e-05
TGME49_295035	1.04722	8.46422e-08	TGME49_314330	1.26146	3.31823e-05
TGME49_311650	1.04656	5.72153e-16	TGME49_319630	2.83922	3.46567e-05
TGME49_281400	1.04624	1.78504e-70	TGME49_261620	1.43422	3.64804e-05
TGME49_247470	1.04509	7.10463e-55	TGME49_204395	1.72707	3.66439e-05
TGME49_309865	1.04466	0.00267409	TGME49_306500	5.18714	3.83664e-05
TGME49_265860	1.04456	9.6268e-09	TGME49_216290	1.10158	4.0201e-05
TGME49_225130	1.04392	5.50154e-12	TGME49_288870	1.0564	4.11567e-05
TGME49_209010	1.04378	2.17841e-12	TGME49_257610	1.30664	4.21049e-05
TGME49_266850	1.04368	4.66635e-19	TGME49_256220	2.21432	4.7004e-05
TGME49_266730	1.04278	1.35991e-24	TGME49_224620	1.09484	4.74467e-05
TGME49_316110	1.0403	1.58295e-07	TGME49_307030	5.00302	4.78023e-05
TGME49_315900	1.03858	2.32644e-18	TGME49_314440	1.09128	4.82069e-05
TGME49_251660	1.03658	3.46891e-18	TGME49_204300	4.78317	4.83588e-05
TGME49_241140	1.03241	4.24602e-10	TGME49_320250	4.37971	5.2273e-05
TGME49_268400	1.03135	4.26296e-10	TGME49_300360	-1.30818	5.24447e-05
TGME49_315330	1.03032	0.00128104	TGME49_278100	1.09351	5.3022e-05
TGME49_297150	1.02889	1.49399e-41	TGME49_296000	1.0314	5.35397e-05
TGME49_215660	1.02839	1.00774e-10	TGME49_273080	1.89648	5.49613e-05
TGME49_309990	1.02835	1.25717e-14	TGME49_204330	1.14405	5.71352e-05
TGME49_265030	1.02778	0.0028679	TGME49_222250	1.27998	5.83791e-05
TGME49_257100	1.02763	2.42039e-08	TGME49_288370	1.06343	5.89765e-05
TGME49_318275	1.02474	8.96514e-10	TGME49_259965	6.24383	6.02587e-05
TGME49_259690	1.02264	1.88609e-13	TGME49_240560	1.00545	6.0426e-05
TGME49_305840	1.01988	4.05819e-12	TGME49_233390	1.00324	6.32591e-05
TGME49_207720	1.0164	6.7106e-18	TGME49_208020	1.50365	6.35725e-05
TGME49_273815	1.01431	1.5317e-13	TGME49_205230	1.2339	6.7408e-05
TGME49_210750	1.00982	9.28259e-12	TGME49_281460	1.24572	6.88597e-05
TGME49_320620	1.00795	1.02563e-16	TGME49_293258	1.51706	6.89258e-05
TGME49_213752	1.00562	6.27454e-09	TGME49_269830	1.53367	7.00414e-05
TGME49_203370	1.00362	1.28691e-31	TGME49_252990	-1.16686	7.08154e-05
TGME49_314570	1.00232	7.43192e-16	TGME49_318632	1.42064	7.12214e-05
TGME49_281620	1.00029	1.49878e-16	TGME49_211870	1.76271	7.45613e-05
TGME49_276990	1.00012	2.45108e-17	TGME49_289216	2.45676	7.49267e-05
TGME49_296015	-1.00316	7.07098e-22	TGME49_301355	-2.10677	7.70218e-05
TGME49_234940	-1.00374	1.41353e-11	TGME49_312690	4.88713	7.91589e-05
TGME49_236850	-1.00475	5.47578e-29	TGME49_236880	-1.65449	7.97168e-05
TGME49_263660	-1.00609	6.52957e-08	TGME49_285750	1.07544	8.23248e-05
TGME49_221675	-1.00637	5.08008e-20	TGME49_233510	1.07609	8.75865e-05
TGME49_246190	-1.00654	7.39149e-17	TGME49_294650	3.09575	8.76815e-05
TGME49_215550	-1.00665	1.59731e-17	TGME49_271010	1.0886	8.93526e-05
TGME49_282070	-1.00704	4.1271e-44	TGME49_287430	1.69703	9.04703e-05
TGME49_203930	-1.00783	1.68038e-50	TGME49_269075	1.17249	9.29199e-05
TGME49_278850	-1.00796	5.03076e-46	TGME49_262970	-1.69114	9.65059e-05
TGME49_319600	-1.01048	1.42823e-32	TGME49_249660	2.12866	9.77108e-05
TGME49_314260	-1.01154	1.15108e-35	TGME49_209490	-1.10918	0.000100299
TGME49_211650	-1.0119	5.57671e-32	TGME49_245435	1.37619	0.000100431
TGME49_293730	-1.0136	3.06947e-29	TGME49_310940	1.55557	0.000101429
TGME49_213340	-1.01385	1.77894e-05	TGME49_236830	1.12496	0.000103552
TGME49_312150	-1.01421	5.94555e-77	TGME49_248240	-1.63913	0.000104025
TGME49_312950	-1.01646	3.8956e-41	TGME49_310480	-2.7489	0.000109245
TGME49_224520	-1.01715	2.60806e-45	TGME49_293490	2.99576	0.000109404
TGME49_315780	-1.01741	8.11602e-15	TGME49_311850	1.74065	0.00011325
TGME49_269425	-1.01774	5.5727e-16	TGME49_220110	1.05221	0.000116478
TGME49_250820	-1.02329	9.41795e-75	TGME49_258140	1.12486	0.000117669
TGME49_261955	-1.02364	3.16711e-31	TGME49_228380	1.02102	0.000118293
TGME49_208400	-1.02475	5.15664e-28	TGME49_205520	-1.56825	0.000125453
TGME49_222100	-1.02761	9.36598e-31	TGME49_220290	1.16405	0.0001266
TGME49_315570	-1.02807	0.000352613	TGME49_267970	1.04816	0.000129431
TGME49_210345	-1.02982	5.13875e-39	TGME49_213780	1.1116	0.000131909
TGME49_235380	-1.03245	5.37803e-51	TGME49_249890	1.42577	0.000133122
TGME49_215010	-1.03251	4.24478e-40	TGME49_268225	1.08815	0.000136607
TGME49_215775	-1.03418	6.3038e-45	TGME49_253960	1.02879	0.000137717
TGME49_293760	-1.03434	1.20898e-63	TGME49_307015	3.16951	0.000140625
TGME49_258660	-1.03887	6.62649e-77	TGME49_288610	-1.07366	0.000141211
TGME49_315360	-1.03989	7.13108e-37	TGME49_258900	-1.34116	0.000141828
TGME49_232020	-1.0399	3.21605e-44	TGME49_201160	1.24492	0.000146937
TGME49_215580	-1.04014	1.05488e-14	TGME49_318240	2.6417	0.000147995
TGME49_221818	-1.0425	1.62203e-11	TGME49_233930	1.17122	0.000150034
TGME49_244470	-1.04867	5.63705e-60	TGME49_228020	1.12902	0.00015408
TGME49_274120	-1.05105	1.02866e-20	TGME49_210975	1.04152	0.00015916
TGME49_280400	-1.0521	2.08401e-24	TGME49_213690	1.11009	0.000162756
TGME49_231160	-1.05226	1.93776e-48	TGME49_253480	-4.60182	0.000163133
TGME49_263200	-1.05255	8.75483e-31	TGME49_292600	1.267	0.000164246
TGME49_310235	-1.0556	2.32575e-41	TGME49_243520	1.22695	0.000164996
TGME49_324600	-1.05753	0.00200665	TGME49_219470	1.38263	0.00016797
TGME49_305130	-1.05816	2.15543e-09	TGME49_256010	-1.28198	0.000169839
TGME49_321600	-1.06079	2.66508e-74	TGME49_230650	1.20673	0.00017027
TGME49_200385	-1.0616	3.18325e-23	TGME49_264468	1.32413	0.00017417
TGME49_285425	-1.06167	3.83877e-28	TGME49_250920	1.52389	0.000177394
TGME49_306350	-1.06354	9.22592e-29	TGME49_206520	1.27707	0.000177935
TGME49_252210	-1.06409	1.65767e-36	TGME49_224100	1.07549	0.00018143
TGME49_216460	-1.06591	1.57915e-37	TGME49_316635	1.4689	0.000183366
TGME49_248560	-1.06734	2.72545e-06	TGME49_211270	1.01909	0.000186671
TGME49_224710	-1.06827	2.31251e-06	TGME49_214070	1.19514	0.000192267
TGME49_215530	-1.06944	4.32384e-23	TGME49_314560	3.94982	0.000192995
TGME49_237510	-1.07174	7.37248e-26	TGME49_307045	2.91851	0.000193488
TGME49_315470	-1.07249	9.58116e-72	TGME49_309300	4.82312	0.000194666
TGME49_273970	-1.07625	1.52742e-15	TGME49_223430	1.51507	0.000198802
TGME49_253100	-1.0792	3.34456e-45	TGME49_277830	1.41075	0.00020407
TGME49_255700	-1.08016	2.76348e-40	TGME49_211060	-1.28768	0.000204302
TGME49_286540	-1.08167	5.51664e-07	TGME49_212280	1.0666	0.000204816
TGME49_251740	-1.0847	1.61347e-40	TGME49_229300	1.47275	0.000205596
TGME49_252500	-1.09158	1.67184e-73	TGME49_262940	1.10131	0.000206697
TGME49_233030	-1.09239	9.17634e-31	TGME49_223480	1.17705	0.000209923
TGME49_310240	-1.09512	3.00258e-52	TGME49_310410	1.25937	0.000210357
TGME49_216620	-1.09673	5.84056e-29	TGME49_297170	1.12919	0.000216926
TGME49_270975	-1.0968	2.40794e-25	TGME49_299820	1.46308	0.000221199
TGME49_221370	-1.0981	1.50503e-29	TGME49_239880	1.69284	0.000224158
TGME49_239620	-1.0998	1.13084e-17	TGME49_204290	4.74523	0.000229776
TGME49_237210	-1.10059	2.02529e-38	TGME49_234590	1.51288	0.000234326
TGME49_297960	-1.10206	4.18548e-91	TGME49_279350	1.04785	0.000235597
TGME49_201630	-1.10245	1.36196e-38	TGME49_217810	1.09813	0.000236009
TGME49_250000	-1.10496	7.67205e-07	TGME49_267000	1.12908	0.00024289
TGME49_255160	-1.10637	1.57894e-07	TGME49_310650	1.09917	0.000243229
TGME49_201740	-1.10661	7.84416e-22	TGME49_315802	3.89799	0.000251005
TGME49_231640	-1.10941	2.17614e-66	TGME49_321660	1.31082	0.000251288
TGME49_271930	-1.11077	2.23502e-14	TGME49_264170	1.24756	0.000259965
TGME49_316340	-1.11112	2.54373e-48	TGME49_265060	-1.95154	0.000261934
TGME49_286580	-1.11305	6.05486e-82	TGME49_321510	1.21712	0.000268694
TGME49_215785	-1.11534	1.55576e-06	TGME49_214835	1.31658	0.000269184
TGME49_267500	-1.11672	2.0573e-43	TGME49_262550	1.1123	0.000277969
TGME49_214070	-1.11778	7.00324e-17	TGME49_312980	-1.56339	0.000279727
TGME49_313480	-1.11864	2.85716e-45	TGME49_221490	-1.24435	0.000283546
TGME49_216090	-1.11943	3.10707e-34	TGME49_278365	1.24913	0.000302459
TGME49_308010	-1.12053	1.56848e-80	TGME49_269225	1.70512	0.000308326
TGME49_294560	-1.12295	2.08909e-37	TGME49_254320	2.41387	0.000329174
TGME49_220900	-1.12303	1.25625e-126	TGME49_266600	2.9681	0.000334508
TGME49_315770	-1.1245	3.62484e-76	TGME49_320525	1.76756	0.000338758
TGME49_265650	-1.12741	4.11054e-14	TGME49_320500	-4.44074	0.000340671
TGME49_216080	-1.13298	3.97056e-77	TGME49_216785	1.14408	0.000345594
TGME49_241010	-1.13303	5.82073e-62	TGME49_287240	3.05574	0.000361059
TGME49_304730	-1.13795	4.96419e-25	TGME49_267490	1.2552	0.000361332
TGME49_254070	-1.13861	2.44401e-61	TGME49_252370	5.06099	0.000372084
TGME49_218955	-1.14033	2.54482e-15	TGME49_268660	2.12624	0.00037237
TGME49_267140	-1.14048	7.35162e-13	TGME49_301890	2.17944	0.000377655
TGME49_277250	-1.14057	0.000141909	TGME49_223530	-1.01875	0.000389152
TGME49_289710	-1.14099	5.12157e-34	TGME49_251750	-4.70621	0.000403665
TGME49_269340	-1.14524	1.40366e-85	TGME49_220850	1.21855	0.000404492
TGME49_289910	-1.14594	1.10881e-41	TGME49_276880	2.57285	0.000410108
TGME49_201520	-1.14595	1.4167e-24	TGME49_270080	2.06679	0.000415119
TGME49_244720	-1.14656	1.06062e-23	TGME49_273915	1.12657	0.000418974
TGME49_306370	-1.14703	4.75878e-15	TGME49_310920	1.47096	0.000428776
TGME49_235690	-1.1479	1.76075e-35	TGME49_281530	1.02886	0.000448607
TGME49_201860	-1.15169	6.40375e-19	TGME49_273985	2.08537	0.000448769
TGME49_280700	-1.15216	2.50237e-54	TGME49_238980	3.30165	0.000450592
TGME49_219175	-1.15533	4.10835e-13	TGME49_234375	1.19317	0.000451701
TGME49_261250	-1.15564	5.63384e-07	TGME49_207665	-2.55204	0.000465897
TGME49_223920	-1.1558	3.16252e-71	TGME49_288520	1.52074	0.000466026
TGME49_209250	-1.15596	1.09904e-61	TGME49_319690	1.26145	0.000471852
TGME49_309100	-1.16194	6.19338e-38	TGME49_314350	1.32514	0.000475949
TGME49_243690	-1.16263	9.48254e-47	TGME49_257000	1.19608	0.000480639
TGME49_244660	-1.16627	1.91364e-24	TGME49_314038	1.09478	0.000486504
TGME49_314358	-1.16764	1.15089e-07	TGME49_251650	1.05108	0.000514974
TGME49_262730	-1.16792	2.15077e-88	TGME49_240340	5.52649	0.000516762
TGME49_288030	-1.17108	3.25166e-37	TGME49_268820	3.39008	0.000517938
TGME49_240460	-1.17179	7.03853e-18	TGME49_289230	1.26005	0.00052724
TGME49_243250	-1.17209	9.3105e-50	TGME49_252395	3.04215	0.00052921
TGME49_278815	-1.17229	3.68936e-45	TGME49_220060	1.10909	0.000541453
TGME49_285870	-1.17437	2.76171e-36	TGME49_288590	1.12809	0.000563238
TGME49_271880	-1.17612	8.9535e-86	TGME49_285930	-1.0743	0.000565203
TGME49_244710	-1.17739	2.82282e-26	TGME49_247270	1.1361	0.000576184
TGME49_288045	-1.17859	4.5653e-24	TGME49_220125	1.20497	0.000600521
TGME49_209490	-1.17962	1.32794e-42	TGME49_286130	1.02103	0.0006113
TGME49_225315	-1.18002	4.62305e-05	TGME49_252480	-1.18653	0.000618791
TGME49_226260	-1.18067	2.9416e-46	TGME49_265205	-3.39277	0.000622045
TGME49_224700	-1.18423	4.25339e-52	TGME49_226800	1.11092	0.000624053
TGME49_321650	-1.18451	2.3665e-64	TGME49_316370	1.46556	0.000639704
TGME49_320030	-1.18465	9.86204e-47	TGME49_304980	1.2723	0.00065445
TGME49_271000	-1.18511	9.83959e-47	TGME49_274090	1.49954	0.000656025
TGME49_266970	-1.18666	2.47652e-08	TGME49_244105	1.00223	0.000670009
TGME49_226220	-1.18697	1.46015e-54	TGME49_238505	1.3592	0.00068573
TGME49_315495	-1.18702	1.04397e-54	TGME49_243700	1.81742	0.000710129
TGME49_299060	-1.1874	1.8321e-61	TGME49_293250	4.79781	0.000716494
TGME49_200295	-1.18757	2.52521e-06	TGME49_319380	1.19536	0.000729061
TGME49_272640	-1.18836	1.9642e-57	TGME49_235000	2.81808	0.000760723
TGME49_234250	-1.19507	2.37692e-117	TGME49_236270	1.03523	0.000767648
TGME49_308860	-1.19572	3.88155e-179	TGME49_312240	1.77523	0.000791804
TGME49_312930	-1.1979	8.82145e-07	TGME49_229390	-1.64527	0.000803032
TGME49_214080	-1.19821	1.91302e-32	TGME49_278370	2.97461	0.000828127
TGME49_203300	-1.19856	1.47344e-88	TGME49_210787	-1.45983	0.00085807
TGME49_311470	-1.19878	1.58502e-117	TGME49_202050	3.05594	0.000872723
TGME49_214510	-1.20147	3.7717e-05	TGME49_312120	1.16254	0.000880274
TGME49_285650	-1.20191	2.96799e-56	TGME49_304690	1.17881	0.000890524
TGME49_278130	-1.20226	6.43347e-45	TGME49_288945	-1.35273	0.00090004
TGME49_270240	-1.20244	1.33484e-87	TGME49_216140	-1.17547	0.00092052
TGME49_237195	-1.20315	3.47776e-34	TGME49_263323	2.20728	0.000936618
TGME49_230210	-1.20342	1.2709e-111	TGME49_253460	-2.41117	0.000944517
TGME49_311800	-1.20856	4.0194e-40	TGME49_216700	-1.10256	0.000957401
TGME49_213040	-1.21568	1.61505e-37	TGME49_219090	1.06161	0.000979492
TGME49_241165	-1.21813	0.000120094	TGME49_254850	-1.43279	0.000988901
TGME49_241000	-1.21966	1.67146e-45	TGME49_291970	-4.34239	0.000992123
TGME49_217360	-1.21992	1.52169e-49	TGME49_233960	2.3272	0.00100105
TGME49_202200	-1.22073	8.67699e-104	TGME49_210482	1.73579	0.00103339
TGME49_313380	-1.22374	2.90821e-54	TGME49_238460	4.19508	0.00104625
TGME49_264980	-1.22426	4.62795e-34	TGME49_210245	1.66305	0.00106763
TGME49_257430	-1.22563	2.42459e-74	TGME49_267642	1.58409	0.00106809
TGME49_310450	-1.22688	6.1557e-101	TGME49_259020	2.73589	0.0010996
TGME49_222350	-1.2273	3.35884e-66	TGME49_283890	1.18591	0.0011067
TGME49_262950	-1.22822	5.65671e-82	TGME49_305870	1.15412	0.0011145
TGME49_277720	-1.22868	2.99607e-71	TGME49_458910	-4.42116	0.00112405
TGME49_315410	-1.22924	1.29589e-08	TGME49_240460	-1.59073	0.00118964
TGME49_221620	-1.23356	2.4063e-41	TGME49_226930	1.2795	0.00121263
TGME49_272370	-1.23416	8.02169e-80	TGME49_216420	1.57061	0.00121957
TGME49_309930	-1.23416	4.16233e-14	TGME49_312970	1.20924	0.00123414
TGME49_293440	-1.23445	1.05183e-42	TGME49_231992	1.03091	0.00123992
TGME49_280770	-1.23604	8.6908e-93	TGME49_209300	-3.39746	0.00127687
TGME49_261750	-1.23623	1.24218e-73	TGME49_235180	-4.20205	0.00129128
TGME49_206695	-1.23816	1.15163e-25	TGME49_201240	-1.02799	0.00129552
TGME49_258780	-1.24006	2.94099e-34	TGME49_222150	1.45736	0.00132419
TGME49_220930	-1.24023	2.07532e-86	TGME49_243190	-1.51532	0.0013752
TGME49_209410	-1.24033	0.00284488	TGME49_260205	-4.20089	0.0013932
TGME49_209200	-1.24076	3.94369e-62	TGME49_301000	2.61457	0.00139384
TGME49_253580	-1.24104	7.34694e-07	TGME49_235430	1.43555	0.00140893
TGME49_275970	-1.24342	3.31669e-09	TGME49_233720	1.19896	0.00141573
TGME49_316670	-1.24455	1.7791e-06	TGME49_243360	1.79521	0.00143228
TGME49_279440	-1.24727	3.5984e-07	TGME49_297270	1.0459	0.00145771
TGME49_258700	-1.24781	2.50594e-87	TGME49_309185	1.03556	0.00148342
TGME49_263520	-1.24782	2.92557e-58	TGME49_272040	1.13188	0.00148902
TGME49_239830	-1.24795	7.7766e-57	TGME49_213380	1.05691	0.0014995
TGME49_218270	-1.24823	5.18076e-47	TGME49_206460	-1.06312	0.00151417
TGME49_272540	-1.24838	0.000355648	TGME49_297395	3.97468	0.00151956
TGME49_225330	-1.249	6.77064e-44	TGME49_207050	2.54398	0.00152136
TGME49_250840	-1.24982	5.1181e-67	TGME49_243120	4.13291	0.00155806
TGME49_315220	-1.25035	3.82155e-85	TGME49_259670	1.09095	0.00156478
TGME49_280680	-1.25409	1.48973e-05	TGME49_266610	2.68038	0.00157182
TGME49_230480	-1.25444	3.11061e-56	TGME49_271174	1.3115	0.00158492
TGME49_200375	-1.2548	1.2204e-28	TGME49_257670	2.06622	0.00162033
TGME49_262110	-1.25518	0.00274492	TGME49_227015	1.91504	0.00164135
TGME49_250220	-1.25836	8.30996e-24	TGME49_259270	-2.44412	0.00166625
TGME49_211000	-1.25859	0.00139533
TGME49_234540	-1.26057	5.7287e-40
TGME49_254290	-1.26082	1.2827e-15
TGME49_262630	-1.26299	6.5301e-09
TGME49_269910	-1.26426	7.63327e-08
TGME49_283790	-1.26475	3.28307e-25
TGME49_263130	-1.26666	3.13033e-65
TGME49_231070	-1.26723	8.56297e-110
TGME49_211260	-1.27163	7.18931e-111
TGME49_273560	-1.27329	9.08517e-59
TGME49_315490	-1.27436	1.32086e-175
TGME49_280480	-1.27657	2.62186e-37
TGME49_312270	-1.27673	2.00454e-148
TGME49_205530	-1.27706	0.000857851
TGME49_313475	-1.2774	2.33686e-05
TGME49_201130	-1.28083	1.64058e-72
TGME49_312580	-1.28264	1.83223e-62
TGME49_244500	-1.28366	1.20173e-67
TGME49_257550	-1.28402	3.15568e-103
TGME49_209040	-1.28509	8.03175e-25
TGME49_214420	-1.29045	7.83729e-19
TGME49_212770	-1.29101	4.39588e-108
TGME49_310620	-1.29243	4.77497e-50
TGME49_252200	-1.29658	5.64763e-65
TGME49_220025	-1.29907	9.92314e-08
TGME49_269885	-1.30295	1.33197e-52
TGME49_243420	-1.30545	1.03509e-12
TGME49_229260	-1.3098	7.8245e-72
TGME49_289720	-1.3105	3.024e-23
TGME49_258230	-1.31125	4.87522e-14
TGME49_258360	-1.3125	4.16093e-64
TGME49_215955	-1.31561	0.00169196
TGME49_287970	-1.31792	1.58975e-76
TGME49_267610	-1.31857	4.03344e-07
TGME49_318880	-1.31865	1.02541e-22
TGME49_252990	-1.32043	4.60445e-16
TGME49_287960	-1.32316	1.74321e-11
TGME49_319900	-1.32606	3.62932e-61
TGME49_297660	-1.32639	0.00123183
TGME49_225860	-1.3265	2.57189e-43
TGME49_249980	-1.32823	2.21457e-06
TGME49_297070	-1.33542	4.71912e-129
TGME49_286600	-1.3355	6.46494e-114
TGME49_228175	-1.33634	1.36191e-11
TGME49_221890	-1.33906	0.000425173
TGME49_265542	-1.3407	5.63355e-06
TGME49_278565	-1.34436	0.00018557
TGME49_246700	-1.34624	2.81453e-07
TGME49_267620	-1.34748	4.05902e-73
TGME49_258670	-1.34809	5.09798e-23
TGME49_224000	-1.35063	8.78602e-78
TGME49_268880	-1.3524	3.5359e-72
TGME49_209985	-1.35258	8.26578e-30
TGME49_249365	-1.35294	0.00276709
TGME49_221990	-1.35732	5.93664e-92
TGME49_286595	-1.35812	2.67593e-37
TGME49_220460	-1.35892	1.89822e-12
TGME49_255450	-1.35939	3.00964e-172
TGME49_265080	-1.36225	5.74945e-70
TGME49_236060	-1.3638	4.63309e-61
TGME49_306455	-1.36755	0.000337929
TGME49_271090	-1.37262	2.10807e-42
TGME49_204325	-1.37338	6.42948e-05
TGME49_300100	-1.37377	1.49677e-159
TGME49_305270	-1.38073	5.64672e-104
TGME49_205370	-1.38076	8.9602e-97
TGME49_293520	-1.38153	2.83735e-10
TGME49_265420	-1.38408	4.20318e-109
TGME49_219070	-1.38618	4.72689e-77
TGME49_294610	-1.38882	7.32238e-83
TGME49_232170	-1.39025	0.000434774
TGME49_300090	-1.3911	2.8794e-23
TGME49_237820	-1.39356	2.2348e-67
TGME49_206690	-1.39406	2.27351e-57
TGME49_280670	-1.39449	2.45705e-85
TGME49_235370	-1.39449	3.32964e-124
TGME49_289150	-1.39585	3.31219e-78
TGME49_230350	-1.39623	6.24707e-145
TGME49_286250	-1.3988	0.000250673
TGME49_239855	-1.39924	1.13572e-05
TGME49_318470	-1.39952	9.40528e-57
TGME49_224540	-1.4	4.18728e-59
TGME49_265065	-1.40037	2.42938e-06
TGME49_206440	-1.40157	9.14707e-06
TGME49_310220	-1.40165	2.40905e-71
TGME49_266630	-1.40742	6.23282e-83
TGME49_225690	-1.4102	1.29414e-71
TGME49_297870	-1.41028	4.88769e-51
TGME49_283800	-1.41076	2.97077e-24
TGME49_230970	-1.41373	2.69617e-25
TGME49_299260	-1.41391	2.94618e-08
TGME49_271115	-1.41482	0.000507842
TGME49_202390	-1.41764	1.68083e-68
TGME49_218740	-1.42147	7.61728e-18
TGME49_260580	-1.42666	2.97456e-84
TGME49_234350	-1.43323	1.29762e-57
TGME49_221390	-1.43622	7.67732e-71
TGME49_320515	-1.43803	3.85187e-103
TGME49_288640	-1.43812	5.60196e-62
TGME49_309080	-1.44014	3.64531e-22
TGME49_223985	-1.44044	1.11209e-72
TGME49_248240	-1.44057	7.86903e-08
TGME49_214880	-1.44115	1.28172e-138
TGME49_225105	-1.44171	2.62682e-43
TGME49_306060	-1.4439	4.26977e-51
TGME49_244070	-1.44991	8.34796e-32
TGME49_315750	-1.45276	9.66337e-44
TGME49_267642	-1.45352	1.15441e-08
TGME49_217961	-1.45564	1.16469e-19
TGME49_239730	-1.45601	3.26751e-16
TGME49_230200	-1.45998	5.73981e-06
TGME49_275610	-1.46747	3.34663e-84
TGME49_244080	-1.4696	7.80007e-45
TGME49_314362	-1.47022	3.5334e-07
TGME49_261740	-1.47328	6.70513e-56
TGME49_216290	-1.47479	5.71256e-05
TGME49_318240	-1.47774	0.000504758
TGME49_206400	-1.47938	2.32995e-23
TGME49_268765	-1.48248	2.26365e-08
TGME49_301355	-1.4883	2.09881e-05
TGME49_272285	-1.49036	5.54046e-05
TGME49_266065	-1.49379	0.00219523
TGME49_308090	-1.49484	1.13552e-67
TGME49_309590	-1.49508	7.4059e-99
TGME49_310010	-1.4979	5.4487e-147
TGME49_227370	-1.49878	6.83899e-06
TGME49_308093	-1.50281	8.09832e-53
TGME49_224880	-1.50426	2.62544e-35
TGME49_217700	-1.50732	1.93859e-35
TGME49_289160	-1.50842	2.56817e-32
TGME49_258580	-1.51115	2.25128e-301
TGME49_264990	-1.51305	7.55288e-59
TGME49_233490	-1.51342	2.35112e-131
TGME49_225320	-1.51504	7.82168e-44
TGME49_286590	-1.51926	1.94042e-154
TGME49_293560	-1.51929	0.000450502
TGME49_244280	-1.52365	4.15126e-62
TGME49_293020	-1.52929	0.000528631
TGME49_260490	-1.53546	1.65096e-22
TGME49_285825	-1.53937	0.00092617
TGME49_243190	-1.53976	1.14917e-05
TGME49_208730	-1.54099	1.96425e-99
TGME49_214575	-1.54609	1.7856e-45
TGME49_289590	-1.54636	9.404e-06
TGME49_313210	-1.55077	8.47085e-10
TGME49_242250	-1.55489	0.00391282
TGME49_294808	-1.55503	0.00052697
TGME49_308960	-1.55658	1.44483e-10
TGME49_208380	-1.55685	7.16918e-10
TGME49_212900	-1.56358	7.47574e-128
TGME49_322000	-1.5665	9.76248e-34
TGME49_297120	-1.56999	1.29842e-81
TGME49_291050	-1.57338	1.66829e-118
TGME49_268870	-1.57348	8.98028e-108
TGME49_300360	-1.57381	2.33871e-20
TGME49_315910	-1.57455	2.74744e-62
TGME49_295662	-1.57677	7.71804e-06
TGME49_253380	-1.57749	2.31693e-76
TGME49_301350	-1.58008	2.87897e-18
TGME49_253140	-1.58171	3.45075e-67
TGME49_310455	-1.58314	3.80726e-08
TGME49_226532	-1.5833	0.00241004
TGME49_218192	-1.58456	2.46495e-07
TGME49_293170	-1.5854	7.39276e-88
TGME49_226310	-1.58781	2.77024e-30
TGME49_215195	-1.59115	0.000207656
TGME49_308810	-1.5931	2.53123e-144
TGME49_238895	-1.59748	9.16677e-130
TGME49_314250	-1.60071	8.21085e-20
TGME49_256030	-1.60287	5.53216e-116
TGME49_267370	-1.61158	5.48181e-100
TGME49_285920	-1.61238	0.000251652
TGME49_222330	-1.61836	5.83631e-40
TGME49_234430	-1.62739	1.74949e-55
TGME49_209300	-1.63055	2.36895e-08
TGME49_239880	-1.64768	0.000905651
TGME49_229010	-1.64784	0
TGME49_215165	-1.64959	0.00328464
TGME49_205250	-1.65055	1.77318e-147
TGME49_270260	-1.65151	2.24813e-44
TGME49_238170	-1.65157	2.62037e-61
TGME49_203070	-1.65724	6.30736e-06
TGME49_205360	-1.65763	7.00432e-84
TGME49_310230	-1.65881	4.82221e-70
TGME49_208910	-1.66155	2.33139e-48
TGME49_291170	-1.66472	1.90517e-21
TGME49_314670	-1.67663	9.53937e-05
TGME49_255710	-1.67708	0.00370614
TGME49_238410	-1.68324	1.43486e-52
TGME49_308075	-1.69725	1.55982e-141
TGME49_213290	-1.70013	0.00190085
TGME49_243200	-1.70037	6.53216e-299
TGME49_212780	-1.7043	1.46548e-158
TGME49_248730	-1.70644	5.72698e-06
TGME49_291960	-1.70978	2.84491e-193
TGME49_311770	-1.70979	1.65363e-96
TGME49_225280	-1.71502	3.42842e-09
TGME49_260820	-1.71515	3.88921e-51
TGME49_258225	-1.72094	7.68237e-10
TGME49_273550	-1.72127	6.51074e-30
TGME49_207160	-1.7286	0.00192094
TGME49_291830	-1.72895	5.40485e-07
TGME49_206430	-1.7377	7.53088e-51
TGME49_247340	-1.75009	9.96169e-07
TGME49_295110	-1.751	5.965e-208
TGME49_254430	-1.758	8.88615e-06
TGME49_221250	-1.76146	2.30796e-228
TGME49_313940	-1.77225	1.19161e-14
TGME49_232780	-1.78119	2.13504e-119
TGME49_252080	-1.7822	4.1131e-09
TGME49_203250	-1.78259	0.00106627
TGME49_315510	-1.78489	1.44985e-99
TGME49_227630	-1.78624	1.54399e-98
TGME49_211290	-1.79223	9.8208e-47
TGME49_268680	-1.79884	8.02155e-138
TGME49_252395	-1.79932	0.00107548
TGME49_218362	-1.8019	6.61847e-71
TGME49_309160	-1.80878	3.45178e-37
TGME49_295125	-1.81239	2.48138e-45
TGME49_319520	-1.81437	1.12341e-24
TGME49_310020	-1.82745	1.09546e-06
TGME49_244715	-1.82801	4.37006e-12
TGME49_268220	-1.83613	4.30236e-15
TGME49_204880	-1.84043	1.01569e-143
TGME49_253460	-1.84217	2.30023e-11
TGME49_266090	-1.84732	7.854e-99
TGME49_265060	-1.84769	0.000285432
TGME49_297670	-1.85029	1.6634e-05
TGME49_262933	-1.85177	7.28684e-75
TGME49_203010	-1.85631	7.4416e-97
TGME49_270030	-1.86086	3.62507e-11
TGME49_258550	-1.86141	1.40326e-19
TGME49_253480	-1.8643	6.75389e-11
TGME49_234260	-1.87527	1.20317e-08
TGME49_203815	-1.87827	1.06824e-13
TGME49_236880	-1.88048	1.92356e-14
TGME49_207590	-1.88911	1.64268e-44
TGME49_327200	-1.89678	0.00054665
TGME49_218188	-1.89846	2.64162e-25
TGME49_242860	-1.90588	1.47399e-123
TGME49_219370	-1.90672	1.12658e-05
TGME49_203200	-1.90996	4.45983e-07
TGME49_208810	-1.91702	0.00138077
TGME49_207410	-1.92351	9.17486e-06
TGME49_203890	-1.92666	2.99975e-07
TGME49_239780	-1.93013	1.41693e-69
TGME49_310830	-1.93048	4.96655e-05
TGME49_239770	-1.93452	1.41387e-74
TGME49_261560	-1.94252	6.37299e-13
TGME49_299995	-1.96525	9.84919e-05
TGME49_231230	-1.97132	5.25022e-08
TGME49_310740	-1.98086	1.56565e-37
TGME49_256040	-1.98736	8.89106e-10
TGME49_316560	-1.98765	5.6799e-06
TGME49_320500	-1.98793	4.41017e-07
TGME49_201775	-1.99052	0.00019309
TGME49_209810	-1.99278	3.94971e-05
TGME49_280510	-2.002	1.57276e-27
TGME49_234270	-2.00294	1.71048e-166
TGME49_236860	-2.01741	2.42098e-118
TGME49_204000	-2.02046	1.9787e-05
TGME49_210400	-2.02106	3.8644e-34
TGME49_225300	-2.02697	5.79591e-121
TGME49_211430	-2.0343	8.66504e-07
TGME49_313780	-2.03784	8.36182e-250
TGME49_305530	-2.04129	3.21837e-06
TGME49_295105	-2.04164	3.28229e-161
TGME49_253710	-2.04293	3.42049e-14
TGME49_219742	-2.04427	4.40909e-08
TGME49_254330	-2.04562	8.81442e-08
TGME49_238060	-2.0457	0.00293395
TGME49_267630	-2.04712	1.55028e-06
TGME49_218750	-2.04992	2.38965e-11
TGME49_313650	-2.05276	0.000171461
TGME49_285445	-2.066	1.8273e-05
TGME49_232560	-2.06927	5.07982e-201
TGME49_275850	-2.09198	7.85897e-28
TGME49_293030	-2.09211	8.12315e-11
TGME49_277265	-2.09485	6.89992e-06
TGME49_201850	-2.11979	0.000454514
TGME49_218290	-2.12784	0.000215007
TGME49_204010	-2.13288	1.88363e-06
TGME49_205140	-2.13357	8.54014e-06
TGME49_313000	-2.15725	0.00069771
TGME49_294225	-2.15799	0.000153254
TGME49_244180	-2.18755	1.24403e-19
TGME49_202400	-2.18927	0.000167467
TGME49_243720	-2.19198	9.55425e-07
TGME49_299800	-2.19882	8.95546e-09
TGME49_320150	-2.205	4.81116e-13
TGME49_253120	-2.25652	3.1278e-23
TGME49_312980	-2.2703	2.34387e-05
TGME49_304870	-2.27996	7.43539e-18
TGME49_213560	-2.28847	4.5698e-24
TGME49_283530	-2.30828	4.03356e-06
TGME49_311710	-2.31229	1.78937e-11
TGME49_285940	-2.32724	6.5673e-07
TGME49_205520	-2.3508	4.4097e-12
TGME49_264485	-2.35251	5.52426e-75
TGME49_297910	-2.36886	4.41706e-25
TGME49_278145	-2.37018	0.00153102
TGME49_278840	-2.3755	0.000218636
TGME49_267150	-2.38286	1.03097e-36
TGME49_218510	-2.4042	2.57294e-14
TGME49_252860	-2.40458	1.89969e-06
TGME49_258900	-2.42728	1.39518e-80
TGME49_319700	-2.42755	9.43575e-05
TGME49_249230	-2.43874	1.14563e-05
TGME49_297410	-2.44298	1.65259e-25
TGME49_219450	-2.44669	6.48003e-12
TGME49_238160	-2.44816	0.000167863
TGME49_260190	-2.48224	1.46265e-65
TGME49_285300	-2.50467	1.42513e-22
TGME49_267160	-2.53335	8.16181e-29
TGME49_258622	-2.53433	0.000661798
TGME49_205658	-2.53467	2.12085e-11
TGME49_270040	-2.53703	4.53581e-26
TGME49_253330	-2.54095	2.34421e-33
TGME49_219110	-2.54592	2.04977e-17
TGME49_211280	-2.56068	2.45634e-19
TGME49_272510	-2.57751	9.3158e-05
TGME49_295640	-2.59804	0.00371156
TGME49_216710	-2.60704	1.91536e-23
TGME49_232140	-2.61226	0.000109442
TGME49_257460	-2.62651	0.00321559
TGME49_294600	-2.62919	0.000765906
TGME49_233770	-2.63718	0.00213238
TGME49_266860	-2.64962	2.92448e-13
TGME49_212275	-2.65473	1.54809e-18
TGME49_229240	-2.67383	4.76249e-07
TGME49_220280	-2.67455	1.33039e-13
TGME49_239430	-2.68201	0.000141107
TGME49_235390	-2.70359	1.27283e-05
TGME49_232420	-2.70541	6.23431e-18
TGME49_259150	-2.7287	0.00093927
TGME49_268700	-2.76574	6.25412e-05
TGME49_270273	-2.80818	0.00147766
TGME49_224140	-2.84209	8.38254e-13
TGME49_205265	-2.86449	3.32605e-106
TGME49_288960	-2.8724	1.74872e-21
TGME49_215140	-2.8774	9.59984e-05
TGME49_235010	-2.91334	2.51702e-09
TGME49_318120	-2.93434	2.30395e-09
TGME49_275590	-2.96282	0.00235369
TGME49_243470	-2.97201	3.30261e-06
TGME49_251750	-3.0069	8.32787e-06
TGME49_311700	-3.01069	2.51473e-16
TGME49_258618	-3.03609	0.00276044
TGME49_288050	-3.04071	3.59854e-05
TGME49_203375	-3.05024	2.28004e-05
TGME49_225570	-3.05389	2.05415e-07
TGME49_310480	-3.06912	3.47794e-10
TGME49_231780	-3.17419	4.29193e-07
TGME49_233405	-3.20373	0.00136003
TGME49_219828	-3.23117	4.96389e-05
TGME49_280500	-3.23566	3.64092e-13
TGME49_235315	-3.28361	0.000572737
TGME49_254060	-3.32854	3.4151e-18
TGME49_259890	-3.35233	1.95516e-08
TGME49_209920	-3.36614	0.00235895
TGME49_220420	-3.38537	5.94928e-21
TGME49_271040	-3.41262	0.000246421
TGME49_280570	-3.43236	1.90243e-12
TGME49_247970	-3.45779	2.88936e-24
TGME49_292935	-3.4591	7.54803e-15
TGME49_286150	-3.46613	4.33938e-05
TGME49_309030	-3.48393	9.99694e-12
TGME49_265538	-3.53737	0.00141815
TGME49_222935	-3.5415	2.4992e-11
TGME49_259270	-3.55184	4.23466e-19
TGME49_288465	-3.55857	0.00331027
TGME49_210990	-3.56547	0.000408694
TGME49_297725	-3.72189	1.40394e-06
TGME49_315480	-3.74085	2.61155e-09
TGME49_305280	-3.77002	4.59613e-06
TGME49_267990	-3.77912	1.75978e-06
TGME49_268190	-3.79361	1.92835e-07
TGME49_262440	-3.83089	0.00035905
TGME49_205662	-3.8646	2.72509e-06
TGME49_234400	-3.90465	0.00451316
TGME49_309025	-3.93454	0.00243043
TGME49_237045	-4.06465	0.00274969
TGME49_262050	-4.10158	0
TGME49_258910	-4.22139	5.12361e-07
TGME49_295995	-4.2616	2.06042e-13
TGME49_240470	-4.27811	2.36815e-20
TGME49_229320	-4.33158	0.00089429
TGME49_247010	-4.41362	0.00460137
TGME49_258570	-4.41894	6.22213e-06
TGME49_239110	-4.6038	0.00393579
TGME49_265050	-4.63602	7.12206e-06
TGME49_209045	-4.68392	0.001668
TGME49_203900	-4.72764	0.00341747
TGME49_231770	-4.74194	5.87772e-06
TGME49_293425	-4.76439	1.00286e-08
TGME49_246110	-4.95779	0.000854996
TGME49_208770	-5.05703	0.00281856
TGME49_203000	-5.07931	0.00370843
TGME49_293790	-5.13272	1.87335e-09
TGME49_225140	-5.14689	0.00229667
TGME49_242360	-5.20573	0.00327882
TGME49_224010	-5.32503	0.000189479
TGME49_221895	-5.40368	7.99333e-05
TGME49_234570	-5.45366	8.83542e-05
TGME49_253670	-5.56977	0.000241304
TGME49_267410	-5.66948	0.00359101
TGME49_253390	-5.75474	0.000274537
TGME49_221930	-6.07577	0.000871851
TGME49_318180	-6.32776	2.15223e-05
TGME49_285350	-6.34557	0.000124537
TGME49_278710	-6.81535	9.3262e-06
TGME49_319890	-6.90693	7.8942e-09
