# Supplementary material for: AP2XII-1 and AP2XI-2 Suppress Schizogony Gene Expression in Toxoplasma gondii
Source: Int J Mol Sci. 2024 May 18;25(10):5527. doi: 10.3390/ijms25105527 (PMC11122372; doi:10.3390/ijms25105527)
Supplement: Supplementary file 1 [file ijms-25-05527-s001.zip › Table S5.xlsx]

## Sheet: Sheet1
Table S5: AP2XII-1 and AP2XI-2-regulated stage-specific T. gondii genes. The genes specific for EES, Bradyzoite, Merozoite, and sporozoite were obtained from Farhat et al., (2020, Nature Microbiology) .
Cluster 1：EES stage genes repressed by RH AP2XII-1				Cluster 4：EES stage genes repressed by RH AP2XI-2
Cluster 2：Bradyzoite stage genes repressed by RH AP2XII-1				Cluster 5：Bradyzoite stage genes repressed by RH AP2XI-2
Cluster 3：Sporozoite stage genes repressed by RH AP2XII-1				Cluster 6：Sporozoite stage genes repressed by RH AP2XI-2
RH AP2XII-1 KD(n=1179）	Cluster 1（n=198）	Cluster 2（n=42）	Cluster 3（n=15）	RH AP2XI-2 KD(n=985）	Cluster 4（n=119）	Cluster 5（n=31）	Cluster 6（n=10）	EES stages (n=996)	Bradyzoite (n=331)	Merozoite (n=312)	Sporozoite (n=295)
TGME49_257925	TGME49_257925	TGME49_262470	TGME49_249750	TGME49_296640	TGME49_296640	TGME49_257970	TGME49_254160	TGME49_200130	TGME49_203820	TGME49_329710	TGME49_201730
TGME49_257910	TGME49_257910	TGME49_257970	TGME49_268310	TGME49_207005	TGME49_207005	TGME49_266600	TGME49_293490	TGME49_200300	TGME49_204045	TGME49_329700	TGME49_202340
TGME49_259030	TGME49_259030	TGME49_244335	TGME49_276880	TGME49_207015	TGME49_207015	TGME49_240290	TGME49_230905	TGME49_200600	TGME49_205265	TGME49_327300	TGME49_203985
TGME49_243110	TGME49_249040	TGME49_257810	TGME49_254160	TGME49_207010	TGME49_207010	TGME49_244335	TGME49_276880	TGME49_201640	TGME49_205450	TGME49_325200	TGME49_204520
TGME49_249040	TGME49_243120	TGME49_238440	TGME49_266670	TGME49_315380	TGME49_315380	TGME49_238440	TGME49_214760	TGME49_201650	TGME49_207150	TGME49_321800	TGME49_205020
TGME49_243120	TGME49_278320	TGME49_270655	TGME49_288520	TGME49_278430	TGME49_278430	TGME49_255460	TGME49_288520	TGME49_201660	TGME49_207600	TGME49_321710	TGME49_206580
TGME49_278320	TGME49_231880	TGME49_266600	TGME49_292600	TGME49_251962	TGME49_251962	TGME49_205450	TGME49_262940	TGME49_201750	TGME49_209490	TGME49_321700	TGME49_207740
TGME49_231880	TGME49_258840	TGME49_306500	TGME49_214760	TGME49_238470	TGME49_238470	TGME49_231125	TGME49_203830	TGME49_201895	TGME49_209610	TGME49_321490	TGME49_208770
TGME49_258840	TGME49_305110	TGME49_267130	TGME49_219640	TGME49_257925	TGME49_257925	TGME49_267670	TGME49_215895	TGME49_202140	TGME49_210482	TGME49_321480	TGME49_209810
TGME49_305110	TGME49_278340	TGME49_269310	TGME49_293490	TGME49_243110	TGME49_240330	TGME49_269310	TGME49_318275	TGME49_202210	TGME49_210682	TGME49_321470	TGME49_209920
TGME49_278340	TGME49_297090	TGME49_314250	TGME49_258880	TGME49_240330	TGME49_224780	TGME49_253790		TGME49_202255	TGME49_211910	TGME49_321280	TGME49_209930
TGME49_297090	TGME49_251962	TGME49_219742	TGME49_204520	TGME49_224780	TGME49_238460	TGME49_278400		TGME49_202260	TGME49_212200	TGME49_321270	TGME49_210950
TGME49_316320	TGME49_312690	TGME49_209985	TGME49_286670	TGME49_238460	TGME49_259965	TGME49_225435		TGME49_202400	TGME49_213720	TGME49_320770	TGME49_211920
TGME49_251962	TGME49_315370	TGME49_250220	TGME49_318275	TGME49_259965	TGME49_275380	TGME49_232400		TGME49_202975	TGME49_217915	TGME49_320730	TGME49_213255
TGME49_312690	TGME49_233610	TGME49_210095	TGME49_305930	TGME49_275380	TGME49_315370	TGME49_313665		TGME49_202990	TGME49_220208	TGME49_320560	TGME49_213340
TGME49_315370	TGME49_243180	TGME49_224845		TGME49_315370	TGME49_240325	TGME49_318750		TGME49_203110	TGME49_221220	TGME49_320290	TGME49_213635
TGME49_233610	TGME49_207965	TGME49_278400		TGME49_240325	TGME49_224770	TGME49_223430		TGME49_203135	TGME49_221860	TGME49_320240	TGME49_214960
TGME49_233670	TGME49_207050	TGME49_321710		TGME49_231994	TGME49_266610	TGME49_292375		TGME49_203200	TGME49_223110	TGME49_320230	TGME49_215140
TGME49_243180	TGME49_258120	TGME49_278882		TGME49_315802	TGME49_278380	TGME49_300980		TGME49_203330	TGME49_224140	TGME49_320170	TGME49_216160
TGME49_207965	TGME49_213430	TGME49_315520		TGME49_224770	TGME49_223258	TGME49_313890		TGME49_203505	TGME49_224845	TGME49_320090	TGME49_218450
TGME49_316690	TGME49_200480	TGME49_240290		TGME49_266610	TGME49_238490	TGME49_203682		TGME49_203570	TGME49_224890	TGME49_319630	TGME49_218460
TGME49_207050	TGME49_238460	TGME49_294805		TGME49_278380	TGME49_233610	TGME49_213720		TGME49_203770	TGME49_224950	TGME49_319090	TGME49_218490
TGME49_258120	TGME49_278430	TGME49_207600		TGME49_257970	TGME49_251958	TGME49_296340		TGME49_203800	TGME49_225300	TGME49_318880	TGME49_218750
TGME49_249750	TGME49_319630	TGME49_235515		TGME49_266600	TGME49_277060	TGME49_313050		TGME49_203890	TGME49_225435	TGME49_318220	TGME49_219670
TGME49_213430	TGME49_237810	TGME49_304930		TGME49_223258	TGME49_301150	TGME49_220650		TGME49_203900	TGME49_225940	TGME49_316890	TGME49_220175
TGME49_200480	TGME49_307603	TGME49_315900		TGME49_238490	TGME49_278390	TGME49_262940		TGME49_204010	TGME49_226040	TGME49_316690	TGME49_220280
TGME49_238460	TGME49_237800	TGME49_225435		TGME49_233610	TGME49_305110	TGME49_200240		TGME49_204300	TGME49_226420	TGME49_316670	TGME49_224560
TGME49_278430	TGME49_249150	TGME49_286740		TGME49_251958	TGME49_254320	TGME49_284310		TGME49_204325	TGME49_229390	TGME49_316580	TGME49_225745
TGME49_319630	TGME49_251958	TGME49_318750		TGME49_277060	TGME49_213460	TGME49_273720		TGME49_204360	TGME49_229930	TGME49_316420	TGME49_226230
TGME49_237810	TGME49_219660	TGME49_250020		TGME49_240290	TGME49_278370	TGME49_315900		TGME49_204468	TGME49_230400	TGME49_316410	TGME49_226490
TGME49_262470	TGME49_315380	TGME49_213720		TGME49_301150	TGME49_222420	TGME49_309990		TGME49_204472	TGME49_230890	TGME49_315400	TGME49_227590
TGME49_307603	TGME49_225950	TGME49_300980		TGME49_278390	TGME49_316130			TGME49_204560	TGME49_231125	TGME49_315390	TGME49_228070
TGME49_301470	TGME49_238220	TGME49_286670		TGME49_316580	TGME49_237800			TGME49_205050	TGME49_232590	TGME49_315380	TGME49_229005
TGME49_237800	TGME49_296640	TGME49_273915		TGME49_305110	TGME49_319360			TGME49_205070	TGME49_232960	TGME49_315370	TGME49_229330
TGME49_249150	TGME49_240330	TGME49_245770		TGME49_254320	TGME49_275360			TGME49_205080	TGME49_234530	TGME49_315350	TGME49_232080
TGME49_316580	TGME49_204000	TGME49_223430		TGME49_214783	TGME49_233180			TGME49_205140	TGME49_235515	TGME49_315240	TGME49_233290
TGME49_251958	TGME49_275790	TGME49_300300		TGME49_213460	TGME49_213430			TGME49_205420	TGME49_238200	TGME49_314250	TGME49_234400
TGME49_219660	TGME49_203800	TGME49_271335		TGME49_244335	TGME49_243378			TGME49_205520	TGME49_240285	TGME49_312690	TGME49_235402
TGME49_315380	TGME49_313840	TGME49_267670		TGME49_278370	TGME49_243382			TGME49_205590	TGME49_240290	TGME49_311700	TGME49_235590
TGME49_243482	TGME49_320250	TGME49_210482		TGME49_238440	TGME49_320250			TGME49_206290	TGME49_241130	TGME49_311300	TGME49_238160
TGME49_277705	TGME49_207010	TGME49_243240		TGME49_320230	TGME49_237810			TGME49_206350	TGME49_243350	TGME49_310420	TGME49_239700
TGME49_256965	TGME49_233180	TGME49_292375		TGME49_222420	TGME49_297920			TGME49_206400	TGME49_244260	TGME49_309990	TGME49_239755
TGME49_225950	TGME49_207005			TGME49_316130	TGME49_267460			TGME49_206550	TGME49_244515	TGME49_309352	TGME49_239885
TGME49_238220	TGME49_310680			TGME49_205210	TGME49_278090			TGME49_206560	TGME49_245475	TGME49_309330	TGME49_242310
TGME49_296640	TGME49_278420			TGME49_257000	TGME49_305790			TGME49_206570	TGME49_245748	TGME49_309300	TGME49_243655
TGME49_257970	TGME49_246070			TGME49_237800	TGME49_243940			TGME49_206650	TGME49_246930	TGME49_307640	TGME49_244360
TGME49_240330	TGME49_206650			TGME49_319360	TGME49_252255			TGME49_207050	TGME49_247220	TGME49_307090	TGME49_246660
TGME49_204000	TGME49_305100			TGME49_275360	TGME49_278420			TGME49_207403	TGME49_248460	TGME49_306455	TGME49_247620
TGME49_275790	TGME49_306480			TGME49_294240	TGME49_295020			TGME49_207407	TGME49_248990	TGME49_306270	TGME49_248820
TGME49_203800	TGME49_315127			TGME49_264805	TGME49_282200			TGME49_207470	TGME49_249030	TGME49_306235	TGME49_249230
TGME49_313840	TGME49_275798			TGME49_233180	TGME49_292260			TGME49_207610	TGME49_249670	TGME49_305220	TGME49_249750
TGME49_320250	TGME49_223258			TGME49_214787	TGME49_217920			TGME49_207700	TGME49_250930	TGME49_305110	TGME49_250100
TGME49_231994	TGME49_285400			TGME49_213430	TGME49_240880			TGME49_207970	TGME49_251170	TGME49_301480	TGME49_252330
TGME49_207010	TGME49_220340			TGME49_243378	TGME49_240390			TGME49_208020	TGME49_251440	TGME49_301470	TGME49_252350
TGME49_233180	TGME49_294820			TGME49_243382	TGME49_203770			TGME49_208810	TGME49_251540	TGME49_301160	TGME49_254160
TGME49_207005	TGME49_294410			TGME49_320250	TGME49_222080			TGME49_209040	TGME49_253300	TGME49_301150	TGME49_254790
TGME49_310680	TGME49_266610			TGME49_255460	TGME49_286020			TGME49_209045	TGME49_253640	TGME49_300990	TGME49_256792
TGME49_245980	TGME49_224770			TGME49_237810	TGME49_210450			TGME49_209300	TGME49_253820	TGME49_300080	TGME49_258200
TGME49_278420	TGME49_228050			TGME49_218340	TGME49_248470			TGME49_209480	TGME49_254120	TGME49_298960	TGME49_258550
TGME49_246070	TGME49_278380			TGME49_297920	TGME49_313840			TGME49_209485	TGME49_254150	TGME49_297680	TGME49_258618
TGME49_206650	TGME49_280605			TGME49_267460	TGME49_278410			TGME49_209510	TGME49_254640	TGME49_297090	TGME49_258622
TGME49_202065	TGME49_217370			TGME49_223060	TGME49_273980			TGME49_209560	TGME49_254870	TGME49_296640	TGME49_258890
TGME49_305100	TGME49_294595			TGME49_243482	TGME49_254890			TGME49_210210	TGME49_257720	TGME49_295995	TGME49_259900
TGME49_306480	TGME49_275850			TGME49_278090	TGME49_213480			TGME49_210400	TGME49_258230	TGME49_295640	TGME49_262110
TGME49_315127	TGME49_310580			TGME49_305790	TGME49_307030			TGME49_210450	TGME49_259205	TGME49_294330	TGME49_265120
TGME49_244335	TGME49_236400			TGME49_205450	TGME49_240370			TGME49_210990	TGME49_259630	TGME49_293690	TGME49_265130
TGME49_257810	TGME49_316130			TGME49_224760	TGME49_206650			TGME49_211000	TGME49_262470	TGME49_293372	TGME49_265290
TGME49_275798	TGME49_273980			TGME49_218350	TGME49_286000			TGME49_211050	TGME49_262740	TGME49_292260	TGME49_265538
TGME49_223258	TGME49_282200			TGME49_243940	TGME49_270680			TGME49_211270	TGME49_263270	TGME49_291920	TGME49_266670
TGME49_285400	TGME49_217420			TGME49_223900	TGME49_319380			TGME49_211320	TGME49_263785	TGME49_291910	TGME49_267990
TGME49_220340	TGME49_236290			TGME49_244950	TGME49_264225			TGME49_211360	TGME49_265140	TGME49_291830	TGME49_268310
TGME49_294240	TGME49_297920			TGME49_231125	TGME49_283882			TGME49_211370	TGME49_265205	TGME49_291005	TGME49_269060
TGME49_294820	TGME49_291910			TGME49_252255	TGME49_316370			TGME49_211380	TGME49_268610	TGME49_289370	TGME49_269225
TGME49_294410	TGME49_203770			TGME49_267670	TGME49_201180			TGME49_211385	TGME49_269970	TGME49_287250	TGME49_269380
TGME49_266610	TGME49_281660			TGME49_278420	TGME49_274170			TGME49_211430	TGME49_271015	TGME49_287040	TGME49_269680
TGME49_224760	TGME49_254060			TGME49_295020	TGME49_208850			TGME49_212045	TGME49_271930	TGME49_286782	TGME49_269860
TGME49_224770	TGME49_252255			TGME49_282200	TGME49_246010			TGME49_212060	TGME49_271935	TGME49_286778	TGME49_270950
TGME49_228050	TGME49_307045			TGME49_292260	TGME49_275355			TGME49_212075	TGME49_272590	TGME49_286150	TGME49_272240
TGME49_278380	TGME49_277060			TGME49_246763	TGME49_318675			TGME49_212160	TGME49_273050	TGME49_283882	TGME49_273510
TGME49_280605	TGME49_238490			TGME49_315798	TGME49_319630			TGME49_212180	TGME49_273310	TGME49_283495	TGME49_274140
TGME49_238210	TGME49_268800			TGME49_227430	TGME49_253755			TGME49_212240	TGME49_273320	TGME49_283490	TGME49_276850
TGME49_217370	TGME49_311485			TGME49_253350	TGME49_212410			TGME49_212810	TGME49_273720	TGME49_283470	TGME49_276860
TGME49_226450	TGME49_207015			TGME49_241710	TGME49_285860			TGME49_212970	TGME49_274030	TGME49_283460	TGME49_276880
TGME49_294595	TGME49_244450			TGME49_309830	TGME49_220080			TGME49_213290	TGME49_275980	TGME49_281970	TGME49_278840
TGME49_320230	TGME49_242110			TGME49_217920	TGME49_294410			TGME49_213360	TGME49_276820	TGME49_281930	TGME49_278965
TGME49_275850	TGME49_301690			TGME49_269310	TGME49_254850			TGME49_213460	TGME49_278005	TGME49_281360	TGME49_285790
TGME49_310580	TGME49_255620			TGME49_301210	TGME49_291910			TGME49_213480	TGME49_278940	TGME49_281350	TGME49_286040
TGME49_230598	TGME49_319360			TGME49_253780	TGME49_200320			TGME49_213530	TGME49_281590	TGME49_280510	TGME49_286540
TGME49_236400	TGME49_281675			TGME49_240880	TGME49_269075			TGME49_213560	TGME49_284040	TGME49_280470	TGME49_288265
TGME49_316130	TGME49_204300			TGME49_231400	TGME49_257945			TGME49_213700	TGME49_284310	TGME49_280465	TGME49_289030
TGME49_273980	TGME49_290590			TGME49_254160	TGME49_249660			TGME49_213840	TGME49_285140	TGME49_279450	TGME49_289060
TGME49_282200	TGME49_269300			TGME49_253790	TGME49_270670			TGME49_213860	TGME49_286460	TGME49_279000	TGME49_289218
TGME49_238440	TGME49_224750			TGME49_240390	TGME49_295440			TGME49_214430	TGME49_286670	TGME49_278430	TGME49_292020
TGME49_217420	TGME49_240370			TGME49_203770	TGME49_279450			TGME49_214510	TGME49_287220	TGME49_278420	TGME49_292350
TGME49_257670	TGME49_248470			TGME49_224230	TGME49_307045			TGME49_214580	TGME49_287470	TGME49_278410	TGME49_293425
TGME49_236290	TGME49_204010			TGME49_281440	TGME49_313660			TGME49_214835	TGME49_288030	TGME49_278400	TGME49_293620
TGME49_297920	TGME49_270680			TGME49_278400	TGME49_278240			TGME49_215180	TGME49_288880	TGME49_278390	TGME49_293830
TGME49_291910	TGME49_235315			TGME49_222080	TGME49_312690			TGME49_215185	TGME49_289590	TGME49_278380	TGME49_296020
TGME49_311490	TGME49_309300			TGME49_286020	TGME49_266675			TGME49_215195	TGME49_291170	TGME49_278370	TGME49_297290
TGME49_257000	TGME49_238980			TGME49_210450	TGME49_309860			TGME49_215320	TGME49_291650	TGME49_278360	TGME49_297300
TGME49_297065	TGME49_222080			TGME49_216200	TGME49_320200			TGME49_215328	TGME49_293740	TGME49_278350	TGME49_297910
TGME49_276920	TGME49_270670			TGME49_248470	TGME49_314330			TGME49_215343	TGME49_294390	TGME49_278340	TGME49_298590
TGME49_203770	TGME49_224680			TGME49_234200	TGME49_305610			TGME49_215410	TGME49_294805	TGME49_278330	TGME49_299790
TGME49_281660	TGME49_243378			TGME49_256700	TGME49_210260			TGME49_215500	TGME49_295100	TGME49_278320	TGME49_299800
TGME49_254060	TGME49_293500			TGME49_313840	TGME49_229405			TGME49_215670	TGME49_297395	TGME49_278300	TGME49_305280
TGME49_252255	TGME49_222188			TGME49_278410	TGME49_289170			TGME49_215900	TGME49_297850	TGME49_278290	TGME49_309410
TGME49_307045	TGME49_212410			TGME49_273980	TGME49_260310			TGME49_216053	TGME49_297900	TGME49_278245	TGME49_309530
TGME49_277060	TGME49_212420			TGME49_254890	TGME49_212420			TGME49_216150	TGME49_300300	TGME49_278240	TGME49_309540
TGME49_238490	TGME49_292260			TGME49_225435	TGME49_219660			TGME49_216280	TGME49_304930	TGME49_278180	TGME49_310340
TGME49_268800	TGME49_235010			TGME49_213480	TGME49_223560			TGME49_216285	TGME49_309185	TGME49_278100	TGME49_311710
TGME49_311485	TGME49_254850			TGME49_310177	TGME49_295430			TGME49_216610	TGME49_313665	TGME49_278090	TGME49_313000
TGME49_207015	TGME49_229405			TGME49_320610	TGME49_276960			TGME49_216640	TGME49_315123	TGME49_277572	TGME49_314482
TGME49_244450	TGME49_307030			TGME49_232400	TGME49_300990			TGME49_216965	TGME49_315440	TGME49_277230	TGME49_316190
TGME49_291920	TGME49_208020			TGME49_307030	TGME49_239475			TGME49_217410	TGME49_315495	TGME49_276980	TGME49_316550
TGME49_242110	TGME49_286000			TGME49_240370	TGME49_306480			TGME49_217420	TGME49_320150	TGME49_275660	TGME49_316560
TGME49_301690	TGME49_243382			TGME49_206650	TGME49_278245			TGME49_217610	TGME49_325800	TGME49_275380	TGME49_316780
TGME49_270655	TGME49_274170			TGME49_286000	TGME49_294820			TGME49_217630	TGME49_205480	TGME49_275355	TGME49_320280
TGME49_315715	TGME49_318610			TGME49_310520	TGME49_265030			TGME49_217650	TGME49_270655	TGME49_274170	TGME49_320530
TGME49_255620	TGME49_295430			TGME49_270680	TGME49_314570			TGME49_217722	TGME49_288970	TGME49_273980	TGME49_320710
TGME49_319360	TGME49_223560			TGME49_232520				TGME49_217724	TGME49_304450	TGME49_273340	TGME49_321390
TGME49_281675	TGME49_295390			TGME49_248200				TGME49_217800	TGME49_306500	TGME49_273110	TGME49_321460
TGME49_243680	TGME49_295440			TGME49_319380				TGME49_217860	TGME49_306620	TGME49_271980	TGME49_220420
TGME49_204300	TGME49_276980			TGME49_264225				TGME49_217920	TGME49_311850	TGME49_271210	TGME49_242600
TGME49_290590	TGME49_306570			TGME49_288320				TGME49_217940	TGME49_313890	TGME49_270660	TGME49_315260
TGME49_269300	TGME49_254320			TGME49_293490				TGME49_217961	TGME49_314250	TGME49_269365	TGME49_215895
TGME49_295720	TGME49_281470			TGME49_230905				TGME49_218195	TGME49_320260	TGME49_269110	TGME49_315730
TGME49_224750	TGME49_318675			TGME49_299820				TGME49_218210	TGME49_321800	TGME49_268930	TGME49_287510
TGME49_240370	TGME49_267308			TGME49_291070				TGME49_218215	TGME49_202445	TGME49_268800	TGME49_212740
TGME49_248470	TGME49_204500			TGME49_283882				TGME49_218290	TGME49_203682	TGME49_268270	TGME49_262940
TGME49_266600	TGME49_235000			TGME49_319695				TGME49_218400	TGME49_203685	TGME49_267980	TGME49_288520
TGME49_202580	TGME49_278090			TGME49_316370				TGME49_218470	TGME49_203688	TGME49_267680	TGME49_315550
TGME49_202010	TGME49_266270			TGME49_201180				TGME49_218500	TGME49_206910	TGME49_267470	TGME49_315540
TGME49_204010	TGME49_285940			TGME49_278230				TGME49_218890	TGME49_209530	TGME49_266710	TGME49_203375
TGME49_298070	TGME49_243190			TGME49_267470				TGME49_218900	TGME49_210095	TGME49_266650	TGME49_247310
TGME49_260480	TGME49_275355			TGME49_274170				TGME49_219610	TGME49_210600	TGME49_266600	TGME49_266770
TGME49_276200	TGME49_221420			TGME49_272440				TGME49_219650	TGME49_211610	TGME49_266500	TGME49_239430
TGME49_314340	TGME49_286020			TGME49_318500				TGME49_219660	TGME49_220560	TGME49_266340	TGME49_202285
TGME49_270680	TGME49_230602			TGME49_295720				TGME49_220080	TGME49_220650	TGME49_266335	TGME49_209620
TGME49_288475	TGME49_268970			TGME49_256220				TGME49_220340	TGME49_221550	TGME49_266330	TGME49_223700
TGME49_235315	TGME49_307590			TGME49_208850				TGME49_220840	TGME49_223025	TGME49_266065	TGME49_205658
TGME49_256800	TGME49_253755			TGME49_276880				TGME49_221265	TGME49_223430	TGME49_265320	TGME49_264070
TGME49_307070	TGME49_211370			TGME49_246010				TGME49_221420	TGME49_224575	TGME49_265030	TGME49_206400
TGME49_306500	TGME49_270210			TGME49_309950				TGME49_221665	TGME49_224730	TGME49_264630	TGME49_313950
TGME49_309300	TGME49_278370			TGME49_313665				TGME49_221685	TGME49_225540	TGME49_263350	TGME49_212275
TGME49_238980	TGME49_202060			TGME49_291010				TGME49_221830	TGME49_227780	TGME49_262470	TGME49_222940
TGME49_222080	TGME49_305790			TGME49_305800				TGME49_221930	TGME49_228690	TGME49_261530	TGME49_315100
TGME49_270670	TGME49_213460			TGME49_268390				TGME49_222340	TGME49_231090	TGME49_260460	TGME49_239120
TGME49_224680	TGME49_320680			TGME49_232390				TGME49_222385	TGME49_231815	TGME49_259890	TGME49_239520
TGME49_243378	TGME49_217720			TGME49_318750				TGME49_222420	TGME49_231860	TGME49_259410	TGME49_307790
TGME49_232770	TGME49_279450			TGME49_315740				TGME49_222700	TGME49_235580	TGME49_259300	TGME49_293850
TGME49_293500	TGME49_200320			TGME49_205410				TGME49_222975	TGME49_235990	TGME49_259290	TGME49_224710
TGME49_222188	TGME49_320200			TGME49_275355				TGME49_222980	TGME49_237700	TGME49_259270	TGME49_224140
TGME49_212410	TGME49_240390			TGME49_318675				TGME49_223120	TGME49_240260	TGME49_258840	TGME49_287490
TGME49_275795	TGME49_203590			TGME49_319630				TGME49_223258	TGME49_242900	TGME49_258575	TGME49_231090
TGME49_202910	TGME49_311380			TGME49_202930				TGME49_223262	TGME49_243240	TGME49_257572	TGME49_282020
TGME49_212420	TGME49_285860			TGME49_253755				TGME49_223480	TGME49_244335	TGME49_257568	TGME49_315090
TGME49_292260	TGME49_278240			TGME49_202280				TGME49_223560	TGME49_248730	TGME49_256788	TGME49_203250
TGME49_267470	TGME49_206660			TGME49_223430				TGME49_224010	TGME49_249520	TGME49_255480	TGME49_248730
TGME49_235010	TGME49_214430			TGME49_212410				TGME49_224040	TGME49_250020	TGME49_255460	TGME49_228430
TGME49_254850	TGME49_319380			TGME49_292375				TGME49_224080	TGME49_251580	TGME49_254890	TGME49_239580
TGME49_268310	TGME49_214190			TGME49_220585				TGME49_224680	TGME49_251665	TGME49_254760	TGME49_272020
TGME49_307050	TGME49_283882			TGME49_243390				TGME49_224770	TGME49_252065	TGME49_254430	TGME49_259205
TGME49_216200	TGME49_294785			TGME49_253770				TGME49_224780	TGME49_253340	TGME49_254060	TGME49_278460
TGME49_204290	TGME49_240880			TGME49_255310				TGME49_224810	TGME49_253670	TGME49_252860	TGME49_297280
TGME49_229405	TGME49_273110			TGME49_240500				TGME49_224932	TGME49_254830	TGME49_251910	TGME49_286670
TGME49_307030	TGME49_264260			TGME49_285860				TGME49_225028	TGME49_257810	TGME49_251900	TGME49_214570
TGME49_208020	TGME49_201180			TGME49_297080				TGME49_225070	TGME49_257970	TGME49_250920	TGME49_208380
TGME49_267130	TGME49_289170			TGME49_220080				TGME49_225098	TGME49_258370	TGME49_249510	TGME49_244260
TGME49_286000	TGME49_315345			TGME49_267520				TGME49_225102	TGME49_258810	TGME49_248470	TGME49_225400
TGME49_243382	TGME49_267460			TGME49_294410				TGME49_225140	TGME49_260375	TGME49_248425	TGME49_212030
TGME49_274170	TGME49_245746			TGME49_316690				TGME49_225370	TGME49_262940	TGME49_248210	TGME49_215885
TGME49_318610	TGME49_294651			TGME49_254850				TGME49_225570	TGME49_263639	TGME49_247660	TGME49_203890
TGME49_295430	TGME49_214580			TGME49_256650				TGME49_225950	TGME49_267790	TGME49_247560	TGME49_309550
TGME49_223560	TGME49_265030			TGME49_305560				TGME49_225953	TGME49_269310	TGME49_246110	TGME49_239570
TGME49_309830	TGME49_212160			TGME49_255245				TGME49_225955	TGME49_270450	TGME49_246070	TGME49_319890
TGME49_295390	TGME49_278245			TGME49_300980				TGME49_226100	TGME49_271335	TGME49_245600	TGME49_276870
TGME49_269310	TGME49_306510			TGME49_242610				TGME49_226110	TGME49_273100	TGME49_244900	TGME49_227100
TGME49_295440	TGME49_249510			TGME49_291910				TGME49_226245	TGME49_273915	TGME49_244450	TGME49_313025
TGME49_276980	TGME49_278390			TGME49_259600				TGME49_226300	TGME49_277780	TGME49_244180	TGME49_210682
TGME49_306570	TGME49_320090			TGME49_200320				TGME49_226610	TGME49_278400	TGME49_243940	TGME49_310260
TGME49_254320	TGME49_301150			TGME49_269075				TGME49_227370	TGME49_278680	TGME49_243382	TGME49_237893
TGME49_281470	TGME49_222420			TGME49_313890				TGME49_228050	TGME49_278882	TGME49_243378	TGME49_305930
TGME49_314250	TGME49_272730			TGME49_289230				TGME49_228160	TGME49_287450	TGME49_243190	TGME49_248425
TGME49_318675	TGME49_235180			TGME49_214760				TGME49_228175	TGME49_287460	TGME49_243180	TGME49_289027
TGME49_267308	TGME49_318220			TGME49_278630				TGME49_228220	TGME49_291860	TGME49_243170	TGME49_233390
TGME49_204500	TGME49_214420			TGME49_257945				TGME49_228240	TGME49_292290	TGME49_243160	TGME49_216940
TGME49_219742	TGME49_280465			TGME49_249660				TGME49_228410	TGME49_295140	TGME49_243150	TGME49_239640
TGME49_235000	TGME49_254890			TGME49_270670				TGME49_228500	TGME49_295945	TGME49_243140	TGME49_228440
TGME49_278090	TGME49_316370			TGME49_210245				TGME49_228510	TGME49_296340	TGME49_243130	TGME49_211320
TGME49_223060	TGME49_202255			TGME49_268670				TGME49_228680	TGME49_297280	TGME49_243120	TGME49_232475
TGME49_229730	TGME49_260310			TGME49_246910				TGME49_229405	TGME49_297488	TGME49_243110	TGME49_217040
TGME49_276880	TGME49_217724			TGME49_273595				TGME49_229910	TGME49_300612	TGME49_243100	TGME49_316290
TGME49_266270	TGME49_218400			TGME49_295440				TGME49_229915	TGME49_300613	TGME49_241165	TGME49_272680
TGME49_285940	TGME49_300990			TGME49_229720				TGME49_230020	TGME49_300980	TGME49_239090	TGME49_211675
TGME49_278760	TGME49_215180			TGME49_274090				TGME49_230135	TGME49_301140	TGME49_238915	TGME49_271220
TGME49_307090	TGME49_308820			TGME49_279450				TGME49_230200	TGME49_301998	TGME49_238850	TGME49_236900
TGME49_243190	TGME49_225070			TGME49_307045				TGME49_230460	TGME49_302055	TGME49_238530	TGME49_319680
TGME49_254160	TGME49_316635			TGME49_329800				TGME49_230555	TGME49_306270	TGME49_238520	TGME49_203090
TGME49_275355				TGME49_313660				TGME49_230602	TGME49_306455	TGME49_238500	TGME49_312540
TGME49_209985				TGME49_278240				TGME49_230605	TGME49_308096	TGME49_238490	TGME49_285920
TGME49_221420				TGME49_288520				TGME49_230660	TGME49_309110	TGME49_238480	TGME49_233792
TGME49_286020				TGME49_312690				TGME49_230663	TGME49_309990	TGME49_238470	TGME49_202205
TGME49_248140				TGME49_283878				TGME49_230670	TGME49_310650	TGME49_238460	TGME49_255380
TGME49_230602				TGME49_213780				TGME49_230830	TGME49_310920	TGME49_238440	TGME49_231055
TGME49_202050				TGME49_203740				TGME49_230900	TGME49_313440	TGME49_237810	TGME49_268700
TGME49_268970				TGME49_301160				TGME49_231175	TGME49_313848	TGME49_237800	TGME49_239650
TGME49_307590				TGME49_262380				TGME49_231470	TGME49_315340	TGME49_237595	TGME49_222935
TGME49_268300				TGME49_319690				TGME49_231605	TGME49_315520	TGME49_237080	TGME49_214545
TGME49_253755				TGME49_285170				TGME49_231610	TGME49_315900	TGME49_237070	TGME49_226532
TGME49_219570				TGME49_266675				TGME49_231620	TGME49_316290	TGME49_236940	TGME49_207780
TGME49_301210				TGME49_210235				TGME49_231770	TGME49_318650	TGME49_236290	TGME49_300370
TGME49_211370				TGME49_271280				TGME49_231865	TGME49_318750	TGME49_235390	TGME49_248673
TGME49_250220				TGME49_314750				TGME49_231900	TGME49_320780	TGME49_235010	TGME49_260375
TGME49_270210				TGME49_230110				TGME49_231998	TGME49_321685	TGME49_235000	TGME49_292600
TGME49_213880				TGME49_201820				TGME49_232140	TGME49_321700	TGME49_234940	TGME49_290585
TGME49_210095				TGME49_305490				TGME49_232170	TGME49_321710	TGME49_234380	TGME49_219110
TGME49_278370				TGME49_239610				TGME49_232420	TGME49_200230	TGME49_234060	TGME49_217490
TGME49_202060				TGME49_309860				TGME49_232950	TGME49_200240	TGME49_233370	TGME49_240620
TGME49_319690				TGME49_269320				TGME49_233040	TGME49_200250	TGME49_233360	TGME49_271375
TGME49_224845				TGME49_312370				TGME49_233050	TGME49_202020	TGME49_233330	TGME49_306334
TGME49_281400				TGME49_288590				TGME49_233065	TGME49_202025	TGME49_232580	TGME49_231050
TGME49_228065				TGME49_267390				TGME49_233150	TGME49_202030	TGME49_231880	TGME49_219610
TGME49_253770				TGME49_320200				TGME49_233153	TGME49_204040	TGME49_231390	TGME49_225953
TGME49_266670				TGME49_220330				TGME49_233180	TGME49_204420	TGME49_231110	TGME49_209583
TGME49_278400				TGME49_239270				TGME49_233210	TGME49_205110	TGME49_231060	TGME49_228620
TGME49_230640				TGME49_225880				TGME49_233270	TGME49_207130	TGME49_230667	TGME49_225028
TGME49_305790				TGME49_203682				TGME49_233280	TGME49_207160	TGME49_229320	TGME49_209610
TGME49_288520				TGME49_312350				TGME49_233320	TGME49_207210	TGME49_229270	TGME49_210678
TGME49_213460				TGME49_223130				TGME49_233610	TGME49_207430	TGME49_229240	TGME49_323200
TGME49_321710				TGME49_226820				TGME49_233792	TGME49_209180	TGME49_229230	TGME49_237900
TGME49_263030				TGME49_320015				TGME49_233940	TGME49_209755	TGME49_228420	TGME49_323700
TGME49_320680				TGME49_314330				TGME49_233960	TGME49_209985	TGME49_228310	TGME49_323800
TGME49_306630				TGME49_305610				TGME49_234375	TGME49_215090	TGME49_226450	TGME49_323600
TGME49_263020				TGME49_210260				TGME49_234570	TGME49_216140	TGME49_226385	TGME49_237894
TGME49_217720				TGME49_229405				TGME49_235180	TGME49_219742	TGME49_224905	TGME49_207650
TGME49_292600				TGME49_212760				TGME49_235200	TGME49_221295	TGME49_224790	TGME49_279440
TGME49_279450				TGME49_217620				TGME49_235315	TGME49_221840	TGME49_224760	TGME49_256040
TGME49_200320				TGME49_213720				TGME49_235650	TGME49_222160	TGME49_224750	TGME49_266130
TGME49_278882				TGME49_289170				TGME49_235860	TGME49_224630	TGME49_223830	TGME49_212710
TGME49_320200				TGME49_260310				TGME49_235870	TGME49_225820	TGME49_223550	TGME49_237860
TGME49_240390				TGME49_296340				TGME49_235875	TGME49_227010	TGME49_223030	TGME49_254180
TGME49_203590				TGME49_292360				TGME49_235950	TGME49_228390	TGME49_222188	TGME49_301140
TGME49_311380				TGME49_300380				TGME49_236020	TGME49_231990	TGME49_222080	TGME49_258810
TGME49_229720				TGME49_212420				TGME49_236050	TGME49_232400	TGME49_221560	TGME49_234370
TGME49_315520				TGME49_267530				TGME49_236120	TGME49_233920	TGME49_219828	TGME49_263410
TGME49_230650				TGME49_291940				TGME49_236400	TGME49_238077	TGME49_219742	TGME49_267410
TGME49_243700				TGME49_246750				TGME49_236595	TGME49_238440	TGME49_219370	TGME49_278120
TGME49_285860				TGME49_223095				TGME49_237045	TGME49_238850	TGME49_219348	TGME49_306450
TGME49_278240				TGME49_308990				TGME49_237060	TGME49_240470	TGME49_217720	TGME49_205402
TGME49_240290				TGME49_265170				TGME49_237195	TGME49_240755	TGME49_217710	TGME49_297820
TGME49_310520				TGME49_206680				TGME49_237425	TGME49_245530	TGME49_217390	TGME49_257010
TGME49_263220				TGME49_236990				TGME49_237490	TGME49_249535	TGME49_217380	TGME49_261560
TGME49_315910				TGME49_313050				TGME49_237510	TGME49_250220	TGME49_217370	TGME49_294600
TGME49_294805				TGME49_219660				TGME49_237585	TGME49_252640	TGME49_214420	TGME49_255710
TGME49_319695				TGME49_223560				TGME49_238220	TGME49_254600	TGME49_214190	TGME49_203720
TGME49_206660				TGME49_276200				TGME49_238960	TGME49_255460	TGME49_214070	TGME49_259670
TGME49_295690				TGME49_248140				TGME49_238970	TGME49_255890	TGME49_213850	TGME49_288220
TGME49_214430				TGME49_211470				TGME49_238980	TGME49_258105	TGME49_213430	TGME49_266860
TGME49_311390				TGME49_294812				TGME49_239110	TGME49_258140	TGME49_212937	TGME49_203830
TGME49_278878				TGME49_203020				TGME49_239365	TGME49_259020	TGME49_212420	TGME49_265060
TGME49_239310				TGME49_288580				TGME49_239475	TGME49_260190	TGME49_212410	TGME49_264170
TGME49_207600				TGME49_209020				TGME49_239510	TGME49_260205	TGME49_211280	TGME49_293560
TGME49_214760				TGME49_278365				TGME49_239520	TGME49_260325	TGME49_210740	TGME49_318275
TGME49_319380				TGME49_321900				TGME49_239550	TGME49_260530	TGME49_210330	TGME49_222260
TGME49_214190				TGME49_262750				TGME49_239650	TGME49_262655	TGME49_210320	TGME49_308965
TGME49_283882				TGME49_239320				TGME49_239660	TGME49_262970	TGME49_210260	TGME49_226515
TGME49_235515				TGME49_295010				TGME49_239670	TGME49_263720	TGME49_210095	TGME49_292100
TGME49_294785				TGME49_209460				TGME49_239730	TGME49_264430	TGME49_209985	TGME49_315480
TGME49_240880				TGME49_205060				TGME49_239795	TGME49_265255	TGME49_209515	TGME49_322020
TGME49_220585				TGME49_295430				TGME49_239810	TGME49_266600	TGME49_209470	TGME49_293490
TGME49_227430				TGME49_276960				TGME49_239855	TGME49_267670	TGME49_208850	TGME49_233315
TGME49_300790				TGME49_300990				TGME49_239880	TGME49_268650	TGME49_207965	TGME49_230905
TGME49_304930				TGME49_225250				TGME49_240200	TGME49_268765	TGME49_207790	TGME49_233950
TGME49_301218				TGME49_225430				TGME49_240230	TGME49_268860	TGME49_207780	TGME49_262890
TGME49_219640				TGME49_305620				TGME49_240240	TGME49_271033	TGME49_207730	TGME49_317705
TGME49_315900				TGME49_278100				TGME49_240295	TGME49_271320	TGME49_207250	TGME49_248330
TGME49_272440				TGME49_249160				TGME49_240310	TGME49_273350	TGME49_207015	TGME49_219640
TGME49_225435				TGME49_311390				TGME49_240325	TGME49_278080	TGME49_207010	TGME49_248430
TGME49_313385				TGME49_239475				TGME49_240330	TGME49_279315	TGME49_207005	TGME49_214760
TGME49_285825				TGME49_299070				TGME49_240340	TGME49_280570	TGME49_206660	TGME49_258880
TGME49_273110				TGME49_289960				TGME49_240350	TGME49_280580	TGME49_206620	TGME49_248677
TGME49_286740				TGME49_220650				TGME49_240365	TGME49_281955	TGME49_205480	TGME49_227090
TGME49_237450				TGME49_262940				TGME49_240370	TGME49_284615	TGME49_205390	TGME49_247025
TGME49_215680				TGME49_202910				TGME49_240390	TGME49_286740	TGME49_205210	TGME49_311670
TGME49_309865				TGME49_273640				TGME49_240580	TGME49_287040	TGME49_204870	TGME49_251710
TGME49_264260				TGME49_253800				TGME49_240790	TGME49_289180	TGME49_204500	TGME49_205430
TGME49_201180				TGME49_297925				TGME49_240800	TGME49_289370	TGME49_204000	TGME49_224180
TGME49_273300				TGME49_245650				TGME49_240880	TGME49_290000	TGME49_203590	TGME49_281600
TGME49_289170				TGME49_249310				TGME49_242110	TGME49_291040	TGME49_203580	TGME49_288450
TGME49_314550				TGME49_245520				TGME49_242240	TGME49_292390	TGME49_203500	TGME49_248900
TGME49_295730				TGME49_240450				TGME49_242300	TGME49_293780	TGME49_203340	TGME49_267030
TGME49_266480				TGME49_306480				TGME49_242350	TGME49_293790	TGME49_202930	TGME49_300601
TGME49_315345				TGME49_215400				TGME49_242360	TGME49_295662	TGME49_202110	TGME49_264182
TGME49_267460				TGME49_314660				TGME49_242370	TGME49_299015	TGME49_202100	TGME49_313650
TGME49_245746				TGME49_320720				TGME49_242390	TGME49_300130	TGME49_202090	TGME49_216710
TGME49_255870				TGME49_281460				TGME49_242400	TGME49_304920	TGME49_202065
TGME49_240930				TGME49_307605				TGME49_242710	TGME49_306860	TGME49_202060
TGME49_287260				TGME49_263820				TGME49_242740	TGME49_309930	TGME49_202050
TGME49_294651				TGME49_304910				TGME49_242750	TGME49_313050	TGME49_201180
TGME49_267980				TGME49_244870				TGME49_242760	TGME49_318880	TGME49_201100
TGME49_214580				TGME49_313710				TGME49_243330	TGME49_319090	TGME49_200480
TGME49_212760				TGME49_273430				TGME49_243500	TGME49_320190	TGME49_200320
TGME49_255715				TGME49_259220				TGME49_243550	TGME49_320270	TGME49_200270
TGME49_315740				TGME49_315110				TGME49_243560	TGME49_264660	TGME49_200250
TGME49_265030				TGME49_257780				TGME49_243670	TGME49_290970	TGME49_200240
TGME49_281460				TGME49_319658				TGME49_243740	TGME49_208730	TGME49_200230
TGME49_315330				TGME49_305770				TGME49_244030	TGME49_224170	TGME49_320250
TGME49_212160				TGME49_200240				TGME49_244412	TGME49_323320	TGME49_306050
TGME49_254330				TGME49_239600				TGME49_244440	TGME49_225290	TGME49_295662
TGME49_278245				TGME49_267480				TGME49_244590	TGME49_207350	TGME49_236975
TGME49_205210				TGME49_246630				TGME49_244620	TGME49_292275	TGME49_232400
TGME49_216830				TGME49_203440				TGME49_244890	TGME49_312240	TGME49_216155
TGME49_306510				TGME49_225360				TGME49_245440	TGME49_312330
TGME49_249510				TGME49_206490				TGME49_245746	TGME49_220720
TGME49_293490				TGME49_278245				TGME49_245752	TGME49_292270
TGME49_318750				TGME49_233925				TGME49_246010	TGME49_231992
TGME49_278390				TGME49_273830				TGME49_246555	TGME49_292375
TGME49_216190				TGME49_249215				TGME49_246635	TGME49_284420
TGME49_320090				TGME49_244160				TGME49_246650	TGME49_287430
TGME49_263215				TGME49_203120				TGME49_246760	TGME49_294400
TGME49_301150				TGME49_294820				TGME49_247010	TGME49_301890
TGME49_222420				TGME49_207760				TGME49_247270	TGME49_220640
TGME49_224230				TGME49_237600				TGME49_247340	TGME49_287440
TGME49_272730				TGME49_202490				TGME49_247500	TGME49_267130
TGME49_215390				TGME49_240400				TGME49_247570	TGME49_253790
TGME49_235180				TGME49_243750				TGME49_247950	TGME49_323310
TGME49_288290				TGME49_306520				TGME49_247970	TGME49_245540
TGME49_288320				TGME49_213880				TGME49_248170	TGME49_245770
TGME49_236990				TGME49_203830				TGME49_248225	TGME49_322110
TGME49_277770				TGME49_206300				TGME49_248240	TGME49_253680
TGME49_208980				TGME49_239590				TGME49_248350	TGME49_264150
TGME49_258880				TGME49_244350				TGME49_248440
TGME49_318220				TGME49_293650				TGME49_248590
TGME49_214420				TGME49_295000				TGME49_248760
TGME49_218390				TGME49_273580				TGME49_248970
TGME49_250020				TGME49_220150				TGME49_249040
TGME49_253760				TGME49_262935				TGME49_249150
TGME49_276810				TGME49_253740				TGME49_249280
TGME49_234930				TGME49_233310				TGME49_249290
TGME49_240550				TGME49_315958				TGME49_249365
TGME49_278100				TGME49_311410				TGME49_249660
TGME49_280465				TGME49_259210				TGME49_249960
TGME49_203120				TGME49_309570				TGME49_249980
TGME49_318490				TGME49_284310				TGME49_250685
TGME49_213720				TGME49_243910				TGME49_251420
TGME49_300980				TGME49_264880				TGME49_251430
TGME49_204520				TGME49_316120				TGME49_251550
TGME49_241710				TGME49_253420				TGME49_251750
TGME49_247540				TGME49_252230				TGME49_251820
TGME49_236980				TGME49_215895				TGME49_251830
TGME49_286670				TGME49_228180				TGME49_251857
TGME49_246910				TGME49_295690				TGME49_251870
TGME49_291010				TGME49_240770				TGME49_251940
TGME49_208570				TGME49_273720				TGME49_251958
TGME49_203440				TGME49_295035				TGME49_251962
TGME49_235890				TGME49_311650				TGME49_252070
TGME49_242650				TGME49_281400				TGME49_252255
TGME49_254890				TGME49_247470				TGME49_252260
TGME49_233925				TGME49_309865				TGME49_252300
TGME49_239610				TGME49_265860				TGME49_252370
TGME49_240255				TGME49_225130				TGME49_252395
TGME49_273915				TGME49_209010				TGME49_252890
TGME49_316370				TGME49_266850				TGME49_253110
TGME49_224250				TGME49_266730				TGME49_253120
TGME49_217726				TGME49_316110				TGME49_253150
TGME49_297980				TGME49_315900				TGME49_253390
TGME49_320525				TGME49_251660				TGME49_253500
TGME49_210750				TGME49_241140				TGME49_253550
TGME49_205410				TGME49_268400				TGME49_253580
TGME49_222180				TGME49_315330				TGME49_253660
TGME49_305120				TGME49_297150				TGME49_253755
TGME49_263340				TGME49_215660				TGME49_253920
TGME49_286610				TGME49_309990				TGME49_254180
TGME49_226755				TGME49_265030				TGME49_254190
TGME49_305490				TGME49_257100				TGME49_254310
TGME49_259580				TGME49_318275				TGME49_254320
TGME49_246030				TGME49_259690				TGME49_254590
TGME49_268685				TGME49_305840				TGME49_254625
TGME49_255370				TGME49_207720				TGME49_254750
TGME49_270630				TGME49_273815				TGME49_254850
TGME49_263830				TGME49_210750				TGME49_254855
TGME49_318275				TGME49_320620				TGME49_254960
TGME49_245650				TGME49_213752				TGME49_255200
TGME49_329000				TGME49_203370				TGME49_255490
TGME49_245770				TGME49_314570				TGME49_255500
TGME49_223430				TGME49_281620				TGME49_255620
TGME49_240450				TGME49_276990				TGME49_255730
TGME49_288280				TGME49_296015				TGME49_256020
TGME49_225105				TGME49_234940				TGME49_256080
TGME49_234180				TGME49_236850				TGME49_256850
TGME49_243910				TGME49_263660				TGME49_256865
TGME49_221890				TGME49_221675				TGME49_257130
TGME49_202255				TGME49_246190				TGME49_257690
TGME49_300300				TGME49_215550				TGME49_257910
TGME49_254335				TGME49_282070				TGME49_257925
TGME49_305630				TGME49_203930				TGME49_257945
TGME49_239020				TGME49_278850				TGME49_258120
TGME49_271335				TGME49_319600				TGME49_258512
TGME49_293650				TGME49_314260				TGME49_258520
TGME49_250360				TGME49_211650				TGME49_258530
TGME49_208090				TGME49_293730				TGME49_258670
TGME49_202920				TGME49_213340				TGME49_258910
TGME49_260310				TGME49_312150				TGME49_259030
TGME49_214780				TGME49_312950				TGME49_259150
TGME49_217724				TGME49_224520				TGME49_259155
TGME49_270920				TGME49_315780				TGME49_259180
TGME49_262935				TGME49_269425				TGME49_259280
TGME49_248780				TGME49_250820				TGME49_259670
TGME49_218400				TGME49_261955				TGME49_259960
TGME49_305930				TGME49_208400				TGME49_259965
TGME49_300990				TGME49_222100				TGME49_260000
TGME49_257560				TGME49_315570				TGME49_260310
TGME49_295350				TGME49_210345				TGME49_260830
TGME49_234507				TGME49_235380				TGME49_261040
TGME49_273430				TGME49_215010				TGME49_261630
TGME49_254340				TGME49_215775				TGME49_262440
TGME49_265810				TGME49_293760				TGME49_262575
TGME49_267670				TGME49_258660				TGME49_262800
TGME49_270700				TGME49_315360				TGME49_263380
TGME49_210482				TGME49_232020				TGME49_264100
TGME49_243240				TGME49_215580				TGME49_264178
TGME49_217620				TGME49_221818				TGME49_264225
TGME49_234200				TGME49_244470				TGME49_264260
TGME49_250500				TGME49_274120				TGME49_264485
TGME49_255210				TGME49_280400				TGME49_264700
TGME49_309020				TGME49_231160				TGME49_265050
TGME49_206680				TGME49_263200				TGME49_265065
TGME49_310090				TGME49_310235				TGME49_265100
TGME49_223685				TGME49_324600				TGME49_265430
TGME49_292375				TGME49_305130				TGME49_266035
TGME49_297647				TGME49_321600				TGME49_266040
TGME49_215180				TGME49_200385				TGME49_266105
TGME49_266070				TGME49_285425				TGME49_266130
TGME49_240780				TGME49_306350				TGME49_266270
TGME49_308820				TGME49_252210				TGME49_266610
TGME49_314650				TGME49_216460				TGME49_266660
TGME49_208990				TGME49_248560				TGME49_266675
TGME49_285800				TGME49_224710				TGME49_266700
TGME49_246670				TGME49_215530				TGME49_266740
TGME49_225070				TGME49_237510				TGME49_266785
TGME49_281930				TGME49_315470				TGME49_267150
TGME49_315885				TGME49_273970				TGME49_267308
TGME49_288990				TGME49_253100				TGME49_267460
TGME49_257640				TGME49_255700				TGME49_267875
TGME49_246750				TGME49_286540				TGME49_268020
TGME49_249190				TGME49_251740				TGME49_268035
TGME49_252230				TGME49_252500				TGME49_268190
TGME49_254860				TGME49_233030				TGME49_268225
TGME49_210787				TGME49_310240				TGME49_268230
TGME49_232230				TGME49_216620				TGME49_268820
TGME49_316635				TGME49_270975				TGME49_268970
TGME49_320610				TGME49_221370				TGME49_269035
TGME49_305770				TGME49_239620				TGME49_269075
TGME49_269175				TGME49_237210				TGME49_269100
TGME49_278230				TGME49_297960				TGME49_269120
TGME49_251660				TGME49_201630				TGME49_269270
TGME49_250900				TGME49_250000				TGME49_269300
TGME49_269800				TGME49_255160				TGME49_269350
TGME49_263820				TGME49_201740				TGME49_269400
TGME49_218955				TGME49_231640				TGME49_269582
TGME49_269460				TGME49_271930				TGME49_269600
TGME49_285425				TGME49_316340				TGME49_269640
TGME49_315760				TGME49_286580				TGME49_269850
TGME49_211720				TGME49_215785				TGME49_269930
TGME49_280480				TGME49_267500				TGME49_270210
TGME49_232130				TGME49_214070				TGME49_270340
TGME49_265650				TGME49_313480				TGME49_270580
TGME49_232670				TGME49_216090				TGME49_270670
TGME49_205280				TGME49_308010				TGME49_270680
TGME49_246950				TGME49_294560				TGME49_270820
TGME49_285810				TGME49_220900				TGME49_270850
TGME49_214970				TGME49_315770				TGME49_271010
TGME49_248690				TGME49_265650				TGME49_271040
TGME49_208030				TGME49_216080				TGME49_271285
TGME49_258410				TGME49_241010				TGME49_271310
TGME49_201630				TGME49_304730				TGME49_271892
TGME49_291180				TGME49_254070				TGME49_272200
TGME49_231215				TGME49_218955				TGME49_272260
TGME49_259630				TGME49_267140				TGME49_272280
TGME49_221630				TGME49_277250				TGME49_272360
TGME49_205658				TGME49_289710				TGME49_272415
TGME49_295030				TGME49_269340				TGME49_272430
TGME49_266300				TGME49_289910				TGME49_272540
TGME49_312600				TGME49_201520				TGME49_272620
TGME49_262010				TGME49_244720				TGME49_272730
TGME49_290970				TGME49_306370				TGME49_272890
TGME49_288930				TGME49_235690				TGME49_272905
TGME49_301420				TGME49_201860				TGME49_273065
TGME49_225690				TGME49_280700				TGME49_273120
TGME49_315190				TGME49_219175				TGME49_273468
TGME49_320030				TGME49_261250				TGME49_273472
TGME49_271970				TGME49_223920				TGME49_273530
TGME49_201760				TGME49_209250				TGME49_273740
TGME49_315320				TGME49_309100				TGME49_273750
TGME49_234430				TGME49_243690				TGME49_274020
TGME49_271260				TGME49_244660				TGME49_274040
TGME49_228980				TGME49_314358				TGME49_274080
TGME49_233380				TGME49_262730				TGME49_274700
TGME49_219500				TGME49_288030				TGME49_275360
TGME49_219175				TGME49_240460				TGME49_275600
TGME49_312300				TGME49_243250				TGME49_275710
TGME49_265320				TGME49_278815				TGME49_275760
TGME49_246760				TGME49_285870				TGME49_275790
TGME49_201785				TGME49_271880				TGME49_275798
TGME49_270865				TGME49_244710				TGME49_275850
TGME49_315160				TGME49_288045				TGME49_276960
TGME49_294790				TGME49_209490				TGME49_277060
TGME49_280700				TGME49_225315				TGME49_277240
TGME49_262500				TGME49_226260				TGME49_277800
TGME49_222660				TGME49_224700				TGME49_277810
TGME49_249180				TGME49_321650				TGME49_277950
TGME49_225540				TGME49_320030				TGME49_277980
TGME49_249020				TGME49_271000				TGME49_278120
TGME49_267450				TGME49_266970				TGME49_278518
TGME49_201220				TGME49_226220				TGME49_278522
TGME49_243465				TGME49_315495				TGME49_278580
TGME49_219320				TGME49_299060				TGME49_278690
TGME49_241155				TGME49_200295				TGME49_278710
TGME49_273200				TGME49_272640				TGME49_278790
TGME49_229020				TGME49_234250				TGME49_278860
TGME49_203560				TGME49_308860				TGME49_278910
TGME49_270800				TGME49_312930				TGME49_278930
TGME49_291880				TGME49_214080				TGME49_279460
TGME49_269330				TGME49_203300				TGME49_280420
TGME49_232120				TGME49_311470				TGME49_280430
TGME49_261850				TGME49_214510				TGME49_280435
TGME49_206710				TGME49_285650				TGME49_280500
TGME49_203010				TGME49_278130				TGME49_280605
TGME49_225940				TGME49_270240				TGME49_280725
TGME49_225860				TGME49_237195				TGME49_281470
TGME49_246485				TGME49_230210				TGME49_281555
TGME49_247690				TGME49_311800				TGME49_281560
TGME49_319540				TGME49_213040				TGME49_281660
TGME49_220525				TGME49_241165				TGME49_281675
TGME49_210820				TGME49_241000				TGME49_282030
TGME49_238420				TGME49_217360				TGME49_282200
TGME49_217870				TGME49_202200				TGME49_282230
TGME49_262490				TGME49_313380				TGME49_283480
TGME49_226260				TGME49_264980				TGME49_283500
TGME49_311640				TGME49_257430				TGME49_283530
TGME49_240090				TGME49_310450				TGME49_283765
TGME49_225020				TGME49_222350				TGME49_283840
TGME49_329800				TGME49_262950				TGME49_283855
TGME49_249570				TGME49_277720				TGME49_284550
TGME49_268790				TGME49_315410				TGME49_284602
TGME49_222100				TGME49_221620				TGME49_284610
TGME49_236790				TGME49_272370				TGME49_284670
TGME49_230820				TGME49_309930				TGME49_285350
TGME49_215450				TGME49_293440				TGME49_285400
TGME49_246930				TGME49_280770				TGME49_285410
TGME49_243920				TGME49_261750				TGME49_285445
TGME49_271090				TGME49_206695				TGME49_285470
TGME49_289490				TGME49_258780				TGME49_285690
TGME49_273320				TGME49_220930				TGME49_285860
TGME49_277950				TGME49_209410				TGME49_285940
TGME49_311730				TGME49_209200				TGME49_286000
TGME49_300240				TGME49_253580				TGME49_286020
TGME49_285250				TGME49_275970				TGME49_286060
TGME49_275440				TGME49_316670				TGME49_286110
TGME49_203200				TGME49_279440				TGME49_286250
TGME49_235340				TGME49_258700				TGME49_286660
TGME49_300220				TGME49_263520				TGME49_286720
TGME49_297870				TGME49_239830				TGME49_287235
TGME49_264430				TGME49_218270				TGME49_288960
TGME49_320180				TGME49_272540				TGME49_289020
TGME49_225820				TGME49_225330				TGME49_289023
TGME49_248240				TGME49_250840				TGME49_289027
TGME49_278850				TGME49_315220				TGME49_289040
TGME49_232030				TGME49_280680				TGME49_289170
TGME49_253600				TGME49_230480				TGME49_289216
TGME49_224150				TGME49_200375				TGME49_289240
TGME49_234340				TGME49_262110				TGME49_289280
TGME49_270170				TGME49_250220				TGME49_289840
TGME49_262920				TGME49_211000				TGME49_289870
TGME49_236960				TGME49_234540				TGME49_289930
TGME49_310005				TGME49_254290				TGME49_290585
TGME49_210345				TGME49_262630				TGME49_290590
TGME49_233130				TGME49_269910				TGME49_290923
TGME49_281960				TGME49_283790				TGME49_290925
TGME49_225320				TGME49_263130				TGME49_291130
TGME49_293730				TGME49_231070				TGME49_291150
TGME49_239795				TGME49_211260				TGME49_291160
TGME49_254870				TGME49_273560				TGME49_291340
TGME49_226860				TGME49_315490				TGME49_292335
TGME49_271935				TGME49_280480				TGME49_292935
TGME49_246190				TGME49_312270				TGME49_293010
TGME49_270190				TGME49_205530				TGME49_293030
TGME49_268760				TGME49_313475				TGME49_293250
TGME49_270260				TGME49_201130				TGME49_293252
TGME49_246700				TGME49_312580				TGME49_293258
TGME49_213800				TGME49_244500				TGME49_293290
TGME49_309885				TGME49_257550				TGME49_293368
TGME49_253690				TGME49_209040				TGME49_293450
TGME49_315780				TGME49_214420				TGME49_293500
TGME49_226740				TGME49_212770				TGME49_293800
TGME49_249702				TGME49_310620				TGME49_293850
TGME49_280460				TGME49_252200				TGME49_293890
TGME49_306895				TGME49_220025				TGME49_294210
TGME49_226040				TGME49_269885				TGME49_294260
TGME49_286540				TGME49_243420				TGME49_294320
TGME49_230850				TGME49_229260				TGME49_294410
TGME49_205680				TGME49_289720				TGME49_294570
TGME49_271770				TGME49_258230				TGME49_294585
TGME49_226710				TGME49_258360				TGME49_294595
TGME49_293360				TGME49_215955				TGME49_294600
TGME49_300040				TGME49_287970				TGME49_294650
TGME49_252360				TGME49_267610				TGME49_294651
TGME49_231160				TGME49_318880				TGME49_294785
TGME49_286450				TGME49_252990				TGME49_294820
TGME49_248670				TGME49_287960				TGME49_294850
TGME49_272650				TGME49_319900				TGME49_295020
TGME49_211850				TGME49_297660				TGME49_295390
TGME49_243545				TGME49_225860				TGME49_295430
TGME49_267370				TGME49_249980				TGME49_295440
TGME49_277910				TGME49_297070				TGME49_295920
TGME49_254290				TGME49_286600				TGME49_297310
TGME49_272710				TGME49_228175				TGME49_297380
TGME49_261370				TGME49_221890				TGME49_297390
TGME49_318770				TGME49_265542				TGME49_297410
TGME49_218362				TGME49_278565				TGME49_297710
TGME49_270975				TGME49_246700				TGME49_297820
TGME49_272640				TGME49_267620				TGME49_297920
TGME49_306490				TGME49_258670				TGME49_298080
TGME49_313760				TGME49_224000				TGME49_298090
TGME49_315580				TGME49_268880				TGME49_298820
TGME49_243930				TGME49_209985				TGME49_299020
TGME49_212980				TGME49_249365				TGME49_299150
TGME49_308840				TGME49_221990				TGME49_299220
TGME49_319860				TGME49_286595				TGME49_299230
TGME49_237190				TGME49_220460				TGME49_300070
TGME49_273310				TGME49_255450				TGME49_300780
TGME49_245640				TGME49_265080				TGME49_301170
TGME49_269730				TGME49_236060				TGME49_301190
TGME49_277270				TGME49_306455				TGME49_301240
TGME49_239300				TGME49_271090				TGME49_301360
TGME49_270350				TGME49_204325				TGME49_301370
TGME49_249300				TGME49_300100				TGME49_301690
TGME49_319350				TGME49_305270				TGME49_302007
TGME49_216460				TGME49_205370				TGME49_304480
TGME49_225340				TGME49_293520				TGME49_304730
TGME49_254630				TGME49_265420				TGME49_305100
TGME49_211000				TGME49_219070				TGME49_305150
TGME49_246720				TGME49_294610				TGME49_305570
TGME49_225315				TGME49_232170				TGME49_305610
TGME49_203790				TGME49_300090				TGME49_305790
TGME49_266320				TGME49_237820				TGME49_306035
TGME49_231000				TGME49_206690				TGME49_306070
TGME49_257470				TGME49_280670				TGME49_306230
TGME49_253940				TGME49_235370				TGME49_306240
TGME49_294640				TGME49_289150				TGME49_306342
TGME49_232410				TGME49_230350				TGME49_306480
TGME49_222330				TGME49_286250				TGME49_306510
TGME49_243430				TGME49_239855				TGME49_306570
TGME49_293430				TGME49_318470				TGME49_306580
TGME49_278780				TGME49_224540				TGME49_306680
TGME49_203175				TGME49_265065				TGME49_306730
TGME49_246710				TGME49_206440				TGME49_306870
TGME49_273860				TGME49_310220				TGME49_306890
TGME49_249725				TGME49_266630				TGME49_307030
TGME49_261990				TGME49_225690				TGME49_307045
TGME49_261440				TGME49_297870				TGME49_307460
TGME49_272290				TGME49_283800				TGME49_307480
TGME49_316400				TGME49_230970				TGME49_307590
TGME49_202390				TGME49_299260				TGME49_307600
TGME49_239560				TGME49_271115				TGME49_307603
TGME49_289590				TGME49_202390				TGME49_307620
TGME49_260540				TGME49_218740				TGME49_307790
TGME49_201215				TGME49_260580				TGME49_307840
TGME49_316540				TGME49_234350				TGME49_308820
TGME49_241010				TGME49_221390				TGME49_308960
TGME49_249440				TGME49_320515				TGME49_309025
TGME49_209200				TGME49_288640				TGME49_309030
TGME49_265770				TGME49_309080				TGME49_309840
TGME49_236860				TGME49_223985				TGME49_309860
TGME49_215580				TGME49_248240				TGME49_310160
TGME49_310740				TGME49_214880				TGME49_310275
TGME49_278130				TGME49_225105				TGME49_310480
TGME49_264850				TGME49_306060				TGME49_310580
TGME49_258470				TGME49_244070				TGME49_310680
TGME49_286595				TGME49_315750				TGME49_310830
TGME49_220025				TGME49_267642				TGME49_311335
TGME49_244470				TGME49_217961				TGME49_311375
TGME49_243250				TGME49_239730				TGME49_311380
TGME49_231630				TGME49_230200				TGME49_311485
TGME49_278600				TGME49_275610				TGME49_311755
TGME49_245550				TGME49_244080				TGME49_311815
TGME49_314500				TGME49_314362				TGME49_311820
TGME49_202420				TGME49_261740				TGME49_311830
TGME49_220460				TGME49_216290				TGME49_312435
TGME49_265780				TGME49_318240				TGME49_312440
TGME49_223880				TGME49_206400				TGME49_312445
TGME49_253140				TGME49_268765				TGME49_312450
TGME49_322010				TGME49_301355				TGME49_312460
TGME49_221400				TGME49_272285				TGME49_312635
TGME49_220270				TGME49_266065				TGME49_312930
TGME49_315470				TGME49_308090				TGME49_312970
TGME49_246940				TGME49_309590				TGME49_312980
TGME49_243690				TGME49_310010				TGME49_313025
TGME49_217961				TGME49_227370				TGME49_313210
TGME49_204880				TGME49_308093				TGME49_313220
TGME49_218520				TGME49_224880				TGME49_313235
TGME49_209000				TGME49_217700				TGME49_313318
TGME49_213570				TGME49_289160				TGME49_313660
TGME49_244720				TGME49_258580				TGME49_313725
TGME49_216000				TGME49_264990				TGME49_313740
TGME49_315750				TGME49_233490				TGME49_313840
TGME49_309100				TGME49_225320				TGME49_313940
TGME49_282210				TGME49_286590				TGME49_314055
TGME49_231420				TGME49_293560				TGME49_314330
TGME49_310885				TGME49_244280				TGME49_314362
TGME49_294560				TGME49_293020				TGME49_314485
TGME49_288030				TGME49_260490				TGME49_314487
TGME49_277055				TGME49_285825				TGME49_314490
TGME49_268590				TGME49_243190				TGME49_314570
TGME49_278975				TGME49_208730				TGME49_314670
TGME49_240247				TGME49_214575				TGME49_315090
TGME49_305030				TGME49_289590				TGME49_315127
TGME49_220440				TGME49_313210				TGME49_315345
TGME49_255390				TGME49_242250				TGME49_315410
TGME49_240730				TGME49_294808				TGME49_315450
TGME49_233030				TGME49_308960				TGME49_315540
TGME49_222930				TGME49_208380				TGME49_315560
TGME49_289370				TGME49_212900				TGME49_315630
TGME49_205490				TGME49_322000				TGME49_315830
TGME49_219070				TGME49_297120				TGME49_315970
TGME49_315770				TGME49_291050				TGME49_316130
TGME49_314490				TGME49_268870				TGME49_316370
TGME49_314700				TGME49_300360				TGME49_316380
TGME49_244280				TGME49_315910				TGME49_316390
TGME49_265065				TGME49_295662				TGME49_316635
TGME49_249980				TGME49_253380				TGME49_318130
TGME49_252990				TGME49_301350				TGME49_318610
TGME49_267500				TGME49_253140				TGME49_318675
TGME49_289910				TGME49_310455				TGME49_319360
TGME49_297180				TGME49_226532				TGME49_319380
TGME49_224890				TGME49_218192				TGME49_319390
TGME49_250690				TGME49_293170				TGME49_319520
TGME49_229140				TGME49_226310				TGME49_319700
TGME49_201230				TGME49_215195				TGME49_319970
TGME49_229500				TGME49_308810				TGME49_319980
TGME49_224140				TGME49_238895				TGME49_319988
TGME49_310900				TGME49_314250				TGME49_320105
TGME49_312950				TGME49_256030				TGME49_320200
TGME49_208400				TGME49_267370				TGME49_320500
TGME49_215150				TGME49_285920				TGME49_320680
TGME49_306370				TGME49_222330				TGME49_320715
TGME49_267070				TGME49_234430				TGME49_322500
TGME49_230970				TGME49_209300				TGME49_325400
TGME49_218880				TGME49_239880				TGME49_200270
TGME49_235130				TGME49_229010				TGME49_200320
TGME49_263850				TGME49_215165				TGME49_200480
TGME49_285930				TGME49_205250				TGME49_201100
TGME49_217940				TGME49_270260				TGME49_201180
TGME49_205530				TGME49_238170				TGME49_202060
TGME49_210420				TGME49_203070				TGME49_202090
TGME49_247195				TGME49_205360				TGME49_202100
TGME49_253130				TGME49_310230				TGME49_202110
TGME49_202500				TGME49_208910				TGME49_203340
TGME49_222440				TGME49_291170				TGME49_203500
TGME49_264980				TGME49_314670				TGME49_203580
TGME49_238380				TGME49_255710				TGME49_203590
TGME49_321600				TGME49_238410				TGME49_204000
TGME49_269885				TGME49_308075				TGME49_204500
TGME49_253880				TGME49_213290				TGME49_204870
TGME49_245540				TGME49_243200				TGME49_206620
TGME49_211650				TGME49_212780				TGME49_206660
TGME49_314080				TGME49_248730				TGME49_207005
TGME49_263590				TGME49_291960				TGME49_207010
TGME49_205670				TGME49_311770				TGME49_207015
TGME49_258360				TGME49_225280				TGME49_207250
TGME49_227000				TGME49_260820				TGME49_207730
TGME49_205330				TGME49_258225				TGME49_207790
TGME49_262933				TGME49_273550				TGME49_207965
TGME49_217520				TGME49_207160				TGME49_208850
TGME49_312930				TGME49_291830				TGME49_209470
TGME49_313480				TGME49_206430				TGME49_209515
TGME49_315500				TGME49_247340				TGME49_210260
TGME49_256060				TGME49_295110				TGME49_210330
TGME49_299780				TGME49_254430				TGME49_210740
TGME49_232020				TGME49_221250				TGME49_211280
TGME49_227380				TGME49_313940				TGME49_212410
TGME49_294340				TGME49_232780				TGME49_212420
TGME49_211260				TGME49_252080				TGME49_212937
TGME49_234350				TGME49_203250				TGME49_213430
TGME49_285650				TGME49_315510				TGME49_214070
TGME49_233760				TGME49_227630				TGME49_214190
TGME49_225280				TGME49_211290				TGME49_214420
TGME49_225210				TGME49_268680				TGME49_216155
TGME49_305510				TGME49_252395				TGME49_217370
TGME49_266435				TGME49_218362				TGME49_217380
TGME49_319600				TGME49_309160				TGME49_217390
TGME49_232250				TGME49_295125				TGME49_217710
TGME49_311770				TGME49_319520				TGME49_217720
TGME49_322000				TGME49_310020				TGME49_219348
TGME49_201170				TGME49_244715				TGME49_219370
TGME49_261300				TGME49_268220				TGME49_219828
TGME49_253100				TGME49_204880				TGME49_221560
TGME49_237090				TGME49_253460				TGME49_222080
TGME49_221620				TGME49_266090				TGME49_222188
TGME49_247400				TGME49_265060				TGME49_223030
TGME49_218240				TGME49_297670				TGME49_223550
TGME49_215530				TGME49_262933				TGME49_223830
TGME49_212270				TGME49_203010				TGME49_224750
TGME49_224530				TGME49_270030				TGME49_224790
TGME49_308010				TGME49_258550				TGME49_224905
TGME49_312100				TGME49_253480				TGME49_226385
TGME49_295620				TGME49_234260				TGME49_228310
TGME49_282055				TGME49_203815				TGME49_228420
TGME49_256030				TGME49_236880				TGME49_229230
TGME49_311230				TGME49_207590				TGME49_229240
TGME49_266630				TGME49_327200				TGME49_229270
TGME49_239800				TGME49_218188				TGME49_229320
TGME49_244710				TGME49_242860				TGME49_230667
TGME49_278030				TGME49_219370				TGME49_231060
TGME49_319710				TGME49_203200				TGME49_231110
TGME49_206510				TGME49_208810				TGME49_231390
TGME49_260825				TGME49_207410				TGME49_231880
TGME49_262950				TGME49_203890				TGME49_232580
TGME49_218720				TGME49_239780				TGME49_233330
TGME49_271270				TGME49_310830				TGME49_233360
TGME49_312580				TGME49_239770				TGME49_233370
TGME49_216820				TGME49_261560				TGME49_234060
TGME49_248740				TGME49_299995				TGME49_234380
TGME49_203830				TGME49_231230				TGME49_234940
TGME49_227810				TGME49_310740				TGME49_235000
TGME49_201860				TGME49_256040				TGME49_235010
TGME49_203930				TGME49_316560				TGME49_235390
TGME49_244250				TGME49_320500				TGME49_236290
TGME49_315210				TGME49_201775				TGME49_236940
TGME49_223790				TGME49_209810				TGME49_236975
TGME49_229260				TGME49_280510				TGME49_237070
TGME49_288045				TGME49_234270				TGME49_237080
TGME49_262970				TGME49_236860				TGME49_237595
TGME49_268765				TGME49_204000				TGME49_237800
TGME49_260820				TGME49_210400				TGME49_237810
TGME49_237195				TGME49_225300				TGME49_238460
TGME49_237820				TGME49_211430				TGME49_238470
TGME49_240410				TGME49_313780				TGME49_238480
TGME49_238150				TGME49_305530				TGME49_238490
TGME49_236050				TGME49_295105				TGME49_238500
TGME49_251740				TGME49_253710				TGME49_238520
TGME49_272645				TGME49_219742				TGME49_238530
TGME49_252200				TGME49_254330				TGME49_238915
TGME49_271780				TGME49_238060				TGME49_239090
TGME49_268680				TGME49_267630				TGME49_241165
TGME49_237170				TGME49_218750				TGME49_243100
TGME49_289630				TGME49_313650				TGME49_243120
TGME49_297960				TGME49_285445				TGME49_243130
TGME49_318470				TGME49_232560				TGME49_243140
TGME49_231640				TGME49_275850				TGME49_243150
TGME49_286500				TGME49_293030				TGME49_243160
TGME49_244940				TGME49_277265				TGME49_243180
TGME49_305590				TGME49_201850				TGME49_243190
TGME49_255700				TGME49_218290				TGME49_243378
TGME49_244715				TGME49_204010				TGME49_243382
TGME49_248445				TGME49_205140				TGME49_243940
TGME49_227952				TGME49_313000				TGME49_244180
TGME49_282070				TGME49_294225				TGME49_244450
TGME49_218550				TGME49_244180				TGME49_244900
TGME49_311800				TGME49_202400				TGME49_245600
TGME49_310620				TGME49_243720				TGME49_246070
TGME49_206460				TGME49_299800				TGME49_246110
TGME49_236850				TGME49_320150				TGME49_247560
TGME49_228230				TGME49_253120				TGME49_247660
TGME49_255190				TGME49_312980				TGME49_248210
TGME49_217360				TGME49_304870				TGME49_248470
TGME49_276130				TGME49_213560				TGME49_249510
TGME49_315510				TGME49_283530				TGME49_250920
TGME49_270510				TGME49_311710				TGME49_251900
TGME49_239830				TGME49_285940				TGME49_251910
TGME49_246450				TGME49_205520				TGME49_252860
TGME49_310010				TGME49_264485				TGME49_254060
TGME49_258660				TGME49_297910				TGME49_254430
TGME49_201240				TGME49_278145				TGME49_254760
TGME49_277730				TGME49_278840				TGME49_254890
TGME49_296015				TGME49_267150				TGME49_255480
TGME49_285990				TGME49_218510				TGME49_256788
TGME49_229930				TGME49_252860				TGME49_257568
TGME49_261955				TGME49_258900				TGME49_257572
TGME49_220370				TGME49_319700				TGME49_258575
TGME49_312150				TGME49_249230				TGME49_258840
TGME49_235690				TGME49_297410				TGME49_259270
TGME49_261750				TGME49_219450				TGME49_259290
TGME49_250115				TGME49_238160				TGME49_259300
TGME49_295360				TGME49_260190				TGME49_259410
TGME49_273560				TGME49_285300				TGME49_259890
TGME49_316280				TGME49_267160				TGME49_261530
TGME49_247520				TGME49_258622				TGME49_263350
TGME49_299790				TGME49_205658				TGME49_264630
TGME49_308860				TGME49_270040				TGME49_265030
TGME49_234540				TGME49_253330				TGME49_265320
TGME49_261560				TGME49_219110				TGME49_266065
TGME49_200385				TGME49_211280				TGME49_266335
TGME49_279420				TGME49_272510				TGME49_266340
TGME49_314695				TGME49_295640				TGME49_266650
TGME49_260580				TGME49_216710				TGME49_266710
TGME49_241000				TGME49_232140				TGME49_267680
TGME49_272285				TGME49_257460				TGME49_268270
TGME49_291890				TGME49_294600				TGME49_268800
TGME49_289620				TGME49_233770				TGME49_268930
TGME49_208910				TGME49_266860				TGME49_269110
TGME49_215550				TGME49_212275				TGME49_269365
TGME49_277740				TGME49_229240				TGME49_270660
TGME49_221370				TGME49_220280				TGME49_271210
TGME49_287970				TGME49_239430				TGME49_271980
TGME49_258090				TGME49_235390				TGME49_273110
TGME49_237210				TGME49_232420				TGME49_273340
TGME49_265080				TGME49_259150				TGME49_273980
TGME49_308810				TGME49_268700				TGME49_274170
TGME49_221990				TGME49_270273				TGME49_275355
TGME49_266970				TGME49_224140				TGME49_275380
TGME49_213920				TGME49_205265				TGME49_275660
TGME49_230180				TGME49_288960				TGME49_276980
TGME49_311710				TGME49_215140				TGME49_277230
TGME49_204530				TGME49_235010				TGME49_277572
TGME49_242860				TGME49_318120				TGME49_278090
TGME49_224880				TGME49_275590				TGME49_278180
TGME49_315220				TGME49_243470				TGME49_278240
TGME49_249340				TGME49_251750				TGME49_278245
TGME49_238410				TGME49_311700				TGME49_278290
TGME49_224000				TGME49_258618				TGME49_278320
TGME49_257550				TGME49_288050				TGME49_278330
TGME49_246763				TGME49_203375				TGME49_278340
TGME49_230340				TGME49_225570				TGME49_278350
TGME49_283510				TGME49_310480				TGME49_278360
TGME49_271000				TGME49_231780				TGME49_278370
TGME49_293520				TGME49_233405				TGME49_278380
TGME49_264420				TGME49_219828				TGME49_278390
TGME49_310240				TGME49_280500				TGME49_278410
TGME49_268870				TGME49_235315				TGME49_278420
TGME49_291050				TGME49_254060				TGME49_278430
TGME49_316260				TGME49_259890				TGME49_279000
TGME49_247950				TGME49_209920				TGME49_279450
TGME49_294690				TGME49_220420				TGME49_280465
TGME49_300360				TGME49_271040				TGME49_280510
TGME49_223985				TGME49_280570				TGME49_281350
TGME49_312270				TGME49_247970				TGME49_281360
TGME49_305250				TGME49_292935				TGME49_281970
TGME49_202200				TGME49_286150				TGME49_283460
TGME49_316290				TGME49_309030				TGME49_283470
TGME49_266090				TGME49_265538				TGME49_283490
TGME49_220930				TGME49_222935				TGME49_283495
TGME49_246995				TGME49_259270				TGME49_283882
TGME49_231070				TGME49_288465				TGME49_286150
TGME49_283540				TGME49_210990				TGME49_286778
TGME49_220900				TGME49_297725				TGME49_286782
TGME49_230210				TGME49_315480				TGME49_287250
TGME49_240380				TGME49_305280				TGME49_291005
TGME49_234950				TGME49_267990				TGME49_291830
TGME49_255450				TGME49_268190				TGME49_291910
TGME49_221180				TGME49_262440				TGME49_292260
TGME49_263200				TGME49_205662				TGME49_294330
TGME49_234270				TGME49_234400				TGME49_295640
TGME49_289600				TGME49_309025				TGME49_295995
TGME49_265790				TGME49_237045				TGME49_296640
TGME49_310220				TGME49_262050				TGME49_297090
TGME49_313380				TGME49_258910				TGME49_297680
TGME49_286460				TGME49_295995				TGME49_298960
TGME49_218270				TGME49_240470				TGME49_300990
TGME49_316340				TGME49_229320				TGME49_301150
TGME49_262630				TGME49_247010				TGME49_301480
TGME49_237180				TGME49_258570				TGME49_305110
TGME49_321650				TGME49_239110				TGME49_305220
TGME49_294680				TGME49_265050				TGME49_306050
TGME49_267620				TGME49_209045				TGME49_306235
TGME49_319900				TGME49_203900				TGME49_307640
TGME49_309160				TGME49_231770				TGME49_309300
TGME49_277720				TGME49_293425				TGME49_309330
TGME49_203300				TGME49_246110				TGME49_309352
TGME49_244500				TGME49_208770				TGME49_311300
TGME49_254880				TGME49_203000				TGME49_311700
TGME49_216620				TGME49_293790				TGME49_312690
TGME49_264990				TGME49_225140				TGME49_315240
TGME49_214880				TGME49_242360				TGME49_315350
TGME49_269340				TGME49_224010				TGME49_315370
TGME49_240575				TGME49_221895				TGME49_315380
TGME49_226690				TGME49_234570				TGME49_316410
TGME49_224130				TGME49_253670				TGME49_316420
TGME49_200375				TGME49_267410				TGME49_316670
TGME49_242320				TGME49_253390				TGME49_316890
TGME49_286590				TGME49_221930				TGME49_318220
TGME49_285140				TGME49_318180				TGME49_319630
TGME49_310235				TGME49_285350				TGME49_320090
TGME49_310450				TGME49_278710				TGME49_320170
TGME49_305270				TGME49_319890				TGME49_320240
TGME49_203815								TGME49_320250
TGME49_294610								TGME49_320290
TGME49_209040								TGME49_320560
TGME49_240470								TGME49_320730
TGME49_201520								TGME49_320770
TGME49_311470								TGME49_321270
TGME49_224700								TGME49_321280
TGME49_308096								TGME49_321480
TGME49_297400								TGME49_321490
TGME49_258700								TGME49_329700
TGME49_300100								TGME49_329710
TGME49_254070
TGME49_234260
TGME49_265542
TGME49_253380
TGME49_238170
TGME49_313940
TGME49_230350
TGME49_225200
TGME49_309930
TGME49_223920
TGME49_263520
TGME49_236060
TGME49_235370
TGME49_205050
TGME49_212770
TGME49_253710
TGME49_250840
TGME49_297120
TGME49_244080
TGME49_208340
TGME49_300090
TGME49_239780
TGME49_271930
TGME49_217700
TGME49_225330
TGME49_213340
TGME49_203705
TGME49_320515
TGME49_310230
TGME49_250820
TGME49_226220
TGME49_313780
TGME49_320190
TGME49_299800
TGME49_295100
TGME49_224520
TGME49_211280
TGME49_309030
TGME49_265420
TGME49_247220
TGME49_295945
TGME49_313475
TGME49_265230
TGME49_289160
TGME49_280770
TGME49_267990
TGME49_297070
TGME49_244070
TGME49_315490
TGME49_224540
TGME49_291170
TGME49_243200
TGME49_206690
TGME49_267610
TGME49_275610
TGME49_216710
TGME49_206430
TGME49_269860
TGME49_257430
TGME49_320080
TGME49_280670
TGME49_263560
TGME49_208740
TGME49_270030
TGME49_275460
TGME49_239855
TGME49_315495
TGME49_306350
TGME49_209250
TGME49_231960
TGME49_228680
TGME49_231230
TGME49_289710
TGME49_219110
TGME49_241165
TGME49_315610
TGME49_212780
TGME49_205265
TGME49_225560
TGME49_232560
TGME49_309590
TGME49_295960
TGME49_244660
TGME49_219450
TGME49_236670
TGME49_282000
TGME49_262730
TGME49_306060
TGME49_289150
TGME49_230160
TGME49_308960
TGME49_203070
TGME49_206695
TGME49_293170
TGME49_221250
TGME49_270240
TGME49_215955
TGME49_258580
TGME49_308075
TGME49_205360
TGME49_239770
TGME49_208380
TGME49_308093
TGME49_228175
TGME49_286580
TGME49_227370
TGME49_316500
TGME49_249230
TGME49_297410
TGME49_308965
TGME49_297910
TGME49_243420
TGME49_295125
TGME49_285870
TGME49_289720
TGME49_291960
TGME49_295950
TGME49_207665
TGME49_310455
TGME49_277250
TGME49_308090
TGME49_270040
TGME49_285920
TGME49_262110
TGME49_250710
TGME49_248425
TGME49_211290
TGME49_292935
TGME49_261740
TGME49_295110
TGME49_293760
TGME49_205250
TGME49_253120
TGME49_266860
TGME49_234940
TGME49_252260
TGME49_297395
TGME49_207150
TGME49_212275
TGME49_229010
TGME49_293850
TGME49_224170
TGME49_203890
TGME49_252080
TGME49_278580
TGME49_285300
TGME49_206440
TGME49_320170
TGME49_244260
TGME49_277265
TGME49_268220
TGME49_243470
TGME49_212180
TGME49_201850
TGME49_209810
TGME49_207160
TGME49_295105
TGME49_315100
TGME49_209755
TGME49_315480
TGME49_220280
TGME49_218740
TGME49_319890
TGME49_258550
TGME49_232420
TGME49_310173
TGME49_260190
TGME49_219828
TGME49_235390
TGME49_272510
TGME49_259270
TGME49_280570
TGME49_205662
TGME49_257460
TGME49_316190
TGME49_296020
TGME49_294210
TGME49_293890
TGME49_253330
TGME49_228220
TGME49_286465
TGME49_275590
TGME49_289040
