# Supplementary material for: AP2XII-1 and AP2XI-2 Suppress Schizogony Gene Expression in Toxoplasma gondii
Source: Int J Mol Sci. 2024 May 18;25(10):5527. doi: 10.3390/ijms25105527 (PMC11122372; doi:10.3390/ijms25105527)
Supplement: Supplementary file 1 [file ijms-25-05527-s001.zip › Table S6.xlsx]

## Sheet: Sheet1
Table S6: The overlapped genes for Cut-Tag hits and RNA-seq DEGs of AP2XII-1 or AP2XI-2.
AP2XII-1	RNA-Seq		Cut-Tag			AP2XI-2	RNA-Seq		Cut-Tag
ID	log2FC（AP2XII-1/control）	pvalue	distance	peak(rep_1)	peak(rep_2)	ID	log2FC（AP2XII-1/control）	pvalue	distance	peak(rep_1)	peak(rep_2)
TGME49_257925	10.5376	1.24085e-17	Promoter (<=1kb)	827	82	TGME49_315380	8.52124	1.03784e-09	Promoter (<=1kb)	414	860
TGME49_259030	8.93019	1.10785e-06	Promoter (<=1kb)	199	856	TGME49_251962	7.76279	2.25396e-10	Promoter (<=1kb)	605	535
TGME49_249040	8.04286	3.70495e-12	Promoter (<=1kb)	993	766	TGME49_238470	7.58048	2.32406e-06	Promoter (<=1kb)	815	392
TGME49_243120	7.91819	3.95869e-06	Promoter (<=1kb)	332	319	TGME49_257925	7.30469	1.69311e-11	Promoter (<=1kb)	823	390
TGME49_231880	7.51343	1.33131e-10	Promoter (<=1kb)	950	1134	TGME49_240330	7.04761	5.7783e-08	Promoter (<=1kb)	943	865
TGME49_258840	7.26665	8.28486e-08	Promoter (<=1kb)	420	401	TGME49_238460	6.61331	3.27716e-07	Promoter (<=1kb)	889	775
TGME49_305110	7.16951	2.87954e-07	Promoter (<=1kb)	717	406	TGME49_259965	6.46299	5.36739e-11	Exon (TGME49_259965-t26_1/TGME49_259965 exon 10 of 12)	595	748
TGME49_251962	6.77932	1.80896e-10	Promoter (<=1kb)	635	769	TGME49_275380	6.21014	4.81488e-07	Promoter (<=1kb)	928	990
TGME49_312690	6.58524	4.60636e-51	Promoter (<=1kb)	201	149	TGME49_278380	5.00243	4.75266e-39	Promoter (<=1kb)	141	161
TGME49_207965	6.15897	2.20238e-13	Promoter (<=1kb)	782	270	TGME49_266600	4.33894	1.30692e-12	Promoter (<=1kb)	1447	1112
TGME49_316690	6.15738	1.01066e-85	Promoter (<=1kb)	1689	1651	TGME49_223258	4.12173	3.21726e-21	Promoter (<=1kb)	564	559
TGME49_207050	6.15676	1.14263e-35	Promoter (<=1kb)	749	727	TGME49_238490	4.06744	2.98165e-35	Promoter (<=1kb)	1011	1175
TGME49_200480	5.96479	0.00132703	Promoter (<=1kb)	507	499	TGME49_277060	3.9649	1.48563e-32	Promoter (<=1kb)	1952	1685
TGME49_278430	5.9601	4.73348e-37	Promoter (<=1kb)	326	137	TGME49_301150	3.82145	4.12431e-122	Promoter (<=1kb)	544	373
TGME49_237800	5.57035	3.88815e-71	Promoter (<=1kb)	1056	160	TGME49_278390	3.8191	8.05389e-35	Promoter (1-2kb)	110	346
TGME49_316580	5.5443	1.91833e-13	Promoter (<=1kb)	776	238	TGME49_316580	3.8162	6.59988e-08	Promoter (<=1kb)	1282	868
TGME49_219660	5.40593	3.07115e-59	Promoter (<=1kb)	848	1087	TGME49_305110	3.74892	0.00363259	Promoter (<=1kb)	953	936
TGME49_204000	4.96186	6.91948e-17	Promoter (<=1kb)	442	443	TGME49_213460	3.69908	3.72058e-184	Distal Intergenic	1008	599
TGME49_275790	4.90949	3.32004e-15	Promoter (<=1kb)	301	255	TGME49_238440	3.64832	6.37356e-14	Promoter (<=1kb)	689	803
TGME49_203800	4.89017	4.75755e-49	Promoter (1-2kb)	461	416	TGME49_320230	3.64016	1.76498e-110	Promoter (<=1kb)	733	204
TGME49_320250	4.79003	2.14325e-11	Promoter (<=1kb)	587	532	TGME49_316130	3.46244	7.39616e-17	Promoter (<=1kb)	482	177
TGME49_245980	4.55664	0	Promoter (<=1kb)	972	948	TGME49_205210	3.45707	5.45803e-130	Promoter (<=1kb)	1092	1944
TGME49_246070	4.52839	2.65831e-76	Promoter (<=1kb)	236	250	TGME49_237800	3.40963	1.34537e-26	Distal Intergenic	241	144
TGME49_206650	4.47437	1.73937e-88	Promoter (<=1kb)	1470	1049	TGME49_319360	3.3941	8.50607e-180	Promoter (<=1kb)	658	609
TGME49_306480	4.42198	3.44374e-64	3' UTR	1140	265	TGME49_294240	3.36052	6.10569e-20	Promoter (<=1kb)	78	161
TGME49_294820	4.04631	2.42212e-67	Promoter (1-2kb)	1348	210	TGME49_233180	3.33532	6.41311e-24	Promoter (<=1kb)	1047	149
TGME49_224760	3.9306	4.72707e-20	Promoter (<=1kb)	761	345	TGME49_320250	3.1239	1.25371e-05	Promoter (<=1kb)	653	1044
TGME49_278380	3.85958	2.72739e-42	Promoter (<=1kb)	318	196	TGME49_255460	3.10906	9.36248e-22	Promoter (<=1kb)	652	775
TGME49_226450	3.72638	5.67068e-31	Promoter (<=1kb)	827	386	TGME49_267460	2.93482	4.30305e-43	Promoter (<=1kb)	702	614
TGME49_320230	3.69812	4.0395e-99	Promoter (<=1kb)	183	232	TGME49_223060	2.90856	1.4016e-182	Promoter (<=1kb)	269	175
TGME49_275850	3.67872	6.53658e-97	Promoter (<=1kb)	449	493	TGME49_278090	2.80585	1.59351e-30	Promoter (<=1kb)	180	29
TGME49_316130	3.61128	1.58413e-17	Promoter (<=1kb)	1354	186	TGME49_305790	2.7956	3.48442e-61	Promoter (<=1kb)	166	632
TGME49_273980	3.61066	3.32693e-272	Promoter (1-2kb)	141	236	TGME49_218350	2.75715	0.0001253	Promoter (<=1kb)	530	307
TGME49_282200	3.59456	2.49665e-30	Promoter (<=1kb)	1848	469	TGME49_243940	2.71758	1.50422e-57	Promoter (<=1kb)	2730	2520
TGME49_238440	3.55047	1.78525e-12	Promoter (<=1kb)	291	6	TGME49_267670	2.58932	4.02597e-152	Promoter (<=1kb)	1046	990
TGME49_217420	3.54201	1.38014e-34	Promoter (<=1kb)	652	240	TGME49_282200	2.49567	2.77631e-17	Promoter (<=1kb)	1147	1516
TGME49_257670	3.5218	4.53042e-54	Promoter (<=1kb)	424	702	TGME49_227430	2.4288	3.4151e-209	Promoter (<=1kb)	805	523
TGME49_291910	3.46366	2.90967e-15	Promoter (<=1kb)	361	509	TGME49_241710	2.3382	2.90674e-113	Promoter (<=1kb)	1142	1458
TGME49_276920	3.40605	1.72397e-274	Promoter (<=1kb)	1476	1180	TGME49_269310	2.3172	1.61662e-33	Promoter (<=1kb)	486	616
TGME49_281660	3.393	3.43243e-08	Promoter (<=1kb)	748	310	TGME49_253780	2.27448	9.85501e-144	Promoter (<=1kb)	1314	1808
TGME49_277060	3.29775	5.66264e-23	Promoter (<=1kb)	1455	368	TGME49_240880	2.23698	1.20416e-104	Promoter (<=1kb)	765	676
TGME49_238490	3.28539	9.90867e-25	Promoter (<=1kb)	309	136	TGME49_224230	2.12739	4.49517e-114	Promoter (<=1kb)	1800	1762
TGME49_268800	3.25682	1.97707e-17	Promoter (<=1kb)	246	895	TGME49_281440	2.12734	3.46723e-128	Distal Intergenic	1288	1288
TGME49_311485	3.24608	1.81033e-09	Promoter (<=1kb)	83	216	TGME49_278400	2.11588	4.78233e-35	Promoter (<=1kb)	187	178
TGME49_244450	3.15127	4.46363e-179	Promoter (<=1kb)	7	0	TGME49_222080	2.10569	2.88711e-06	Promoter (<=1kb)	602	352
TGME49_319360	3.05109	2.92105e-145	Promoter (<=1kb)	829	342	TGME49_286020	2.08502	1.45533e-30	Promoter (1-2kb)	755	603
TGME49_204300	3.0058	0.000816121	Promoter (<=1kb)	768	321	TGME49_216200	2.06254	3.45939e-16	Promoter (<=1kb)	1195	955
TGME49_269300	2.97629	2.15294e-31	Promoter (<=1kb)	1002	151	TGME49_313840	1.97329	0.000629777	Promoter (<=1kb)	35	370
TGME49_224750	2.88651	7.23975e-10	Promoter (<=1kb)	468	253	TGME49_273980	1.95358	1.02248e-77	Promoter (<=1kb)	1137	1020
TGME49_266600	2.85712	4.26222e-07	Promoter (<=1kb)	552	78	TGME49_254890	1.92749	3.27771e-42	Promoter (<=1kb)	1035	825
TGME49_202580	2.85537	2.72021e-266	Promoter (<=1kb)	787	120	TGME49_232400	1.8631	2.00179e-41	Promoter (1-2kb)	341	268
TGME49_202010	2.85214	2.05137e-155	Promoter (<=1kb)	412	289	TGME49_206650	1.84351	2.92622e-16	Promoter (<=1kb)	1350	1098
TGME49_270680	2.78895	7.62058e-18	Promoter (<=1kb)	753	567	TGME49_286000	1.83735	9.14255e-57	Promoter (<=1kb)	223	356
TGME49_235315	2.76181	0.000111831	Promoter (<=1kb)	390	342	TGME49_310520	1.83685	8.64562e-98	Promoter (<=1kb)	809	511
TGME49_256800	2.76159	2.7475e-18	Promoter (<=1kb)	929	1233	TGME49_264225	1.7855	9.7337e-13	Promoter (<=1kb)	504	348
TGME49_306500	2.65755	3.9645e-21	Promoter (<=1kb)	0	6	TGME49_201180	1.69841	8.15363e-92	Promoter (<=1kb)	985	1356
TGME49_292260	2.53127	1.86337e-21	Promoter (<=1kb)	570	297	TGME49_274170	1.6666	2.64221e-06	Promoter (<=1kb)	620	383
TGME49_216200	2.46078	3.21878e-23	Promoter (<=1kb)	1398	1685	TGME49_275355	1.58913	3.41495e-06	Promoter (<=1kb)	175	284
TGME49_204290	2.45928	7.09953e-06	Promoter (<=1kb)	792	651	TGME49_318675	1.58512	3.42486e-17	Promoter (<=1kb)	616	282
TGME49_208020	2.42927	1.96456e-157	Promoter (1-2kb)	1132	371	TGME49_319630	1.58423	1.09274e-09	Promoter (1-2kb)	153	194
TGME49_286000	2.42361	3.14938e-96	Promoter (<=1kb)	486	121	TGME49_202930	1.58374	1.40532e-21	Promoter (<=1kb)	1007	553
TGME49_318610	2.41397	9.26421e-107	Promoter (<=1kb)	2133	1460	TGME49_253755	1.58153	0.00132098	Promoter (<=1kb)	224	65
TGME49_295430	2.40789	5.14365e-66	Promoter (<=1kb)	1007	315	TGME49_253770	1.55529	1.32516e-09	Distal Intergenic	171	305
TGME49_223560	2.40594	2.52573e-59	Promoter (<=1kb)	602	544	TGME49_240500	1.55122	2.77403e-19	Promoter (<=1kb)	148	1
TGME49_269310	2.38455	3.28036e-35	Promoter (<=1kb)	793	530	TGME49_220080	1.54142	0.000501017	Promoter (<=1kb)	506	661
TGME49_314250	2.29082	5.74067e-55	Promoter (<=1kb)	2265	1599	TGME49_294410	1.52732	1.39574e-27	Promoter (<=1kb)	1159	485
TGME49_318675	2.27643	8.49054e-31	Promoter (<=1kb)	299	439	TGME49_316690	1.5215	1.52665e-07	Promoter (<=1kb)	1709	1242
TGME49_219742	2.25264	2.47583e-12	Promoter (<=1kb)	413	791	TGME49_291910	1.48242	0.000793005	Promoter (<=1kb)	483	587
TGME49_278090	2.23669	4.12987e-20	Promoter (<=1kb)	43	162	TGME49_270670	1.45761	6.36776e-22	Promoter (<=1kb)	1033	917
TGME49_229730	2.22987	7.58943e-05	Promoter (<=1kb)	792	1212	TGME49_307045	1.43265	5.83766e-07	Promoter (<=1kb)	556	753
TGME49_243190	2.12727	1.96439e-11	Promoter (<=1kb)	713	190	TGME49_313660	1.42883	1.16596e-34	Promoter (<=1kb)	212	343
TGME49_275355	2.11305	4.52314e-11	Promoter (<=1kb)	479	79	TGME49_312690	1.40849	0.000805105	Promoter (<=1kb)	153	1168
TGME49_248140	2.0934	4.42092e-64	Promoter (<=1kb)	95	289	TGME49_201820	1.35473	1.60963e-37	Promoter (<=1kb)	1040	1071
TGME49_307590	2.0635	8.19683e-09	3' UTR	80	368	TGME49_269320	1.34669	2.51377e-33	Promoter (<=1kb)	626	284
TGME49_250220	2.01732	4.74915e-57	Promoter (<=1kb)	627	233	TGME49_220330	1.32004	7.62464e-27	Promoter (<=1kb)	188	455
TGME49_224845	1.94798	1.42654e-21	Promoter (<=1kb)	699	592	TGME49_239270	1.31964	2.26228e-50	Promoter (<=1kb)	888	1269
TGME49_281400	1.9222	5.84179e-250	Exon (TGME49_281400-t26_1/TGME49_281400 exon 14 of 21)	1647	334	TGME49_206680	1.23805	6.78073e-19	Promoter (<=1kb)	177	229
TGME49_278400	1.87147	3.36213e-28	Promoter (<=1kb)	46	139	TGME49_219660	1.23634	0.000235365	Promoter (<=1kb)	1091	857
TGME49_213460	1.81552	1.85137e-53	Distal Intergenic	284	90	TGME49_223560	1.23613	9.80768e-17	Promoter (<=1kb)	422	1264
TGME49_320680	1.75968	7.37309e-55	Promoter (<=1kb)	1235	733	TGME49_295430	1.20231	1.9398e-21	Promoter (<=1kb)	920	581
TGME49_311380	1.67515	1.95127e-45	Promoter (<=1kb)	253	362	TGME49_300990	1.1956	1.306e-29	Promoter (<=1kb)	864	685
TGME49_263220	1.60742	6.12454e-62	Promoter (<=1kb)	805	805	TGME49_311390	1.18089	1.5173e-13	Promoter (<=1kb)	473	368
TGME49_206660	1.59528	1.63625e-05	Promoter (<=1kb)	29	45	TGME49_239475	1.17749	1.60538e-05	Exon (TGME49_239475-t26_1/TGME49_239475 exon 1 of 16)	74	267
TGME49_214430	1.57764	1.93467e-85	Promoter (<=1kb)	1365	1193	TGME49_273640	1.17217	7.61959e-35	Promoter (<=1kb)	577	486
TGME49_311390	1.57603	1.32108e-23	Promoter (<=1kb)	7	148	TGME49_306480	1.15176	7.1487e-06	3' UTR	2141	1076
TGME49_240880	1.54034	2.2155e-54	Promoter (<=1kb)	3086	2987	TGME49_263820	1.14348	3.70086e-64	Promoter (<=1kb)	734	537
TGME49_227430	1.53364	3.59385e-92	Promoter (<=1kb)	760	671	TGME49_200240	1.1252	0.00184208	Promoter (<=1kb)	139	135
TGME49_304930	1.51208	6.59637e-17	Promoter (1-2kb)	178	70	TGME49_267480	1.12087	2.14848e-31	Promoter (<=1kb)	622	529
TGME49_272440	1.49569	4.42439e-11	Promoter (1-2kb)	73	87	TGME49_278245	1.11552	0.00010476	Promoter (<=1kb)	420	673
TGME49_264260	1.45997	6.54667e-05	Distal Intergenic	180	163	TGME49_294820	1.09435	0.000108062	Promoter (1-2kb)	277	175
TGME49_201180	1.45653	7.41541e-69	Promoter (<=1kb)	1184	880	TGME49_203830	1.08383	1.37518e-18	Promoter (<=1kb)	386	257
TGME49_267460	1.4088	5.4343e-11	Promoter (<=1kb)	487	213	TGME49_284310	1.06462	1.42808e-16	Distal Intergenic	339	141
TGME49_267980	1.3792	4.71965e-36	Promoter (<=1kb)	1181	953	TGME49_215895	1.05489	1.84259e-94	Promoter (<=1kb)	1830	2226
TGME49_205210	1.3399	3.09597e-22	Promoter (<=1kb)	834	1154	TGME49_309865	1.04466	0.00267409	Promoter (<=1kb)	241	222
TGME49_306510	1.33817	1.21844e-76	Promoter (<=1kb)	1245	158	TGME49_251660	1.03658	3.46891e-18	Promoter (<=1kb)	206	183
TGME49_249510	1.33805	9.77656e-31	Promoter (<=1kb)	593	452	TGME49_309990	1.02835	1.25717e-14	Promoter (<=1kb)	871	1215
TGME49_278390	1.336	5.36466e-07	Promoter (<=1kb)	147	273	TGME49_276990	1.00012	2.45108e-17	Promoter (<=1kb)	614	290
TGME49_320090	1.33155	1.27111e-28	Promoter (<=1kb)	2066	738	TGME49_236850	-1.00475	5.47578e-29	Promoter (<=1kb)	305	438
TGME49_301150	1.32505	1.77118e-16	Promoter (<=1kb)	234	189	TGME49_282070	-1.00704	4.1271e-44	Promoter (1-2kb)	126	151
TGME49_224230	1.31924	1.043e-42	Promoter (<=1kb)	1229	1105	TGME49_269425	-1.01774	5.5727e-16	Distal Intergenic	183	299
TGME49_318220	1.29773	0.00221697	Promoter (<=1kb)	334	4	TGME49_250820	-1.02329	9.41795e-75	Promoter (<=1kb)	284	786
TGME49_214420	1.29022	8.28753e-17	Promoter (<=1kb)	508	400	TGME49_215775	-1.03418	6.3038e-45	Promoter (<=1kb)	653	461
TGME49_280465	1.26911	0.00047444	Promoter (<=1kb)	1512	1651	TGME49_293760	-1.03434	1.20898e-63	Promoter (<=1kb)	407	393
TGME49_241710	1.25707	1.25976e-34	Promoter (<=1kb)	1239	1328	TGME49_231160	-1.05226	1.93776e-48	Promoter (<=1kb)	65	277
TGME49_254890	1.22073	3.49816e-18	Promoter (<=1kb)	439	335	TGME49_200385	-1.0616	3.18325e-23	Distal Intergenic	222	622
TGME49_286610	1.17607	9.18482e-17	Promoter (<=1kb)	0	276	TGME49_252210	-1.06409	1.65767e-36	Promoter (<=1kb)	516	494
TGME49_255370	1.1634	2.20138e-18	Promoter (<=1kb)	109	316	TGME49_215530	-1.06944	4.32384e-23	Promoter (<=1kb)	166	1
TGME49_263830	1.15964	5.73684e-06	Promoter (<=1kb)	696	865	TGME49_255700	-1.08016	2.76348e-40	Promoter (1-2kb)	140	236
TGME49_245770	1.1541	3.01682e-22	Promoter (<=1kb)	463	156	TGME49_251740	-1.0847	1.61347e-40	Promoter (<=1kb)	609	588
TGME49_239020	1.14181	1.83057e-50	Promoter (<=1kb)	807	235	TGME49_214070	-1.11778	7.00324e-17	Promoter (<=1kb)	795	581
TGME49_250360	1.14023	2.8099e-20	Promoter (<=1kb)	317	343	TGME49_308010	-1.12053	1.56848e-80	Promoter (<=1kb)	451	195
TGME49_300990	1.09324	9.0736e-24	Promoter (<=1kb)	1525	1002	TGME49_220900	-1.12303	1.25625e-126	Promoter (<=1kb)	329	162
TGME49_257560	1.08837	1.15638e-36	Promoter (<=1kb)	239	282	TGME49_315770	-1.1245	3.62484e-76	Distal Intergenic	298	212
TGME49_267670	1.07494	9.87096e-29	Promoter (<=1kb)	1234	701	TGME49_218955	-1.14033	2.54482e-15	Promoter (<=1kb)	668	1147
TGME49_270700	1.07011	1.17414e-36	Promoter (<=1kb)	565	358	TGME49_267140	-1.14048	7.35162e-13	Promoter (<=1kb)	693	720
TGME49_250500	1.05555	2.11899e-11	Promoter (<=1kb)	427	358	TGME49_277250	-1.14057	0.000141909	Promoter (<=1kb)	233	99
TGME49_206680	1.04224	1.52329e-14	Promoter (<=1kb)	438	172	TGME49_289710	-1.14099	5.12157e-34	Promoter (<=1kb)	132	65
TGME49_310090	1.04147	0.000171317	Promoter (<=1kb)	539	691	TGME49_289910	-1.14594	1.10881e-41	Promoter (<=1kb)	189	1014
TGME49_266070	1.03166	5.69571e-09	Promoter (1-2kb)	361	15	TGME49_223920	-1.1558	3.16252e-71	Promoter (<=1kb)	54	195
TGME49_285800	1.0237	9.17139e-39	Promoter (<=1kb)	219	176	TGME49_308860	-1.19572	3.88155e-179	Promoter (<=1kb)	9	903
TGME49_232230	1.01094	3.52735e-13	Promoter (<=1kb)	209	79	TGME49_203300	-1.19856	1.47344e-88	Promoter (<=1kb)	376	347
TGME49_218955	-1.00064	2.49192e-12	Promoter (<=1kb)	1383	1254	TGME49_270240	-1.20244	1.33484e-87	Promoter (<=1kb)	239	231
TGME49_232130	-1.0026	6.72934e-97	Promoter (<=1kb)	396	821	TGME49_262950	-1.22822	5.65671e-82	Promoter (<=1kb)	209	213
TGME49_214970	-1.0102	2.23477e-71	Promoter (<=1kb)	398	164	TGME49_221620	-1.23356	2.4063e-41	Promoter (<=1kb)	365	231
TGME49_208030	-1.01209	1.45436e-34	Promoter (<=1kb)	1485	120	TGME49_293440	-1.23445	1.05183e-42	Promoter (<=1kb)	669	166
TGME49_258410	-1.01397	1.12509e-25	Promoter (<=1kb)	1081	525	TGME49_230480	-1.25444	3.11061e-56	Promoter (<=1kb)	815	756
TGME49_221630	-1.01629	1.11898e-34	Promoter (<=1kb)	183	383	TGME49_250220	-1.25836	8.30996e-24	Promoter (<=1kb)	985	320
TGME49_315190	-1.02416	3.83864e-27	Promoter (<=1kb)	232	189	TGME49_283790	-1.26475	3.28307e-25	Promoter (1-2kb)	981	292
TGME49_271970	-1.02504	2.10626e-62	Promoter (<=1kb)	594	623	TGME49_280480	-1.27657	2.62186e-37	Promoter (<=1kb)	216	216
TGME49_233380	-1.03087	1.44532e-105	Promoter (<=1kb)	1414	329	TGME49_209040	-1.28509	8.03175e-25	3' UTR	163	175
TGME49_219175	-1.03334	3.2785e-10	Promoter (<=1kb)	194	348	TGME49_214420	-1.29045	7.83729e-19	Promoter (<=1kb)	505	526
TGME49_249180	-1.03934	1.05361e-73	3' UTR	378	566	TGME49_212770	-1.29101	4.39588e-108	Promoter (<=1kb)	1228	433
TGME49_243465	-1.04215	1.41077e-32	Promoter (1-2kb)	1039	1264	TGME49_269885	-1.30295	1.33197e-52	Promoter (<=1kb)	361	99
TGME49_203560	-1.0467	2.66384e-26	Distal Intergenic	286	185	TGME49_229260	-1.3098	7.8245e-72	Promoter (<=1kb)	87	80
TGME49_269330	-1.04988	3.74395e-51	Promoter (<=1kb)	4	54	TGME49_205370	-1.38076	8.9602e-97	Promoter (<=1kb)	222	1025
TGME49_210820	-1.06559	5.58489e-43	Promoter (<=1kb)	326	268	TGME49_318470	-1.39952	9.40528e-57	Promoter (<=1kb)	538	480
TGME49_240090	-1.06891	1.68457e-89	Promoter (<=1kb)	112	222	TGME49_206440	-1.40157	9.14707e-06	Promoter (<=1kb)	462	400
TGME49_268790	-1.07179	8.05325e-42	Promoter (<=1kb)	323	195	TGME49_221390	-1.43622	7.67732e-71	Promoter (<=1kb)	1002	372
TGME49_275440	-1.08485	5.72386e-62	Promoter (<=1kb)	940	802	TGME49_261740	-1.47328	6.70513e-56	Promoter (<=1kb)	48	290
TGME49_297870	-1.08966	2.16196e-32	Promoter (1-2kb)	131	260	TGME49_308090	-1.49484	1.13552e-67	Promoter (<=1kb)	265	189
TGME49_270170	-1.099	2.97641e-29	Promoter (<=1kb)	487	217	TGME49_310010	-1.4979	5.4487e-147	Promoter (1-2kb)	97	397
TGME49_262920	-1.09912	2.18336e-85	Exon (TGME49_262920-t26_1/TGME49_262920 exon 4 of 11)	1	201	TGME49_224880	-1.50426	2.62544e-35	Promoter (1-2kb)	203	203
TGME49_270260	-1.11537	3.83333e-20	Promoter (<=1kb)	423	497	TGME49_217700	-1.50732	1.93859e-35	Promoter (<=1kb)	874	991
TGME49_253690	-1.11809	3.22051e-50	Promoter (<=1kb)	91	87	TGME49_258580	-1.51115	2.25128e-301	Promoter (<=1kb)	586	561
TGME49_280460	-1.12206	6.3668e-76	Promoter (<=1kb)	1028	633	TGME49_233490	-1.51342	2.35112e-131	Promoter (1-2kb)	174	301
TGME49_230850	-1.12549	1.92042e-41	Promoter (<=1kb)	243	373	TGME49_286590	-1.51926	1.94042e-154	Promoter (<=1kb)	1603	313
TGME49_205680	-1.12622	3.31054e-98	Promoter (<=1kb)	340	418	TGME49_243190	-1.53976	1.14917e-05	Promoter (<=1kb)	558	378
TGME49_293360	-1.12787	4.4665e-49	Promoter (<=1kb)	198	70	TGME49_208730	-1.54099	1.96425e-99	Promoter (<=1kb)	1106	1247
TGME49_286450	-1.13022	6.24418e-15	Promoter (<=1kb)	773	1296	TGME49_212900	-1.56358	7.47574e-128	Promoter (<=1kb)	386	387
TGME49_211850	-1.13273	1.18566e-39	Promoter (<=1kb)	6	72	TGME49_295662	-1.57677	7.71804e-06	Promoter (<=1kb)	599	597
TGME49_243545	-1.13361	9.36564e-29	Promoter (<=1kb)	670	1264	TGME49_253380	-1.57749	2.31693e-76	Promoter (<=1kb)	899	391
TGME49_267370	-1.13391	1.1005e-48	Promoter (<=1kb)	1043	253	TGME49_314250	-1.60071	8.21085e-20	Promoter (<=1kb)	505	1029
TGME49_272710	-1.13677	7.06225e-32	Promoter (1-2kb)	502	397	TGME49_267370	-1.61158	5.48181e-100	Promoter (<=1kb)	424	1021
TGME49_218362	-1.14175	5.4011e-29	Promoter (<=1kb)	1386	842	TGME49_270260	-1.65151	2.24813e-44	Promoter (<=1kb)	1483	981
TGME49_243930	-1.14864	6.88944e-90	Promoter (<=1kb)	1669	186	TGME49_212780	-1.7043	1.46548e-158	Promoter (<=1kb)	361	234
TGME49_269730	-1.15586	3.68879e-63	Promoter (<=1kb)	598	609	TGME49_315510	-1.78489	1.44985e-99	Promoter (<=1kb)	436	189
TGME49_216460	-1.15923	3.63573e-40	Promoter (<=1kb)	54	190	TGME49_218362	-1.8019	6.61847e-71	Promoter (<=1kb)	801	809
TGME49_246720	-1.16279	1.11143e-75	Promoter (<=1kb)	101	320	TGME49_253460	-1.84217	2.30023e-11	Promoter (<=1kb)	399	600
TGME49_203790	-1.16399	5.31068e-25	Promoter (1-2kb)	216	199	TGME49_253480	-1.8643	6.75389e-11	Promoter (<=1kb)	89	260
TGME49_232410	-1.16947	5.75396e-42	Promoter (<=1kb)	136	104	TGME49_203815	-1.87827	1.06824e-13	Promoter (1-2kb)	285	115
TGME49_261990	-1.17953	1.42631e-25	Promoter (<=1kb)	340	340	TGME49_239770	-1.93452	1.41387e-74	Promoter (<=1kb)	547	247
TGME49_261440	-1.18346	2.50833e-94	Promoter (<=1kb)	430	422	TGME49_204000	-2.02046	1.9787e-05	Promoter (<=1kb)	434	553
TGME49_316400	-1.18461	1.44499e-44	Promoter (<=1kb)	583	98	TGME49_219742	-2.04427	4.40909e-08	Promoter (<=1kb)	983	392
TGME49_260540	-1.18759	8.22617e-97	Promoter (<=1kb)	311	252	TGME49_232560	-2.06927	5.07982e-201	Promoter (<=1kb)	445	655
TGME49_249440	-1.18803	3.32988e-68	Promoter (<=1kb)	293	237	TGME49_244180	-2.18755	1.24403e-19	Promoter (<=1kb)	239	3
TGME49_215580	-1.19469	3.31666e-18	Promoter (<=1kb)	802	227	TGME49_267150	-2.38286	1.03097e-36	Promoter (<=1kb)	462	426
TGME49_258470	-1.19686	9.26475e-46	Promoter (<=1kb)	366	225	TGME49_267160	-2.53335	8.16181e-29	Promoter (<=1kb)	654	864
TGME49_231630	-1.20453	5.84128e-63	Promoter (<=1kb)	642	343	TGME49_239430	-2.68201	0.000141107	Promoter (<=1kb)	820	973
TGME49_220460	-1.21127	2.84665e-09	Promoter (<=1kb)	430	545	TGME49_311700	-3.01069	2.51473e-16	Promoter (<=1kb)	1123	1332
TGME49_223880	-1.21532	2.61315e-44	Promoter (1-2kb)	521	424	TGME49_220420	-3.38537	5.94928e-21	Promoter (<=1kb)	287	420
TGME49_220270	-1.21861	6.0509e-96	Promoter (<=1kb)	563	262	TGME49_271040	-3.41262	0.000246421	Promoter (<=1kb)	204	2600
TGME49_213570	-1.22878	9.94054e-73	Promoter (<=1kb)	373	89	TGME49_288465	-3.55857	0.00331027	Exon (TGME49_288475-t26_1/TGME49_288475 exon 1 of 2)	24	234
TGME49_282210	-1.23318	2.18698e-61	Promoter (<=1kb)	1132	1047
TGME49_310885	-1.23547	3.40008e-32	Promoter (<=1kb)	46	3
TGME49_233030	-1.25037	1.31373e-38	Promoter (1-2kb)	238	173
TGME49_289370	-1.25076	1.21924e-25	Promoter (<=1kb)	1027	316
TGME49_219070	-1.25221	4.92056e-62	Distal Intergenic	446	575
TGME49_314700	-1.25589	1.8994e-75	Promoter (<=1kb)	1560	1861
TGME49_289910	-1.26119	2.43137e-49	Promoter (<=1kb)	204	1224
TGME49_201230	-1.2671	2.8487e-63	Promoter (<=1kb)	312	177
TGME49_310900	-1.26877	6.33246e-67	Promoter (1-2kb)	936	647
TGME49_215150	-1.27127	5.77202e-77	Promoter (<=1kb)	1222	815
TGME49_269885	-1.28184	1.01347e-50	Promoter (<=1kb)	641	393
TGME49_253880	-1.28256	1.18558e-46	Promoter (<=1kb)	1835	279
TGME49_263590	-1.28526	1.96e-20	Promoter (<=1kb)	1159	29
TGME49_205670	-1.28746	1.46051e-71	Promoter (<=1kb)	67	164
TGME49_217520	-1.29111	8.67451e-54	3' UTR	115	166
TGME49_315500	-1.29396	9.5556e-50	Promoter (<=1kb)	229	402
TGME49_261300	-1.31251	6.95207e-14	Promoter (<=1kb)	269	67
TGME49_237090	-1.31729	1.05391e-59	Promoter (<=1kb)	283	1036
TGME49_221620	-1.31852	8.65485e-47	Promoter (<=1kb)	585	121
TGME49_218240	-1.31957	1.51133e-96	Promoter (<=1kb)	153	205
TGME49_212270	-1.32558	1.7048e-64	Promoter (<=1kb)	247	221
TGME49_308010	-1.3275	1.45111e-102	Promoter (<=1kb)	324	433
TGME49_206510	-1.3428	4.60861e-101	Promoter (<=1kb)	456	563
TGME49_248740	-1.35316	6.88736e-15	Promoter (<=1kb)	641	29
TGME49_203830	-1.35535	5.06645e-27	Promoter (<=1kb)	208	179
TGME49_223790	-1.36396	1.6792e-119	Promoter (<=1kb)	35	195
TGME49_229260	-1.36417	6.23717e-76	Promoter (<=1kb)	253	354
TGME49_251740	-1.37342	2.34784e-63	Promoter (<=1kb)	846	208
TGME49_318470	-1.37899	1.24162e-54	Promoter (<=1kb)	541	361
TGME49_286500	-1.38588	3.25922e-29	Promoter (<=1kb)	189	41
TGME49_255700	-1.38966	1.94781e-63	Promoter (1-2kb)	60	71
TGME49_218550	-1.40254	1.42158e-123	Promoter (<=1kb)	905	869
TGME49_228230	-1.4044	2.48725e-149	Promoter (<=1kb)	884	539
TGME49_315510	-1.40785	1.6576e-60	Promoter (<=1kb)	329	502
TGME49_270510	-1.40867	2.316e-73	Promoter (<=1kb)	847	510
TGME49_239830	-1.41007	2.32132e-71	Promoter (<=1kb)	227	378
TGME49_310010	-1.41541	1.21554e-126	Promoter (<=1kb)	360	222
TGME49_277730	-1.4162	2.37698e-26	Promoter (<=1kb)	1719	149
TGME49_247520	-1.43401	1.21603e-104	Promoter (<=1kb)	218	320
TGME49_308860	-1.43579	1.40975e-243	Promoter (<=1kb)	473	261
TGME49_200385	-1.43722	1.34715e-40	Promoter (1-2kb)	1021	793
TGME49_291890	-1.44262	1.29035e-101	Promoter (<=1kb)	221	584
TGME49_204530	-1.45905	1.82886e-17	Promoter (<=1kb)	614	576
TGME49_224000	-1.46659	5.09057e-85	Promoter (<=1kb)	467	850
TGME49_257550	-1.46905	4.81999e-126	Promoter (<=1kb)	155	185
TGME49_293520	-1.47204	3.05343e-10	Exon (TGME49_293550-t26_1/TGME49_293550 exon 9 of 9)	404	447
TGME49_268870	-1.47676	3.06587e-93	Exon (TGME49_268870-t26_1/TGME49_268870 exon 3 of 10)	106	65
TGME49_266090	-1.4893	5.96352e-66	Promoter (<=1kb)	1140	846
TGME49_283540	-1.50128	1.24356e-103	Promoter (<=1kb)	206	402
TGME49_255450	-1.51473	1.4801e-200	Promoter (1-2kb)	7	196
TGME49_221180	-1.51519	3.44708e-201	Promoter (<=1kb)	984	1253
TGME49_319900	-1.53931	1.64305e-77	Promoter (<=1kb)	255	291
TGME49_203300	-1.55619	2.65978e-138	Promoter (<=1kb)	1028	424
TGME49_269340	-1.5703	6.11671e-154	Promoter (<=1kb)	224	237
TGME49_286590	-1.59345	8.16108e-161	Promoter (<=1kb)	1668	1242
TGME49_203815	-1.60359	1.34113e-05	Distal Intergenic	287	419
TGME49_294610	-1.60687	3.30935e-108	Promoter (<=1kb)	547	224
TGME49_253380	-1.63181	1.00758e-80	Promoter (<=1kb)	242	146
TGME49_225200	-1.64397	2.0632e-147	Promoter (<=1kb)	143	139
TGME49_212770	-1.6616	2.00211e-171	Promoter (<=1kb)	380	170
TGME49_271930	-1.68136	1.35539e-30	Promoter (<=1kb)	265	1057
TGME49_203705	-1.70269	1.72173e-08	Promoter (<=1kb)	2276	604
TGME49_313780	-1.72387	6.24334e-168	Promoter (<=1kb)	345	124
TGME49_295100	-1.73336	0	Promoter (<=1kb)	493	62
TGME49_247220	-1.74417	5.66477e-157	Promoter (<=1kb)	909	545
TGME49_295945	-1.7457	0.000284807	Exon (TGME49_295935-t26_1/TGME49_295935 exon 3 of 6)	814	336
TGME49_269860	-1.81917	0.00244444	Exon (TGME49_269885-t26_1/TGME49_269885 exon 10 of 12)	40	122
TGME49_257430	-1.82478	7.10895e-154	Promoter (<=1kb)	348	146
TGME49_315610	-1.8942	1.38525e-184	Promoter (<=1kb)	989	1108
TGME49_225560	-1.90583	2.00582e-228	Promoter (<=1kb)	184	378
TGME49_232560	-1.90908	1.30227e-165	Promoter (<=1kb)	307	433
TGME49_309590	-1.91299	4.57893e-160	Promoter (<=1kb)	381	266
TGME49_219450	-1.92074	1.25889e-07	Promoter (<=1kb)	81	232
TGME49_306060	-1.93942	4.67053e-90	Promoter (<=1kb)	885	58
TGME49_230160	-1.96026	1.43724e-46	Promoter (<=1kb)	12	406
TGME49_270240	-2.0029	8.44405e-236	Promoter (<=1kb)	1763	627
TGME49_215955	-2.01404	0.000494113	Promoter (1-2kb)	209	234
TGME49_228175	-2.04399	6.20298e-12	Promoter (<=1kb)	96	251
TGME49_277250	-2.19716	2.55098e-06	Promoter (<=1kb)	390	285
TGME49_308090	-2.20586	1.01265e-143	Promoter (<=1kb)	170	269
TGME49_293760	-2.29633	4.81845e-246	Promoter (<=1kb)	942	692
TGME49_212275	-2.40066	7.62007e-08	Promoter (1-2kb)	206	62
TGME49_206440	-2.53029	1.16287e-09	Promoter (<=1kb)	183	351
TGME49_259270	-4.26984	3.93999e-09	Promoter (<=1kb)	93	174
