# Supplementary material for: AP2XII-1 and AP2XI-2 Suppress Schizogony Gene Expression in Toxoplasma gondii
Source: Int J Mol Sci. 2024 May 18;25(10):5527. doi: 10.3390/ijms25105527 (PMC11122372; doi:10.3390/ijms25105527)
Supplement: Supplementary file 1 [file ijms-25-05527-s001.zip › Table S7.xlsx]

## Sheet: Sheet1
Table S7: SRS surface protein-related genes regulated by AP2XII-1 or AP2XI-2.
AP2XII-1-mAID							AP2XI-2-mAID
gene ID	Gene Name	log2FoldChange	pvalue	padj	EES stage		gene ID	Gene Name	log2FoldChange	pvalue	padj	EES stage
TGME49_251962	SRS59K	6.77932	1.80896e-10	8.25705e-10	EES		TGME49_296640	SRS48E	9.58824	4.67308e-58	2.12917e-56	EES
TGME49_315370	SRS53A	6.52985	0.000232831	0.000570072	EES		TGME49_207005	SRS48Q	9.42765	1.00288e-92	1.06991e-90	EES
TGME49_238460	SRS22B	5.963	3.29079e-05	9.14121e-05	EES		TGME49_207010	SRS48K	8.67283	1.76231e-34	3.88331e-33	EES
TGME49_251958	SRS59B	5.46143	1.14301e-47	2.05169e-46	EES		TGME49_315380	SRS53B	8.52124	1.03784e-09	5.30626e-09	EES
TGME49_315380	SRS53B	5.37187	0.00200415	0.00425133	EES		TGME49_251962	SRS59K	7.76279	2.25396e-10	1.21789e-09	EES
TGME49_296640	SRS48E	5.04797	2.62197e-13	1.44016e-12	EES		TGME49_238470	SRS22C	7.58048	2.32406e-06	8.28141e-06	EES
TGME49_320250	SRS15A	4.79003	2.14325e-11	1.04178e-10	EES		TGME49_224780	SRS40B	6.99069	0.000619553	0.00154017	EES
TGME49_207010	SRS48K	4.78292	3.27708e-09	1.35474e-08	EES		TGME49_238460	SRS22B	6.61331	3.27716e-07	1.28501e-06	EES
TGME49_207005	SRS48Q	4.63929	7.27039e-16	4.54482e-15	EES		TGME49_275380	SRS47D	6.21014	4.81488e-07	1.84983e-06	EES
TGME49_246070	SRS56	4.52839	2.65831e-76	9.56411e-75	EES		TGME49_315370	SRS53A	6.03865	1.91615e-05	6.06897e-05	EES
TGME49_224760	SRS40E	3.9306	4.72707e-20	3.63984e-19	#N/A		TGME49_224770	SRS40D	5.18262	8.38575e-66	4.58491e-64	EES
TGME49_224770	SRS40D	3.88971	4.62884e-42	7.37659e-41	EES		TGME49_238490	SRS22E	4.06744	2.98165e-35	6.7399e-34	EES
TGME49_320230	SRS15C	3.69812	4.0395e-99	2.32738e-97	#N/A		TGME49_251958	SRS59B	4.00103	4.37401e-38	1.11232e-36	EES
TGME49_238440	SRS22A	3.55047	1.78525e-12	9.37457e-12	#N/A		TGME49_301150	SRS19B	3.82145	4.12431e-122	8.39057e-120	EES
TGME49_254060	SRS14A	3.3877	9.23728e-59	2.18695e-57	EES		TGME49_238440	SRS22A	3.64832	6.37356e-14	4.61555e-13	#N/A
TGME49_238490	SRS22E	3.28539	9.90867e-25	9.02072e-24	EES		TGME49_320230	SRS15C	3.64016	1.76498e-110	2.75716e-108	#N/A
TGME49_319360	SRS17A	3.05109	2.92105e-145	3.5392e-143	EES		TGME49_319360	SRS17A	3.3941	8.50607e-180	5.31508e-177	EES
TGME49_224750	SRS40F	2.88651	7.23975e-10	3.14104e-09	EES		TGME49_275360	SRS47B	3.37524	1.41861e-06	5.173e-06	EES
TGME49_309300	SRS55A	2.65317	3.12214e-06	9.79189e-06	EES		TGME49_320250	SRS15A	3.1239	1.25371e-05	4.06655e-05	EES
TGME49_267130	SRS38A	2.42915	2.67635e-31	3.09263e-30	#N/A		TGME49_224760	SRS40E	2.76546	8.51263e-11	4.76141e-10	#N/A
TGME49_275355	SRS47A	2.11305	4.52314e-11	2.15287e-10	EES		TGME49_208850	SRS11	1.64355	5.59073e-23	7.1294e-22	EES
TGME49_320200	SRS16A	1.69524	3.87892e-38	5.60674e-37	EES		TGME49_315740	SRS54	1.60126	3.07205e-18	2.99602e-17	#N/A
TGME49_285860	SRS20C	1.6429	4.12552e-33	5.09598e-32	EES		TGME49_275355	SRS47A	1.58913	3.41495e-06	1.1902e-05	EES
TGME49_214190	SRS46	1.56244	4.73446e-06	1.45767e-05	EES		TGME49_285860	SRS20C	1.54559	2.76459e-27	4.47864e-26	EES
TGME49_273110	SRS30D	1.47999	2.18195e-08	8.40836e-08	EES		TGME49_301160	SRS19C	1.38599	1.07617e-14	8.22935e-14	#N/A
TGME49_215680	SRS18	1.4661	1.07757e-40	1.66882e-39	#N/A		TGME49_320200	SRS16A	1.32425	2.64161e-24	3.6915e-23	EES
TGME49_315345	SRS52F	1.41489	0.00321876	0.00657885	EES		TGME49_315330	SRS52D	1.03032	0.00128104	0.00302553	#N/A
TGME49_315740	SRS54	1.36494	1.24731e-14	7.38263e-14	#N/A		TGME49_267140	SRS38B	-1.14048	7.35162e-13	4.89437e-12	#N/A
TGME49_315330	SRS52D	1.35393	0.000107585	0.000277518	#N/A		TGME49_285870	SRS20A	-1.17437	2.76171e-36	6.54726e-35	#N/A
TGME49_301150	SRS19B	1.32505	1.77118e-16	1.14006e-15	EES		TGME49_315410	SRS53F	-1.22924	1.29589e-08	5.94466e-08	EES
TGME49_234930	SRS43	1.27611	6.38674e-25	5.87937e-24	#N/A		TGME49_207160	SRS49D	-1.7286	0.00192094	0.00440597	#N/A
TGME49_281930	SRS39	1.02091	1.66719e-14	9.83703e-14	#N/A		TGME49_258550	SRS28	-1.86141	1.40326e-19	1.479e-18	#N/A
TGME49_315320	SRS52A	-1.02568	1.83435e-58	4.29353e-57	#N/A		TGME49_267150	SRS38C	-2.38286	1.03097e-36	2.46418e-35	EES
TGME49_320180	SRS16C	-1.09234	1.66629e-19	1.26182e-18	#N/A		TGME49_267160	SRS38D	-2.53335	8.16181e-29	1.41947e-27	#N/A
TGME49_226860	SRS67	-1.11058	1.17867e-36	1.61582e-35	#N/A		TGME49_254060	SRS14A	-3.32854	3.4151e-18	3.31947e-17	EES
TGME49_308840	SRS51	-1.15029	4.48749e-22	3.76501e-21	#N/A		TGME49_280570	SRS35A	-3.43236	1.90243e-12	1.22102e-11	#N/A
TGME49_319350	SRS17B	-1.15913	6.10605e-77	2.22601e-75	#N/A		TGME49_259270	SRS26E	-3.55184	4.23466e-19	4.36849e-18	EES
TGME49_320190	SRS16B	-1.72555	2.15756e-42	3.47191e-41	#N/A
TGME49_285870	SRS20A	-2.13753	1.03322e-111	7.40237e-110	#N/A
TGME49_207150	SRS49C	-2.39712	0.00200791	0.00425821	#N/A
TGME49_224170	SRS60A	-2.43968	0.000965453	0.00215682	#N/A
TGME49_320170	SRS16E	-2.57972	5.17933e-15	3.1239e-14	EES
TGME49_207160	SRS49D	-2.87211	7.85648e-09	3.15139e-08	#N/A
TGME49_258550	SRS28	-3.52506	2.01058e-95	1.04843e-93	#N/A
TGME49_259270	SRS26E	-4.26984	3.93999e-09	1.61742e-08	EES
TGME49_280570	SRS35A	-4.38492	2.11897e-06	6.79571e-06	#N/A
