# Supplementary material for: AP2XII-1 and AP2XI-2 Suppress Schizogony Gene Expression in Toxoplasma gondii
Source: Int J Mol Sci. 2024 May 18;25(10):5527. doi: 10.3390/ijms25105527 (PMC11122372; doi:10.3390/ijms25105527)
Supplement: Supplementary file 1 [file ijms-25-05527-s001.zip › Table S8.xlsx]

## Sheet: Sheet1
Table S8: AP2 transcription factors regulated by AP2XII-1
		RNA-Seq		Cut-Tag
ID	gene name	log2FoldChange	pvalue	Cut-Tag
TGME49_208020	AP2IB1	2.42927	1.96456e-157	Promoter (1-2kb)
TGME49_318610	AP2IV3	2.41397	9.26421e-107	Promoter (<=1kb)
TGME49_320680	AP2IV2	1.75968	7.37309e-55	Promoter (<=1kb)
TGME49_267460	AP2IX1	1.4088	5.4343e-11	Promoter (<=1kb)
TGME49_224230	AP2X3	1.31924	1.043e-42	Promoter (<=1kb)
TGME49_249190	AP2XII6	1.01505	3.24985e-16	#N/A
TGME49_315760	AP2XI4	-1.00144	1.12183e-30	#N/A
TGME49_211720	AP2IV5	-1.00165	1.32987e-16	#N/A
TGME49_280460	AP2VIIa2	-1.12206	6.3668e-76	Promoter (<=1kb)
TGME49_272710	AP2VIII4	-1.13677	7.06225e-32	Promoter (1-2kb)
TGME49_282210	AP2VIIa8	-1.23318	2.18698e-61	Promoter (<=1kb)
TGME49_310900	AP2XI2	-1.26877	6.33246e-67	Promoter (1-2kb)
TGME49_215150	AP2X9	-1.27127	5.77202e-77	Promoter (<=1kb)
TGME49_237090	AP2X5	-1.31729	1.05391e-59	Promoter (<=1kb)
TGME49_251740	AP2XII9	-1.37342	2.34784e-63	Promoter (<=1kb)
TGME49_318470	AP2IV4	-1.37899	1.24162e-54	Promoter (<=1kb)
TGME49_253380	AP2III2	-1.63181	1.00758e-80	Promoter (<=1kb)
TGME49_217700	AP2XII2	-1.68932	2.63163e-41	#N/A
TGME49_289710	AP2IX5	-1.87649	1.81679e-83	#N/A
TGME49_200385	BFD1	-1.43722	0.107735	Promoter (1-2kb)
