# Supplementary material for: AP2XII-1 and AP2XI-2 Suppress Schizogony Gene Expression in Toxoplasma gondii
Source: Int J Mol Sci. 2024 May 18;25(10):5527. doi: 10.3390/ijms25105527 (PMC11122372; doi:10.3390/ijms25105527)
Supplement: Supplementary file 1 [file ijms-25-05527-s001.zip › Table S9.xlsx]

## Sheet: Sheet1
Table S9: Primers used for this study (Primers for plasmid construction are not listed)
primer name	sequences	usage
Tg-AP2XII-1-5Flank-F	TGCGCCACCGTCGAGAGCGACGTCCCTGCGGCTAGCAAGGGCTCGGGCTCGACCCAGCT	Primers containing 39 bp homology arms were used to amplify the donor DNA for C-terminal epitope AID tagging of TgAP2XII-1
Tg-AP2XII-1-3Flank-R	TACGACTCACTATAGGGCGAATTGGATATCCTCGGCACAACTCTACCTAAGTGGCTTCG
Tg-AP2XI-2-5Flank-F	TGCAGGCAGCCGGACAGGCGGCACCGAAAATGCAGTTGCTAGCAAGGGCTCGGGCTCGA	Primers containing 39 bp homology arms were used to amplify the donor DNA for C-terminal epitope AID tagging of TgAP2XI-2
Tg-AP2XI-2-3Flank-R	CACGATCAGCTTCACATTCCCCGACGCTCGCATGCGCGTGTCACTGTAGCCTGCCAGAA
TgAP2XII-1-identify-5'F	GTCTCTGAAGAGTCTCCGGA	Primers were used to identify the homologus recombination for TgAP2XII-1 gene tagging 5'
TgAID-identify-5'R	TGAGTTACGCCTTCGGCATC
TgAID-identify-3'F	TCTTCACCGCGAACGATTGG	Primers were used to identify the homologus recombination for TgAP2XII-1 gene tagging 3'
TgAP2XII-1-identify-3'R	TCGCTAACGCAACACCTTAA
TgAP2XI-2-identify-5'F	AAGGAAACGTAGCGGCGAAC	Primers were used to identify the homologus recombination for TgAP2XI-2 gene tagging 5'
TgAID-identify-5'R	TGAGTTACGCCTTCGGCATC
TgAID-identify-3'F	TCTTCACCGCGAACGATTGG	Primers were used to identify the homologus recombination for TgAP2XI-2 gene tagging 3'
TgAP2XI-2-identify-3'R	ACTGCCCGAATGTTGCAGTA
TgAP2XII-1-identify-clone-5'F	ACTGCCAGTGGAGAAACACC	Primers were used to identify the monoclone TgAP2XII-1 gene tagging 5'
TgAP2XII-1-identify-clone-5'R	TCTCGCCGAGCTGTTCCATT
TgAP2XII-1-identify-clone-3'F	AAGACGCATGTGGAACTGCG	Primers were used to identify the monoclone TgAP2XII-1 gene tagging 3'
TgAP2XII-1-identify-clone-3'R	AGTTGCAGTTGTGGACATCC
TgAP2XI-2-identify-clone-5'F	GAAAGAGAGGCGAGTGAGTC	Primers were used to identify the monoclone TgAP2XI-2 gene tagging 5'
TgAP2XI-2-identify-clone-5'R	GCACACGATCAGCTTCACAT
TgAP2XI-2-identify-clone-3'F	ATTATTCCCTAGAGGCACCC	Primers were used to identify the monoclone TgAP2XI-2 gene tagging 3'
TgAP2XI-2-identify-clone-3'R	TGAAACGACATGTCGACGAA
pSAG1-Lucifer-F	AATGTGGTGCTCATGAAGCAGACGGCTCAGCTTCGAGCGAAAGCTTCGCCAGGCTGTAA	Primers containing 39 bp homology arms were used to amplify the donor DNA for SAG1-Lucifer of UPRT
pSAG1-Lucifer-R	GATGTCTGTGGTCCCCAGGTAGCGAGAACGCAAACAAGTCGTGTCACTGTAGCCTGCCA
